# Supplementary material
Source: Elsevier journal article supplement (https://www.sciencedirect.com/science/article/pii/S0300289621004099)
Supplement: mmc2 [file S0300289621004099:mmc2.pdf]

## 1.2. PREVALENCIA DE LOS PRINCIPALES PROBLEMAS DE SUEÑO

**EDITOR:** Josep M.<sup>a</sup> Montserrat. Unidad Multidisciplinar de Patología del Sueño y VNID, Servei Pneumologia, Institut Clínic Respiratori, Hospital Clínic, Barcelona, España; Universidad de Barcelona, Barcelona, Centro de Investigación Biomédica en Red de Enfermedades Respiratorias (CIBERES), Madrid, España

**Mercedes Mayos Pérez.** Coordinadora de la Unidad Multidisciplinar del Sueño. Hospital de la Santa Creu i Sant Pau. Barcelona; Profesora Asociada. Facultad de Medicina. Universitat Autònoma de Barcelona; Secretaría del Área TRS-VM-CCR. SEPAR. Ciber enfermedades respiratorias. CIBERES.

Aproximadamente un 30% de la población padece algún tipo de trastorno del sueño<sup>1</sup>. Las cifras de prevalencia publicadas en algunos de los principales trastornos de sueño son muy dispares<sup>2</sup>. De hecho, el estudio de la epidemiología de las alteraciones del sueño es un área de investigación en medicina relativamente joven. El primer trabajo en este ámbito se publicó en 1979 y, aunque limitado a preguntas simples de sí/no, ya documentó una amplia gama de trastornos de sueño<sup>3</sup>. Desde entonces se han producido considerables avances en este campo, no solo debidos al desarrollo tecnológico, sino especialmente al fortalecimiento de la metodología empleada. Por ejemplo, en el campo de la investigación epidemiológica sobre el insomnio se ha evolucionado de la mera valoración sobre la ausencia/presencia de síntomas a la evaluación de su frecuencia, gravedad y, muy importante, la evaluación de los efectos perjudiciales durante la vigilia. Estas diferencias metodológicas explican las enormes discrepancias en las cifras de prevalencia publicadas.

Los datos de prevalencia del insomnio son un ejemplo de esta disparidad. En un estudio realizado en población española<sup>4</sup> que incluyó 4.065 participantes con más de 15 años de edad, el 20,8% (intervalo de confianza [IC] del 95%: 19,6-22,1%) presentó algún síntoma de insomnio al menos 3 noches/semana, con un predominio en mujeres del 23,9% frente a un 17,6% en hombres. Ahora bien, cuando se aplicaron los criterios de diagnóstico del Manual Diagnóstico y Estadístico de los Trastornos Mentales, versión IV (DSM-IV)<sup>5</sup>, el porcentaje se redujo a un 6,4% (IC del 95%: 5,5-7,1%), también con claro predominio en la población femenina, 7,8% frente al 4,9% en hombres.

Las apneas durante el sueño es uno de los trastornos de sueño más prevalentes. Muy recientemente se ha publicado un estudio cuyo objetivo ha sido analizar la carga global mundial que representa la entidad<sup>6</sup>. Según la *American Academy of Sleep Medicine* (AASM)<sup>7</sup> se concluye que a nivel mundial alrededor de un billón de personas puede tener potencialmente apneas durante el sueño, pero con importantes diferencias en la prevalencia según el área geográfica. Los datos de prevalencia de la apnea obstructiva del sueño de los principales estudios analizados se resumen en la **tabla 1**.

**Tabla 1.** Prevalencia del síndrome de apnea-hipopnea del sueño correspondiente a estudios realizados en diferentes áreas geográficas.

| <b>País</b>          | <b>Autor</b>              | <b>Rango de edad</b> | <b>Hombres (%)</b> | <b>Criterios de análisis</b> | <b>IAH &gt; 5<br/>Hombre<br/>Mujer</b> | <b>IAH &gt; 15<br/>Hombre<br/>Mujer</b> |
|----------------------|---------------------------|----------------------|--------------------|------------------------------|----------------------------------------|-----------------------------------------|
| <b>Australia</b>     | Marshall NS<br>2008       | 40-65                | 73%                | AASM<br>2012                 | 25,5%<br>23,5%                         | 4,7%<br>4,9%                            |
| <b>Brasil</b>        | Tufik S<br>2010           | 20-80                | 45%                | AASM<br>2007                 | 46,5%<br>30,6%                         | 24,8%<br>9,6%                           |
| <b>Alemania</b>      | Fietze I<br>2018          | 20-81                | 54%                | AASM<br>2007                 | 59,4%<br>33,2%                         | 29,7%<br>13,2%                          |
| <b>Hong Kong</b>     | Ip MS<br>2001             | 30-60                | 100%               | AASM<br>2007                 | 8,8%                                   | 5,3%                                    |
| <b>Hong Kong</b>     | Ip MS<br>2004             | 30-60                | 0%                 | AASM<br>2007                 | 3,7%                                   | 1,9%                                    |
| <b>Islandia</b>      | Arnardottir ES<br>2016    | 40-65                | --                 | AASM<br>2007                 | 13,3%<br>10,8%                         | 10,6%<br>4,8%                           |
| <b>Japón</b>         | Nakayama-Ashida Y<br>2008 | 23-59                | --                 | AASM<br>2012                 | 59,7%                                  | 22,3%                                   |
| <b>Nueva Zelanda</b> | Mihaere kM<br>2009        | 30-59                | --                 | AASM<br>2007                 | 12,5%<br>3,4%                          | 3,9%<br>0,2%                            |
| <b>Noruega</b>       | Hrubos-Strom H<br>2011    | 30-65                | 55%                | AASM<br>2007                 | 21%<br>13%                             | 11,0%<br>6,0%                           |
| <b>Polonia</b>       | Plywaczewski R<br>2008    | 41-72                | 54%                | AASM<br>2007                 | 36,2%<br>18,4%                         | 15,8%<br>7,6%                           |
| <b>Corea del Sur</b> | Kim J<br>2004             | 40-69                | 69%                | AASM<br>2007                 | 27,1%<br>16,8%                         | 10,1%<br>4,7%                           |
| <b>Singapur</b>      | Tan A<br>2016             | 21-79                | 50%                | AASM<br>2007                 | 62,3%<br>62,3%                         | 26,1%<br>26,1%                          |
| <b>Singapur</b>      | Tan A                     | 21-79                | 50%                | AASM<br>2012                 | 70,8%<br>70,8%                         | 30,5%<br>30,5%                          |

|               |                    |       |     |              |                |                |
|---------------|--------------------|-------|-----|--------------|----------------|----------------|
|               | 2016               |       |     |              |                |                |
| <b>Suiza</b>  | Heinzer R<br>2015  | 40-85 | 48% | AASM<br>2012 | 83,8%<br>60,8% | 49,7%<br>23,4% |
| <b>EE.UU.</b> | Peppard PE<br>2013 | 30-70 | 55% | AASM<br>2007 | 33,9%<br>17,4% | 13,0%<br>6,0%  |
| <b>España</b> | Duran J<br>2001    | 30-70 | 49% | AASM<br>2007 | 26,2%<br>28,0% | 14,2%<br>7,0%  |

IAH: índice de apnea-hipopnea por hora; AASM: American Academy of Sleep Medicine. Tomada de referencia 6.

El síndrome de las piernas inquietas (SPI), o enfermedad Willis-Ekbom, es también un trastorno común que, aunque no exclusivamente limitado al sueño, sí tiene un claro ritmo circadiano con aparición o agravamiento de los síntomas al final del día que puede prolongarse durante las horas de sueño. Los datos de prevalencia nuevamente son muy variables según los criterios que se adopten para el diagnóstico. En un estudio realizado en 2010 en seis países europeos (Dinamarca, Alemania, Holanda, Irlanda, España y Reino Unido)<sup>8</sup>, los datos poblacionales mostraron, tras una encuesta telefónica, que entre un 9,4% y un 15% de la población adulta tenía algún síntoma de SPI. Cuando se aplicaron los criterios de diagnóstico mínimos del *International Restless Legs Syndrome Study Group* (IRLSSG)<sup>9</sup>, el porcentaje se situó entre un 3,9% y un 14%. Por último, cuando las personas fueron entrevistadas por un médico con experiencia que realizó un diagnóstico diferencial, el porcentaje osciló entre un 1,9% y un 4,6%. En todos los casos la prevalencia del SPI fue superior en mujeres que en hombres.

En el extremo opuesto, por lo que se refiere a su frecuencia, se sitúa la narcolepsia, una enfermedad de muy rara presentación cuya prevalencia total se cifra en 79,4/100.000. La entidad es más frecuente en mujeres y se presenta preferentemente con el síntoma de cataplexia, 65,4/100.000 frente a un 14/100.000 (IC del 95%: 13,2-14,8%) sin cataplexia<sup>10</sup>.

Por último, en el grupo de las parasomnias, hay que destacar por sus implicaciones clínicas, el trastorno de conducta durante el sueño REM (TCSR). En un estudio de ámbito nacional realizado en población de más de 60 años atendida en atención primaria<sup>11</sup>, la prevalencia del TCSR idiopático fue del 0,74% (IC del 95%: 0,29-1,89). El TCSR idiopático puede constituir un síntoma precoz de determinados trastornos neurodegenerativos como la enfermedad de Parkinson, la demencia con cuerpos de Lewy o la atrofia multisistémica, en los que la prevalencia del trastorno es muy elevada. Sin embargo, en un estudio reciente en Israel analizando 195,201 sujetos muestra de nuevo como los trastornos respiratorios del sueño junto al insomnio son entidades mucho más frecuentes<sup>12</sup>.

## BIBLIOGRAFÍA:

1. Kerkhof GA. Epidemiology of sleep and sleep disorders in Netherlands. *Sleep Medicine* 2017;30:229-39. doi: 10.1016/j.sleep.2016.09.015.
2. Ferrie JE, Kumari M, Salo P, Singh-Manoux A, Kivimäki M. Sleep epidemiology a rapidly growing field. *Int J Epidemiol* 2011;40:1431-7. doi: 10.1093/ije/dyr203.
3. Bixler EO, Kales A, Soldatos CR, Kales JD, Healey S. Prevalence of sleep disorders in the Los Angeles metropolitan area. *Am J Psychiatry* 1979(10);136:1257-62. doi: 10.1176/ajp.136.10.1257.
4. Ohayon MM, Sagales T. Prevalence of insomnia and sleep characteristics in the general population of Spain. *Sleep Med* 2010;11:1010-8. doi: 10.1016/j.sleep.2010.02.018.
5. American Psychiatric Association. Diagnostic and Statistical Manual of Mental Disorders, 4.<sup>a</sup> ed. (DSM-IV). Washington, DC: American Psychiatric Association 1994. Disponible en: <https://dsm.psychiatryonline.org> › pdf › appi.books.9780890420249.dsm-iv-tr.
6. Benjafield AV, Ayas NT, Eastwood PR, Heinzer R, Ip M, Morrell, Nunez CM, et al. Estimation of the global prevalence and burden of obstructive sleep apnoea: a literature-based analysis. *Lancet Respir Med* 2019;7:687-98. doi: 10.1016/S2213-2600(19)30198-5.
7. Berry RB, Budhiraja R, Gottlieb DJ, Gozal D, Iber C, Kapur VK, et al; American Academy of Sleep Medicine. Rules for scoring respiratory events in sleep: update of the 2007 AASM Manual for the Scoring of Sleep and Associated Events. Deliberations of the Sleep Apnea Definitions Task Force of the American Academy of Sleep Medicine. *J Clin Sleep Med* 2012;8:597-619. doi: 10.5664/jcsm.2172.
8. Ohayon MM, O'Hara R, Vitiello MV. Epidemiology of restless legs syndrome: a synthesis of the literature. *Sleep Med Rev* 2012;16:283-95. doi: 10.1016/j.sleep.2010.02.018.
9. Walters AS, LeBrocq C, Dhar A, Hening W, Rosen R, Allen RP, et al; International Restless Legs Syndrome Study Group. Validation of the International Restless Legs Syndrome Study Group rating scale for restless legs syndrome. *Sleep Med* 2003;4(2):121-32. doi: 10.1016/S1389-9457(02)00258-7.
10. Scheer D, Schwartz SW, Parr M, Zgibor J, Sánchez-Anguiano A, Rajaram L. Prevalence and Incidence of Narcolepsy in a U.S. Health Care Claims Database, 2008-2010. *Sleep* 2019;42(7):zsz091. doi: 10.1093/sleep/zsz091.
11. Pujol M, Pujol J, Alonso T, Fuentes A, Pallerola M, Freixenet J, et al. Idiopathic REM sleep behavior disorder in the elderly Spanish community: a primary care center study with a two-stage design using video-polysomnography. *Sleep Med* 2017;40:116-21. doi: 10.1016/j.sleep.2017.07.021.
12. Fund N, Green A, Chodick G, Orin M, Koren G, Shalev V et al. The epidemiology of sleep disorders in Israel: results from a population-wide study. *Sleep Med.* 2020; 67:120-127. doi: 10.1016/j.sleep.2019.10.010
