# Supplementary material
Source: Elsevier journal article supplement (https://www.sciencedirect.com/science/article/pii/S0300289621004099)
Supplement: mmc3 [file S0300289621004099:mmc3.pdf]

## 2.1. LA APNEA OBSTRUCTIVA DEL SUEÑO

**Nicolás González Mangado (editor).** Jefe de Servicio de Neumología. Director de la Unidad Multidisciplinar de Sueño (UMS). Fundación Jiménez Díaz. Instituto Investigación Sanitaria FJD. Madrid. Centro de Investigación Biomédica en Red de Enfermedades Respiratorias (CIBERES), Madrid, Spain.

**Carmen Monasterio.** Unidad Multidisciplinar del Sueño. Hospital Universitario de Bellvitge. Instituto de Investigación Biomédica de Bellvitge (IDIBELL). CIBERES. Barcelona.

**Neus Salord.** Unidad Multidisciplinar del Sueño. Hospital Universitario de Bellvitge. Instituto de Investigación Biomédica de Bellvitge (IDIBELL). CIBERES. Barcelona.

## 1. Definición, fisiopatología y aspectos biológicos

### 1.1. Definición

La apnea obstructiva del sueño (AOS) consiste en la aparición de episodios recurrentes de obstrucción total o parcial de la vía aérea superior (VAS) a consecuencia de una alteración anatómico-funcional de origen poligénico, provocando descensos de la saturación de oxihemoglobina ( $SpO_2$ ), cambios de presión intratorácica y microdespertares que dan lugar a un sueño no reparador, somnolencia diurna excesiva, trastornos cognitivos conductuales, respiratorios, cardiovasculares, metabólicos o inflamatorios.

Guilleminault y cols.<sup>1</sup> definieron el término de síndrome de apnea del sueño para describir sujetos con apneas obstructivas y somnolencia diurna durante el día, describiendo su aparición también en pacientes no obesos. Actualmente se denomina OSAS (*obstructive sleep apnea syndrome*) en la bibliografía anglosajona o SAOS (síndrome de apneas obstructivas del sueño), simplemente OSA (*obstructive sleep apnea*) o SAS (síndrome de apnea del sueño), o síndrome de apneas hipopneas del sueño SAHS (que incluye en la definición las hipopneas). En el documento de consenso del 2005 se recomendó usar el concepto de síndrome de apneas-hipopneas del sueño y sus siglas SAHS debido a que incluía una referencia específica a las hipopneas, las cuales se consideran que tienen un impacto equiparable al de las apneas, tanto en adultos como en niños.<sup>2</sup> Este Documento Internacional de Consenso (DIC) propone introducir de nuevo el término “obstructiva” a las siglas aceptadas en 2005 del SAHS, dado que define la naturaleza de la enfermedad, y de esta manera la diferencia claramente de la apnea central del sueño. Se decide simplificar y eliminar la palabra “hipopnea”, así como la palabra “síndrome”, que es una terminología anticuada. Por tanto, se recomienda usar la denominación de apnea obstructiva del sueño y sus siglas AOS. Las principales definiciones previas de la AOS se presentan en la [tabla 1](#).

Este DIC define la AOS como (1 o 2):

1. La presencia de un IAH  $\geq 15$  episodios respiratorios/h, predominantemente obstructivos.

2. La presencia de un  $IAH \geq 5/h$  acompañado de uno o más de los siguientes: excesiva somnolencia durante el día, sueño no reparador, cansancio excesivo y/o deterioro de la calidad de vida relacionado con el sueño, no justificables por otras causas.

**Tabla 1.** Definiciones de la Apnea Obstructiva del Sueño (AOS), descripción y comparativa de sus limitaciones. ERAM: esfuerzos respiratorios asociados a microdespertares; PRD: poligrafía respiratoria en domicilio; PSG: polisomnografía. SAHS: síndrome de apneas hipopneas del sueño; IAH: índice de apneas hipopneas; IAR: índice de alteración respiratoria;

| ORGANISMO                                         | DEFINICIÓN                                                                                                                                                                                                                                                                                                                                                                                                                                                                                                                                                                 | DESCRIPCIÓN/LIMITACIONES                                                                                                                                                                                                                                                                                                                                                                                                                                                                                                                                                                                          |
|---------------------------------------------------|----------------------------------------------------------------------------------------------------------------------------------------------------------------------------------------------------------------------------------------------------------------------------------------------------------------------------------------------------------------------------------------------------------------------------------------------------------------------------------------------------------------------------------------------------------------------------|-------------------------------------------------------------------------------------------------------------------------------------------------------------------------------------------------------------------------------------------------------------------------------------------------------------------------------------------------------------------------------------------------------------------------------------------------------------------------------------------------------------------------------------------------------------------------------------------------------------------|
| SEPAR 2005 <sup>2</sup>                           | <p>La SAHS se define como un cuadro de somnolencia excesiva, trastornos cognitivo-conductuales, respiratorios, cardíacos, metabólicos o inflamatorios secundarios a episodios repetidos de obstrucción de la vía respiratoria superior durante el sueño</p> <p>Estos episodios se miden con el índice de alteración respiratoria (IAR). Un IAR <math>\geq 5</math> asociado con síntomas relacionados con la enfermedad y no explicados por otras causas confirma el diagnóstico</p>                                                                                       | <p><b>Descripción:</b> pondera en conjunto el índice de apnea-hipopnea (IAH) con un único punto de corte y las manifestaciones clínicas, así como las consecuencias a medio y largo plazo</p> <p><b>Limitaciones:</b> considerar la AOS un <math>IAH \geq 5</math> es controvertido, ya que se basa en estudios antiguos y con pocos sujetos y puede ser excesivamente bajo</p>                                                                                                                                                                                                                                   |
| American Academy Sleep Medicine 2014 <sup>3</sup> | <p>A. La presencia de al menos uno de los siguientes:</p> <ol style="list-style-type: none"> <li>1. El paciente se queja de excesiva somnolencia durante el día, sueño no reparador, fatiga o síntomas de insomnio</li> <li>2. El paciente tiene despertares asfícticos</li> <li>3. Su compañera/o de cama u otro observador refieren que el paciente tiene ronquido habitual y/o pausas respiratorias y/o apneas observadas mientras duerme</li> <li>4. El paciente ha sido diagnosticado de hipertensión arterial, tiene alteraciones de carácter, disfunción</li> </ol> | <p><b>Descripción:</b> pondera en conjunto el IAH y las manifestaciones clínicas y sus comorbilidades, haciendo especial hincapié en comorbilidades como hipertensión arterial, enfermedad coronaria, ictus, fibrilación auricular, insuficiencia cardíaca y diabetes</p> <p><b>Limitaciones:</b> considerar la AOS un <math>IAH \geq 5</math> es controvertido, ya que se basa en estudios antiguos y con pocos sujetos y puede ser excesivamente bajo, en especial en los ancianos. Por este motivo, incluye un segundo punto de corte <math>IAH \geq 15</math> sin la necesidad de síntomas o comorbilidad</p> |

|  |                                                                                                                                                                                                                                                                                                                                                                                                                                                                                                                                                                                                                   |  |
|--|-------------------------------------------------------------------------------------------------------------------------------------------------------------------------------------------------------------------------------------------------------------------------------------------------------------------------------------------------------------------------------------------------------------------------------------------------------------------------------------------------------------------------------------------------------------------------------------------------------------------|--|
|  | <p>cognitiva, enfermedad coronaria, ictus, insuficiencia cardíaca, fibrilación auricular o diabetes tipo 2.</p> <p>B. Prueba de sueño (polisomnografía convencional o poligrafía respiratoria en domicilio) que evidencia <math>\geq 5</math> episodios respiratorios/h de sueño (PSG) u hora de registro (PRD), predominantemente obstructivos (apneas obstructivas o mixtas, hipopneas o ERAM)</p> <p>C. PSG o PRD que evidencia <math>\geq 15</math> episodios respiratorios/h de sueño PSG u hora de registro PRD, predominantemente obstructivos (apneas, hipopneas o ERAM)</p> <p><b>AOS = A+ B o C</b></p> |  |
|--|-------------------------------------------------------------------------------------------------------------------------------------------------------------------------------------------------------------------------------------------------------------------------------------------------------------------------------------------------------------------------------------------------------------------------------------------------------------------------------------------------------------------------------------------------------------------------------------------------------------------|--|

Guilleminault y cols. definieron una apnea como el cese completo de la señal respiratoria de al menos 10 s de duración <sup>1</sup>. Hay que decir que el criterio de los 10 s fue adoptado por consenso, basado en un grupo de sujetos voluntarios, y se corresponde aproximadamente a dos ciclos respiratorios. Sin embargo, tiene algunas limitaciones: no contempla la presencia o ausencia de desaturaciones asociadas y/o *arousal* electroencefalográficos (microdespertares), por lo que no evalúa las consecuencias de las mismas en términos de intercambio gaseoso o fragmentación del sueño. Por otra parte, es muy posible que mantener una pausa de 10 s no sea lo mismo a los 30 años que a los 80, e incluso podría ser diferente en varones y mujeres. Además, no tiene en cuenta la comorbilidad asociada, como las enfermedades cardíacas y/o respiratorias que reduzcan la reserva de oxígeno o aumenten su consumo, lo que podría condicionar que pausas < 10 s pudieran tener significación patológica. A pesar de estas potenciales limitaciones, el concepto de apnea se ha mantenido hasta la actualidad con la única salvedad de que un cese total (línea plana) no suele observarse con equipos actuales con señales de alta sensibilidad y, en general, se acepta que hay apnea cuando la reducción de la señal respiratoria es  $\geq 90\%$ <sup>2</sup>. Block y cols.<sup>4</sup> establecieron el concepto de hipopneas como una reducción parcial de la señal respiratoria que cursaba con desaturación, y comprobaron que sus repercusiones eran similares a las de las apneas, por lo que acuñaron el término “síndrome de hipopneas durante el sueño”. Se ha comprobado que las hipopneas tienen un efecto negativo sobre la salud equiparable a las apneas.<sup>5</sup> Aunque la definición de hipopnea es controvertida, la American Academy of Sleep Medicine (AASM)<sup>6</sup> define *hipopnea* como una reducción de al menos el 30% de  $\geq 10$  s de la señal respiratoria que cursa con una disminución de la saturación  $\geq 3\%$  y/o un despertar transitorio (*arousal*) en el electroencefalograma. Alternativamente, la misma AASM da la opción de definir la hipopnea por la caída de la señal respiratoria de  $\geq 30\%$  de  $\geq 10$  s que cursa con

una disminución de la saturación  $\geq 4\%$  y/o un despertar transitorio (*arousal*) en el electroencefalograma<sup>6</sup>. La elección de uno u otro punto de corte de desaturación puede implicar una variación de hasta un 20% del diagnóstico de la AOS y puede tener efecto en la detección de AOS asociado a la fase REM del sueño y a la AOS posicional<sup>7</sup>. Por otro lado, existen estudios que demuestran mayor asociación de AOS definida con el punto de corte del 3% con la hipertensión y otros en cambio, hallan mayor asociación de la AOS definida con el punto de corte de desaturación del 4% y la enfermedad cardiovascular especialmente en gente mayor. Está, por tanto, por determinar si la definición de las hipopneas y sus implicaciones a largo plazo (cardiovasculares, metabólicas, neurocognitivas, etc.) pueden variar según la edad, género e índice de masa corporal (IMC). Tampoco hay un criterio unánime en su definición y los descensos de la señal del flujo varían del 30% al 90% y, a pesar de las limitaciones, el consenso SEPAR 2005 optó por considerar hipopnea a cualquier reducción del flujo que el observador considerase “significativa” o “discernible” acompañada por un descenso de la SpO<sub>2</sub> de  $\geq 3\%$  y/o microdespertar<sup>2</sup>. Por otra parte, la definición de *arousal* o microdespertar estandarizada por la AASM<sup>6</sup> ha demostrado tener una importante variabilidad tanto interobservador como intraobservador. Actualmente para codificar una apnea o una hipopnea, la duración del episodio se mide desde el punto más bajo que precede a la primera respiración, que se reduce claramente hasta el comienzo de la primera respiración que se aproxima a la amplitud de la respiración de referencia<sup>6</sup>.

Otro aspecto muy importante en la caracterización de las hipopneas es el modo en que medimos la ventilación. Así, el neumotacógrafo y la pletismografía corporal pueden considerarse los patrones de referencia. Actualmente, el empleo de sondas nasales de presión tiene una elevada sensibilidad para detectar la limitación del flujo aéreo y son elementos útiles para detectar las hipopneas. A pesar de estas limitaciones, este DIC recomienda, como definición más aceptada de hipopnea, la objetivación de una reducción claramente discernible de la señal respiratoria (aproximadamente  $\geq 30\%$  y  $< 90\%$ )  $\geq 10$  s de duración que cursa con una disminución de la saturación  $\geq 3\%$  y/o un microdespertar en el electroencefalograma. En la **tabla 2** se presenta un resumen de las diferentes definiciones de los episodios respiratorios, así como la definición de microdespertar o *arousal*.

**Tabla 2.** Definición y nomenclatura aceptadas por este DIC de los episodios respiratorios.

|                          |                                                                                                                                                                                                                                        |
|--------------------------|----------------------------------------------------------------------------------------------------------------------------------------------------------------------------------------------------------------------------------------|
| <b>Apnea obstructiva</b> | Ausencia o reducción $\geq 90\%$ de la señal respiratoria de $\geq 10$ s de duración en presencia de esfuerzo respiratorio                                                                                                             |
| <b>Apnea central</b>     | Ausencia o reducción $\geq 90\%$ de la señal respiratoria de $\geq 10$ s de duración en ausencia de esfuerzo respiratorio                                                                                                              |
| <b>Apnea mixta</b>       | Ausencia o reducción $\geq 90\%$ de la señal respiratoria de $\geq 10$ s que comienza con ausencia de esfuerzo respiratorio y se reanuda en la segunda parte del episodio                                                              |
| <b>Hipopnea</b>          | Reducción discernible (aproximadamente $\geq 30\%$ y $< 90\%$ ) de la amplitud de la señal respiratoria de $\geq 10$ s de duración que se acompaña de una desaturación ( $\geq 3\%$ ) y/o un microdespertar en el electroencefalograma |

|                                 |                                                                                                                                                                                                                                                                                                                                                                               |
|---------------------------------|-------------------------------------------------------------------------------------------------------------------------------------------------------------------------------------------------------------------------------------------------------------------------------------------------------------------------------------------------------------------------------|
| <b>Hipopnea obstructiva</b>     | Se considera hipopnea obstructiva si cumple alguno de los siguientes criterios: <ul style="list-style-type: none"> <li>• Aparece ronquido durante el episodio</li> <li>• Si existe movimiento paradójico toracoabdominal durante el episodio y no previamente</li> <li>• Existe un aplanamiento inspiratorio de la onda de presión respecto a la respiración basal</li> </ul> |
| <b>Hipopnea central</b>         | Se considera hipopnea central cuando existe una reducción proporcional del flujo inspiratorio y la amplitud del movimiento toracoabdominal sin cumplir los criterios de hipopnea obstructiva                                                                                                                                                                                  |
| <b>Arousal o microdespertar</b> | Aparición de ritmos alfa o theta o ritmos superiores a 16 Hz (no incluye usos de sueño o <i>spindles</i> ) en cualquier fase de sueño, $\geq 3$ s y precedida por al menos 10 s de sueño estable. En la fase REM del sueño tiene que ir acompañada de aumento del tono muscular en el electromiograma mentoniano durante al menos 1 s                                         |
| <b>Índice de apnea-hipopnea</b> | Consiste en la suma del número de apneas e hipopneas por hora de sueño, o bien por hora de registro si se usa poligrafía respiratoria                                                                                                                                                                                                                                         |

Tanto las apneas como las hipopneas pueden ser: obstructivas, cuando se acompañan de un aumento del esfuerzo toracoabdominal; centrales, si este esfuerzo está ausente, o mixtas, cuando se produce una combinación de ambos. Habitualmente comienzan con un componente central y terminan con un componente obstructivo. La clasificación de hipopnea en obstructiva o central es más difícil. La AASM propone una definición que este consenso recomienda<sup>6</sup>. Se considera hipopnea obstructiva si cumple alguno de los siguientes criterios: aparece ronquido durante el evento, si existe movimiento paradójico toracoabdominal durante el evento y no previamente y/o existe un aplanamiento inspiratorio de la onda de presión respecto a la respiración basal<sup>6</sup>.

El número de apneas más hipopneas dividido por las horas de sueño es el índice de apnea-hipopnea (IAH). Hace años se describió una definición complementaria denominada esfuerzos respiratorios asociados a microdespertares (ERAM) que consistía en períodos  $\geq 10$  s, sin reducción marcada de la amplitud del flujo y que terminaban con un microdespertar, sin cumplir con los criterios de hipopnea<sup>2</sup>. Este concepto como entidad aparte es discutido por algunos autores, ya que para muchos representan hipopneas. Actualmente, con los sensores disponibles, la mayoría de estos episodios se pueden clasificar como hipopneas con despertar. Este DIC recomienda codificar este tipo de episodios como hipopneas y no como ERAM.

Aunque hay una clara evidencia de que un IAH  $> 30$  está asociado a un deterioro del estado de salud, un índice de más de 30 no siempre supone tener una AOS grave, ya que dependerá de otros factores. Por tanto, se considera que la clasificación de AASM basada únicamente en el IAH es muy limitada

(Tabla 3), dado que el IAH depende en gran medida de la identificación de los *arousals* y, por tanto, en la monitorización del sueño no tiene en cuenta medidas tan importantes y que han demostrado ser factores predictores de enfermedad cardiovascular como las desaturaciones y tampoco sus consecuencias a largo plazo. De hecho, uno de los retos actuales es definir de forma más precisa la enfermedad en base no solo al IAH, sino también a variables fisiopatológicas, clínicas, bilógicas que puedan predecir el pronóstico de la enfermedad y la respuesta al tratamiento. Pese a sus limitaciones y debilidades, el IAH ha proporcionado unos puntos de corte estandarizados fácilmente obtenibles, que hasta ahora han permitido comparar estudios entre centros y han servido como principal objetivo de respuesta al tratamiento en múltiples estudios. Sin embargo, aunque el diagnóstico de la AOS se basa en resultados de estudios de sueño, estos por sí solos no reflejan la heterogeneidad de la enfermedad ni tampoco el grado de gravedad.

**Tabla 3.** Definición de la gravedad del AOS según la American Academy of Sleep Medicine

|              |                            |
|--------------|----------------------------|
| AOS leve     | $\geq 5 < 15$ episodios/h  |
| AOS moderada | $\geq 15 < 30$ episodios/h |
| AOS grave    | $\geq 30$ episodios/h      |

Otro aspecto importante en la definición de la AOS es su asociación con síntomas clínicos y en particular la excesiva somnolencia diurna (ESD). Este planteamiento quedó establecido a partir del primer estudio epidemiológico publicado por Young y cols.<sup>8</sup>. Este estudio de la conocida cohorte de Wisconsin definió la AOS como un IAH  $\geq 5$  y la presencia de ESD. Además, como se debatirá más adelante en este capítulo, la somnolencia es un síntoma muy frecuente en la población general. Otros síntomas nocturnos como los despertares asfícticos han demostrado ser mejores predictores de la enfermedad, e incluso estudios de cohortes han demostrado que pacientes con síntomas de dificultad para iniciar o mantener el sueño pueden tener más riesgo de presentar comorbilidades cardiovasculares y psiquiátricas. Finalmente, la gravedad de una patología no puede obviar el daño orgánico establecido.

Este DIC considera limitada la clasificación de gravedad basada únicamente en el IAH, ya que no refleja la heterogeneidad de la enfermedad. En línea con el pensamiento actual de la comunidad científica<sup>9,10</sup>, considera prioritaria la búsqueda de nuevas escalas que reflejen esta heterogeneidad y sean predictoras de sus efectos a largo plazo. Dado que no existe a día de hoy una escala validada y aunque no están claramente establecidos los factores ni puntos de corte que conducen a la condición de gravedad, este DIC recomienda tener en cuenta lo siguiente: el IAH; tiempo acumulado con saturación de oxihemoglobina por debajo del 90% (CT 90%), como reflejo de la hipoxemia; somnolencia diurna; grado de obesidad medido por el IMC y comorbilidades que se han relacionado con la AOS (HTA, especialmente si es resistente al tratamiento o tiene un patrón *non-dipper*; diabetes tipo 2; dislipidemia; enfermedad coronaria; ictus; insuficiencia cardíaca o fibrilación auricular). En la figura 1 se representa la gravedad según la combinación de estos parámetros.

**Figura 1.** Valoración de la gravedad del paciente con apnea obstructiva del sueño (AOS) en función de distintos parámetros objetivos sugerida por el Documento Internacional de Consenso.



CI: cardiopatía isquémica; CT 90%: tiempo acumulado con saturación de oxihemoglobina por debajo del 90%; CV: enfermedad cardiovascular o cerebrovascular; DLP: dislipidemia; DM2: diabetes mellitus tipo 2; Epworth: escala de somnolencia de Epworth; EVC: enfermedad vascular cerebral; FRCV: factores de riesgo cardiovascular; HTA: hipertensión arterial; IAH: índice de apnea-hipopnea; ICC: insuficiencia cardíaca congestiva; IMC: índice de masa corporal.

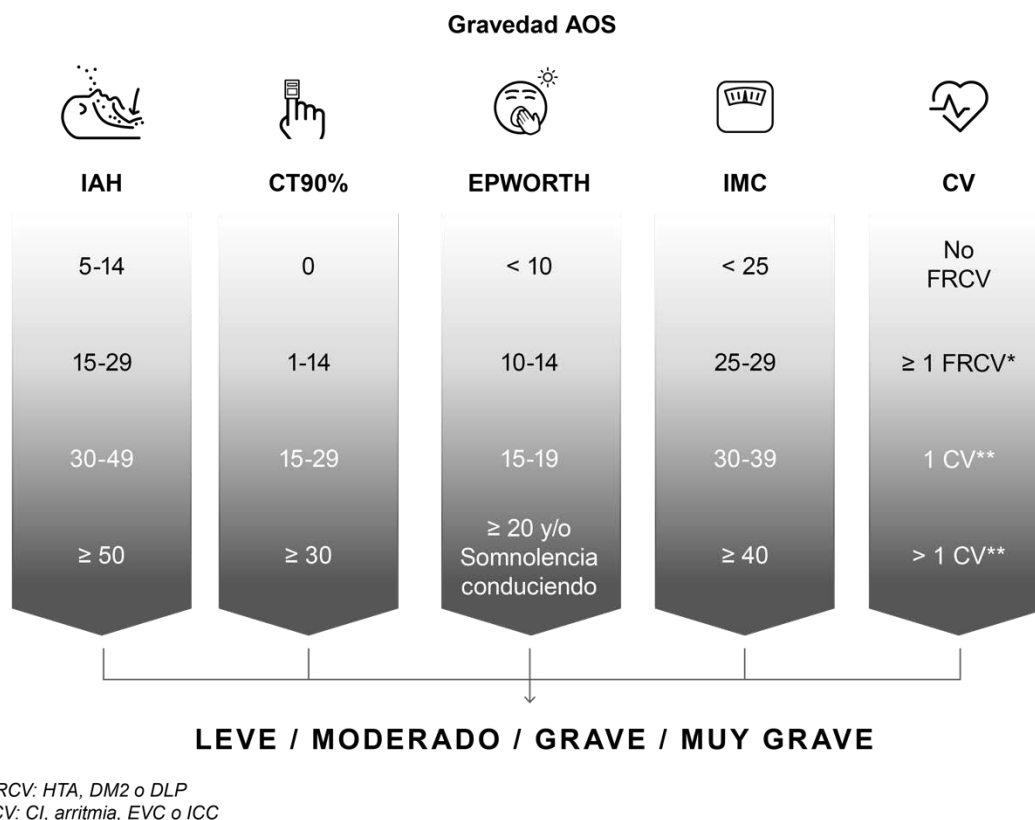

## 1.2. Fisiopatología y aspectos biológicos

La AOS se produce por el aumento de la colapsabilidad de la VAS de forma intermitente durante el sueño. Cuando el colapso es total se producen apneas y cuando es parcial, hipopneas. Estas se producen normalmente cuando hay una alteración anatómica, que es favorecida por alteraciones funcionales y reflejas de los mecanismos que intervienen en el mantenimiento de la permeabilidad de la VAS. Estos episodios obstructivos producirán hipoxia intermitente, cambios de presión intratorácica y fragmentación del sueño que, a su vez, activarán una serie de vías fisiopatológicas intermediarias que incluyen la hiperactividad del sistema simpático, la activación de las vías inflamatorias sistémicas, del estrés oxidativo, y alteraciones de diferentes hormonas reguladoras de hambre y de los ejes hipotálamo-hipofisarios. Estos mecanismos favorecerán la aparición de los efectos adversos a largo plazo de la AOS (Figura 2).

**Figura 2.** Mecanismos y efectos adversos a largo plazo implicados en la apnea obstructiva del sueño.

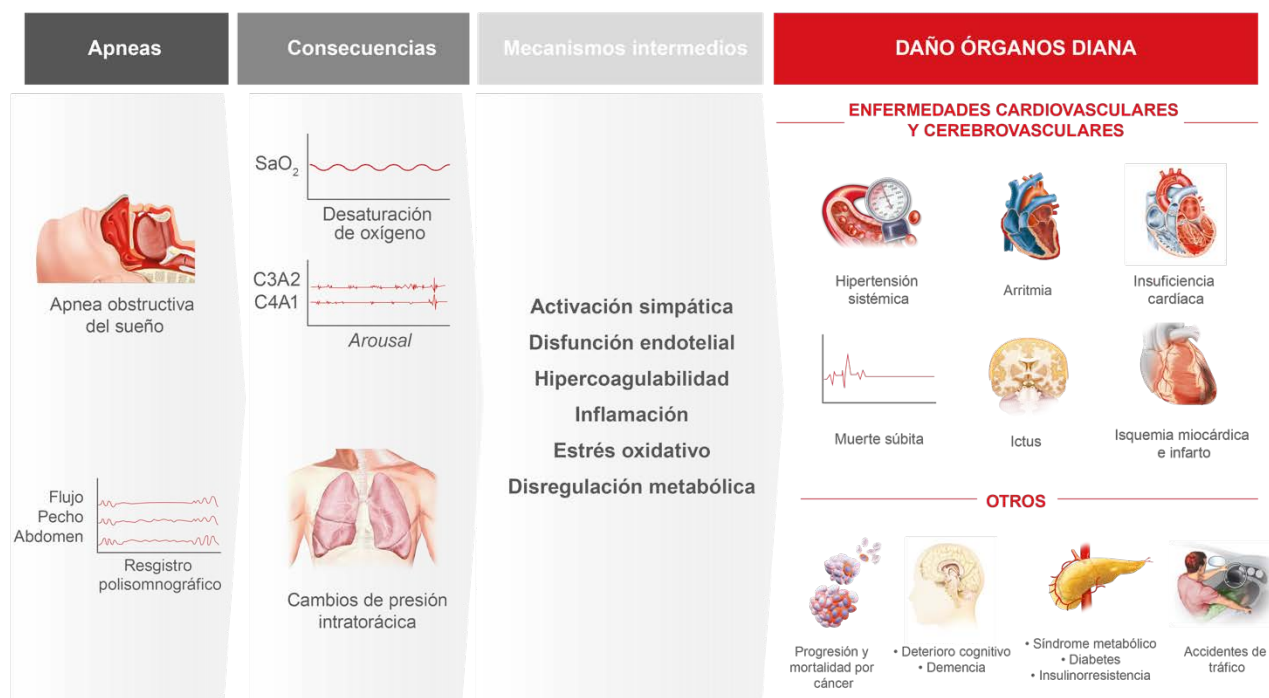

En la última década se ha avanzado en el conocimiento de la fisiopatología de la AOS, lo que ha permitido describir como mínimo 4 factores clave o fenotipos que contribuyen a su patogénesis. El incremento de la colapsabilidad de la VAS se debe principalmente al estrechamiento de la vía respiratoria superior (factor anatómico), sin embargo, el hecho de que la AOS no ocurra durante la vigilia demuestra que no es tan solo un problema anatómico. Los factores funcionales (no anatómicos) descritos comprenden una falta de eficacia de contracción de la musculatura durante el sueño (factor muscular), la inestabilidad del control respiratorio (*loop gain*) y un umbral bajo del despertar (**Figura 3**)<sup>11</sup>.

**Figura 3.** Factores implicados en la patogénesis de la apnea obstructiva del sueño. AOS: apnea obstructiva del sueño; VAS: vía aérea superior. (Adaptado de Eckert DJ <sup>11</sup>)



## Fisiopatología del AOS

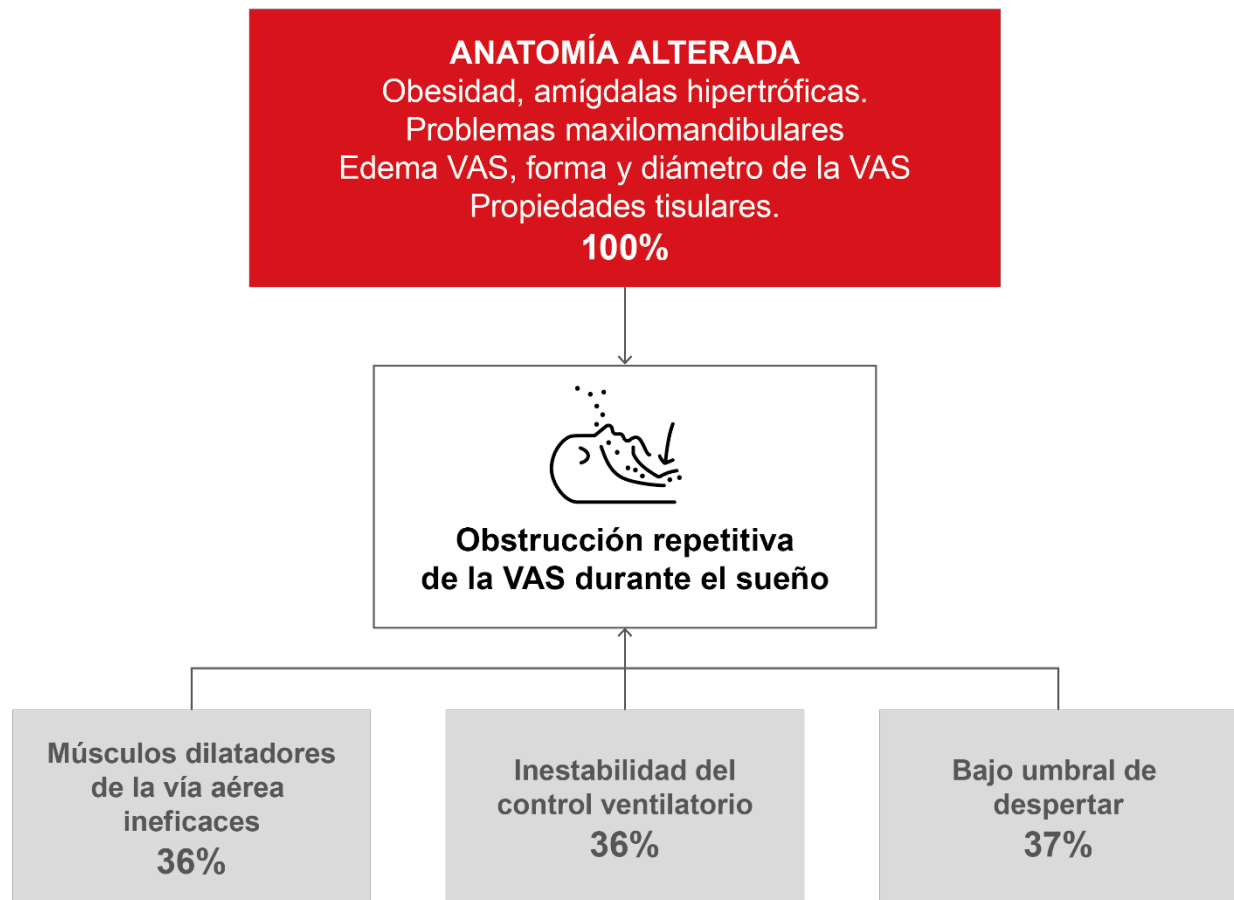

El patrón de referencia para cuantificar la alteración de la vía aérea es el cálculo de la presión tisular inductora del colapso, la denominada presión crítica de colapso (Pcrit), y está definida como la presión intraluminal mínima necesaria para mantener el segmento colapsable de la VAS abierto. La VAS normal se caracteriza por una presión crítica negativa. Esta Pcrit es más baja en sujetos normales que en roncadore, y en estos es más baja que en pacientes con AOS. El aumento de la Pcrit puede deberse a anomalías anatómicas o a las alteraciones funcionales o no anatómicas.

**Factores anatómicos:** los factores que reducen el calibre de la VAS comportan un aumento de su resistencia, generando una presión negativa faríngea durante la inspiración que predispone a su colapso. Es indudable que una anatomía de la VAS alterada es el factor clave de la AOS. Los factores anatómicos comprenden desde la obstrucción nasal, las anomalías craneofaciales (de tamaño y forma), las anomalías de la cavidad oral (macroglosia, hipertrofia amigdal, configuraciones anormales del paladar duro y blando), alteraciones de la faringe en sus tres niveles (rinofaringe, orofaringe e hipofaringe), así como alteraciones laríngeas. Además, los factores anatómicos tienen repercusión sobre los otros factores (respuesta muscular y neurológica). La micrognatia, por ejemplo, lleva la base de la lengua hacia atrás y ello interfiere en la eficacia muscular del geniogloso. La

obesidad es la principal causa de disminución del espacio faríngeo, el depósito del tejido adiposo en las regiones que rodean a la VAS reduce directamente el espacio faríngeo. Adicionalmente, se ha demostrado que depósitos grasos en lugares específicos como la lengua pueden jugar un papel importante en la colapsabilidad de la vía respiratoria. Los individuos obesos, además, suelen tener menores volúmenes pulmonares, especialmente menor capacidad residual funcional, hecho que disminuye la tracción caudal de la tráquea y predispone al colapso de la VAS y su estrechamiento. También se ha descrito en sujetos obesos depósitos de grasa entre las fibras musculares reduciendo su capacidad contráctil <sup>11</sup>.

El tamaño y la forma de la VAS también influye en el área transversal de la faringe. El menor tamaño de las estructuras craneofaciales ha demostrado ser un factor anatómico particularmente importante en pacientes con AOS de origen asiático. Adicionalmente, otros factores no anatómicos propiamente, como el edema, pueden estar implicados en la colapsabilidad de la VAS y, en consecuencia, en la aparición de episodios obstructivos <sup>11</sup>.

Factores no anatómicos: aunque el paciente prototipo con AOS es un paciente obeso roncador con una AOS grave y excesiva somnolencia durante el día, la AOS es un trastorno heterogéneo en que existen claras diferencias en la respuesta neuromuscular y ventilatoria frente a la oclusión de la vía aérea. Cuando estos se combinan con algún grado de alteración anatómica, los factores no anatómicos pueden producir la AOS e incluso modificar su gravedad. Recientes avances en el conocimiento de los múltiples mecanismos que causan la AOS abren nuevas dianas terapéuticas para un tratamiento más personalizado<sup>11</sup>.

Factor muscular: lejos de ser una estructura rígida, la permeabilidad de la VAS depende en gran medida de la actividad dilatadora de su musculatura. Dentro del factor muscular se han definido 3 elementos clave en la fisiopatología de la AOS: el control neural, la respuesta y la eficacia muscular<sup>11</sup>.

Dada su localización y participación en múltiples funciones (habla, deglución y respiración), el control neural de la musculatura es sumamente complejo. El impulso neural de estos músculos está muy influenciado por el inicio del sueño. El principal músculo dilatador de la VAS, el músculo geniogloso, tiene principalmente una activación cíclica y recibe el impulso neural del tronco cerebral, de los mecanorreceptores de la VAS y de los cambios frente a la hipoxia y a PaCO<sub>2</sub>. Del sumatorio de estos impulsos resulta la activación del geniogloso durante la inspiración, para contrarrestar la presión negativa realizada por la musculatura inspiratoria y para evitar así el colapso de la VAS. Esta actividad está muy influenciada por el inicio del sueño y cambia durante las diferentes fases del sueño (disminuye progresivamente durante N1, N2 y REM, aumenta en N3). Otros músculos como el tensor del velo del paladar tienen una actividad más tónica que disminuye al iniciarse el sueño y no es tan fase-dependiente. Aparte de la respuesta neural ante el inicio del sueño y sus diferentes fases, la musculatura faríngea puede aumentar su actividad ante cambios en la PaCO<sub>2</sub> y cambios de presión. Este concepto se refiere a la respuesta muscular. Se ha descrito que en un tercio de los pacientes con AOS no aumentan la actividad muscular frente a la obstrucción. Finalmente, la eficacia muscular es la habilidad de convertir el impulso neural recibido por los músculos dilatadores de la vía aérea en una contracción que incrementará el flujo en respuesta a un episodio obstructivo. Se ha demostrado que incluso en los pacientes con AOS existen diferentes patrones de eficacia muscular: mientras algunos tienen un incremento adecuado de la actividad muscular frente a la obstrucción (buena respuesta muscular) y una buena eficacia en la dilatación de la VAS, otros demuestran una baja respuesta muscular frente a la obstrucción y, por tanto, no consiguen abrir la VAS (baja eficacia

muscular). Adicionalmente, hay pacientes que a pesar de tener una buena respuesta muscular esta no se traduce en la dilatación de la VAS y, por tanto, tienen una baja eficacia muscular<sup>11</sup>.

Control respiratorio (*loop gain, LG*): tras un episodio obstructivo existe una hiperventilación de una amplitud variable que depende del individuo. Una elevada respuesta a la hipoxia y la hipercapnia secundarias a la apnea, por una hipersensibilidad de los quimiorreceptores, dará lugar a hiperventilación, disminución de la PaCO<sub>2</sub> y disminución el impulso eferente de los centros respiratorios, favoreciendo la colapsabilidad y por tanto la aparición de nuevas apneas obstructivas. Alternativamente, la hiperventilación postapnea puede conducir al descenso de la PaCO<sub>2</sub> y favorecer apneas centrales, lo que explica la coexistencia de episodios obstructivos y centrales en un mismo paciente<sup>11</sup>.

La sensibilidad del centro respiratorio se puede cuantificar como el aumento de la ventilación en respuesta a una alteración y vuelta a la homeostasis (*loop gain*). Por tanto, un LG elevado se considera un aspecto negativo sobre la colapsabilidad de la AOS, mientras que un LG bajo al estabilizar la respiración, puede prevenir el colapso de la VAS y, por tanto, se considera positivo. Se considera que un tercio de los pacientes con AOS tienen un LG aumentado, y al igual que el concepto de disminución de la eficacia muscular puede tener especial importancia en los pacientes con AOS leve-moderado<sup>11</sup>.

Umbral de despertar: las apneas causan un despertar transitorio o *arousal* que produce la característica fragmentación del sueño, pero favorece la apertura del VAS por la activación muscular. Pero lo que se ha considerado hasta ahora un efecto protector, ha demostrado que puede tener un efecto nocivo sobre el AOS. El despertar produce una hiperventilación que puede favorecer la inestabilidad ventilatoria y, entonces, favorecer el colapso. Cada individuo tiene un umbral de *arousal* diferente y que puede cambiar según la fase del sueño. Normalmente la fase N3 tiene un umbral alto de despertar, lo que va a implicar poca variabilidad respiratoria y, como se ha explicado, mayor activación de la musculatura de la VAS, y es por tanto una fase en que se producen menos episodios obstructivos. Por tanto, en general un nivel de “arousabilidad” alto se considera protector de la permeabilidad de la VAS<sup>11</sup>.

## **2. Manifestaciones clínicas, exploración física y exploraciones complementarias**

Manifestaciones clínicas. El cuadro clínico de la AOS puede ser muy sugestivo, aunque en algunos casos puede ser más inespecífico, y hoy en día conocemos fenotipos clínicos diferentes al clásico que se abordarán en profundidad en el siguiente apartado. El diagnóstico siempre deberá confirmarse con un estudio de sueño, ya que no hay ningún síntoma clínico ni signo que sea patognomónico. El cuadro clásico de presentación es un varón de edad media, con sobrepeso u obesidad, que se ha incrementado en los años previos, que manifiesta ronquido intenso, con apneas observadas, somnolencia diurna y que presenta, además, consecuencias cardiovasculares y metabólicas, como HTA. Pero hay muchos otros síntomas y, por otro lado, las manifestaciones pueden ser diferentes en grupos concretos, como mujeres, ancianos u otros. La tríada típica consiste en ronquido, apneas observadas e hipersomnolencia diurna. El ronquido está prácticamente siempre presente, pero no es un síntoma específico, ya que muchos hombres a partir de los 40 años y mujeres posmenopáusicas roncan sin padecer AOS. En la AOS, el ronquido suele ser fuerte y entrecortado por las apneas. Las apneas observadas por el compañero/a de habitación son mucho más

específicas, aunque lo que no predicen es la gravedad del cuadro. La información del compañero de habitación es muy útil en la evaluación inicial de los síntomas, tanto nocturnos como diurnos, ya que en muchas ocasiones los síntomas diurnos son percibidos de manera diferente por el propio paciente que por la familia. Otros síntomas nocturnos (Tabla 4) característicos son la nicturia, el sueño intranquilo y, menos frecuentemente, los despertares asfícticos (*choking*), la sudoración profusa, el sueño agitado y las pesadillas. En ocasiones, en los casos graves, la sintomatología nocturna es tan florida que el cuadro puede hacer sospechar que se trata de un trastorno de conducta del sueño REM (TCSREM): el paciente se mueve, da manotazos, chilla, habla, se cae de la cama, etc. Si planteamos más preguntas sobre dichos episodios, los entrevistados coinciden en que los movimientos son más fuertes al final de las apneas y se repiten a lo largo de toda la noche, en vez de predominar en el último tercio (TCSREM típicamente), pero el diagnóstico final nos lo dará la polisomnografía (PSG). El síntoma diurno más frecuente y más relevante es la ESD o hipersomnolencia, que es un factor fundamental en la indicación del tratamiento. La ESD se produce como consecuencia de la repetición durante el sueño del ciclo: apnea-hipopnea, cambios gasométricos, despertar transitorio y final de la apnea-hipopnea. Los microdespertares repetidos son responsables de la fragmentación del sueño y la consecuente reducción en las fases de sueño profundo y REM. El sueño pierde, por tanto, su capacidad restaurativa, y surge la somnolencia y las alteraciones en el nivel de vigilancia. Es un síntoma que progresa lentamente, y ello determina que muchos pacientes no sean conscientes del mismo hasta que están severamente afectados. Muchos pacientes, antes que somnolencia, presentan falta de energía, cansancio o fatiga, síntomas derivados también del mal descanso. Es frecuente que el paciente subestime su grado de ESD. No es infrecuente que, cuando consultan, hayan tenido accidentes de tráfico o «sustos» (casi accidentes) conduciendo. Otros síntomas diurnos son: falta de concentración, déficits de memoria, irritabilidad, malhumor, cansancio físico matutino, cefalea matutina y síntomas depresivos, como apatía y falta de energía.

**Tabla 4.** Resumen de los principales síntomas de la AOS.

| Síntomas nocturnos                    | Síntomas diurnos                     |
|---------------------------------------|--------------------------------------|
| Ronquidos                             | Excesiva somnolencia diurna          |
| Apneas observadas                     | Sensación de sueño no reparador      |
| Episodios asfícticos                  | Cansancio crónico                    |
| Movimientos anormales                 | Cefalea matutina                     |
| Diaforesis                            | Irritabilidad                        |
| Despertares frecuentes                | Apatía                               |
| Nicturia (adultos) y enuresis (niños) | Depresión                            |
| Pesadillas                            | Dificultades de concentración        |
| Sueño agitado                         | Pérdida de memoria                   |
| Insomnio                              | Disminución de la libido, impotencia |
| Reflujo gastroesofágico               |                                      |

Diagnóstico diferencial de la excesiva somnolencia diurna. En nuestra sociedad occidental la causa más habitual de la ESD es la privación crónica de sueño o síndrome de sueño insuficiente, por lo que siempre hay que preguntar por los horarios de sueño habituales. Otros procesos que causan ESD, por los que nunca hay que dejar de interesarse, son el trabajo por turnos, la toma de fármacos sedantes, diferentes entidades médicas que producen dolor crónico y la mala calidad del sueño, y trastornos primarios del sueño, como la narcolepsia, el síndrome de las piernas inquietas, la hipersomnia idiopática o las alteraciones del ritmo circadiano.

La **tabla 5** muestra dos formas diferentes para valorar el grado de somnolencia. Una pregunta muy fácil para estimar su gravedad es conocer si la somnolencia afecta o no a su actividad laboral, social (de un modo pasivo, cuando se relajan, o activo, aún en actividad) o cuando conduce.

**Tabla 5.** Escalas para medir la somnolencia diurna excesiva.

| <b>Gradación de la excesiva somnolencia diurna (ESD)</b>                                                                                                                                                                                                                                                                                                                                                                                                                                                                                                                                                                                                       | <b>Escala de somnolencia de Epworth (EE)</b>                                                                                                                                                                                                                                                                                                                                                                                                                                                                                                                                                                                                                                      |
|----------------------------------------------------------------------------------------------------------------------------------------------------------------------------------------------------------------------------------------------------------------------------------------------------------------------------------------------------------------------------------------------------------------------------------------------------------------------------------------------------------------------------------------------------------------------------------------------------------------------------------------------------------------|-----------------------------------------------------------------------------------------------------------------------------------------------------------------------------------------------------------------------------------------------------------------------------------------------------------------------------------------------------------------------------------------------------------------------------------------------------------------------------------------------------------------------------------------------------------------------------------------------------------------------------------------------------------------------------------|
| <p><b>1. No hay ESD</b></p> <p><b>2. Leve:</b> episodios infrecuentes de ESD que ocurren en situaciones pasivas (viendo la televisión, leyendo, viajando como pasajero). Generan escasa repercusión sobre las actividades de la vida diaria</p> <p><b>3. Moderada:</b> episodios de ESD que suceden regularmente en situaciones que requieren cierto grado de atención (conciertos, teatros, reuniones). Producen cierto impacto en las actividades de la vida diaria</p> <p><b>4. Grave:</b> episodios de ESD diarios en situaciones francamente activas (p. ej., hablando, comiendo, paseando). Alteran de forma considerable las actividades habituales</p> | <p><b>1.</b> Sentado, leyendo</p> <p><b>2.</b> Viendo la televisión</p> <p><b>3.</b> Sentado, inactivo en un lugar público</p> <p><b>4.</b> Como pasajero en un coche durante 1 h seguida</p> <p><b>5.</b> Descansando, echado por la tarde cuando las circunstancias lo permiten</p> <p><b>6.</b> Sentado, charlando con alguien</p> <p><b>7.</b> Sentado tranquilamente después de una comida sin alcohol</p> <p><b>8.</b> En un coche, al pararse unos minutos en el tráfico</p> <p>0 puntos: nunca se adormilaría; 1 punto: pocas posibilidades de que se adormile; 2 puntos: es posible que se adormile; 3 puntos: muchas posibilidades de adormilarse (puntuación 0-24)</p> |

Exploración física. No hay ningún signo en la exploración física que resulte patognomónico. Sin embargo, además de una exploración física general, existen algunos aspectos que nos van a sugerir la presencia de una AOS. La mayoría de los pacientes son obesos, sobre todo de predominio central, con aumento del perímetro abdominal (> 102 cm hombres, > 88 cm mujeres) y también del perímetro cervical. Un perímetro cervical de más de 40 se asocia a AOS. Los pacientes, en general, tienen una VAS más pequeña, pueden presentar macroglosia y también, en ocasiones, una hipertrofia amigdalar, paladar ojival, obstrucción nasal y alteraciones craneofaciales, como retrognatía o micrognatía, que predisponen al estrechamiento de la VAS y, por tanto, a padecer una AOS al condicionar un desplazamiento posterior de la base de la lengua.

La exploración de la VAS es importante no solo para ayudar en el grado de sospecha clínica, sino para evaluar al paciente de una forma más personalizada y orientar a diferentes tratamientos además de la presión positiva continua en las vías respiratorias (CPAP), y también prever problemas de tolerancia a la CPAP. Por tanto, debe incluirse en toda valoración de un paciente con sospecha de AOS. La exploración mínima por el especialista no ORL debería incluir un examen de las fosas nasales y de la orofaringe. La valoración recomendada para la orofaringe es siguiendo la clasificación de Friedman (*Friedman tongue position*) o Mallampati modificado (Figura 4)<sup>12</sup>. La exploración mediante estos criterios tiene una correlación positiva, aunque pequeña, con la presencia y severidad de la AOS. También se recomienda la valoración del tamaño de las amígdalas mediante la clasificación de Friedman del tamaño amigdalario (Figura 5) como orientación a una posible cirugía amigdalario<sup>12</sup>. El cuestionario NOSE<sup>13</sup> puede ayudar en la valoración nasal.

**Figura 4.** Posición de la lengua según Friedman o Mallampati modificado. Se realiza con el paciente sentado, en reposo, con la lengua dentro de la cavidad bucal. Se valora la posición del paladar respecto a la base de la lengua.

Posición del paladar:

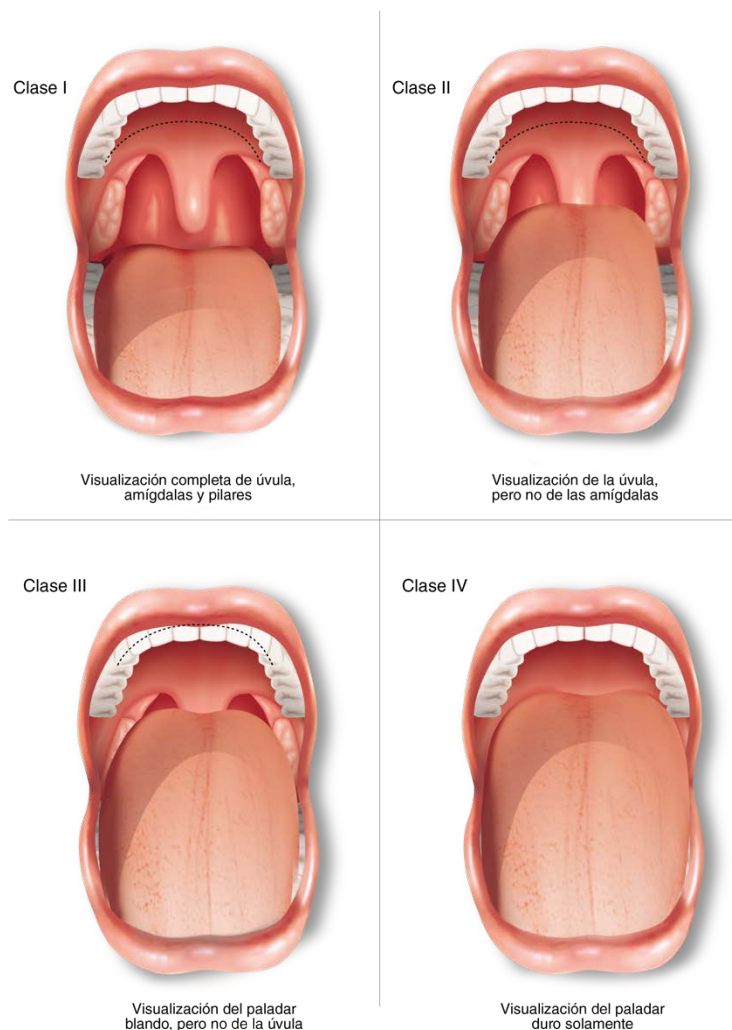

**Figura 5.** Clasificación de Friedman del tamaño amigdalario.

Tamaño amigdalario:



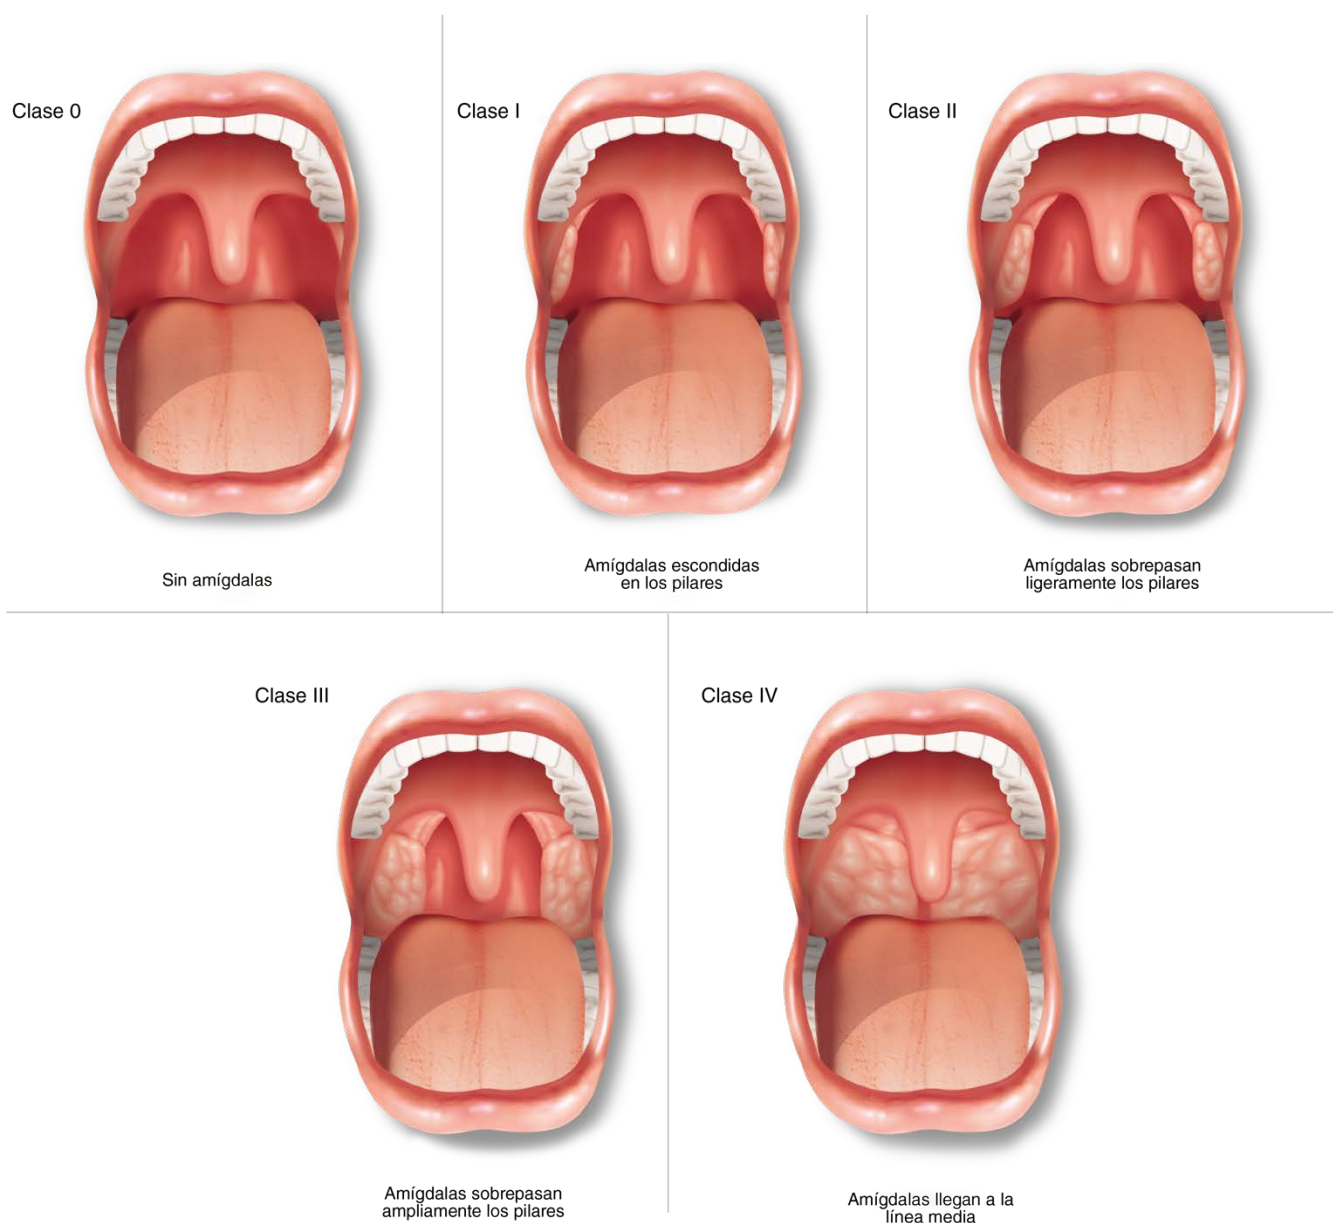

La exploración dental y oclusal puede orientar a anomalías estructurales óseas que podrían contribuir a la AOS, así como la evaluación del perfil facial<sup>12</sup> (Figura 6).

**Figura 6.** Evaluación del perfil facial.

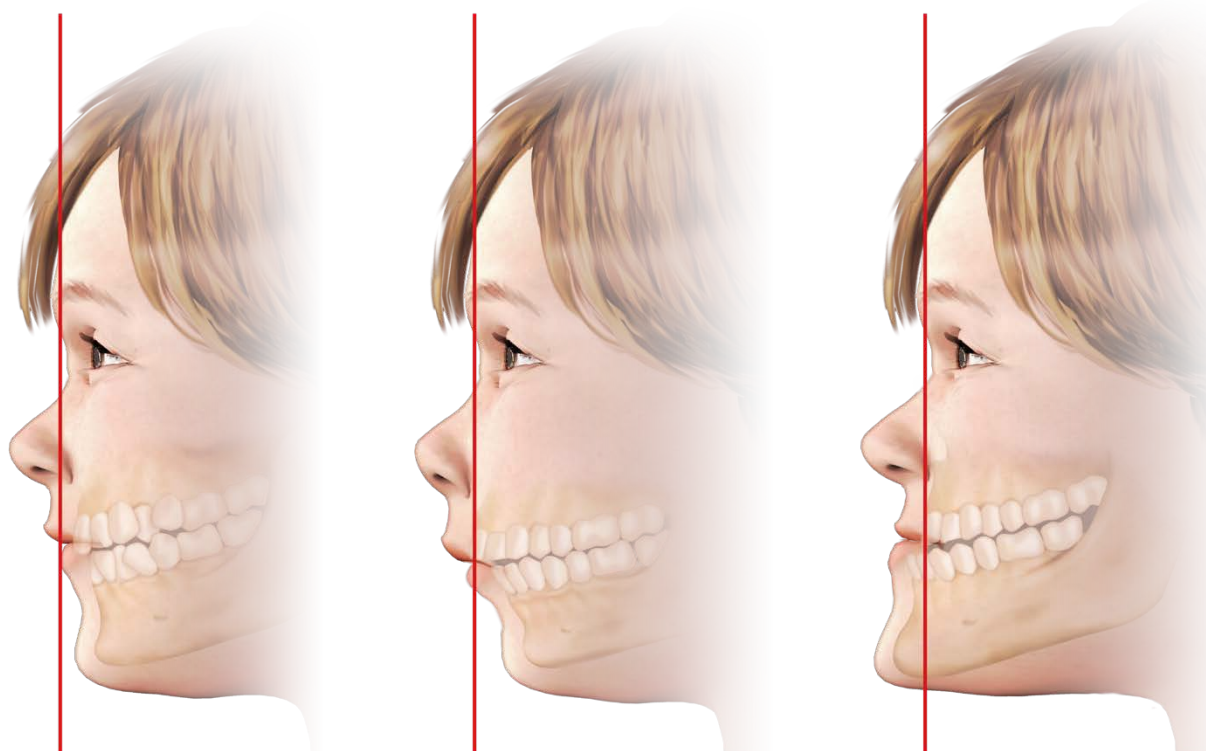

Perfil facial  
recto

Perfil facial  
retrognata

Perfil facial  
prognata

Para la valoración de tratamientos alternativos a CPAP, cirugía y dispositivos de avance mandibular (DAM) la exploración de la VAS la deberá hacer un especialista en ORL. Además de la exploración nasal y de la faringe y la maniobra de Müller, una de las exploraciones más en boga hoy en día es la endoscopia con sueño inducido (DISE, *drug induced sleep endoscopy*)<sup>14</sup>, que consigue una reproducción de los niveles de obstrucción de la VAS más aproximada al sueño que la exploración en vigilia. Parece ser un buen predictor para el éxito de cirugía de partes blandas o de estimulación del hipogloso. También para el éxito de las DAM, aunque en este caso no está claro que sea coste-efectiva. Por este motivo este DIC recomienda una exploración por parte del especialista de ORL cuando este puede beneficiarse de un tratamiento alternativo para la AOS (cirugía, DAM, estimuladores del nervio hipogloso, etc.), especialmente relevantes en el paciente no obeso.

Exploraciones complementarias (Tabla 6). La realización de exploraciones complementarias en los pacientes con sospecha de AOS, o AOS ya diagnosticada, va encaminada a valorar las posibles consecuencias de la enfermedad y las comorbilidades que puedan agravar las mismas. Esto es relevante, ya que puede condicionar un alto gasto, dado el elevado número de pacientes con sospecha de AOS, especialmente en medicina primaria.

No hay guías clínicas que recomienden las exploraciones que deben realizarse ni literatura específica en este sentido, puesto que en el documento de consenso del año 2005 las recomendaciones fueron con base en el consenso de los autores<sup>2</sup>. En este documento se han actualizado según la nueva evidencia científica cuando ha sido posible y por consenso de los autores.

**Tabla 6.** Exploraciones complementarias recomendadas por el DIC para pacientes con sospecha o diagnosticados de AOS. CT 90%: tiempo acumulado con saturación de oxihemoglobina por debajo del 90%; HbA1c: hemoglobina glucosilada; HTP: hipertensión pulmonar; IMC: índice de masa corporal; SHO: síndrome de hipoventilación y obesidad.

| Exploración                                               | Cuando solicitarla                                                                                                                                             |
|-----------------------------------------------------------|----------------------------------------------------------------------------------------------------------------------------------------------------------------|
| Hemograma, bioquímica general con perfil lipídico y HbA1c | Siempre                                                                                                                                                        |
| TSH                                                       | Sospecha clínica de enfermedad tiroidea o en tratamiento por esta enfermedad que no tengan un control reciente                                                 |
| Espirometría                                              | Solo en pacientes fumadores o ex fumadores, o con clínica respiratoria, sujetos con obesidad mórbida ( $IMC \geq 40$ ), y pacientes con comorbilidad relevante |
| SpO <sub>2</sub> , pulsioximetría (medición puntual)      | Siempre                                                                                                                                                        |
| Bicarbonato sérico                                        | $IMC \geq 30 \text{ kg/m}^2$                                                                                                                                   |
| Gasometría                                                | Si bicarbonato $\geq 27 \text{ mmol/l}$ , alta sospecha clínica de SHO o CT 90% elevado no justificable por los episodios respiratorios                        |
| Radiografía de tórax                                      | Sospecha de enfermedad cardíaca o respiratoria                                                                                                                 |
| Electrocardiograma                                        | Sospecha enfermedad cardíaca                                                                                                                                   |
| Ecocardiografía                                           | Sospecha insuficiencia cardíaca o HTP                                                                                                                          |

**Analítica.** En los últimos 15 años la búsqueda de biomarcadores que puedan utilizarse para el despistaje de la enfermedad y también como marcadores del riesgo para las consecuencias cardiovasculares ha sido muy intensa. Sin embargo, hasta el momento ningún biomarcador se ha demostrado útil para ello<sup>15</sup>. De entre los diferentes marcadores, la PCR es uno de los que destaca como posible marcador de riesgo cardiovascular, pero no hay todavía suficiente evidencia para recomendarlo de forma sistemática<sup>16</sup>.

Sí hay evidencia en cuanto a las consecuencias metabólicas del SAOS, por lo que a las recomendaciones del 2005 se añade la recomendación de la realización de hemoglobina glucosilada, para una mejor valoración de las consecuencias metabólicas.

En cuanto a la determinación de hormonas tiroideas, diversos trabajos han puesto de manifiesto que el hipotiroidismo clínico tiene una prevalencia baja en los pacientes con AOS (0,4-2%) y, en cambio, el hipotiroidismo subclínico tiene una prevalencia de entre el 8% y 11,5%, más elevado de lo que las series más antiguas habían detectado. Sin embargo, dado que no queda claro el beneficio que aportaría tratar el hipotiroidismo subclínico, hay disparidad de opiniones en cuanto a la determinación sistemática de tirotropina (TSH) en todos los pacientes con AOS. Este documento de consenso no recomienda pedir de manera sistemática la determinación de TSH y restringir su solicitud a pacientes con sospecha de enfermedad clínica tiroidea, o en tratamiento por esta enfermedad que no tengan un control reciente<sup>17</sup>.

Así pues, se recomienda la realización de un hemograma y bioquímica general que incluya el perfil lipídico y hemoglobina glucosilada.

**Pruebas de función respiratoria.** No hay nueva evidencia científica de su utilidad en el manejo diagnóstico de la AOS. Por tanto, se recomienda la realización de una espirometría según el sentido clínico con el objeto de detectar comorbilidad respiratoria que pueda agravar la condición del paciente. Como norma general, se recomienda la realización de una espirometría sistemática solo en pacientes fumadores o ex fumadores, o con clínica respiratoria, sujetos con obesidad mórbida ( $IMC \geq 40$ ) y con comorbilidad relevante.

Saturación arterial diurna/gasometría: no está establecido cuándo deben realizarse. Este DIC recomienda la determinación puntual de  $SPO_2$  por pulsioximetría a todos los pacientes, dada la amplia disponibilidad habitual de pulsioxímetros en las consultas, como despistaje de comorbilidad respiratoria. La gasometría debería realizarse únicamente cuando exista sospecha de síndrome de hipoventilación obesidad (SHO). Recientes recomendaciones de la ATS<sup>18</sup> sugieren la realización de gasometría para confirmar este síndrome cuando existe alta sospecha clínica (obesidad severa con síntomas típicos de hipoventilación e hipoxemia leve en vigilia, hipoxemia durante la noche, o ambas). En los casos con sospecha moderada (en general pacientes con  $IMC$  de 30-40  $kg/m^2$ ) la determinación de bicarbonato sérico puede ser de ayuda: si el bicarbonato es  $\geq 27$  mmol/l apoya la existencia de hipercapnia y debería realizarse entonces la gasometría. Este DIC recomienda la realización de una gasometría en caso de presentar bicarbonato sérico  $\geq 27$  mmol/l, una elevada sospecha clínica de SHO o un CT 90% elevado no justificable por los episodios respiratorios

**Radiografía.** Se pide solo ante la sospecha de enfermedad cardíaca o respiratoria (tórax). No se piden de manera sistemática la cefalometría y el Waters, ni una radiografía lateral de cráneo en adultos. Este DIC mantiene la misma recomendación.

**Electrocardiograma.** En el anterior documento se recomendaba realizarlo por consenso ante la sospecha de enfermedad cardíaca o HTA<sup>2</sup>. Estudios recientes han encontrado que diversos parámetros electrocardiográficos parecen buenos marcadores de riesgo cardiovascular en pacientes con AOS, concretamente marcadores que indican disfunción de la aurícula izquierda, implican riesgo de fibrilación auricular y que se han asociado a la existencia de AOS grave especialmente en pacientes jóvenes<sup>19</sup>. Si estos hallazgos se confirman en estudios más amplios, debería incluirse su realización en todos los pacientes con AOS, especialmente en los graves y jóvenes.

**Ecocardiografía transtorácica.** Consenso anterior: la Sociedad Española de Cardiología, dada la prevalencia de HTA, miocardiopatía dilatada, hipertensión pulmonar y enfermedad isquémica en la AOS grave, estimaba aconsejable incluir un estudio ecocardiográfico en la evaluación clínica de este tipo de pacientes <sup>2</sup>.

Actualmente no es realista llevar a cabo la ecocardiografía a todos los pacientes con AOS, por lo que mientras no haya evidencia científica de en qué pacientes su realización puede aportar implicaciones terapéuticas, este consenso recomienda hacerla en los pacientes en que se sospeche insuficiencia cardíaca o hipertensión pulmonar.

### 3. Fenotipos de la apnea obstructiva del sueño

Tal y como se ha mencionado en este consenso, la AOS es una enfermedad prevalente, compleja y heterogénea cada vez más reconocida y diagnosticada. Esta elevada heterogeneidad está presente en su fisiopatología, su presentación clínica, pero también en la comorbilidad a la que se asocia, su evolución clínica y la respuesta al tratamiento elegido. A pesar de esta heterogeneidad, el diagnóstico, la valoración de la gravedad y las decisiones terapéuticas se han basado hasta el momento fundamentalmente en el IAH. Los avances en las últimas décadas nos han proporcionado conocimiento sobre los mecanismos genéticos y biomoleculares, y disponemos de datos de grandes estudios de cohortes y estudios controlados aleatorizados que han explorado la respuesta al tratamiento. Paralelamente contamos con sofisticadas técnicas estadísticas (supervisadas o no) que han permitido analizar grandes cantidades de datos (análisis por grupos, entre otros), lo que ha permitido explorar nuevas hipótesis para caracterizar mejor la enfermedad. Estos avances han hecho posible clasificar esta enfermedad en pequeñas categorías, a las que nos referimos como fenotipos, que pueden estar basadas en datos clínicos, fisiopatológicos, celulares y moleculares. Ello nos permite mejorar el conocimiento sobre los mecanismos que producen la enfermedad, prediciendo mejor la respuesta al tratamiento y el riesgo a desarrollar efectos adversos a largo plazo, con la finalidad de llevar a cabo una medicina más personalizada para nuestros pacientes con AOS<sup>20</sup>.

Un claro ejemplo de la aplicación de la clasificación por fenotipos es la planteada por Eckert y cols.<sup>11</sup>, que han descrito la escala PALM (Pcrit, umbral de *arousal*, *loop gain*, respuesta muscular) para estratificar a los pacientes con AOS en función de los diferentes rasgos fisiopatológicos, ya descritos en la sección de fisiopatología de la VAS. En función de esta clasificación, los pacientes con una AOS grave-moderada con una clasificación PALM 1 o 2a, en los que predomina una alteración anatómica, se les indicaría un tratamiento con CPAP o alguna alternativa terapéutica encaminada a modificar la VAS (prótesis de avance mandibular, cambios de estilo de vida, cirugía, etc.). A medida que los factores no anatómicos tienen mayor peso, se plantean tratamientos dirigidos a tratar cada uno de los rasgos fisiopatológicos o la combinación de ellos: estimulación de la musculatura de la VAS para mejorar la función muscular, acetazolamida para reducir la respuesta ventilatoria o hipnóticos para aumentar el umbral de despertar<sup>11</sup>. Aunque este sistema integrativo no está estandarizado para su uso habitual, en los estudios iniciales ha demostrado tener una buena sensibilidad y especificidad para clasificar a los pacientes y predecir su respuesta al tratamiento.

La búsqueda de diferentes presentaciones clínicas de la AOS se basó inicialmente en características clínicas de la enfermedad que se combinaban con datos antropométricos, datos del sueño y comorbilidades, dando patrones que correspondían a las presentaciones clínicas más comunes de la AOS<sup>21</sup>. De hecho, uno de los primeros fenotipos descritos fue el de los pacientes con ESD.



Estudios epidemiológicos han demostrado que los pacientes con ESD tienen mayor incidencia de hipertensión, alteraciones del metabolismo glucídico y mayor mortalidad, por lo que la mejoría de la somnolencia es una diana terapéutica para todos los tratamientos. De hecho, la mejoría de la somnolencia se ha asociado también a mejoría de la hipertensión, del riesgo cardiovascular y de la calidad de vida. La edad, el género y la etnia han demostrado también tener importantes implicaciones en la presentación de la AOS. En las personas mayores la AOS se asocia a menos somnolencia y, en cambio, puede presentarse como alteraciones cognitivas y del estado de ánimo. Pero paralelamente se ha visto que la asociación de la AOS con la hipertensión o la fibrilación auricular se pierde en los pacientes de mayor edad. Existen, por el contrario, resultados controvertidos sobre el aumento del riesgo de muerte, de enfermedad coronaria o el de padecer alteraciones cognitivas. Otro fenotipo ampliamente estudiado es la AOS en mujeres, que se describirá ampliamente en la próxima sección.

La PSG también aporta datos que pueden definir nuevos fenotipos<sup>21,22</sup>. De hecho, se ha descrito que más del 50% de los pacientes tiene una AOS posicional. Los pacientes con una AOS que predomina en supino suelen ser más jóvenes, con menor IMC y menor IAH al compararlos con pacientes con AOS no posicional. Un hecho consistente es la disminución de la Pcrit en la posición lateral. Es probable que la causa sea una combinación de una anatomía desfavorable de la VAS, lo que aumenta la colapsabilidad, con la disminución del volumen corriente, junto con la falta de respuesta de la musculatura dilatadora de la VAS para compensarlo. A pesar de la elevada prevalencia y de su plausibilidad fisiopatológica, está por definir si este hecho puede determinar la respuesta al tratamiento. Existen resultados contradictorios en cuanto a la respuesta de la AOS posicional a los DAM o la necesidad de tratamientos con CPAP a presiones variables. En los últimos años se han desarrollado nuevos dispositivos que han demostrado reducir el tiempo que el paciente pasa en supino, pero de momento no disponemos de resultados a largo plazo. Aparte de la posición, la AOS de predominio en REM ha emergido como un fenotipo polisomnográfico que puede tener su importancia dado los resultados recientes que la relacionan con el aumento del riesgo cardiovascular. Datos de la cohorte de Wisconsin han asociado tener un IAH  $\geq 15$  en REM con el aumento de la prevalencia e incidencia de hipertensión, que no se daba en la AOS no-REM. Posteriormente, el *Sleep Health Heart Study* reveló que, en pacientes con enfermedad cardiovascular prevalente al inicio del estudio, la AOS grave en REM (IAH en REM  $\geq 30$ ) se asociaba a aumento del riesgo cardiovascular (objetivo compuesto por episodios cardiovasculares fatales y no fatales). Los pacientes con AOS en REM son más frecuentemente mujeres jóvenes con una menor eficiencia de sueño. La disminución de actividad del músculo geniogloso, la disminución del impulso ventilatorio, la mayor duración de los episodios con una hipoxia más severa y el aumento de la actividad simpática podrían estar relacionados con una mayor toxicidad cardiometabólica<sup>21</sup>.

Recientemente el análisis de grupos o *clústers* se ha aplicado a la definición de fenotipos con grandes series de datos. A diferencia de los estudios con una hipótesis *a priori*, el análisis por grupos es una técnica con una sofisticada metodología que combina diferentes variables para identificar grupos de pacientes con distintos fenotipos. Cabe destacar que los resultados de estos estudios son muy variables y dependen en gran medida de las variables incluidas en los análisis y las poblaciones estudiadas. Uno de los primeros análisis por grupos fue el publicado por el *Icelandic Sleep Apnea Cohort* (ISAC) Research Group y cols.<sup>22</sup> en más de 800 pacientes consecutivos con una AOS moderada-grave. Identificaron 3 fenotipos principales: los pacientes con alteraciones durante el sueño, los pacientes mínimamente sintomáticos y los pacientes con ESD. Este estudio demostró que estos grupos a pesar de tener similares características en cuanto a IAH, género o grado de obesidad, a menudo no tenían somnolencia y que los pacientes mínimamente sintomáticos tenían más



comorbilidad. Estos resultados fueron concordantes con los de la cohorte ESADA y otros estudios posteriores, en que concluyeron que el insomnio en pacientes con AOS era un síntoma frecuente y se asociaba a una mayor comorbilidad psiquiátrica y cardiovascular, así como a un menor cumplimiento del tratamiento con CPAP<sup>22</sup>. A medida que los resultados de sucesivos estudios se han ido publicando, se han definido distintos fenotipos clínicos que se pueden resumir a grandes rasgos en los siguientes: Pacientes ESD jóvenes con AOS grave o fenotipo clásico, pacientes AOS con comorbilidad mínimamente sintomáticos (en algún estudio este grupo incluye el subgrupo de gente mayor), pacientes con síntomas de insomnio o sueño alterado con predominio femenino y pacientes jóvenes con AOS poco sintomáticos (ver descripción en tabla 7). De cara a la práctica clínica habitual, estos fenotipos pueden ayudar a identificar pacientes que hasta ahora habrían pasado desapercibidos y a su vez establecer estrategias terapéuticas más personalizadas<sup>21-23</sup>.

Otros estudios se han encaminado a predecir la respuesta al tratamiento. Se han descrito hasta 5 grupos de cumplimiento del tratamiento con CPAP, siendo los mejor cumplidores los que incluían pacientes más graves y sintomáticos, y los menos cumplidores los grupos de pacientes mínimamente sintomáticos y con más comorbilidad. En diferentes estudios los pacientes con síntomas de insomnio se han asociado a menor cumplimiento de la CPAP.<sup>22</sup> Otros trabajos, han clasificado a los pacientes según diferentes patrones de cumplimiento: desde el paciente cumplidor sin variaciones a lo largo del tiempo, hasta el mal cumplidor con un cumplimiento descendente.<sup>22</sup> La importancia de estos resultados radica en la posibilidad de identificar grupos de pacientes en los que una intervención puede mejorar el cumplimiento. Otro aspecto crucial es la posibilidad de predecir con los fenotipos el curso de la enfermedad. Recientemente, un subanálisis del estudio SAVE<sup>24</sup> identificó 4 fenotipos de pacientes, siendo los pacientes con diabetes frente a los fenotipos que no la presentaban los que tenían mayor riesgo de sufrir efectos cardiovasculares adversos. Al estudiar la respuesta al tratamiento, la CPAP solo demostró un efecto protector sobre nuevos episodios cardiovasculares en pacientes diabéticos con AOS con una adherencia a la CPAP de al menos 4 h/noche en los primeros 2 años del estudio. Recientemente, Zinchuk y cols.<sup>25</sup> pusieron en relieve la importancia de introducir otros datos procedentes de la PSG en los análisis por grupos para definir fenotipos de AOS. Este estudio identificó hasta 6 fenotipos según variables polisomnográficas, 3 de los cuales (fenotipos con movimientos periódicos de piernas, con hipopnea e hipoxia y AOS severa con hipoxia) demostraron un aumento del riesgo cardiovascular que no pudo demostrarse con la clasificación tradicional del IAH<sup>25</sup>.

En conclusión, existe evidencia para demostrar que el IAH es insuficiente para el diagnóstico y manejo de la AOS. Hay que seguir investigando en la caracterización de fenotipos que no solo estén basados en datos clínicos y fisiopatológicos, sino que utilicen datos de diferentes niveles (clínicos, fisiopatológicos, genómicos, moleculares, “ómnicos”, etc.) que estén encaminados a predecir las consecuencias a corto y largo plazo y las respuestas a los diferentes tratamientos. La identificación de fenotipos y su validación en un futuro próximo va a permitir realizar una medicina más precisa y personalizada para la AOS. En la **tabla 7** se resumen los principales fenotipos de la AOS definidos en la actualidad.

**Tabla 7.** Principales fenotipos en la AOS. ESD: excesiva somnolencia diurna; IAH: índice de apnea-hipopnea; IMC: índice de masa corporal; CPAP: presión positiva continua en vía aérea superior; VAS: vía aérea superior; TP: Terapia posicional; DAM: Dispositivo avance mandibular; HTA; hipertensión arterial; REM: rapid eyes movements; MPP: movimientos periódicos de piernas.

| Fenotipos fisiopatológicos |                                                                                                                                                                                                                                              |                                                                                                                                                                                                                                                                                                                                                                                                                                                                                                  |
|----------------------------|----------------------------------------------------------------------------------------------------------------------------------------------------------------------------------------------------------------------------------------------|--------------------------------------------------------------------------------------------------------------------------------------------------------------------------------------------------------------------------------------------------------------------------------------------------------------------------------------------------------------------------------------------------------------------------------------------------------------------------------------------------|
| Clasificación              | Rasgo fundamental                                                                                                                                                                                                                            | Implicaciones                                                                                                                                                                                                                                                                                                                                                                                                                                                                                    |
| PALM 1                     | Alteración anatómica grave                                                                                                                                                                                                                   | Necesidad de intervención anatómica mayor (CPAP)                                                                                                                                                                                                                                                                                                                                                                                                                                                 |
| PALM 2 a                   | Alteración anatómica moderada sin alteración no anatómica                                                                                                                                                                                    | <p>Necesidad de intervención anatómica:</p> <p>Presión positiva continua en las vías respiratorias (CPAP)</p> <p>Cirugía de vía aérea superior (VAS)</p> <p>Terapia posicional (TP)</p> <p>Dispositivo avance mandibular (DAM)</p> <p>Pérdida de peso</p>                                                                                                                                                                                                                                        |
| PALM 2 b                   | <p>Alteración anatómica moderada con como mínimo una alteración no anatómica:</p> <ul style="list-style-type: none"> <li>Disminución de la respuesta muscular</li> <li>Elevado <i>loop gain</i></li> <li>Bajo umbral de despertar</li> </ul> | <ul style="list-style-type: none"> <li>Necesidad de intervención anatómica (CPAP, cirugía VAS, TP, DAM, pérdida de peso)</li> <li>Terapia combinada de más de un rasgo anatómico y no anatómico (DAM+ O<sub>2</sub>, TP + hipnóticos).</li> <li>Necesidad de terapia combinada de más de un rasgo no anatómico (O<sub>2</sub>, hipnóticos, entrenamiento muscular, estimulación nervio hipogloso, fármacos que aumenten el tono muscular de VAS o que aumenten el umbral de despertar</li> </ul> |
| PALM 3                     | No alteración anatómica                                                                                                                                                                                                                      | Buena respuesta a terapia combinada de más de un rasgo no anatómico (O <sub>2</sub> , hipnóticos, entrenamiento muscular, estimulación nervio hipogloso, fármacos que aumenten el tono muscular de VAS o que aumenten el umbral de despertar                                                                                                                                                                                                                                                     |
| Fenotipos clínicos         |                                                                                                                                                                                                                                              |                                                                                                                                                                                                                                                                                                                                                                                                                                                                                                  |
| EDS                        | Pacientes con excesiva somnolencia diurna                                                                                                                                                                                                    | <p>↑ del riesgo de hipertensión (HTA)</p> <p>↑ alteraciones del metabolismo glucídico</p> <p>↑ de la mortalidad</p>                                                                                                                                                                                                                                                                                                                                                                              |

|                                                                                 |                                                                                                                                                                                                                                                                                                   |                                                                                                                                                                                                                                                                                                                                                                                                                                                                                                                                              |
|---------------------------------------------------------------------------------|---------------------------------------------------------------------------------------------------------------------------------------------------------------------------------------------------------------------------------------------------------------------------------------------------|----------------------------------------------------------------------------------------------------------------------------------------------------------------------------------------------------------------------------------------------------------------------------------------------------------------------------------------------------------------------------------------------------------------------------------------------------------------------------------------------------------------------------------------------|
|                                                                                 |                                                                                                                                                                                                                                                                                                   | Mejor respuesta al tratamiento con CPAP (HTA, calidad de vida, riesgo cardiovascular, cumplimiento)                                                                                                                                                                                                                                                                                                                                                                                                                                          |
| <b>Fenotipos Polisomnográficos</b>                                              |                                                                                                                                                                                                                                                                                                   |                                                                                                                                                                                                                                                                                                                                                                                                                                                                                                                                              |
| AOS posicional                                                                  | Pcrit mejora en posición lateral                                                                                                                                                                                                                                                                  | <p>Características clínicas:</p> <ul style="list-style-type: none"> <li>• Pacientes varones más jóvenes</li> <li>• ↓ IMC</li> </ul> <p>Características polisomnográficas:</p> <ul style="list-style-type: none"> <li>• Más AOS de REM</li> <li>• ↓ IAH</li> </ul> <p>Posible mejor respuesta al tratamiento con DAM o auto-CPAP</p>                                                                                                                                                                                                          |
| AOS predominante en REM                                                         | Definición más utilizada: IAH global $\geq 5$ , IAH <sub>REM</sub> /IAH <sub>no-REM</sub> $\geq 2$ y IAH <sub>no-REM</sub> $< 15$                                                                                                                                                                 | <p>Características clínicas:</p> <ul style="list-style-type: none"> <li>• ↑ mujeres jóvenes</li> </ul> <p>Características polisomnográficas:</p> <ul style="list-style-type: none"> <li>• ↓ tiempo sueño</li> <li>• ↓ eficiencia y %REM</li> <li>• Episodios más largos y con más hipoxia</li> </ul> <p>Características fisiopatológicas:</p> <ul style="list-style-type: none"> <li>• ↓ Actividad del geniogloso en REM</li> <li>• ↑ Actividad simpática en REM</li> </ul> <p>Posible aumento de riesgo de incidencia y prevalencia HTA</p> |
| Fenotipos basados en variables polisomnográficas en base a análisis de clúster. | <ul style="list-style-type: none"> <li>• <b>AOS leve</b></li> <li>• AOS leve con <b>movimientos periódicos de piernas (MPP)</b></li> <li>• <b>AOS moderada no REM con arousals</b></li> <li>• <b>AOS moderada de REM e hipoxia</b></li> <li>• <b>Hipopnea e hipoxia: AOS grave con</b></li> </ul> | <p>Los grupos con MPP, hipopnea e hipoxia, y el combinado severo tenían un mayor riesgo combinado de episodio cardiovascular o muerte respecto al resto</p> <p>Al comparar con la clasificación basada en IAH (&lt; 15, 15-30, &gt; 30), esta no se asociaba a un aumento del riesgo</p>                                                                                                                                                                                                                                                     |

|                                                                                                                                     |                                                                                                                                                                                                                                                                    |  |
|-------------------------------------------------------------------------------------------------------------------------------------|--------------------------------------------------------------------------------------------------------------------------------------------------------------------------------------------------------------------------------------------------------------------|--|
|                                                                                                                                     | <p>predominio hipopneas e hipoxia</p> <ul style="list-style-type: none"> <li>• <b>Arousal y sueño alterado:</b> AOS grave con apneas con poca desaturación y sueño alterado</li> <li>• <b>Combinado severo:</b> AOS grave con apneas y con desaturación</li> </ul> |  |
| <b>Fenotipos con rasgos combinados procedentes de análisis de grandes bases de datos</b>                                            |                                                                                                                                                                                                                                                                    |  |
| Pacientes con síntomas de insomnio o sueño alterado                                                                                 | <p>Más mujeres, gente mayor</p> <p>AOS menos grave</p> <p>Más riesgo cardiovascular (Estudio ESADA)</p> <p>Menor cumplimiento del tratamiento con CPAP</p>                                                                                                         |  |
| Pacientes ESD jóvenes con AOS grave o fenotipo clásico                                                                              | <p>Pacientes con poca comorbilidad, jóvenes, obesos, sintomáticos, somnolencia conduciendo.</p> <p>Aumento de incidencia de enfermedad cardiovascular</p> <p>AOS grave menos hipoxia</p> <p>Buena adherencia a la CPAP</p> <p>Buena respuesta a la CPAP</p>        |  |
| Pacientes jóvenes con AOS poco sintomáticos                                                                                         | <p>Pacientes con sobrepeso, poco sintomáticos, síntomas nocturnos, poca comorbilidad.</p> <p>AOS menos grave sin hipoxia</p> <p>Posible respuesta a DAM y TP</p> <p>Bajo cumplimiento CPAP</p>                                                                     |  |
| <p>Pacientes AOS con comorbilidad mínimamente sintomáticos</p> <p>(En algún estudio este grupo incluye subgrupo de gente mayor)</p> | <p>Comorbilidad psiquiátrica y cardiovascular prevalente</p> <p>AOS grave con más hipoxemia</p> <p>menor cumplimiento del tratamiento con CPAP</p> <p>Menos beneficio CPAP</p>                                                                                     |  |

#### 4. Apnea obstructiva del sueño y género

La AOS se había considerado una patología clásicamente de varones. En los últimos años se ha demostrado que no solo no es tan infrecuente en las mujeres, sino que además presenta unas características diferenciadas que deben conocerse para abordar correctamente esta patología, que de otra manera puede quedar infradiagnosticada y no tratada. Por otro lado, durante la gestación, los cambios fisiológicos que se producen pueden conducir a una aparición de AOS o a un aumento de la severidad de una AOS preexistente, pudiendo tener consecuencias nocivas para la madre y el feto.

Prevalencia. A pesar de que la AOS es más frecuente en hombres, en mujeres la prevalencia también es elevada. De las cifras de prevalencia clásicas del estudio de Wisconsin (2% en mujeres y 4% en hombres de la población general con IAH  $\geq 5$  y somnolencia) hemos pasado a cifras mucho más elevadas en los estudios poblacionales más recientes: 6% en hombres (rango 3-18%) y 4% (rango 1-17%) en mujeres. Las cifras se disparan si se considera únicamente un IAH  $\geq 5$ : prevalencia media en hombres 27% (9-86%) y en mujeres 22% (3,7-63,7%)<sup>26</sup>. La relación hombre:mujer se sitúa alrededor de 1,5:1 en los estudios poblacionales. Las apneas obstructivas aumentan con la edad en los dos sexos, mientras que la AOS disminuye en la tercera edad también en ambos sexos. En cambio, en las poblaciones clínicas, la diferencia entre hombre:mujer es aún mucho mayor, llegando hasta 10:1. Una de las explicaciones para esta diferencia es que la clínica puede ser diferente en las mujeres<sup>26,27</sup>.

Clínica. Diversos estudios concuerdan en que la presentación clínica de la AOS en mujeres es bastante diferente a la de los hombres, por lo que, si el médico no está lo suficientemente sensibilizado y el grado de sospecha no es el adecuado, no se suelen asociar estas quejas a la sospecha clínica de AOS en esta población, lo que conlleva a un infradiagnóstico. Así, frente a la presentación típica del AOS en el hombre consistente en la tríada de ronquidos, pausas observadas por la pareja y excesiva somnolencia diurna, en mujeres predominan como motivo de consulta síntomas menos típicos como ansiedad, depresión, cefalea, cansancio, fatigabilidad, insomnio, etc. Esta diferente presentación clínica no significa que las mujeres con AOS no ronquen o no tengan pausas, pero no suele ser el motivo de consulta y pueden pasar desapercibidos. También sabemos que las mujeres suelen acudir a la consulta sin su pareja en mucha mayor proporción que los hombres, lo que dificulta el interrogatorio específico sobre ronquidos y pausas observadas, y en otras ocasiones simplemente las parejas masculinas no están pendientes de lo que le ocurre a su pareja durante la noche. La mayor disparidad en las tasas de diagnóstico de AOS entre hombres y mujeres ocurre para IAH entre 5 y 20 episodios/h, y no tanto en índices más elevados<sup>27</sup>. Además, en cuanto a la somnolencia, que es uno de los puntos cardinales de la clínica, las mujeres parecen tener puntuaciones en la escala de somnolencia de Epworth más bajas para el mismo grado de somnolencia. En realidad, la EE no está validada específicamente en mujeres.

Fisiopatología. Existen diferencias de género en la anatomía y función de la VAS: las mujeres tienen una vía aérea superior más estable, por lo que serían menos susceptibles de sufrir apneas obstructivas. Además, los hombres y las mujeres difieren en la respuesta ventilatoria a estímulos químicos, siendo los hombres más susceptibles a la influencia de los mismos que las mujeres. Por otro lado, el aumento de grasa abdominal y cervical asociado con la AOS es más común en los

hombres, por la distribución androide de la grasa. Estos factores podrán influir en las diferencias de prevalencia entre mujeres y hombres. También las hormonas sexuales parecen tener un importante papel, ya que la prevalencia es mayor en mujeres posmenopáusicas respecto a las premenopáusicas. Aunque el mecanismo fisiopatológico por el que actúan las hormonas sexuales no está bien establecido, parece que algunos de sus efectos podrían proteger a la mujer de la AOS. Por ejemplo, la progesterona puede aumentar el tono de la musculatura dilatadora faríngea y aumentar la estabilidad del centro respiratorio, dificultando el colapso de la VAS. Las hormonas sexuales también influyen en la distribución de la grasa corporal y, de hecho, tras la menopausia en las mujeres se produce un cambio en la distribución de la grasa corporal hacia un tipo “androide”, con depósito central de la grasa, más parecida al que presentan los hombres. En definitiva, parece que los niveles elevados de progesterona y estrógeno, junto a niveles bajos de testosterona, protegerían a las mujeres de la AOS antes de la menopausia.

Características polisomnográficas. Diferentes estudios han demostrado que las mujeres suelen presentar IAH más bajos en comparación con los hombres. Así, O'Connor y cols.<sup>28</sup>, en una de las series más amplias, encontraron que el IAH de los hombres fue significativamente superior al de las mujeres y observaron que los episodios respiratorios eran de menor duración y conllevaban menos desaturación, independientemente de la fase del sueño, en mujeres que en hombres. Además, tienden a agrupar los episodios respiratorios durante el sueño REM con más frecuencia. Por el contrario, parece que la AOS posicional es mucho menos frecuente en mujeres que en hombres. Aunque las mujeres tienen apneas e hipopneas semejantes a las de los hombres, presentan con mucha mayor frecuencia episodios de obstrucción parcial de la vía aérea, que se traducen en una limitación al flujo aéreo o resistencia aumentada en la VAS. Esto ocurre sobre todo en mujeres jóvenes. Estos episodios de obstrucción parcial de la vía aérea, si bien provocan consecuencias similares a las apneas o hipopneas, pueden ser más difíciles de identificar, especialmente en los estudios simplificados, y suelen requerir una PSG completa. Diversos estudios han demostrado que las mujeres con predominio de episodios de obstrucción parcial de la vía aérea tenían una sintomatología similar, incluyendo el grado de ESD, que las mujeres con AOS franco consistente en apneas e hipopneas típicas. Todas estas particularidades polisomnográficas pueden favorecer un infradiagnóstico de la AOS o una infravaloración de la gravedad de la enfermedad en mujeres, ya que los episodios son más difíciles de identificar y al concentrarse en REM, el IAH global suele ser más bajo. En la **tabla 8** se resumen las principales diferencias de la AOS según el género.

**Tabla 8.** Diferencias en las características de la AOS según el género. IAH: índice de apnea-hipopnea; IMC: índice de masa corporal. EE: escala Epworth. REM: rapid eyes movements. Modificado de Campos y cols.<sup>27</sup>

|                              | Mujeres    | Hombres    |
|------------------------------|------------|------------|
| Prevalencia IAH $\geq 5$     | 3,7-63%    | 9-86%      |
| IAH $\geq 5$ + EE > 10       | 4% (1-17%) | 6% (3-18%) |
| Edad habitual de diagnóstico | 50-60      | 40-60      |



|                                         |                                                                                                                              |                                                                                     |
|-----------------------------------------|------------------------------------------------------------------------------------------------------------------------------|-------------------------------------------------------------------------------------|
| <b>Síntomas</b>                         | Atípico: cansancio, fatigabilidad, cefalea, ansiedad, depresión, insomnio                                                    | Tríada típica: ronquido, apneas, somnolencia excesiva                               |
| <b>Somnolencia excesiva</b>             | Asociación pobre con AOS<br><br>(EE no validada en mujeres)                                                                  | Asociación fuerte con AOS                                                           |
| <b>Prevalencia de depresión</b>         | 35-40%                                                                                                                       | 12-25%                                                                              |
| <b>Presencia de pareja en la visita</b> | Rara                                                                                                                         | Frecuente                                                                           |
| <b>Sospecha clínica</b>                 | Baja                                                                                                                         | Alta                                                                                |
| <b>Obesidad</b>                         | Frecuente. Mayor IMC, distribución periférica de la grasa                                                                    | Frecuente. Menor IMC, distribución central de la grasa                              |
| <b>Vía aérea superior</b>               | Menos colapsable                                                                                                             | Más colapsable                                                                      |
| <b>Hormonas sexuales</b>                | Gran influencia<br><br>Progesterona y estrógenos protegen de la AOS Menopausia favorece AOS                                  | Escasa influencia                                                                   |
| <b>Perfil polisomnográfico</b>          | Menor IAH. Predominio de episodios en REM. Menor desaturación. Predominio de obstrucción parcial y limitación al flujo aéreo | Predominio de AOS posicional. Mayor IAH. AOS menos dependiente de la fase del sueño |

AOS y embarazo. Diversos cambios fisiológicos que se producen durante el embarazo pueden predisponer a padecer una AOS, aunque otros también protegen (**Tabla 9**), y los mecanismos concretos no están bien aclarados. En los últimos años numerosos estudios han demostrado que la prevalencia de la AOS en el embarazo está aumentada, tanto cuando se ha analizado mediante cuestionarios clínicos, como más recientemente mediante estudios polisomnográficos. Los estudios que han utilizado equipos nivel 1 o 2 han encontrado prevalencias de entre el 17% al 45%, mientras que los que han empleado nivel 3 en general han sido más bajas (3-20%)<sup>29</sup>. Estas discrepancias según los estudios pueden deberse a diferentes factores como la edad gestacional, diferentes IMC, factores de riesgo, tipo de equipos y criterios diagnósticos. Los pocos estudios que analizan la evolución de la AOS a lo largo del embarazo encuentran un aumento del primer al tercer trimestre. Qué ocurre con la AOS una vez ha finalizado el embarazo es totalmente desconocido.

**Tabla 9.** Factores que pueden favorecer o proteger de la AOS a la mujer embarazada. Modificado de Campos y cols.<sup>27</sup>. VAS: vía aérea superior; REM: rapid eyes movements

| FACTORES PREDISPONENTES                                                                        | FACTORES PROTECTORES                                                                                                  |
|------------------------------------------------------------------------------------------------|-----------------------------------------------------------------------------------------------------------------------|
| Aumento de peso                                                                                | Aumento de ventilación/minuto                                                                                         |
| Efecto vacío por aumento del estímulo ventilatorio (progesterona)                              | Preferencia por decúbito lateral                                                                                      |
| Disminución de la capacidad residual funcional (por elevación del diafragma del útero grávido) | Disminución del sueño REM                                                                                             |
| Disminución del calibre de la vía aérea superior (VAS)<br>(mayor en preeclampsia)              | Aumento de estímulo ventilatorio y aumento de actividad de la musculatura de los dilatadores faríngeos (progesterona) |
| Edema VAS (aumento de volumen plasmático y estrógenos)                                         |                                                                                                                       |

En cuanto a las consecuencias adversas de la AOS sobre la embarazada, se ha encontrado una asociación con hipertensión preexistente o crónica, hipertensión gestacional y preeclampsia<sup>29</sup>. Los mecanismos patogénicos de la preeclampsia son similares a los que producen las consecuencias cardiovasculares de la AOS, incluyendo lesiones de isquemia-reperusión, estrés oxidativo u disfunción endotelial. Por otro lado, la preeclampsia podría ser un factor de riesgo para desarrollar AOS durante el embarazo, debido al acúmulo de líquidos que, al desplazarse cranealmente durante el decúbito, pueden provocar edema en la VAS y favorecer el colapso de la misma. También se ha encontrado en diferentes estudios y metaanálisis una asociación con diabetes gestacional, aunque no queda claro completamente si la asociación es totalmente independiente de la obesidad.

Los estudios que evalúan el impacto de la AOS materna en el feto mediante registros objetivos de sueño son más limitados todavía que los que evalúan el impacto sobre la madre. Es plausible, sin embargo, que la AOS materna pueda contribuir a alterar la hemodinámica y disminuir la perfusión del tejido placentario y disminuir el potencial de crecimiento fetal. Dos estudios prospectivos recientes han demostrado retraso en el crecimiento fetal y bajo peso al nacer en los fetos de madres con AOS. Además, un metaanálisis muy reciente<sup>30</sup>, que incluía estudios por cuestionarios y por PSG, ha encontrado una asociación entre la AOS materna con parto prematuro (< 37 semanas de gestación; *odds ratio* [OR]: 1,86; intervalo de confianza [IC] del 95%: 1,50-2,31), bajo peso al nacer (< 2.500 g;

OR: 1,67; IC del 95%: 1,00-2,78) y un mayor riesgo de tener un parto vaginal asistido (OR: 1,88; IC del 95%: 1,10-3,21) o un parto por cesárea (OR: 1,81; IC del 95%: 1,55-2,11).

Una posible explicación para la variabilidad en los resultados estaría en el diferente riesgo que puede conferir el padecer una AOS previa al embarazo frente al inducido por el embarazo. Mientras la AOS preexistente podría suponer un riesgo potencial para la madre y el feto debido a las desaturaciones intermitentes que han ocurrido durante años, la AOS incidente, es decir, la que se desarrolla por los cambios propios del embarazo, podría suponer un proceso “fisiológico” o bien tener una duración insuficiente para provocar efectos secundarios importantes. En cualquier caso, es evidente que la investigación en esta área es escasa y se precisan estudios de cohortes amplias que aclaren el efecto de la AOS, y si este efecto difiere en el caso de AOS prevalente.

Por último, en cuanto a los efectos de la CPAP para la prevención de estas posibles consecuencias, aunque hay datos que apuntan a efectos beneficiosos del tratamiento con CPAP sobre la presión arterial y los movimientos fetales en mujeres embarazadas con hipertensión gestacional, los hallazgos están marcadamente limitados debido al pequeño tamaño de las muestras y los cortos períodos de intervención.

Quedarían por abordar muchas cuestiones sobre el diseño óptimo de los ensayos a realizar, incluido el momento óptimo durante el embarazo para la identificación de la AOS y el inicio de la terapia (p. ej., primero frente a tercer trimestre), la duración del tratamiento requerido, la modalidad de tratamiento óptima y el umbral de severidad de AOS que plantea un mayor riesgo de efectos adversos y demuestra una reducción del riesgo con el tratamiento.

## BIBLIOGRAFÍA:

1. Guilleminault C, Tilkian A, Dement WC. The sleep apnea syndromes. *Annu Rev Med* 1976;27:465-85.
2. Durán-Cantolla J, Puertas-Cuesta TL, Pin-Arboledas G y el Grupo Español de Sueño (GES). Consenso Nacional sobre el síndrome de las apneas-hipopneas del sueño. *Arch Bronconeumol* 2005;41(Supl. 4):1-110.
3. American Academy of Sleep Medicine. The international classification of Sleep Disorders. 3rd edition. Ed. Westcherter, American Academy of Sleep Medicine, 2014.
4. Block AJ, Boysen PG, Wyne JW, Hunt LA. Sleep apnea, hypopnea and oxygen desaturation in normal subjects. *N Engl J Med* 1979;300:513-7. doi: [10.1056/NEJM197903083001001](https://doi.org/10.1056/NEJM197903083001001).
5. Gould GA, Whyte KF, Rhind GB, Airlie MA, Catterall JR, Shapiro CM, et al. The sleep hypopnea syndrome. *Am Rev Respir Dis* 1988;137:895-8.
6. The American Academy of Sleep Medicine. Manual for the scoring of Sleep and Associated Events. Rules, Terminology and Technical Specifications, 2012.
7. Mansukhani MP, Kolla BP, Wang Z, Morgenthaler TI. Effect of varying definitions of hypopnea and de diagnosis and clinical outcomes of sleep disordered breathing. A systematic review and meta-analysis. *J Clin Sleep Med* 2019;15(5):687-96.
8. Young T, Palta M, Dempsey J, Skatrud J, Weber S, Badr S. The occurrence of Sleep disorders breathing among middle aged adults. *N Eng J Med* 1993;328:1230-610.
9. Martínez-García MA, Campos-Rodríguez F, Barbé F, Gozal D, Agustí A. Precision medicine in obstructive sleep apnoea. *Lancet Respir Med* 2019;7(5):456-64. doi: 10.1016/S2213-2600(19)30044-X.
10. Randerath WJ, Herkenrath S, Treml M, Grote L, Hedner J, Bonsignore MR et al. Evaluation of a multicomponent grading system (Baveno classification) for obstructive sleep apnoea. *ERJ Open Research* Jan 2021, 00928-2020; DOI: 10.1183/23120541.00928-2020
11. Eckert DJ. Pnenotypic approaches to obstructive sleep apnea- New pathways for targeted therapy. *Sleep Med Rev* 2018;37:45-59. doi: 10.1016/j.smrv.2016.12.003.
12. Esteller E, Carrasco M, Díaz-Herrera MÁ, Vila J, Sampol G, Juvanteny J et al. Clinical Practice Guideline recommendations on examination of the upper airway for adults with suspected obstructive sleep apnoea-hypopnoea syndrome. *Acta Otorrinolaringol Esp*. 2019;70(6):364-372. doi: 10.1016/j.otorri.2018.06.008.
13. Clinical Practice Guideline recommendations on examination of the upper airway for adults with suspected obstructive sleep apnoea-hypopnoea syndrome. *Acta Otorrinolaringol Esp*. 2019;70(6):364-372. doi: 10.1016/j.otorri.2018.06.008. Larrosa F, Roura J, Dura MJ, Guirao M, Alberti A, Alobid I. Adaptation and validation of the Spanish version of the Nasal Obstruction Symptom Evaluation (NOSE) Scale. *Rhinology* 2015;53:176-80. doi: 10.4193/Rhino14.137.
14. Carrasco M, Martínez, Baptista P, O'Connor C, Plaza G, Méndez-Benegassi I, et al. La endoscopia del sueño inducido. *Acta Otorrinolaringol Esp* 2019.doi.org/10.1016/j.otorri.2019.02.007.
15. Peres BU, Hirsch Allen AJ, Fox N, Laher I, Hanly P, Skomro R et al; Canadian Sleep and Circadian Network. Circulating biomarkers to identify cardiometabolic complications in

- patients with Obstructive Sleep Apnea: A systematic review. *Sleep Med Rev* 2019;44:48-57. doi: 10.1016/j.smr.2018.12.004.
16. Van der Touw T, Andronikos NM, Smart N. Is C-reactive protein elevated in obstructive sleep apnea? a systematic review and meta-analysis. *Biomarkers* 2019;24(5):429-35. [doi.org/10.1080/1354750X.2019.1600025](https://doi.org/10.1080/1354750X.2019.1600025).
17. Petrone A, Mormile F, Bruni G, Quartieri M, Bonsignore M, Marrone O. Abnormal thyroid hormones and non-thyroidal illness syndrome in obstructive sleep apnea, and effects of CPAP treatment. *Sleep Med* 2016;23:21-5. doi:10.1016/j.sleep.2016.07.002 1389-9457.
18. Mokhlesi B, Masa JF, Brozek J, Gurubhagavatula I, Murphy P, Piper A, et al. Evaluation and Management of Obesity Hypoventilation Syndrome An Official American Thoracic Society Clinical Practice Guideline. *Am J Respir Crit Care Med* Vol 2019;200(3):e6-e24. doi: 10.1164/rccm.201905-1071ST.
19. Kwon Y, Misialek JR, Duprez D, Alonso A, Jacobs DR Jr, Heckbert SR, et al. Association between sleep disordered breathing and electrocardiographic markers of atrial abnormalities: the MESA study. *Europace* 2017;19:1759-66. doi: 10.1093/europace/euw328.
20. Mediano O, Cano-Pumarega I, Sánchez-de-la-Torre M, Alonso-Álvarez ML, Troncoso MF, García-Río F, et al; Spanish Sleep Network. Upcoming Scenarios for the Comprehensive Management of Obstructive Sleep Apnea: An Overview of the Spanish Sleep Network. *Arch Bronconeumol* 2019. doi: 10.1016/j.arbres.2019.05.017.
21. Zynchuk AV, Genctry MJ, Contacto J, Yaggi HK. Phenotypes in obstructive sleep apnea: A definition, examples and evolution and approaches. *Sleep Med Rev* 2017;35:113-23. doi: 10.1016/j.smr.2016.10.002.
22. Bonsignore MR, Suárez Giron MC, Marrone O, Castrogiovanni A, Montserrat JM. Personalised medicine in sleep respiratory disorders: focus on obstructive sleep apnoea diagnosis and treatment. *Eur Respir Rev* 2017;26(146):170069. doi: 10.1183/16000617.0069-2017.
23. Zinchuk A, Yaggi HK. Phenotypic Subtypes of OSA: A Challenge and Opportunity for Precision Medicine. *Chest*. 2020;157(2):403-420. doi: 10.1016/j.chest.2019.09.002.
24. Quan W, Zheng D, McEvoy D, Barbe F, Chen R, Liu Z, et al. High Risk Characteristics for Recurrent Cardiovascular Events among Patients with Obstructive Sleep Apnoea in the SAVE Study. *EClinicalMedicine* 2018;2-3:59-65. doi: 10.1016/j.eclinm.2018.09.002. eCollection 2018 Aug-Sep.
25. Zinchuk AV, Jeon S, Koo BB, Yan X, Bravata DM, Qin L, et al. Polysomnographic phenotypes and their cardiovascular implications in obstructive sleep apnoea. *Thorax* 2018;73(5):472-80. doi: 10.1136/thoraxjnl-2017-210431.
26. Theorell-Haglow J, Miller CB, Bartlett DJ, Yee BJ, Openshaw HD, Grunstein RR. Gender differences in obstructive sleep apnoea, insomnia and restless legs syndrome in adults e What do we know? A clinical update. *Sleep Medicine Reviews* 2018;38:28e38. doi: 10.1016/j.smr.2017.03.003.

27. Campos-Rodríguez F, Masdeu-Margalef MJ, Martínez-García MA. OSA in Women and pregnancy. En: Bar F, Pépiné J-L (eds.). *Obstructive Sleep Apnoea*. ERS Monogr 2015;67:66-89. doi: 10.1183/2312508X.10004514.
28. O'Connor C, Thornley KS, Hanly PJ. Gender differences in the polysomnographic features of obstructive sleep apnea. *Am J Respir Crit Care Med* 2000;161(5):1465e72. doi: 10.1164/ajrccm.161.5.9904121.
29. Pamidi P, Kimoff RJ. Maternal Sleep-Disordered Breathing. *Chest* 2018;153(4):1052-66. doi: 10.1016/j.chest.2017.10.011.
30. Brown NT, Turner JM, Kumar S. The intrapartum and perinatal risks of sleep-disordered breathing in pregnancy: a systematic review and metaanálisis. *American Journal of Obstetrics & Gynecology* 2018;147-61. doi: 10.1016/j.ajog.2018.02.004.
