# Supplementary material
Source: Elsevier journal article supplement (https://www.sciencedirect.com/science/article/pii/S0300289621004099)
Supplement: mmc4 [file S0300289621004099:mmc4.pdf]

## 2.2. MÉTODOS DIAGNÓSTICOS

**Nicolás González Mangado (editor)** Jefe de Servicio de Neumología. Director de la Unidad Multidisciplinar de Sueño (UMS). Fundación Jiménez Díaz. Instituto de Investigación Sanitaria FJD. Madrid. Centro de Investigación Biomédica en Red de Enfermedades Respiratorias (CIBERES), Madrid, Spain.

**Juan Fernando Masa Jiménez.** Hospital San Pedro de Alcántara. Cáceres. CIBER de Enfermedades Respiratorias (CIBERES). ISCIII. Madrid. Instituto Universitario de Investigación Biosanitaria en Extremadura (INUBE). Cáceres.

**María Ángeles Sánchez Quiroga.** Hospital Virgen del Puerto de Plasencia. CIBER de Enfermedades Respiratorias (CIBERES). ISCIII. Madrid. Instituto Universitario de Investigación Biosanitaria en Extremadura (INUBE). Cáceres.

Tras una sospecha clínica inicial basada en la sintomatología durante el sueño, como el ronquido y las pausas respiratorias, y las manifestaciones durante la vigilia, como son la hipersomnolencia o el sueño no reparador, y que son consecuencia de las alteraciones fisiopatológicas descritas en el capítulo anterior, debemos establecer un diagnóstico de confirmación o exclusión de la apnea obstructiva del sueño (AOS) y su gravedad, para lo cual existen diferentes herramientas clínicas y pruebas diagnósticas que describiremos a continuación.

### 1. Cuestionarios

En la práctica clínica disponemos de diferentes herramientas clínicas y cuestionarios que nos ayudan a establecer la sospecha clínica o valorar aspectos concretos de la esfera de la AOS como la somnolencia.

#### Evaluación subjetiva de la somnolencia

Son muchas las causas de somnolencia diurna excesiva, y entre ellas está la AOS.

Existen diferentes cuestionarios que valoran su presencia y magnitud, como el cuestionario Stanford, Karolinska o escalas visuales. Sin embargo, dentro del ámbito de los trastornos respiratorios del sueño, el cuestionario más extendido es la *escala de somnolencia Epworth*. Se trata de un cuestionario simple y autoadministrado que proporciona una medida del nivel general de somnolencia diurna del sujeto<sup>1</sup>. Está formado por ocho preguntas que exploran la posibilidad de sentir somnolencia en diferentes circunstancias de la vida cotidiana. La puntuación total es de 0 a 24 y se considera anormal una puntuación por encima de 10. Algunas preguntas pueden presentar variaciones socioculturales, pero existe una versión traducida y validada para la población española<sup>2</sup>. Aunque su reproducibilidad es variable, se trata de una herramienta sencilla y rápida, puesto que el paciente puede rellenarla en escasos minutos, por lo que puede ser utilizada tanto en la valoración inicial ante la sospecha de un trastorno respiratorio del sueño como en el seguimiento para ver la evolución y respuesta al tratamiento prescrito.

#### Cribado y herramientas predictivas

El *cuestionario Berlin* consta de 11 preguntas divididas en 3 categorías: ronquidos y apneas (5 preguntas), presencia de somnolencia (4 preguntas) y consecuencias metabólicas (2 preguntas). Cada categoría se considera positiva si se obtiene una puntuación de 2 o más. Si existen al menos dos categorías consideradas positivas, se cataloga al paciente como de alta probabilidad de AOS.

Si solo existe una categoría positiva, el paciente se cataloga como de baja probabilidad<sup>3</sup>. Es poco útil para el diagnóstico de la AOS, puesto que, comparado con la polisomnografía (PSG) o los estudios domiciliarios, tiene una sensibilidad discreta y sobre todo una baja especificidad<sup>4</sup>.

El *cuestionario OSA-50* ha sido desarrollado dentro de una estrategia en dos pasos para el diagnóstico de pacientes con AOS severa en el ámbito de la atención primaria. Dicha estrategia consiste en realizar un cuestionario sencillo con 4 ítems y posteriormente someter a aquellos pacientes con una alta puntuación a un estudio de sueño simplificado, utilizando concretamente el dispositivo ApneaLink<sup>5</sup>.

El *cuestionario NoSAS* es una herramienta muy sencilla que consta de 6 ítems (circunferencia del cuello, índice de masa corporal de 25-30 o > 30, presencia de ronquidos, edad mayor de 55 años y sexo masculino) con diferente peso en la puntuación total, la cual se mueve entre 0 y 17. Una puntuación de 8 o mayor identifica a pacientes subsidiarios de realizarse un estudio de sueño<sup>6</sup>.

El *cuestionario STOP-BANG* es una herramienta de cribado que consta de 4 preguntas con respuesta sí/no (*STOP: snore, tired, observed, pressure*) y 4 atributos clínicos (*BANG: body mass index, age, neck, gender*)<sup>7</sup>. Su puntuación varía de 0 a 8 y establece el riesgo de presentar AOS. En general, comparado con la PSG o estudios de sueño domiciliarios, tiene una alta sensibilidad, pero una baja especificidad para el diagnóstico, lo cual se acentúa a medida que el índice de apnea-hipopnea (IAH) es más elevado<sup>4</sup>. Sin embargo, puesto que es el cuestionario más ampliamente estudiado en diferentes situaciones clínicas y quirúrgicas, sería el más recomendado tanto a nivel especializado como en atención primaria. Además, en un metaanálisis publicado en 2017, comparado con otros cuestionarios como Berlin y Epworth, se mostró como la herramienta más precisa para detectar pacientes con AOS de cualquier gravedad<sup>8</sup>.

Otras herramientas predictivas: existen diferentes modelos basados en medidas morfométricas o variables clínicas que intentan predecir la presencia de AOS, como el cuestionario de predicción de apnea multivariable, OSAS Score y el índice de Kushida, entre otros.

Como sucede con el resto de cuestionarios y herramientas mencionadas, no sirven por sí solos para el diagnóstico, debido a los falsos positivos y negativos que presentan cuando se comparan con un estudio de sueño domiciliario o en el laboratorio. Su utilidad podría estar en el hecho de establecer prioridades en el momento de realizar un test diagnóstico, aunque la evidencia existente es limitada.

## 2. Polisomnografía

La PSG sigue siendo el patrón de referencia para el diagnóstico de la AOS, por lo que todos los demás tests diagnósticos son comparados con ésta para establecer su capacidad para diagnosticar o excluir la enfermedad. Además, la PSG permite diagnosticar otros trastornos del sueño que pueden ser la causa de los síntomas o coexistir con la AOS.

La PSG convencional abarca el registro de variables cardiorrespiratorias y neurofisiológicas, lo cual permite analizar el tiempo y la estructura del sueño, la presencia de diferentes episodios respiratorios y sus repercusiones. Las señales habitualmente recogidas en el registro son: electroencefalograma (EEG), electrooculograma, electromiograma submentoniano y/o tibial anterior, flujo, movimientos respiratorios torácico y abdominal, saturación de oxígeno, posición y electrocardiograma. Pueden añadirse otras variables adicionales como el registro transcutáneo de CO<sub>2</sub>, presión esofágica, tiempo de tránsito de pulso o imágenes de vídeo.

Todas estas señales ayudan no solo a cuantificar los episodios respiratorios obstructivos o centrales, sino también a diagnosticar y establecer la severidad de otros trastornos respiratorios durante el sueño y a reconocer o sugerir la presencia de otros diagnósticos alternativos, como el síndrome de las piernas inquietas o el movimiento periódico de las piernas, parasomnias, narcolepsia o alteraciones del ritmo circadiano.

Lo más diferenciador de la PSG respecto a estudios de sueño más simplificados es el registro del EEG. Se requiere un mínimo de 3 canales para la estadificación del sueño, en concreto derivaciones frontal (F), central (C) y occipital (O). La American Academy of Sleep Medicine (AASM) recomienda las derivaciones derechas utilizando de referencia el electrodo situado en la derivación mastoidea izquierda (F4-M1, C4-M1 y O2-M1)<sup>9</sup>.

A pesar de los avances tecnológicos y la mejora de las señales obtenidas, la lectura y el análisis del registro de la PSG deben hacerse siempre manualmente. Para la estadificación del sueño se recomienda la lectura por períodos de 30 segundos llamados “épocas”, para cada una de las cuales se asigna un solo estadio de modo que, si en una sola época existen varios estadios de sueño, se asigna el que más tiempo ocupe. Para el análisis de los episodios respiratorios y movimientos de piernas no hay una regla fija, pero se recomienda la lectura en ventanas de 1 a 5 minutos.

La PSG suele realizarse en el laboratorio del sueño y bajo vigilancia de técnicos especializados, pero existe la posibilidad de efectuarla en el domicilio utilizando equipos portátiles y sin vigilancia. Para ello, el paciente puede ser preparado en el laboratorio de sueño, dejándole colocados los sensores para después dormir en el domicilio, o puede ser preparado por un técnico que se desplace al domicilio del paciente para colocar *in situ* los sensores.

Ambos tipos de PSG, en laboratorio o domicilio, son similares en cuanto a diagnóstico, aunque los estudios domiciliarios pueden infraestimar la severidad del IAH en un 10%<sup>10</sup>.

Cuando se realiza una PSG en el laboratorio existe la posibilidad de hacer un estudio a noche completa o a noche partida (*split-night*), donde la primera parte de la noche se destina al diagnóstico y el resto a la titulación de presión positiva continua (CPAP) cuando hay indicación de esta. Según la AASM, en el protocolo para un estudio basado en noche partida sería necesario objetivar una AOS moderada-severa durante un mínimo de 2 horas del tiempo de registro de PSG y disponer de al menos 3 horas para la titulación de CPAP<sup>4</sup>. Ambos protocolos son válidos y aceptados bajo la elección del clínico y siempre que se cumplan los requisitos.

### 3. Poligrafía respiratoria

Aunque la PSG es el método de referencia para el diagnóstico de la AOS, su complejidad de realización e interpretación, junto con la gran demanda en el diagnóstico, ha hecho que se hagan múltiples esfuerzos en desarrollar equipos y estrategias de manejo más simples.

La poligrafía respiratoria (PR), clasificada como un monitor portátil de nivel 3 (**Tabla 1**), incluye el registro de un sensor de flujo, esfuerzo respiratorio, saturación de oxígeno y frecuencia cardíaca<sup>9</sup>. Pueden añadirse otros registros como la posición o el ronquido. La mayor diferencia con la PSG es la ausencia del registro de señales que permiten establecer las fases del sueño, por lo que el IAH puede ser infraestimado al considerar un tiempo de registro mayor al tiempo real de sueño, puesto que no puede saberse exactamente cuándo el paciente está despierto. Esto puede minimizarse parcialmente utilizando la posición, la actigrafía o un diario de sueño para ajustar el tiempo utilizado en el análisis al tiempo de sueño del paciente. Otra causa de infraestimación del IAH es que la PR no es capaz de identificar las hipopneas asociadas a microdespertares.

**Tabla 1.** Estudios de evaluación de la apnea del sueño. ECG: electrocardiograma; EEG: electroencefalograma; EMG: electromiograma; EOG: electrooculograma; PSG: polisomnografía. PSG: polisomnografía. EEG: electroencefalograma. EOG: electrooculograma. EMG: electromiograma.

|                                               | <b>Nivel I<br/>PSG estándar</b>                                                                                                                                                                   | <b>Nivel II<br/>PSG portátil</b>                                                                                                                                                                                        | <b>Nivel III<br/>Poligrafía<br/>respiratoria</b>                                                                                                                                                                      | <b>Nivel IV<br/>Registro de una<br/>o dos señales</b> |
|-----------------------------------------------|---------------------------------------------------------------------------------------------------------------------------------------------------------------------------------------------------|-------------------------------------------------------------------------------------------------------------------------------------------------------------------------------------------------------------------------|-----------------------------------------------------------------------------------------------------------------------------------------------------------------------------------------------------------------------|-------------------------------------------------------|
| <b>Parámetros<br/>mínimos<br/>registrados</b> | <ul style="list-style-type: none"> <li>- EEG</li> <li>- EOG</li> <li>- EMG de mentón</li> <li>- ECG</li> <li>- Flujo</li> <li>- Esfuerzo respiratorio</li> <li>- Saturación de oxígeno</li> </ul> | <ul style="list-style-type: none"> <li>- EEG</li> <li>- EOG</li> <li>- EMG de mentón</li> <li>- ECG o frecuencia cardíaca</li> <li>- Flujo</li> <li>- Esfuerzo respiratorio</li> <li>- Saturación de oxígeno</li> </ul> | <ul style="list-style-type: none"> <li>- Al menos 2 canales de movimientos respiratorios o 1 de movimiento respiratorio y 1 de flujo</li> <li>- Frecuencia cardíaca o ECG</li> <li>- Saturación de oxígeno</li> </ul> | Habitualmente saturación de oxígeno y/o flujo         |
| <b>Lugar de realización</b>                   | Laboratorio de sueño                                                                                                                                                                              | Domicilio                                                                                                                                                                                                               | Habitualmente domicilio                                                                                                                                                                                               | Habitualmente domicilio                               |

Aunque puede realizarse en el laboratorio del sueño, la PR fue ideada para estudios domiciliarios. Habitualmente el paciente es el encargado de recoger y devolver el equipo al centro, siendo instruido en su colocación por personal cualificado, si bien en modelos más recientes el registro puede ser transmitido telemáticamente<sup>11</sup> evitando inconvenientes para el paciente.

Actualmente, la PR es un método aceptado para el manejo de pacientes con probabilidad de AOS de intermedia a alta, es decir, aquellos que presentan excesiva somnolencia diurna y al menos dos de los siguientes tres criterios: ronquido alto habitual; apneas observadas, respiración dificultosa o ahogos; o hipertensión arterial<sup>4,11,12</sup>.

Cuando hablamos de manejo de la AOS nos referimos al proceso del diagnóstico seguido de una decisión terapéutica, ya que una vez que el paciente es diagnosticado de AOS se debe además tomar la decisión de cómo tratar, sobre todo si se prescribe o no tratamiento con CPAP. Diferentes estudios han explorado el acuerdo diagnóstico de la PR frente a la PSG utilizando diferentes puntos de corte del IAH para clasificar a los pacientes. En general, la precisión diagnóstica de la PR mejora con la severidad de la enfermedad, sobre todo la especificidad y la probabilidad post-test diagnóstica<sup>13</sup>. Algo parecido sucede cuando lo que se valora es el acuerdo entre la PR y la PSG en la decisión terapéutica, de modo que dicho acuerdo se alcanza cuando el IAH en la PR es alto ( $\geq 30$ )<sup>14</sup>, pudiendo reducirse las diferencias entre ambos métodos al seleccionar a los pacientes con mayor hipersomnolencia (Epworth  $\geq 12$ ), obesos, mayores de 55 años, hipertensos y con mayor

frecuencia de apneas observadas, es decir, aquellos que con más probabilidad necesiten tratamiento con CPAP<sup>15</sup>.

A pesar de las diferencias que puedan existir entre la PR y la PSG en la precisión diagnóstica o con la toma de decisiones, los ensayos clínicos que han comparado el cambio en diversas variables clínicas en pacientes cuyo manejo se basó en la PR frente a PSG no han encontrado diferencias significativas en la somnolencia reportada por el paciente, calidad de vida o adherencia al tratamiento con CPAP, por lo que independientemente del método utilizado la situación clínica de los pacientes a medio-largo plazo es similar<sup>12,16-21</sup>. Además, el uso de la PR puede suponer un significativo ahorro económico con resultados favorables en el análisis de coste-efectividad, ya que el manejo basado en la PR puede ser hasta un 50% más barato que el manejo basado en la PSG, con una efectividad similar<sup>12</sup>.

Por lo tanto, existe suficiente evidencia para afirmar que la PR es un método adecuado para el manejo de los pacientes con probabilidad de AOS de intermedia a alta, lo cual supone una mejora en la respuesta a la gran demanda de estudios de sueño y un ahorro económico. Ahora bien, debemos tener en cuenta que aquellos pacientes con baja sospecha de AOS, con sospecha de otros trastornos del sueño que puedan justificar la clínica o con enfermedad cardiopulmonar significativa o inestable o desórdenes respiratorios del sueño complejos (hipoventilación, síndrome complejo de apnea del sueño, apneas centrales), deberían ser estudiados por PSG, puesto que estos pacientes fueron excluidos de los ensayos clínicos y no existe actualmente suficiente evidencia para afirmar que la PR es un método válido para su manejo<sup>4,13</sup>.

Otro punto importante es el ámbito del estudio, puesto que en los ensayos clínicos mencionados el manejo de los pacientes con sospecha de AOS fue realizado mayoritariamente en un ámbito especializado, de modo que la selección de los pacientes, interpretación del estudio de sueño con análisis manual y decisión terapéutica fueron realizados por especialistas en sueño.

Los equipos de PR incorporan *softwares* cada vez mejor desarrollados que permiten el análisis automático de los registros, pero la tecnología y algoritmos utilizados varían según el dispositivo, y hasta ahora la AASM sigue recomendando el análisis manual según la evidencia hoy existente. Varios estudios han analizado el acuerdo entre el análisis automático y manual del registro de PR o entre el análisis automático de la PR y la PSG<sup>22-29</sup>. Parece que dicho acuerdo se alcanza sobre todo en los IAH más elevados, por encima de 25-30, lo cual puede limitar su uso en la práctica clínica. Sin embargo, esto podría ser de utilidad en los centros menos especializados, donde podría realizarse un análisis secuencial, es decir, un primer análisis automático para todos los registros seguido de un análisis manual solo para aquellos con un IAH resultante < 25-30. Este análisis manual podría, si es necesario, realizarse en el laboratorio de sueño de referencia tras transmitir telemáticamente el registro<sup>15</sup>.

#### **4. Otros métodos diagnósticos**

##### **Sistemas simplificados de nivel 4**

Existen dispositivos simplificados para el diagnóstico de la AOS que constan de 1 o 2 canales de registro (oximetría y/o presión nasal). La mayor utilidad de estos es acercar el manejo de la patología a niveles de asistencia no especializados para facilitar satisfacer la gran demanda de diagnóstico. Aunque la evidencia en la utilidad de dichos dispositivos es menor que en el caso de la PR, diferentes estudios han comparado el manejo por atención primaria de los pacientes con probabilidad de AOS de intermedia a alta basado en el diagnóstico por un dispositivo simplificado frente al manejo especializado utilizando la PSG en laboratorio. Parece que la mayor complejidad está en la decisión terapéutica, incluso cuando los médicos de atención primaria reciben formación

específica para ello<sup>14,31</sup>, por lo que simplificar este proceso y hacerlo más generalizable puede ser otro paso a dar para que la atención primaria pueda implicarse en el manejo de la AOS.

En el 2018 se publicó un ensayo clínico donde los pacientes con alta sospecha de AOS eran manejados en atención primaria con un sistema de dos canales (oximetría y presión nasal) para el diagnóstico domiciliario y una decisión terapéutica semiautomática basada en el IAH, edad e índice de masa corporal del paciente. Tras 6 meses de seguimiento, el cambio en la somnolencia presentada por el paciente, calidad de vida, presión arterial, cumplimiento y uso de recursos sanitarios fueron similares en este grupo de pacientes comparado con aquellos que fueron manejados por especialistas según el resultado de la PSG, siendo una alternativa coste-efectiva con un ahorro de más del 50%<sup>32</sup>. Más estudios en este sentido serían precisos para saber si estos resultados son reproducibles.

### Otros dispositivos portátiles de nivel 3

A diferencia de lo que conocemos como PR, otros dispositivos de nivel 3<sup>33</sup>, diseñados principalmente para estudios de sueño domiciliarios, basan la detección de los episodios respiratorios en el análisis del registro de la tonometría arterial periférica (PAT, *peripheral arterial tonometry*) como sustituto del flujo o esfuerzo respiratorio. Dichos dispositivos incorporan además un registro de oximetría y de actimetría, de modo que los episodios respiratorios son detectados por un descenso en la señal de la PAT junto con un incremento de la frecuencia cardíaca y cambios en la saturación de oxígeno. La actigrafía ayuda a ajustar el tiempo de sueño frente al tiempo total de registro.

En un ensayo clínico que comparaba un protocolo de manejo usando un dispositivo portátil basado en la PAT y autotitulación de CPAP frente a un protocolo basado en la PSG para diagnóstico y titulación, en pacientes con probabilidad de AOS de intermedia a alta, se encontraron resultados similares en adherencia y objetivos clínicos<sup>33</sup>.

Al igual que la PR, la AASM acepta el uso de estos dispositivos para el manejo de los pacientes con probabilidad de AOS de intermedia a alta<sup>4</sup>, aunque la evidencia es menor.

## **5. Algoritmo diagnóstico**

Siendo una enfermedad de alta prevalencia, la AOS debería ser manejada por diferentes niveles asistenciales dentro de nuestro sistema sanitario para poder satisfacer la demanda.

Presentamos dos algoritmos de diagnóstico. El primero de ellos (**Figura 1**) se desarrollaría a nivel especializado. Los pacientes con patología cardiopulmonar inestable, con sospecha de otros trastornos del sueño que puedan ser la causa de los síntomas o que puedan coexistir con la apnea del sueño, con presencia o sospecha de otros desórdenes respiratorios durante sueño y algunos pacientes con trastorno ansioso-depresivo o insomnio, son candidatos a estudio mediante PSG. Los pacientes con baja probabilidad, según valoración experta, pueden ser subsidiarios de seguimiento y corrección de otros factores influyentes o puede decidirse realizar una PSG o PR. Aquellos con probabilidad de intermedia a alta pueden ser manejados por PR.

Proponemos un segundo algoritmo de manejo a nivel de atención primaria (**Figura 2**) en el que los pacientes con alta probabilidad por hipersomnolencia (Epworth  $\geq 12$ ) podrían ser manejados por estudios simplificados con dispositivos de 1 o 2 canales basados en oximetría y/o presión nasal<sup>32</sup>. Es muy importante recalcar que dicho manejo debe ser realizado siempre en coordinación con el laboratorio del sueño de referencia para recibir el apoyo necesario, establecer protocolos ajustados según las necesidades y que exista el *feedback* suficiente para que los médicos de atención primaria



ganen confianza, experiencia y no se pierda la perspectiva del especialista en sueño. Además, podrían existir otros modelos de colaboración con atención primaria con una formación más intensa para los médicos y que permitan hacer un diagnóstico y la toma de decisión terapéutica. Hay la posibilidad de establecer una decisión terapéutica desde atención primaria de forma coordinada con el nivel especializado, pero estos modelos pueden ser menos generalizables, aunque subsidiarios de aplicarse en áreas concretas con una validación previa<sup>34</sup>.

**Figura 1.** Algoritmo propuesto para el diagnóstico de pacientes con sospecha de apnea obstructiva del sueño (AOS) a nivel especializado. DT: decisión terapéutica; ECP: enfermedad cardiopulmonar; ESD: excesiva somnolencia diurna; IAH: índice de apnea-hipopnea; PR: poligrafía respiratoria; PSG: polisomnografía.

\*Se define intermedia-alta probabilidad por la presencia de ESD (Epworth > 10) y 2 de los siguientes 3 criterios: ronquido intenso habitual, despertares asfícticos o apneas observadas y/o hipertensión arterial.

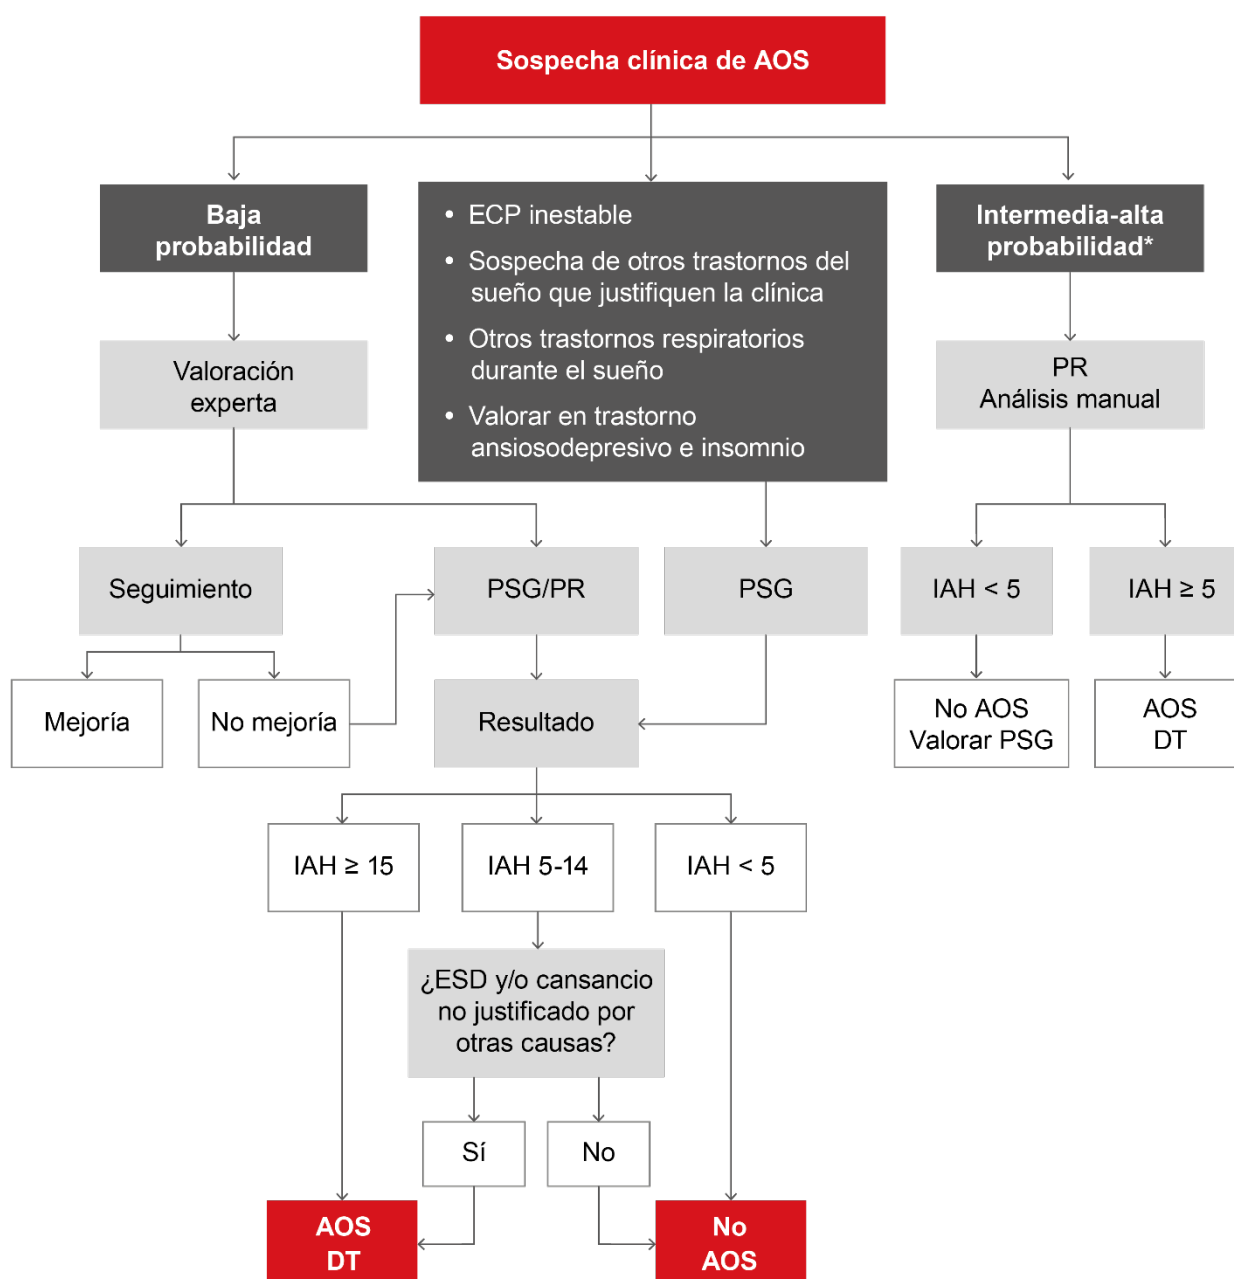

**Figura 2.** Propuesta de algoritmo diagnóstico en pacientes con sospecha de apnea obstructiva del sueño (AOS) en atención primaria en coordinación con el laboratorio de sueño de referencia. DT: decisión terapéutica; ECP: enfermedad cardiopulmonar; ES: estudio simplificado (1 o 2 canales correspondientes a presión nasal y oximetría); ESD: excesiva somnolencia diurna; IAH: índice de apneas-hipopneas; IMC: índice de masa corporal.

\*Se define alta probabilidad de AOS por la presencia de ESD con Epworth  $\geq 12$  y 2 de los siguientes 3 criterios: ronquido alto habitual, despertares asfícticos o apneas observadas y/o hipertensión arterial.

\*\*En estos casos puede ofrecerse la opción de un análisis manual del registro por parte del laboratorio de sueño coordinador para un diagnóstico más preciso.

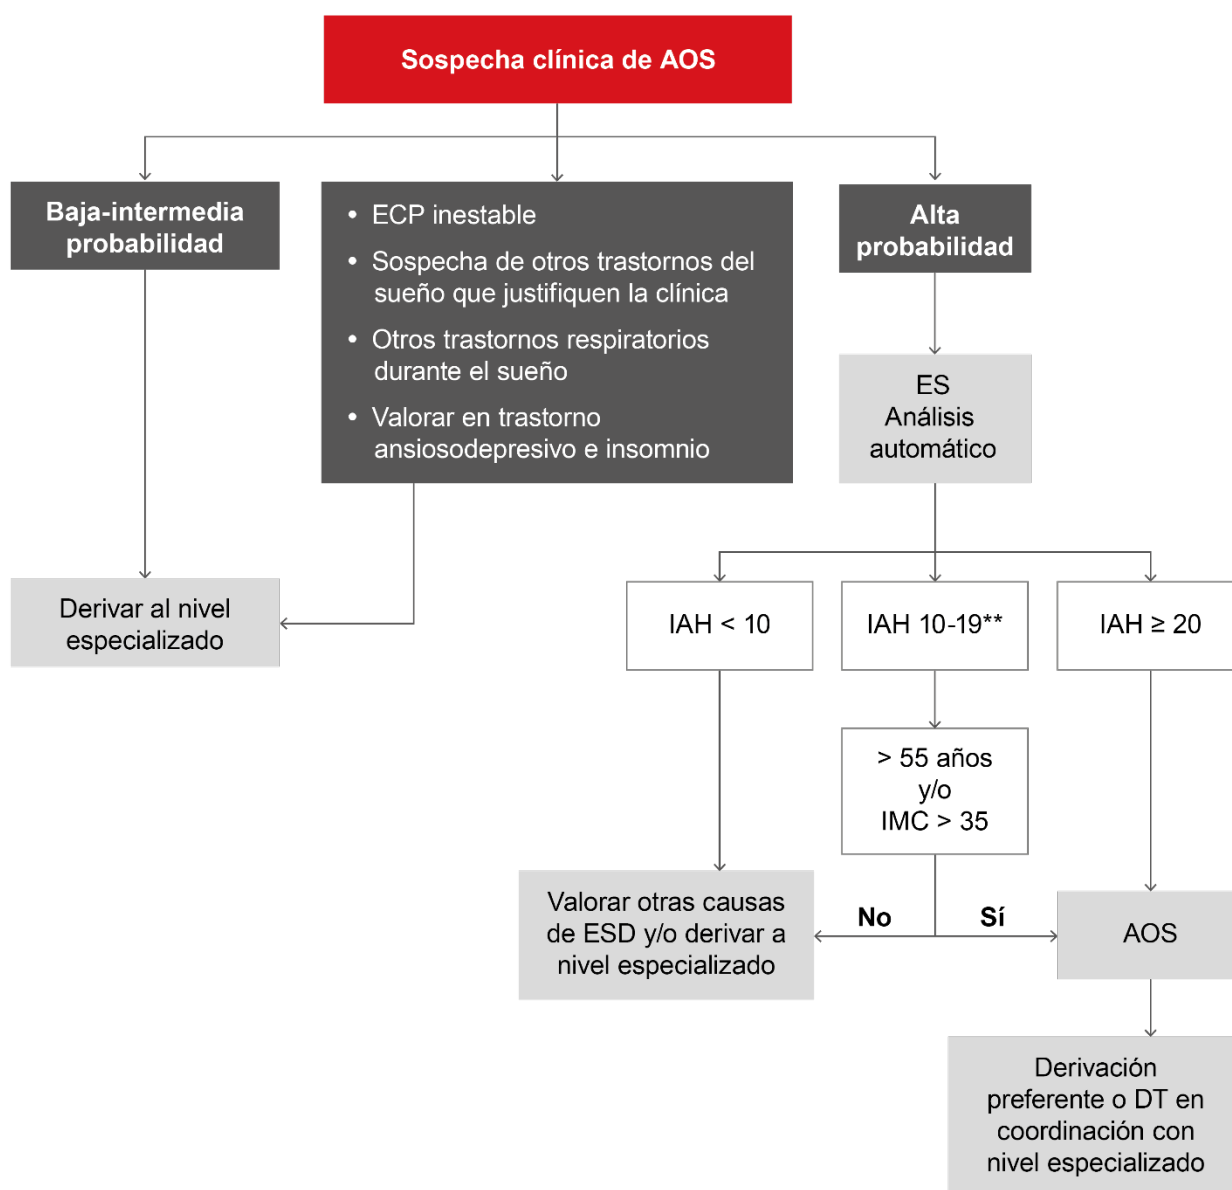



## **6. Perspectivas de futuro en el diagnóstico de la AOS. Normalización de la tecnología. Aplicaciones móviles (App)**

Las nuevas tecnologías ofrecen actualmente una amplia gama de dispositivos inalámbricos y aplicaciones móviles que miden diferentes aspectos de nuestra vida, incluido el sueño. Dichos dispositivos son cada vez más populares entre la población general. Diferentes estudios tratan de establecer la fiabilidad de estos dispositivos para medir ciertos parámetros del sueño como el tiempo total de sueño, cantidad de sueño profundo y superficial, eficiencia de sueño, incluso han sido comparados frente a PSG, sin embargo hasta ahora el rendimiento es limitado.

La mejora de los algoritmos utilizados podría permitir en un futuro el uso de esta tecnología en la práctica clínica diaria como monitores de sueño no solo en la AOS, sino también en otras situaciones como en el insomnio, las alteraciones del ritmo de sueño o el trabajo por turnos.

Profundizando en el diagnóstico de la AOS, la tecnología inalámbrica y las aplicaciones móviles también van tomando forma. Este es el caso del análisis acústico del ronquido grabado en un smartphone a través de un micrófono externo para detectar episodios respiratorios<sup>35</sup>, bandas torácicas que transmiten la actividad respiratoria diferenciando entre la respiración normal y las apneas<sup>36</sup>, o herramientas más complejas como aplicaciones móviles que analizan diferentes señales como sonido, actigrafía, fotopletimografía, posición corporal y algunas variables clínicas para clasificar a un paciente como que tiene AOS o no<sup>37</sup>.

Muchas de estas herramientas están aún por desarrollar y validar, pero son una visión de futuro en el cribado, el diagnóstico y la monitorización de la AOS, no solo desde un punto de vista simplificado con el análisis de una o dos señales, sino que con la tecnología adecuada podemos estar ante el desarrollo de la PSG inalámbrica.

## **7. Conclusiones**

Los recursos materiales y humanos para el abordaje de la AOS en España siguen siendo insuficientes para cubrir la demanda de una enfermedad tan prevalente y cada vez más conocida por la población general y otras especialidades, lo cual ha supuesto un aumento en el número de peticiones de estudios de sueño.

La PSG sigue siendo considerada el estudio de referencia, sin embargo un considerable número de pacientes, bien seleccionados, pueden ser manejados por estudios más simples y menos costosos sin tener que perder efectividad y calidad en la atención de estos.

Por otra parte, la implicación de los médicos de atención primaria es crucial, puesto que son el pilar de nuestro sistema sanitario, los encargados de establecer la sospecha clínica, y elemento fundamental en el control y la educación de sus pacientes. Su formación en el manejo de la AOS es importante para que puedan ser parte del proceso, pero no podemos pedirles que sean especialistas, por lo que el empleo de sistemas simplificados de diagnóstico y pautas claras en la toma de decisiones forman parte del camino a seguir para su participación, y esto debe hacerse siempre en coordinación con las unidades de sueño de referencia.

Recomendaciones:

1. La realización de cuestionarios como el STOP-BANG son herramientas útiles para establecer la sospecha clínica de AOS, pero no pueden utilizarse con finalidad diagnóstica.

2. La PR es un método diagnóstico útil para los pacientes definidos en este consenso como con probabilidad de intermedia a alta, pero siempre en un entorno especializado. Aunque puede realizarse tanto a nivel hospitalario como extrahospitalario, lo habitual es realizarla en el domicilio del paciente donde ha demostrado ser coste-efectiva.
3. Los métodos simplificados de diagnóstico que incluyen registro de flujo con o sin oximetría tienen un papel en atención primaria, siempre dentro de un marco de coordinación con el nivel especializado. El análisis automático de los registros y la decisión terapéutica semiautomática pueden facilitar la labor del médico de atención primaria sin que sea necesaria una formación intensa.
4. La PSG continúa siendo el patrón de referencia para el diagnóstico de la AOS y está indicada en pacientes con sospecha de otros trastornos de sueño, comorbilidad importante y otros problemas respiratorios como la hipoventilación.

## BIBLIOGRAFÍA:

1. Johns MW. A new method for measuring daytime sleepiness: the Epworth sleepiness scale. *Sleep* 1991;14(6):540-5. doi: 10.1093/sleep/14.6.540.
2. Chiner E, Arriero JM, Signes-Costa J, Marco J, Fuentes I. Validation of the Spanish version of the Epworth Sleepiness Scale in patients with a sleep apnea syndrome. *Arch Bronconeumol* 1999;35(9):422-7. doi: 10.1016/S0300-2896(15)30037-5.
3. Netzer NC, Stoohs RA, Netzer CM, Clark K, Strohl KP. Using the Berlin Questionnaire to identify patients at risk for the sleep apnea syndrome. *Ann Intern Med* 1999;131(7):485-91. doi: 10.7326/0003-4819-131-7-199910050-00002.
4. Kapur VK, Auckley DH, Chowdhuri S, Kuhlmann DC, Mehra R, Ramar K, et al. Clinical practice guideline for diagnostic testing for adult obstructive sleep apnea: an American Academy of Sleep Medicine clinical practice guideline. *SJ Clin Sleep Med* 2017;13(3):479-504. doi: 10.5664/jcsm.6506.
5. Chai-Coetzer CL, Antic NA, Rowland LS, Catcheside PG, Esterman A, Reed RL, et al. A simplified model of screening questionnaire and home monitoring for obstructive sleep apnoea in primary care. *Thorax* 2011;66:213-9. doi: 10.1136/thx.2010.152801.
6. Martí-Soler H, Hirotsu C, Marqués-Vidal P, Vollenweider P, Waeber G, Preisig M, et al. The NoSAS score for screening of sleep-disordered breathing: a derivation and validation study. *Lancet Respir Med* 2016;4(9):742-8. doi: 10.1016/S2213-2600(16)30075-3.
7. Chung F, Subramanyam R, Liao P, Sasaki E, Shapiro C, Sun Y. High STOP-Bang score indicates a high probability of obstructive sleep apnoea. *Br J Anaesth* 2012;108(5):768-75. doi: 10.1378/chest.15-0903.
8. Chiu HY, Chen PY, Chuang LP, Chen NH, Tu YK, Hsieh YJ, et al. Diagnostic accuracy of the Berlin questionnaire, STOP-BANG, STOP, and Epworth sleepiness scale in detecting obstructive sleep apnea: A bivariate meta-analysis. *Sleep Med Rev* 2017;36:57-70. doi: 10.1016/j.smrv.2016.10.004.
9. Berry RB, Quan SF, Abreu AR, Bibbs ML, DelRosso L, Harding SM, et al. for the American Academy of Sleep Medicine. The AASM Manual of the Scoring of Sleep and Associated Events: Rules, Terminology and Technical Specifications. Darien, IL: American Academy of Sleep Medicine; 2020. Version 2.6.
10. Ghegan MD, Angelos PC, Stonebraker AC, Gillespie MB. Laboratory versus portable sleep studies: a metaanalysis. *Laryngoscope* 2006;116(6):859-64. doi: 10.1097/01.mlg.0000214866.32050.2e.
11. Masa JF, Corral J, Pereira R, Duran-Cantolla J, Cabello M, Hernández-Blasco L, et al. Effectiveness of home respiratory polygraphy for the diagnosis of sleep apnoea and hypopnoea syndrome. *Thorax* 2011;66(7):567-73. doi: 10.1136/thx.2010.152272.
12. Corral J, Sánchez-Quiroga MA, Carmona-Bernal C, Sánchez-Armengol A, Sánchez de la Torre A, Durán-Cantolla J, et al. Conventional Polysomnography Is Not Necessary for the Management of Most Patients with Suspected Obstructive Sleep Apnea. Noninferiority, Randomized Controlled Trial. *Am J Respir Crit Care Med* 2017;196(9):1181-90. doi: 10.1164/rccm.201612-2497OC.
13. El Shayeb M, Topfer LA, Stafinski T, Pawluk L, Menon D. Diagnostic accuracy of level 3 portable sleep tests versus level 1 polysomnography for sleep-disordered breathing: a systematic review and meta-analysis. *CMAJ* 2014;186(1):E25-51. doi: 10.1503/cmaj.130952.
14. Masa JF, Corral J, Pereira R, Duran-Cantolla J, Cabello M, Hernández-Blasco L, et al. Therapeutic Decision-making for Sleep Apnea and Hypopnea Syndrome Using Home

- Respiratory Polygraphy. A Large Multicentric Study. *Am J Respir Crit Care Med* 2011;184(8):964-71. doi: 10.1164/rccm.201103-0428OC.
15. Masa JF, Corral J, Sánchez de Cos J, Durán-Cantolla J, Cabello M, Hernández-Blasco L, et al. Effectiveness of three sleep apnea management alternatives. *Sleep* 2013;36(12):1799-807. doi: 10.5665/sleep.3204.
16. Rosen CL, Auckley D, Benca R, Foldvary-Schaefer N, Iber C, Kapur V, et al. A multisite randomized trial of portable sleep studies and positive airway pressure autotitration versus laboratory-based polysomnography for the diagnosis and treatment of obstructive sleep apnea: the HomePAP study. *Sleep*. 2012;35(6):757-67. doi: 10.5665/sleep.1870.
17. Kuna ST, Gurubhagavatula I, Maislin G, Hin S, Hartwing KC, McCloskey S, et al. Noninferiority of functional outcome in ambulatory management of obstructive sleep apnea. *Am J Respir Crit Care Med* 2011;183(9):1238-44. doi: 10.1164/rccm.201011-1770OC.
18. Andreu AL, Chiner E, Sancho-Chust JN, Pasto E, Llombart M, Gómez-Merino E, et al. Effect of an ambulatory diagnostic and treatment programme in patients with sleep apnoea. *Eur Respir J* 2012;39(2):305-12. doi: 10.1183/09031936.00013311.
19. Antic NA, Buchan C, Esterman A, Hensley M, Naughton MT, Rowland S, et al. A randomized controlled trial of nurse-led care for symptomatic moderate-severe obstructive sleep apnea. *Am J Respir Crit Care Med* 2009;179(6):501-8. doi: 10.1164/rccm.200810-1558OC.
20. Mulgrew AT, Fox N, Ayas NT, Ryan CF. Diagnosis and initial management of obstructive sleep apnea without polysomnography: a randomized validation study. *Ann Intern Med* 2007;146(3):157-66. doi: 10.7326/0003-4819-146-3-200702060-00004.
21. Skomro RP, Gjevre J, Reid J, McNab B, Ghosh S, Stiles M, et al. Outcomes of home-based diagnosis and treatment of obstructive sleep apnea. *Chest* 2010;138(2):257-63. doi: 10.1378/chest.09-0577.
22. Ruiz-López FJ, Fernández-Suárez B, Guardiola-Martínez J, Vergara-La Huerta I, Latour-Pérez J, Lorenzo-Cruz M. Quality control of the ambulatory polygraphy using automatic analysis. *Chest* 2009;135:194-200. doi: 10.1378/chest.08-0165.
23. Calleja JM, Esnaola S, Rubio R, Duran J. Comparison of a cardiorespiratory device versus polysomnography for diagnosis of sleep apnoea. *Eur Respir J* 2002;20:1505-10. doi: 10.1183/09031936.02.00297402.
24. Fietze I, Glos M, Röttig J, Witt C. Automated analysis of data is inferior to visual analysis of ambulatory sleep apnea monitoring. *Respiration* 2002;69:235-241. doi: 10.1159/000063626.
25. Verse T, Pirsig W, Junge-Hülsing B, Krober B. Validation of the POLY- MESAM seven-channel ambulatory recording unit. *Chest* 2000;117:1613-18. doi: 10.1378/chest.117.6.1613.
26. Carrasco O, Montserrat JM, Lloberes P, Ascascio C, Ballester E, Fornas C, et al. Visual and different automatic scoring profiles of respiratory variables in the diagnosis of sleep apnoea-hypopnoea syndrome. *Eur Respir J* 1996;9:125-30.
27. Zucconi M, Ferini-Strambi L, Castronovo V, Oldani A, Smirne S. An unattended device for sleep-related breathing disorders: validation study in suspected obstructive sleep apnoea syndrome. *Eur Respir J* 1996;9:1251-6. doi: 10.1183/09031936.96.09061251.
28. Ayappa I, Norman RG, Seelall V, Rapaport DM. Validation of a self-applied unattended monitor for sleep disordered breathing. *J Clin Sleep Med* 2008; 4:26-37.
29. Dingli K, Coleman EL, Vennelle M, Finch SP, Wraith PK, Mackay TW, et al. Evaluation of a portable device for diagnosing the sleep apnoea/hypopnoea syndrome. *Eur Respir J* 2003;21:253-9. doi: 10.1183/09031936.03.00298103.

30. Masa JF, Corral J, Pereira R, Duran-Cantolla J, Cabello M, Hernández-Blasco L, et al. Effectiveness of sequential automatic- manual home respiratory polygraphy scoring. *Eur Respir J* 2013;41:879-87. doi: 10.1183/09031936.00186811.
31. Chai-Coatzer CL, Antic NA, Rowland LS, Reed RL, Esterman A, Catcheside PG, et al. Primary care vs specialist sleep center management of obstructive sleep apnea and daytime sleepiness and quality of life: a randomized trial. *JAMA* 2013;309(10):997-1004. doi: 10.1001/jama.2013.1823.
32. Sánchez Quiroga MA, Corral J, Gómez de Terreros FJ, Carmona Bernal C, Asensio Cruz MI, Cabello M, et al. Primary care physicians can comprehensively manage patients with sleep apnea. *Am J Respir Crit Care Med* 2018;198(5):648-56. doi: 10.1164/rccm.201710-2061OC.
33. Berry RB, Hill G, Thompson L, McLaurin V. Portable monitoring and autotitration versus polysomnography for the diagnosis and treatment of sleep apnea. *Sleep* 2008;31(10):1423-31.
34. Tarraubella N, Sánchez-de-la-Torre M, Nadal N, De Batlle J, Benítez I, Cortijo A, et al. Management of obstructive sleep apnoea in a primary care vs sleep unit setting: a randomised controlled trial. *Thorax* 2018;73(12):1152-60. doi: 10.1136/thoraxjnl-2017-211237.
35. Narayan S, Shivdare P, Niranjana T, Williams K, Freudman J, Sehra R. Noncontact identification of sleep-disturbed breathing from smartphone-recorded sounds validated by polysomnography. *Sleep breath* 2019;23(1):269-79. doi: 10.1007/s11325-018-1695-6.
36. Yang X, Fan D, Ren A, Zhao N, Zhang Z, Hu F, et al. Sleep Apnea Syndrome Sensing at C-Band. *IEEE J Transl Eng Health Med* 2018;6:2701008. doi: 10.1109/JTEHM.2018.2879085. eCollection 2018.
37. Behar J, Roebuck A, Shahid M, Daly J, Hallack A, Palmius N, et al. SleepAp: an automated obstructive sleep apnoea screening application for smartphones. *IEEE J Biomed Health Inform* 2015;19(1):325-31. doi: 10.1109/JBHI.2014.2307913.
