# Supplementary material
Source: Elsevier journal article supplement (https://www.sciencedirect.com/science/article/pii/S0300289621004099)
Supplement: mmc5 [file S0300289621004099:mmc5.pdf]

## 2.3. Apnea del sueño y sus consecuencias

**Nicolás González Mangado (editor).** Jefe de Servicio de Neumología. Director de la Unidad Multidisciplinar de Sueño (UMS). Fundación Jiménez Díaz. Instituto Investigación Sanitaria FJD. Madrid. Centro de Investigación Biomédica en Red de Enfermedades Respiratorias (CIBERES), Madrid, España.

**Alberto Alonso-Fernández.** Servicio de Neumología. Hospital Universitario Son Espases. Instituto de Investigación Sanitaria de las Islas Baleares (IdISBa). CIBER Enfermedades Respiratorias (CIBERES), Madrid.

**Irene Cano-Pumarega.** Unidad de Sueño. Servicio de Neumología. Hospital Universitario Ramón y Cajal (IRYCIS). CIBER Enfermedades Respiratorias (CIBERES), Madrid.

La presencia de apnea obstructiva del sueño (AOS) se asocia a múltiples consecuencias sobre la salud, si bien algunas de ellas presentan mayor evidencia científica que otras. Los principales mecanismos fisiopatológicos que explican la asociación entre la AOS y estas consecuencias son la hipoxia intermitente y la fragmentación del sueño, si bien los cambios de presión intratorácica también intervienen en la fisiopatología de algunas enfermedades. En la **figura 1** se resumen las principales consecuencias de la AOS y los mecanismos intermedios implicados.

**Figura 1.** Consecuencias de la AOS y sus mecanismos fisiopatológicos. (Modificado y reproducido con permiso del Manual SEPAR de Neumología y Cirugía Torácica.)

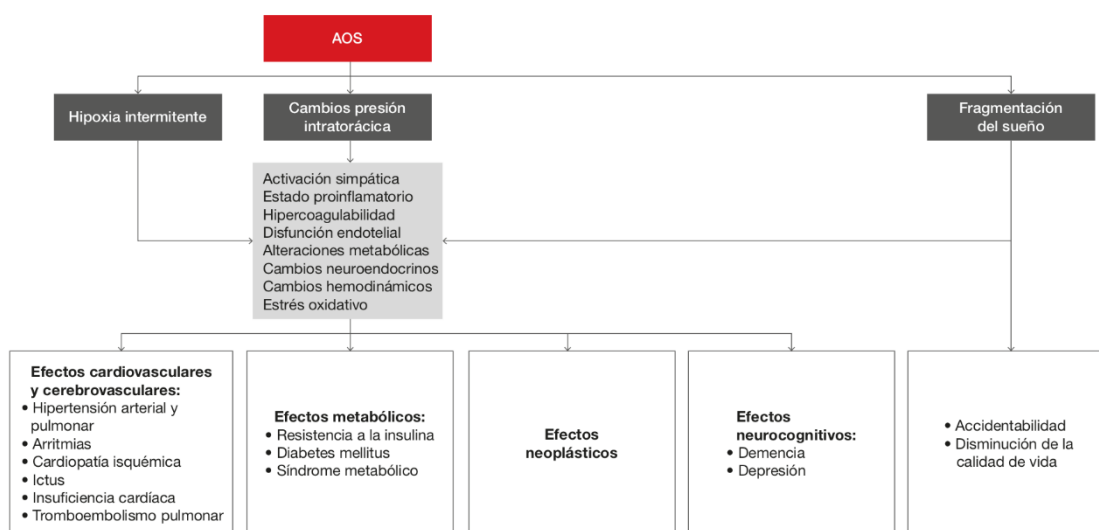

### 2.3.1. Accidentes de tráfico, domésticos y laborales

La presencia de AOS no tratada es un factor de riesgo independiente para la accidentabilidad laboral, doméstica y, sobre todo, de tráfico. Se ha estimado que la presencia de AOS aumenta entre 3 y 6 veces el riesgo de sufrir un accidente de tráfico respecto a la población general, siendo además los accidentes de mayor gravedad y con lesiones personales<sup>1,2</sup>. Asimismo, se calcula que el 7% de los accidentes de tráfico ocurridos entre la población masculina son atribuibles a la AOS<sup>3</sup>. Una revisión sistemática y un metaanálisis del riesgo de accidentes en conductores de vehículos comerciales mostraron que las características que predicen los accidentes en conductores con AOS incluyen el índice de masa corporal (IMC), el índice de apnea-hipopnea (IAH), la saturación de oxígeno y la somnolencia diurna<sup>4</sup>. No obstante, aunque los trabajos publicados presentan diferencias entre ellos, la evidencia mayoritaria establece que el riesgo de accidentes de tráfico en AOS está más relacionado con la somnolencia que con la gravedad de la enfermedad medida por el IAH. Diversos estudios observacionales han mostrado que el tratamiento de la AOS con presión positiva continua en las vías respiratorias (CPAP) disminuye significativamente el riesgo de accidentes de tráfico y los costes derivados<sup>5</sup>.

Debido a la evidencia científica que avala el mayor riesgo de accidentes de tráfico en los pacientes con AOS no tratados, la Directiva de la Unión Europea (2014/85/UE) incluye a la AOS entre los criterios de aptitud psicofísica que deben ser valorados y controlados para obtener o prorrogar el permiso de conducir. De esta forma, en España, el anexo IV del Real Decreto 818/2009 y modificado por el RD 1055/2015 establece que no podrán obtener o prorrogar un permiso de conducir quienes padezcan una AOS (diagnosticada en una Unidad de Sueño) con un IAH igual o superior a 15 episodios/h asociado a somnolencia, salvo que aporten a los centros de reconocimiento de conductores (CRC) un informe favorable de la Unidad de Sueño en el que conste: el grado de gravedad de la AOS en el momento del diagnóstico, el tipo de tratamiento pautado y que hay un adecuado nivel de cumplimiento y la existencia de un control clínico satisfactorio de los síntomas de la enfermedad<sup>6</sup>. La validez de los permisos de conducción será de un máximo de 3 años para el grupo 1 (coches, ciclomotores y motos) y de 1 año para los del grupo 2 (vehículos pesados: camiones y autobuses). Teniendo en cuenta la evidencia científica mencionada, se recomienda realizar un cribado para detectar la presencia de AOS entre la población conductora no diagnosticada por los CRC. Se ha seleccionado como método de cribado el cuestionario STOP-Bang en combinación con la escala de somnolencia de Epworth y la existencia de accidentes de tráfico relacionados con somnolencia. Deberá remitirse para estudio al médico de atención primaria según el modelo propuesto (**Figura 2**) a todos aquellos conductores con un resultado del cuestionario STOP-Bang  $\geq 3$  o a aquellos con una puntuación  $< 3$ , pero con una puntuación del test de Epworth  $> 15$  o con historia previa de un accidente de tráfico por somnolencia en los últimos 3 años.

La AOS, debido a la somnolencia diurna y a la disminución del grado de atención, también se asocia con un mayor riesgo de accidentes laborales y disminución de la

productividad laboral. Un reciente metaanálisis mostró que la *odds* de accidentabilidad laboral era el doble entre los sujetos con AOS, siendo este efecto aún mayor cuando la ocupación laboral incluía la conducción<sup>3</sup>. Por todo ello, existe la necesidad de desarrollar e implementar mejores estrategias en el cribado de la AOS entre los trabajadores, especialmente entre aquellos que utilizan vehículos y maquinaria pesada.

Finalmente, y aunque no hay datos sobre la prevalencia y la incidencia de accidentes domésticos en relación con la AOS, los datos obtenidos de la siniestralidad sugieren que cualquier actividad, y la doméstica lo es, estará influida por la pérdida de atención como consecuencia de la excesiva somnolencia diurna secundaria a la AOS y, por tanto, sometida igualmente a riesgo de siniestralidad.

**Figura 2.** Propuesta de informe a emitir por parte de los centros de reconocimiento para la derivación de conductores con sospecha de AOS para su valoración por el médico de atención primaria.

A la atención del médico de Atención Primaria \_\_\_\_\_

Se adjuntan los resultados del procedimiento de cribado de apnea obstructiva del sueño (AOS) y evaluación de la somnolencia obtenidos tras la valoración realizada en el centro de reconocimiento de conductores n.º \_\_\_\_\_ previa a la obtención/ renovación de su permiso de conducir a

D./Dña. \_\_\_\_\_  
DNI n.º \_\_\_\_\_

Stop-Bang \_\_\_\_\_

Escala de Epworth \_\_\_\_\_

Accidentes de tráfico por excesiva somnolencia diurna  
en los últimos 3 años \_\_\_\_\_

Al resultar, tras la aplicación de los criterios recomendados para la valoración de conductores, una probabilidad de padecer una AOS, ruego valoración del paciente.

En \_\_\_\_\_, a \_\_\_\_\_ de \_\_\_\_\_ de \_\_\_\_\_  
Fdo.:

### 2.3.2. Patología cardiovascular

#### Apnea obstructiva del sueño y enfermedad cardiovascular

Cada episodio de obstrucción de la vía aérea desencadena una secuencia de episodios hemodinámicos, inflamatorios y sobre el sistema autonómico potencialmente deletéreo. El esfuerzo inspiratorio en una vía aérea superior ocluida genera una presión intratorácica negativa exagerada, que aumenta la presión transmural sistólica,

incrementando la poscarga ventricular izquierda, disminuyendo la precarga ventricular izquierda y produciendo, como consecuencia, una reducción en el volumen sistólico y el gasto cardíaco<sup>7,8</sup>. Además, el aumento en la poscarga cardíaca incrementa de manera aguda la demanda miocárdica de oxígeno y este hecho, unido a la disminución de la presión parcial de oxígeno después de cada episodio de apnea-hipopnea, empeora la relación entre el suministro y la demanda de oxígeno miocárdico (**Figura 3**).

La apnea desactiva los receptores de estiramiento pulmonar y consecuentemente incrementa la actividad simpática. Además, la hipoxia e hipercapnia que acompañan a cada episodio respiratorio incrementan la actividad del sistema simpático, dando como resultado una vasoconstricción sistémica. Asimismo, cada apnea generalmente genera un *arousal* que provoca fragmentación del sueño, una mayor activación adrenérgica junto con una inhibición vagal, aumentos en la presión arterial y la frecuencia cardíaca, e incrementos de estrés oxidativo<sup>9</sup>. Todas estas alteraciones de la respiración nocturna se repiten con cada episodio de apnea/hipopnea, induciendo un aumento de mediadores inflamatorios y de estrés oxidativo que podrían generar disfunción endotelial, rigidez arterial, aterosclerosis e hipertrofia ventricular, que se proponen como mecanismos intermedios para el posterior desarrollo de hipertensión arterial (HTA) y alteraciones del metabolismo lipídico y de la glucosa, que a su vez son los principales factores de riesgo conocidos para el desarrollo de enfermedades coronarias, insuficiencia cardíaca, accidentes cerebrovasculares isquémicos o hemorrágicos, hipertensión pulmonar, tromboembolismo pulmonar, arritmias cardíacas e incluso muerte súbita, así como una peor evolución de los mismos.

**Figura 3.** Mecanismos fisiopatológicos que intervienen en la relación entre la AOS y la comorbilidad cardiovascular. AOS: apnea obstructiva del sueño; PNA: actividad parasimpática; SNA: actividad simpática; VI: ventrículo izquierdo.

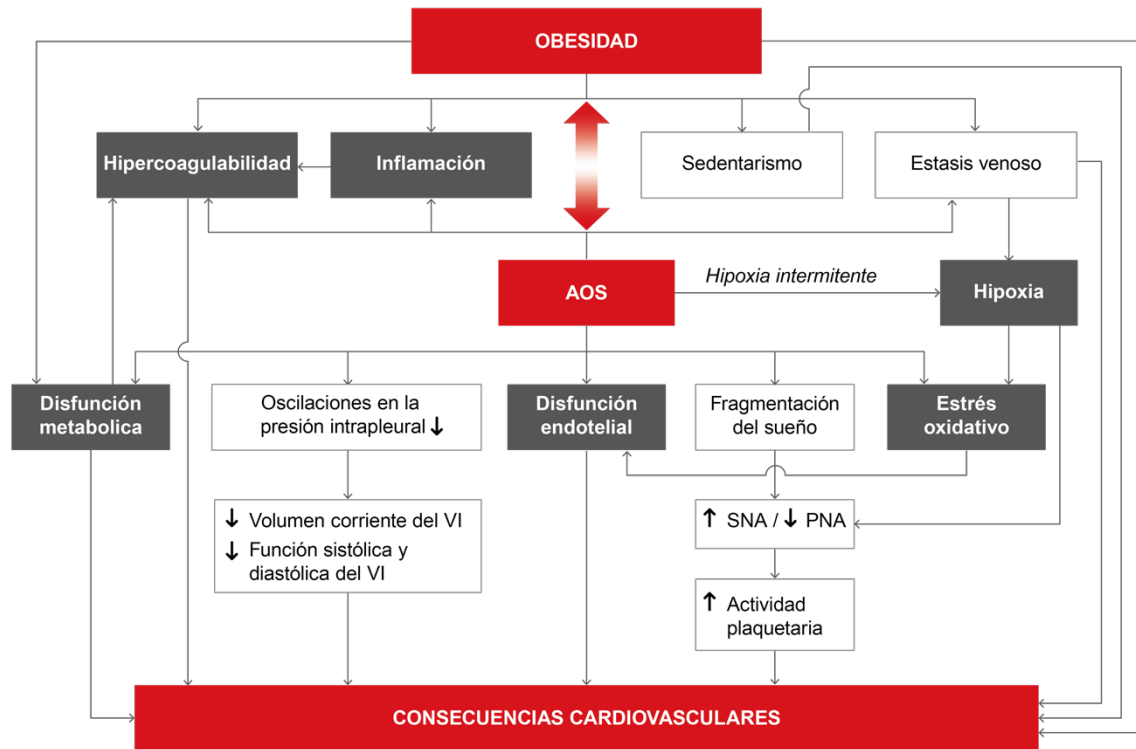

## Hipertensión y apnea obstructiva del sueño

La HTA y la AOS son dos patologías que con frecuencia coexisten. Se estima que un 50% de los pacientes con AOS moderada-grave tienen HTA y que más del 30% de los pacientes con HTA (y más del 70% de aquellos con HTA resistente) presentan una AOS<sup>10</sup>. Estudios poblacionales transversales han demostrado de forma significativa y consistente la existencia de una mayor prevalencia de HTA en pacientes con AOS en comparación con sujetos con un IAH menor de 5 h<sup>-1</sup>. Esta asociación es independiente de otros factores de riesgo asociados como la edad y la obesidad<sup>11-13</sup> y parece existir una relación dosis-respuesta, de manera que el riesgo de HTA aumenta de forma creciente a mayor gravedad de la AOS<sup>14</sup>. Por otro lado, estudios longitudinales prospectivos también han demostrado mayor riesgo de HTA incidente en pacientes con AOS con cifras normales de presión arterial previas<sup>11,15</sup>, aunque este hallazgo no se ha confirmado en todos los estudios<sup>16,17</sup>. El riesgo de HTA en los pacientes con AOS parece estar modulado por: la edad, siendo mayor el efecto en los pacientes más jóvenes<sup>18</sup>; la existencia de somnolencia, ya que en aquellos pacientes sin excesiva somnolencia diurna no parece incrementarse el riesgo de HTA de forma independiente<sup>19</sup>, y la presencia de AOS predominante en fase REM. Varios ensayos clínicos y metaanálisis muestran que el tratamiento con CPAP reduce las cifras de presión arterial, aunque las reducciones son discretas (reducción de la presión arterial sistólica en 2-2,5 mmHg y de la diastólica en 1-1,5 mmHg), pero son independientes de otros factores de confusión<sup>20-22,23</sup>, y son más acentuadas en pacientes tanto con HTA resistente como con HTA refractaria<sup>24,25</sup>. Con base en toda la evidencia disponible, la AOS se ha posicionado como la primera causa de HTA secundaria en las principales guías internacionales<sup>26</sup>.

El comportamiento *non-dipping* de la presión arterial, definida como una disminución de menos de 10% en la presión arterial nocturna, se ha asociado con incremento del riesgo de desarrollar HTA en el futuro y episodios cardiovasculares adversos. La frecuencia de varones y mujeres con un comportamiento *non-dipping* es mucho más elevada en aquellos sujetos con AOS<sup>24</sup>. Este efecto parece más marcado en el período REM, como se evidenció en un estudio que analizó específicamente la relación entre AOS en REM y la incidencia de presión arterial nocturna. En este grupo de 414 pacientes, aquellos con IAH REM > 15 h<sup>-1</sup> tuvieron un riesgo relativo mayor de nueva HTA sistólica (2,84, intervalo de confianza [IC] del 95%: 1,1-7,29) y diastólica (4,27, IC del 95%: 1,20-15,13) durante el período nocturno<sup>27</sup>. En este sentido, es de destacar que el tratamiento con CPAP ha demostrado recuperar el patrón *dipper* fisiológico de presión arterial nocturna en un porcentaje significativo de pacientes<sup>28</sup>. Los últimos datos parecen indicar que la existencia de un patrón *non-dipping* de la presión arterial es un factor importante a la hora de predecir la respuesta a la CPAP. En un análisis *post-hoc* de un ensayo clínico en 272 pacientes con HTA de reciente diagnóstico se manifestó que la reducción de la presión arterial tras 3 meses con CPAP solo se conseguía en el grupo *non-dipper*<sup>29</sup>.

En resumen, la evidencia actual disponible respalda una asociación entre la HTA y la AOS, especialmente en la HTA resistente y en aquellos pacientes con un comportamiento *non-dipping* de la presión arterial, pero falta una demostración clara de causalidad, quedando aspectos controvertidos todavía por dilucidar en esta asociación. Los resultados de los estudios longitudinales que exploran el vínculo entre la AOS y la incidencia de HTA no son consistentes y hasta la fecha no hay datos de ensayos controlados aleatorios que muestren que el tratamiento con CPAP reduce el riesgo de desarrollar HTA o la necesidad de uso de medicamentos antihipertensivos en pacientes con AOS que son hipertensos. Todavía no se ha determinado si la CPAP puede tener un efecto deletéreo sobre la presión arterial en los pacientes no cumplidores o en aquellos con un comportamiento *dipping* fisiológico de la presión arterial. Asimismo, se desconoce cuál es el régimen farmacológico antihipertensivo más eficaz en pacientes con AOS con/sin tratamiento con CPAP o si otras terapias no CPAP de la AOS pueden hacer descender las cifras tensionales de forma significativa y permanente.

### **Enfermedad cerebrovascular y apnea obstructiva del sueño**

La AOS es muy frecuente en pacientes con enfermedad cerebrovascular isquémica y embólica. Un reciente metaanálisis mostró que un 61,4% de los enfermos con ictus presentaban además una AOS, y que esta aumenta entre 2 y 3 veces el riesgo de tener un ictus<sup>30</sup>. La prevalencia es mayor en varones, en ictus de causa desconocida y en aquellos pacientes con episodios recurrentes<sup>31</sup>. La AOS, además de asociarse a inflamación, aterosclerosis, activación plaquetaria y un estado hipercoagulante, también se asocia a un mayor riesgo de fibrilación auricular y de apertura transitoria de un foramen oval, que unido a alteraciones en la perfusión cerebral durante los episodios de apneas y las potenciales disrupciones de las placas en las arterias carotídeas, como consecuencia de las vibraciones generadas por el ronquido, se han esgrimido como potencialmente mecanismos intermedios de la asociación con la enfermedad cerebrovascular.

Si bien la existencia de una asociación entre AOS e ictus prevalente es consistente, la influencia de la AOS en la incidencia de nuevos episodios de enfermedad cerebrovascular muestra datos discordantes. Una cohorte siguió durante 4 años a 1.189 pacientes, no evidenciando un riesgo significativo de tener un primer accidente cerebrovascular después de ajuste por edad, género e IMC<sup>32</sup>. Por su parte, Yaggi y cols.<sup>33</sup>, en un estudio con 1.022 pacientes, encontraron que la existencia de un IAH > 5 h<sup>-1</sup> incrementaba el riesgo de un *composite* de ataque isquémico transitorio, accidente cerebrovascular o muerte después de un promedio de 3,4 años, aunque el análisis de riesgo de forma individual de accidente cerebrovascular no aumentó por la presencia de AOS. Por otro lado, trabajos más recientes sí han demostrado que la incidencia de nuevos episodios de ictus se incrementa con la presencia previa de AOS, incluso en



pacientes ancianos<sup>34-36</sup>. Así, un metaanálisis reciente estimó que la AOS incrementa la incidencia de ictus en un 36% por cada 10 puntos de aumento en el IAH<sup>37</sup>.

Algunos trabajos muestran que la AOS condiciona mayor deterioro funcional y cognitivo y mayor mortalidad después de un accidente cerebrovascular<sup>38,39</sup>. Estudios observacionales encuentran una reducción de las tasas de recurrencia y mortalidad de enfermedad cerebrovascular en pacientes con AOS asociada y que reciben y se adhieren a tratamiento con CPAP<sup>40</sup>. Un estudio aleatorizó 140 pacientes con ictus reciente e IAH  $\geq 20$  h<sup>-1</sup> a tratamiento con CPAP o tratamiento conservador y demostró una mejoría en las escalas neurológicas 1 mes después del ictus en aquellos sujetos en la rama de CPAP. Un seguimiento de 2 años de este grupo de pacientes no demostró diferencias en la mortalidad, pero cuando se analizó la supervivencia a los 5 años, se evidenció que esta era superior en el grupo de pacientes que habían sido tratados con CPAP<sup>41</sup>. Un reciente metanálisis que incluyó cinco ensayos clínicos con seguimiento superior a 1 año, demostró una disminución de nuevos episodios de enfermedad cerebrovascular en aquellos pacientes con AOS que utilizaron la CPAP durante más de 4 horas de media durante la noche<sup>42</sup>. No obstante, el número de pacientes incluidos en ensayos clínicos todavía es muy escaso y con resultados discordantes, por lo que todavía no pueden hacerse recomendaciones al respecto, aunque sí parece más o menos claro que la CPAP mejora la recuperación tras un episodio de ictus y que si esta modalidad de tratamiento es tolerada, el nivel de adherencia a la misma es aceptable en enfermos con enfermedad cerebrovascular<sup>43</sup>.

### **Arritmias y apnea obstructiva del sueño**

La AOS se asocia con la presencia de arritmias cardíacas nocturnas. Los fenómenos de bradicardia/taquicardia son muy frecuentes durante o después de las apneas-hipopneas. La ausencia o disminución de ventilación y la estimulación hipóxica del cuerpo carotídeo es vagotónica, favoreciendo la bradicardia. Después del episodio respiratorio se produce activación simpática que predispone a la taquicardia. Además, la arritmogénesis también puede estar incrementada debido a la hipoxia intermitente, que puede provocar un retraso en la despolarización, y acidosis respiratoria que favorece mecanismos de reentrada en las vías de conducción probablemente debido a fluctuaciones del sistema nervioso autónomo<sup>44,45</sup>.

La prevalencia de trastornos del ritmo cardíaco en la AOS se sitúa en torno a un 50%, siendo los más habituales el bloqueo auriculoventricular, las pausas sinusales y las extrasístoles auriculares y ventriculares. La frecuencia de estas arritmias aumenta con la gravedad de la AOS, y sobre todo, con la gravedad de la hipoxia asociada<sup>46</sup>. Las bradiarritmias parecen tener una asociación significativa en aquellos sujetos con AOS grave y con mayor grado de afectación hipóxica. Las extrasístoles ventriculares son el tipo más común de arritmia ventricular que se encuentra en pacientes con AOS y se



observan predominantemente al final de las apneas, coincidiendo con la mayor intensidad en la desaturación de oxígeno secundaria. Aunque existen estudios que evidencian una mayor frecuencia de taquicardia ventricular no sostenida en pacientes con AOS grave frente a controles (5,3% frente a 1,2%) y ectopia ventricular compleja (25% frente a 14,5%)<sup>47</sup>, la asociación y frecuencia de las arritmias ventriculares en la AOS no está suficientemente aclarada, ya que existen trabajos con datos discordantes<sup>48</sup>. Además, se desconoce la implicación clínica de las mismas en ausencia de cardiopatía asociada y el efecto que la supresión de las apneas tiene sobre las mismas<sup>49</sup>.

La fibrilación auricular (FA) es la alteración del ritmo cardíaco mejor estudiada y la que tiene más implicaciones clínicas de las que presentan los pacientes con AOS. El 20-80% de los pacientes con FA tienen AOS, y el 3-5% de los pacientes con AOS presenta FA<sup>50</sup>, aumentándose el riesgo de FA con la gravedad de la AOS, especialmente con la intensidad de la hipoxia nocturna asociada, y en pacientes con insuficiencia cardíaca o cardiopatía isquémica asociada. La presencia de AOS también se ha asociado a un incremento en el riesgo de recurrencia de la FA después de una cardioversión eléctrica y/o ablación<sup>51</sup>. Además, la AOS se ha demostrado que aumenta el riesgo de incidencia de FA con una relación dosis-respuesta, siendo mayor en las formas más graves de AOS<sup>52</sup>.

Aunque no existen estudios controlados y aleatorizados, hay una serie de estudios observacionales que proporcionan información sobre el efecto de la CPAP sobre la FA. En pacientes con AOS y FA que se sometieron a cardioversión, los que recibieron terapia con CPAP tuvieron una recurrencia más baja de FA que los no tratados<sup>53</sup>. Otra evaluación retrospectiva mostró que los pacientes con adherencia a CPAP tuvieron una tasa de recurrencia más baja en un seguimiento medio de 2,5 años<sup>54</sup>. Coincidiendo con estos datos, dos metaanálisis recientes mostraron la existencia de una reducción de aproximadamente el 40% en el riesgo de recurrencia de FA en pacientes con AOS que reciben tratamiento con CPAP<sup>55,56</sup>. La ausencia de ensayos clínicos controlados y la posible existencia de factores de confusión residuales y sesgo de selección de subpoblaciones con perfil más adherente a también otro tipo de terapias, hace que en la actualidad no exista evidencia suficiente para recomendar el tratamiento con CPAP solo en función de la presencia de la comorbilidad FA.

### **Cardiopatía isquémica y apnea obstructiva del sueño**

La prevalencia de AOS en pacientes con enfermedad coronaria es del 38-65%. Aunque muchos estudios han mostrado la existencia de una asociación independiente entre la AOS y la cardiopatía isquémica<sup>57</sup>, la constatación en estudios prospectivos con seguimientos prolongados ha presentado resultados discrepantes<sup>58</sup>. Un trabajo que incluyó 1.651 varones seguidos durante 10 años, encontró que aquellos sujetos con una

AOS grave no tratado tenían una frecuencia más elevada de episodios cardiovasculares mortales y no mortales en comparación con pacientes con AOS leve-moderada o sin AOS. Los episodios cardiovasculares incluyeron infarto agudo de miocardio, síndrome coronario agudo e ictus, y el riesgo se mantuvo después de realizar ajustes por variables confusoras<sup>59</sup>. Por otro lado, otra cohorte incluyó 1.131 adultos sin enfermedad coronaria y fueron seguidos durante 24 años. La incidencia de cardiopatía isquémica se incrementó de forma significativa en pacientes con AOS grave no tratada, pero cuando se realizó un ajuste en función de la presencia de diabetes mellitus y/o HTA, el riesgo de nuevos episodios de enfermedad coronaria ya no alcanzaba significación estadística<sup>60</sup>. Sin embargo, otras cohortes poblacionales sí han encontrado que la AOS grave es un factor de riesgo para desarrollar síndrome coronario independiente de otros factores, aunque este riesgo no parece que se pueda aplicar a mujeres o a sujetos de más de 70 años<sup>61</sup>. Más recientemente, datos del estudio ISAAC no muestran diferencias en el número de nuevos episodios cardiovasculares durante 3 años de seguimiento de 554 pacientes con AOS moderada-grave no tratada, pero sin somnolencia, comparado con 520 sujetos con AOS leve o sin AOS<sup>62</sup>.

Otros estudios observacionales han evidenciado que la AOS puede empeorar el pronóstico de pacientes con enfermedad coronaria previa, incrementando el riesgo de nuevos episodios cardiovasculares y de reestenosis tras revascularización<sup>63,64</sup>. No obstante, no está suficientemente aclarada la influencia de la AOS en episodios isquémicos durante la noche, la función ventricular izquierda o la mortalidad cardiovascular después de tener un episodio de cardiopatía isquémica aguda.

Existen numerosos estudios observacionales con grandes tamaños muestrales y más de 10 años de seguimiento que indican un efecto beneficioso al suprimir las apneas durante el sueño<sup>59</sup>, pero la principal limitación es que al tratarse de estudios no controlados podría ser que los pacientes que se adhieren a un tratamiento con CPAP constituyan un perfil de sujetos más cumplidores de otras terapias cardiovasculares, incluyendo los consejos de hábitos de vida saludable. De hecho, los ensayos clínicos más recientes que han controlado este factor no encuentran claros efectos beneficiosos en términos de episodios cardiovasculares ni mortalidad<sup>62,65,66</sup>.

Aparte de posibles problemas metodológicos, de selección de pacientes, o de baja adherencia a la CPAP, otra posible explicación de la falta de mejoría con la CPAP es que la hipoxia intermitente característica de la AOS podría tener efectos beneficiosos, sobre todo si esta es de baja intensidad (y siempre que esté por debajo de un hipotético umbral de irreversibilidad). Este papel protector podría generar un preacondicionamiento que generaría tolerancia frente a una posterior hipoxia intermitente de mayor intensidad<sup>67</sup>. La hipoxia intermitente de baja intensidad ha demostrado que provoca el aumento de expresión de enzimas antioxidantes que se correlacionan con una protección frente al estrés oxidativo<sup>68</sup>. En modelos animales se ha visto que este tipo de hipoxia aumenta el número y la capacidad reparadora de

células endoteliales progenitoras favoreciendo la angiogénesis y la reparación cardiovascular, y en pacientes estimula la secreción del factor de crecimiento del endotelio vascular<sup>69</sup> e incrementan la movilización de células endoteliales progenitoras<sup>70</sup>, aumentando de este modo la vascularización colateral que mejoraría la perfusión miocárdica, evitando y/o protegiendo así sus consecuencias negativas cardíacas<sup>71</sup>. Así, recientemente, en un grupo de pacientes con síndrome coronario agudo se hallaron valores menos elevados de troponina I que en aquellos sujetos con AOS asociada<sup>72</sup>, y en otro trabajo se encontró una mayor frecuencia relativa de infarto agudo de miocardio sin elevación del segmento ST en pacientes con AOS moderada-grave, lo cual sugiere que los pacientes con AOS moderada a grave tienen una lesión cardíaca menos grave durante la fase aguda de un infarto agudo de miocardio<sup>73</sup>.

### **Tromboembolia pulmonar y apnea obstructiva del sueño**

Un número creciente y emergente de estudios transversales y longitudinales ha relacionado la AOS con la tromboembolia pulmonar (TEP), y han propuesto diferentes vías fisiopatológicas para explicar cómo la AOS podría aumentar el riesgo de TEP.

La relación entre ambas patologías es muy compleja y presenta muchos factores y variables de confusión aún por aclarar. Aunque la mayoría de los estudios observacionales han mostrado una asociación independiente de la influencia de la obesidad, no en todos los casos está claro si la AOS se encuentra implicada directamente en la vía patogénica o si está relacionada con comorbilidades comunes como el síndrome metabólico o la diabetes mellitus. Además, el envejecimiento es un factor de confusión importante, ya que está estrechamente relacionado con la AOS y el TEP. Sin embargo, varios estudios transversales demuestran que la AOS constituye un factor de riesgo de TEP independiente de la edad<sup>74-76</sup>. Además, existen estudios prospectivos que muestran que la AOS puede incrementar el riesgo de recurrencia de la enfermedad tromboembólica venosa y que puede estar asociada a una mayor gravedad del mismo<sup>77,78</sup>. Los datos de los que disponemos en la actualidad sugieren que la AOS está asociada a un estado procoagulante, pero las interacciones entre la AOS y cada uno de los factores de coagulación no están suficientemente claros. Además, se necesitan investigaciones más rigurosas y ensayos controlados aleatorios con suficiente poder estadístico para determinar la relación entre los factores procoagulantes individuales, la AOS y otros factores de confusión, como la obesidad, un estilo de vida sedentario y las comorbilidades metabólicas<sup>79</sup>. Actualmente se desconoce el efecto beneficioso comparativo y/o sumatorio de la pérdida de peso, modificaciones de estilos de vida más saludables y/o la CPAP en la incidencia, recurrencia o mortalidad asociada al TEP.

### **Hipertensión arterial pulmonar y apnea obstructiva del sueño**

La AOS está considerada dentro del grupo 3 de la clasificación de hipertensión arterial pulmonar (HTP)<sup>80</sup>, aunque su verdadera prevalencia es desconocida. La HTP es una enfermedad prevalente en pacientes con AOS (20-30%), pero la gravedad de la misma es leve con una presión arterial pulmonar media que oscila entre 22 y 40 mmHg y con un significado clínico incierto. La hipoxia nocturna, la edad avanzada, la enfermedad pulmonar coexistente, la obesidad y el síndrome de hipoventilación-obesidad parecen ser predictores de HTP. Sin embargo, no se ha observado una asociación significativa entre la gravedad de la AOS y el posterior desarrollo de hipertensión pulmonar<sup>81,82</sup>. Entre los mecanismos intermedios que explican la asociación de ambas patologías se han propuesto tanto mecanismos precapilares como poscapilares, el riesgo de trombosis en la circulación del pulmón, el remodelado vascular pulmonar inducido por la exposición a episodios repetidos de cambios en la presión pleural y la hipoxia intermitente. Estudios observacionales sugieren que el tratamiento con CPAP de pacientes con AOS e HTP mejora la función cardíaca derecha y reduce las presiones pulmonares, y un ensayo aleatorizado cruzado que evaluó la CPAP frente a la *sham* CPAP determinó que la terapia con CPAP reduce la presión arterial pulmonar en 6 mmHg de media, aunque esta reducción fue mayor en pacientes con HTP y con disfunción diastólica del ventrículo izquierdo<sup>83</sup>. Actualmente no existe evidencia suficiente para recomendar investigar la existencia de HTP en pacientes con AOS. Por el contrario, sí se recomienda descartar AOS en el estudio de pacientes con HTP si existe una clara sospecha clínica y, en caso de diagnosticarse, iniciar tratamiento con CPAP<sup>80</sup>.

### **Insuficiencia cardíaca y apnea obstructiva del sueño**

La prevalencia de trastornos respiratorios del sueño en el síndrome de insuficiencia cardíaca (ICC) está en el 50-75% y es similar tanto en la insuficiencia cardíaca estable con fracción de eyección preservada (HF-pEF) como en la reducida (HF-rEF). Tanto la AOS como el síndrome de apnea central del sueño (SACS) se observan en pacientes con insuficiencia cardíaca, aunque la AOS es preponderante en HF-pEF, y el SACS con respiración de Cheyne-Stokes es más común en aquellos con HF-rEF. Por otro lado, la prevalencia de insuficiencia cardíaca en pacientes con AOS es el doble que la de grupos de controles sanos<sup>84</sup>. Actualmente se conoce que la existencia de una AOS grave no tratada condiciona un riesgo de desarrollar ICC, tal y como han puesto de manifiesto los datos procedentes de las grandes cohortes del *Sleep Heart Health Study*, en un seguimiento a 8 años de 4.422 sujetos<sup>85</sup>, y del *Wisconsin Sleep Cohort study*, con 1.131 sujetos y 24 años de seguimiento<sup>86</sup>.

Estudios realizados en pacientes que reciben tratamiento con  $\beta$ -bloqueantes +/- desfibriladores automáticos demuestran un peor pronóstico en aquellos sujetos con insuficiencia cardíaca en los que además coexisten AOS o SACS moderado-grave, llegando a duplicar la mortalidad si el trastorno respiratorio del sueño no es tratado<sup>87,88</sup>, aunque esta tendencia parece mejorar cuando AOS/SACS son correctamente

tratados<sup>88,89</sup>. No obstante, aunque algunos ensayos aleatorizados con poco tiempo de seguimiento han mostrado reducciones de la presión arterial, del tono simpático y una mejoría en la fracción de eyección del ventrículo izquierdo y la calidad de vida en estos pacientes, los ensayos aleatorizados multicéntricos con mayor tiempo de seguimiento no han detectado que el tratamiento de los trastornos respiratorios del sueño en la insuficiencia cardíaca mejore la supervivencia de la misma<sup>90,91</sup>.

### **2.3.3. Alteraciones metabólicas**

#### **Diabetes mellitus y apnea obstructiva del sueño**

La AOS se asocia con alteraciones en el metabolismo de la glucosa, siendo la diabetes mellitus tipo 2 (DM2) su principal manifestación. Alteraciones del eje hipotálamo-hipofisario-adrenal, incrementos en la actividad simpática, inflamatoria, del estrés oxidativo y en la liberación de adipocinas secundarias a la hipoxia intermitente y la fragmentación del sueño han sido postulados como los principales mecanismos patogénicos. La prevalencia de AOS en pacientes con DM2 es muy elevada (60-85%) y se ha mostrado que el riesgo de tener AOS es independiente del género, la edad y del IMC. Igualmente, un metaanálisis reciente ha evidenciado que la AOS también constituye un factor de riesgo independiente de desarrollar DM2, que se incrementa si además existe excesiva somnolencia diurna o un mayor grado de hipoxemia nocturna, aunque este riesgo es bajo<sup>92,93</sup>. La relación entre la AOS y la DM2 podría tener una naturaleza bidireccional, dado que la neuropatía diabética puede afectar al control central de la respiración y los reflejos neurales de las vías respiratorias superiores, que podría conducir a alteraciones en la respiración durante el sueño<sup>94</sup>.

Los pacientes con DM2 y AOS parece que tienen un peor control metabólico, aunque se desconoce si esto condiciona la aparición de más riesgo de complicaciones a medio-largo plazo. El cumplimiento adecuado del tratamiento con CPAP mejora la resistencia a la insulina de pacientes con AOS y podría contribuir a un mejor control glucémico a medio plazo<sup>95, 96</sup>. No obstante, no todos los ensayos clínicos han mostrado resultados beneficiosos respecto a la mejoría de los niveles de glucemia, sobre todo si la adherencia a la CPAP no es adecuada<sup>97,98, 99</sup>.

#### **Síndrome metabólico y apnea obstructiva del sueño**

El síndrome metabólico (SM) caracterizado por obesidad abdominal, HTA, dislipidemia y resistencia insulínica constituye un claro factor de riesgo para presentar DM2, complicaciones cardiovasculares y de mortalidad en la población general<sup>100</sup>. Estudios epidemiológicos han mostrado que la prevalencia de SM en pacientes con AOS es 6-9 veces más frecuente que en la población general, aconteciendo además el pico de máxima prevalencia de SM en la 5.<sup>a</sup> década en varones y en la 6.<sup>a</sup> en mujeres, que

coincide con los períodos de mayor prevalencia de la AOS. De la misma manera que ocurre con las complicaciones cardiovasculares, la existencia de excesiva somnolencia durante el día parece ser un factor de riesgo adicional para tener SM en la AOS<sup>101</sup>. A pesar de que la supresión de apneas-hipopneas mediante CPAP ha mostrado que puede disminuir la presión arterial y los síntomas asociados a la AOS, no se dispone de evidencia de que también disminuya el porcentaje de SM<sup>102</sup>. Asimismo, se postula que la asociación entre SM y AOS podría ser bidireccional. Así, la obesidad visceral y la resistencia a la insulina, determinadas por factores genéticos y ambientales, son un mecanismo importante en la génesis de la AOS. A su vez, la obesidad central y la inflamación pueden favorecer el estrechamiento de las vías respiratorias superiores, fatiga muscular respiratoria y disminución de la contracción del músculo dilatador. Además, estos mecanismos podrían proporcionar una explicación de por qué los tratamientos mecánicos, o cirugías de las vías respiratorias superiores, a menudo no tienen éxito en revertir el síndrome metabólico a menos que se combinen con la pérdida de peso.

#### **2.3.4. Apnea obstructiva del sueño y cáncer**

La posible relación entre la AOS y el cáncer ha sido la consecuencia que probablemente mayor interés ha suscitado en la última década. Los mecanismos fisiopatológicos descritos que podrían dar plausibilidad biológica a la relación entre la AOS y la transformación de células sanas en malignas o la diseminación y el crecimiento tumoral son, fundamentalmente, la hipoxia intermitente y la fragmentación del sueño, habiéndose también descrito otros mecanismos implicados como el estrés oxidativo, la existencia de un mayor grado de inflamación sistémica y diversas alteraciones en el sistema inmunitario<sup>103</sup> (**Figura 4**).

**Figura 4.** Mecanismos fisiopatológicos que intervienen en la relación entre la AOS y el cáncer. AOS: apnea obstructiva del sueño; HIF-1: factor inducido por la hipoxia 1; VEGF: factor de crecimiento del endotelio vascular. (Modificado y reproducido con permiso del Manual SEPAR de Neumología y Cirugía Torácica.)

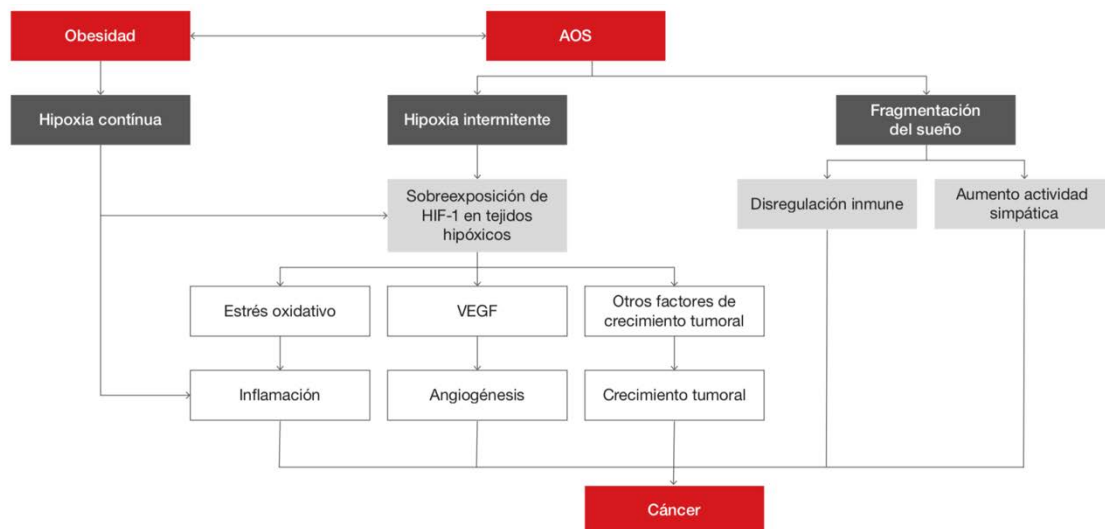

Estudios experimentales *in vitro* y sobre modelos animales mostraron que exposiciones controladas a hipoxia intermitente y fragmentación del sueño podían inducir estrés oxidativo e inflamación sistémica, que podían aumentar la velocidad de crecimiento y la capacidad metastásica de varios tumores<sup>104,105</sup>. Estos resultados positivos, que apoyaban las hipótesis fisiopatológicas existentes, animaron a la comunidad científica a seguir investigando sobre esta relación.

Los dos primeros estudios publicados en humanos, uno sobre mortalidad por cáncer<sup>106</sup> y otro de incidencia de cáncer<sup>107</sup>, mostraron que, a mayor gravedad de la AOS, mayor era el riesgo de muerte por cáncer y de aparición de un nuevo tumor. En ambos estudios se evidenció que este riesgo era aún mayor teniendo en cuenta los valores de hipoxemia nocturna que los valores de IAH, y el riesgo de incidencia de cáncer parecía ser mayor en los pacientes más jóvenes. Posteriormente, surgieron varios estudios que estudiaron la relación entre la incidencia del cáncer y la presencia de AOS, llevados a cabo tanto en población general como clínica y con resultados contradictorios<sup>108-111</sup>. Entre las posibles explicaciones para estas discrepancias se encuentran las limitaciones metodológicas inherentes a estos estudios, ya que no habían sido diseñados específicamente para estudiar esta asociación, no se valoró la hipoxia intermitente de forma adecuada, no se analizaron tumores concretos, no se consideró adecuadamente la presencia e influencia de otros factores de confusión (obesidad, tiempo de sueño), no disponían de suficiente potencia estadística para analizar ciertos subgrupos de interés (edad, género) y no se valoró de forma adecuada el efecto del tratamiento de la AOS sobre el cáncer<sup>112</sup>. En este contexto surge el primer estudio prospectivo diseñado para estudiar la asociación entre la gravedad de la AOS y la gravedad de un tipo concreto de cáncer, el melanoma cutáneo<sup>112</sup>. En este estudio se incluyeron a 443 pacientes diagnosticados de melanoma a los que se realizó una poligrafía respiratoria. Al comparar a los pacientes de los terciles superiores respecto a los inferiores tanto de IAH como de índice de desaturación de oxígeno, se evidenció que aquellos más graves presentaban



mayor riesgo de agresividad del melanoma, siendo esta asociación más evidente en los pacientes más jóvenes. Posteriormente se han publicado varios trabajos que estudian la relación entre la AOS y el cáncer de pulmón que sugieren una mayor prevalencia de este tipo de cáncer entre los sujetos con AOS<sup>113</sup>, otros que indican un mayor riesgo de presentar carcinoma colorrectal<sup>114</sup> o una mayor prevalencia de AOS en los sujetos con cáncer de cabeza y cuello<sup>115</sup>. Nuevos estudios prospectivos y multicéntricos que valoren el pronóstico y la progresión del cáncer, la mortalidad, la relación existente con nuevos tipos de cáncer, el papel de los biomarcadores y el efecto de la CPAP, son necesarios para comprender mejor la relación entre ambas patologías.

### **2.3.5. Apnea obstructiva del sueño y esfera neurocognitiva**

#### **Neurodegeneración**

La prevalencia de afectación cognitiva en la AOS varía ampliamente según los estudios disponibles con valores que oscilan entre el 2,5% y el 50%. Las principales funciones cognitivas que se han descrito alteradas en la AOS son las de atención, función ejecutiva, memoria y velocidad psicomotora, mientras que otros dominios como el lenguaje parecen estar relativamente preservados<sup>116-118</sup>. En los pacientes ancianos con AOS, aunque el dominio de las funciones ejecutivas sigue siendo el más alterado, el dominio de la memoria se puede ver más afectado que en el paciente joven, siendo además más grave como consecuencia de la presencia de comorbilidades, polimedicación o deterioro relacionado con la edad y, por lo tanto, más difícil de revertir con tratamiento<sup>119</sup>.

Los mecanismos fisiopatológicos por los que la AOS puede producir deterioro cognitivo no son del todo conocidos, aunque se especula que puedan ser semejantes a los descritos en las enfermedades cardiovasculares. Así, la hipoxia intermitente, el estado proinflamatorio y el estrés oxidativo ocasionados por la AOS se han relacionado con un mayor grado de hipoperfusión cerebral, disfunción endotelial, neuroinflamación, incremento de la proteína  $\beta$ -amiloide ( $A\beta 40$  y  $A\beta 42$ ) y mayor fosforilación de la proteína tau, todo ello relacionado con mayor probabilidad de padecer enfermedad de Alzheimer (EA) y otros tipos de demencias<sup>120</sup>. Asimismo, la fragmentación del sueño y sus consecuencias diurnas se han relacionado con un deterioro cognitivo marcado, en especial en ancianos, pudiendo ser ésta una de las formas clínicas de presentación de la AOS en edades avanzadas<sup>121,122</sup> (**Figura 5**).

**Figura 5.** Mecanismos fisiopatológicos que intervienen en la relación entre la AOS y la comorbilidad neurocognitiva. AOS: apnea obstructiva del sueño.

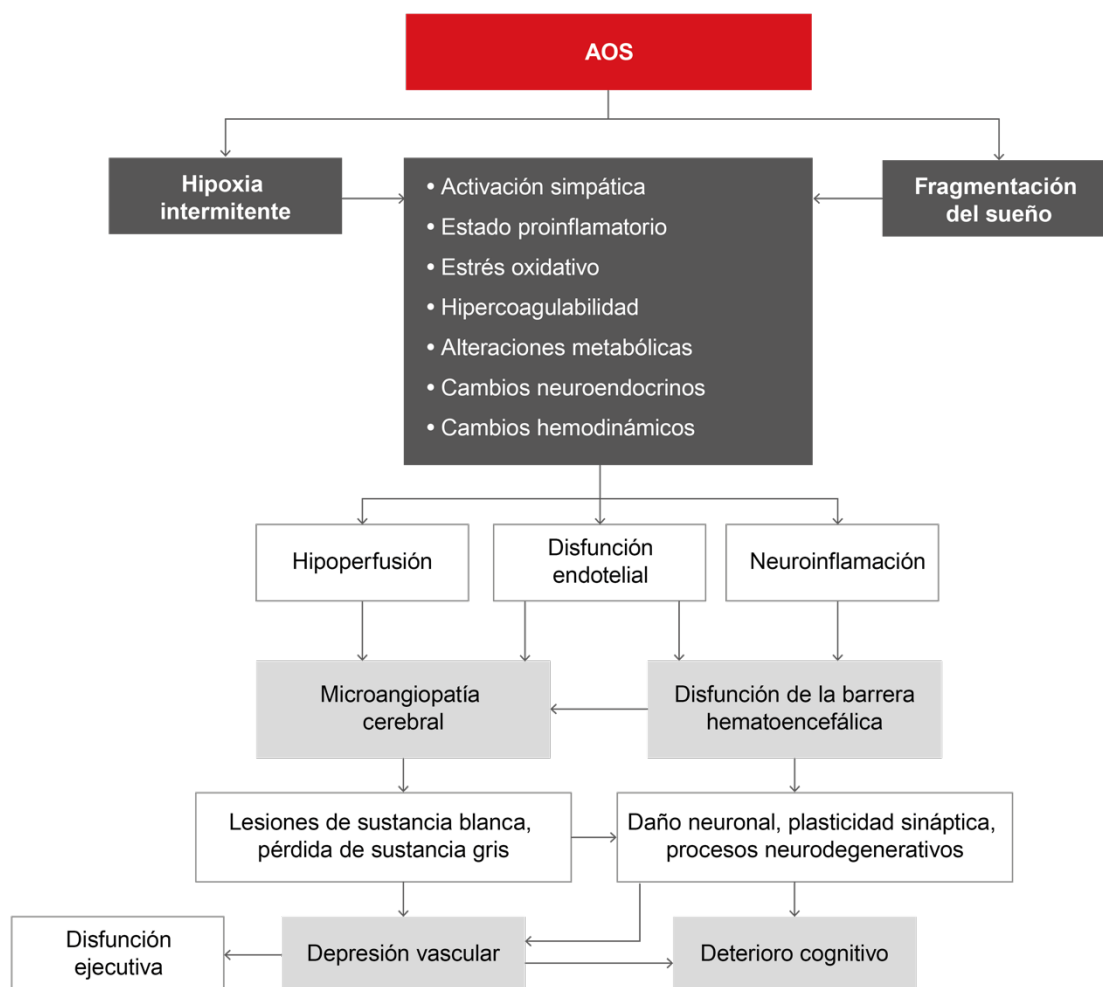

La evidencia de los estudios epidemiológicos en animales y en humanos sugiere una relación independiente entre la AOS y la EA. Los resultados de un metaanálisis que estudió la relación entre ambas patologías indican que los pacientes con EA tienen 5 veces mayor probabilidad de tener una AOS que los pacientes de la misma edad con función cognitiva conservada y que un 50% de los pacientes con EA habían presentado una AOS tras el diagnóstico inicial de la EA<sup>123</sup>. La afectación del sueño que caracteriza a la AOS provoca un mayor deterioro cognitivo (principalmente de la función ejecutiva, memoria y de la atención en adultos de edad media) y mayor somnolencia y deterioro cognitivo en la EA <sup>124</sup>. Además, se ha sugerido que la AOS podría empeorar el curso clínico de la EA e inducir la aparición más temprana del deterioro cognitivo, pudiéndose retrasar o revertir este efecto, al menos parcialmente, tras el tratamiento con CPAP<sup>122,125, 124</sup>.

Los niveles plasmáticos de proteína  $\beta$ -amiloide 1-40 se han correlacionado positivamente con la gravedad en pacientes con AOS<sup>126</sup>. La hipoxia estimula la producción del factor inducible por la hipoxia 1 alfa (HIF1 $\alpha$ ), el cual activaría varios tipos

de secretasas que favorecerían la vía amiloidógena de producción de  $\beta$ -amilode<sup>126,127</sup>. Por otro lado, la reducción de la actividad del sueño de ondas lentas y la fragmentación del mismo secundarias a la AOS, alteran los mecanismos de aclaramiento del  $\beta$ -amilode cerebral favoreciendo su depósito, especialmente en corteza prefrontal y entorrinal, acelerando el deterioro cognitivo<sup>127,128</sup>.

El efecto de la CPAP sobre las alteraciones neurocognitivas de la AOS es controvertido y depende de muchos factores relacionados con el individuo y con la propia enfermedad que genera el déficit cognitivo. En términos generales, el uso de la CPAP de al menos 4 h/noche es capaz de mejorar precozmente la atención, la función ejecutiva y la memoria verbal tras 2-3 meses de tratamiento, especialmente en los pacientes con AOS grave<sup>129</sup>. Cuando el uso es de al menos 6 h diarias, la CPAP proporciona mayor grado de mejoría de la función neurocognitiva en aquellos pacientes con alteraciones cognitivas leves secundarias a la edad, otras comorbilidades o a demencias como la EA<sup>130</sup>. Por ello, hay que enfatizar la importancia de un diagnóstico y tratamiento precoz en las fases iniciales de la EA. Ninguno de los cuestionarios de cribado para AOS estudiados en la EA (STOP-Bang y cuestionario de Berlín) ha demostrado ser una buena herramienta para la detección de AOS en esta población, si bien una versión modificada del STOP-Bang podría incrementar la detección del riesgo de AOS en la EA<sup>131</sup>.

Asimismo, el aumento de actividad de sueño de ondas lentas tras tratamiento con CPAP se ha asociado a una reducción estadísticamente significativa de niveles de  $\beta$ -amilode 40 en líquido cefalorraquídeo respecto a valores previos al tratamiento<sup>132</sup>.

## Depresión

Diversos estudios epidemiológicos apoyan una relación bidireccional entre la AOS y los trastornos del ánimo, particularmente la depresión. Los mecanismos fisiopatológicos por los que la AOS puede producir alteraciones del estado de ánimo tampoco son del todo conocidos, aunque se especulan mecanismos similares a los descritos en las alteraciones cognitivas, con un papel fundamental de la hipoxia intermitente, la inflamación sistémica y el estrés oxidativo (Figura 5). La probabilidad de que un paciente con AOS desarrolle depresión es 2 veces mayor que en aquellos sin AOS, aumentando el riesgo conforme aumenta la gravedad de la AOS y siendo este riesgo particularmente evidente en las mujeres<sup>133</sup>. La prevalencia de depresión en las mujeres con AOS se sitúa en un 35% comparado con el 12-25% en el caso de los hombres<sup>134-136</sup>. Asimismo, la prevalencia de síntomas de ansiedad en pacientes con AOS se sitúa en torno al 32%<sup>137</sup>. Por otro lado, el riesgo de que un paciente con depresión presente una AOS es también elevado, siendo 5 veces mayor en caso de depresión mayor<sup>121</sup>. En este caso, esta relación puede ser facilitada por la toma de depresores respiratorios (en especial

los derivados benzodiazepínicos) y por la ganancia ponderal observada en pacientes con depresión.

Las revisiones sistemáticas de ensayos clínicos aleatorizados arrojan resultados discordantes sobre el efecto de la CPAP en los síntomas depresivos, si bien estas diferencias pueden ser explicadas por diferencias en los diseños de los estudios, muestras pequeñas, diferencias de edad, cortos períodos de seguimiento y la no inclusión específica de pacientes con ansiedad o depresión en estos estudios<sup>138,139, 140</sup>. No obstante, estudios recientes llevados a cabo en subpoblaciones específicas de AOS muestran que el tratamiento con CPAP (especialmente cuando el uso es >4h/noche), se asocia a una mejoría significativa de los síntomas depresivos, lo que apoya la relación entre la AOS y la depresión<sup>141</sup>. Estudios realizados en mujeres muestran que el tratamiento con CPAP durante 3 meses en AOS moderadas-graves presenta una mejoría significativa de los síntomas de ansiedad y depresión comparado con el tratamiento conservador, si bien esta terapia no mejora los biomarcadores de inflamación, actividad antioxidante y depresión<sup>142,143</sup>. Estudios realizados en población anciana ( $\geq 70$  años) muestran una mejoría en los síntomas de depresión tras 3 meses de tratamiento con CPAP en los pacientes con AOS grave, pero no evidencian tal mejoría en el caso de los pacientes con AOS moderada<sup>144,145</sup>. Por último, recientes análisis de las poblaciones del estudio SAVE y RICCADSA con enfermedad cardiovascular previa, mostraron que el tratamiento con CPAP de los pacientes incluidos en estos estudios (AOS moderadas-graves) mejoraron los síntomas depresivos, de forma independiente a la mejoría en la somnolencia, pero no los de ansiedad<sup>146, 147</sup>.

## BIBLIOGRAFÍA:

1. Terán-Santos J, Jiménez-Gómez A, Cordero-Guevara J. The association between sleep apnea and the risk of traffic accidents. Cooperative Group Burgos-Santander. *N Engl J Med* 1999;340(11):847-51. doi: 10.1056/NEJM199903183401104.
2. Mulgrew AT, Nasvadi G, Butt A, Cheema R, Fox N, Fleetham JA, et al. Risk and severity of motor vehicle crashes in patients with obstructive sleep apnoea/hypopnoea. *Thorax* 2008;63(6):536-41. doi: 10.1136/thx.2007.085464.
3. Garbarino S, Pitidis A, Giustini M, Taggi F, Sanna A. Motor vehicle accidents and obstructive sleep apnea syndrome: A methodology to calculate the related burden of injuries. *Chron Respir Dis* 2015;12(4):320-8. doi: 10.1177/1479972315594624.
4. Tregear S, Reston J, Schoelles K, Phillips B. Obstructive sleep apnea and risk of motor vehicle crash: systematic review and meta-analysis. *J Clin Sleep Med* 2009;5(6):573-81. PubMed PMID: 20465027; PubMed Central PMCID:PMC2792976.
5. Tregear S, Reston J, Schoelles K, Phillips B. Continuous Positive Airway Pressure Reduces Risk of Motor Vehicle Crash among Drivers with Obstructive Sleep Apnea: Systematic Review and Meta-analysis. *Sleep* 2010;33(10):1373-80. doi: 10.1093/sleep/33.10.1373.
6. Terán-Santos J, Egea Santaolalla C, Montserrat JM, Masa Jiménez F, Librada Escribano MV, et al. Sleep Apnea and Driving. Recommendations for Interpreting Spanish Regulations for Drivers. *Arch Bronconeumol* 2017;53(6):336-41. doi: 10.1016/j.arbres.2016.11.007.
7. Tilkian AG, Guilleminault C, Schroeder JS, Lehrman KL, Simmons FB, Dement WC. Hemodynamics in sleep-induced apnea. Studies during wakefulness and sleep. *Ann Intern Med* 1976;85:714-9. doi: 10.1152/jappl.1995.79.2.455.
8. Levy PA, Guilleminault C, Fagret D, Gaio JM, Romand P, Bonnet C, et al. Changes in left ventricular ejection fraction during REM sleep and exercise in chronic obstructive pulmonary disease and sleep apnoea syndrome. *Eur Respir J* 1991;4:347-52. PubMed PMID: 1864350.
9. Alonso-Fernández A, García-Río F, Arias MA, Hernanz A, de la Pena M, Pierola J, et al. Effects of CPAP on oxidative stress and nitrate

- efficiency in sleep apnoea: a randomised trial. *Thorax* 2009;64:581-6. doi: 10.1136/thx.2008.100537.
10. Van Ryswyk E, Mukherjee S, Chai-Coetzer CL, Vakulin A, McEvoy RD. Sleep Disorders, Including Sleep Apnea and Hypertension. *Am J Hypertens* 2018;31:857-64. doi: 10.1093/ajh/hpy082.
11. Peppard PE, Young T, Palta M, Skatrud J. Prospective study of the association between sleep-disordered breathing and hypertension. *N Engl J Med* 2000;342:1378-84. doi: 10.1056/NEJM200005113421901.
12. Nieto FJ, Young TB, Lind BK, Shahar E, Samet JM, Redline S, et al. Association of sleep-disordered breathing, sleep apnea, and hypertension in a large community-based study. Sleep Heart Health Study. *JAMA* 2000;283:1829-36. doi: 10.1001/jama.283.14.1829.
13. Bixler EO, Vgontzas AN, Lin HM, Ten Have T, Leiby BE, Vela-Bueno A, et al. Association of hypertension and sleep-disordered breathing. *Arch Intern Med* 2000;160:2289-95. doi: 10.1001/archinte.160.15.2289.
14. Xia W, Huang Y, Peng B, Zhang X, Wu Q, Sang Y, et al. Relationship between obstructive sleep apnoea syndrome and essential hypertension: a dose-response meta-analysis. *Sleep Med* 2018;47:11-8. doi: 10.1016/j.sleep.2018.03.016.
15. Marín JM, Agustí A, Villar I, Forner M, Nieto D, Carrizo SJ, et al. Association between treated and untreated obstructive sleep apnea and risk of hypertension. *JAMA*;307:2169-76. doi: 10.1001/jama.2012.3418.
16. O'Connor GT, Caffo B, Newman AB, Quan SF, Rapoport DM, Redline S, et al. Prospective study of sleep-disordered breathing and hypertension: the Sleep Heart Health Study. *Am J Respir Crit Care Med* 2009;179:1159-64. doi: 10.1164/rccm.200712-1809OC.
17. Cano-Pumarega I, Durán-Cantolla J, Aizpuru F, Miranda-Serrano E, Rubio R, Martínez-Null, et al. Obstructive sleep apnea and systemic hypertension: longitudinal study in the general population: the Vitoria Sleep Cohort. *Am J Respir Crit Care Med* 2011;184(11):1299-304. doi: 10.1164/rccm.201101-0130OC.
18. Vgontzas AN, Li Y, He F, Fernández-Mendoza J, Gaines J, Liao D, et al. Mild-to-moderate sleep apnea is associated with incident hypertension: age effect. *Sleep* 2019;42(4):zsy265. doi: 10.1093/sleep/zsy265.

19. Mazzotti DR, Keenan BT, Lim DC, Gottlieb DJ, Kim J, Pack AI. Symptom Subtypes of Obstructive Sleep Apnea Predict Incidence of Cardiovascular Outcomes. *Am J Respir Crit Care Med* 2019;200:493-506. doi: 10.1164/rccm.201808-1509OC.
20. Montesi SB, Edwards BA, Malhotra A, Bakker JP. The effect of continuous positive airway pressure treatment on blood pressure: a systematic review and meta-analysis of randomized controlled trials. *J Clin Sleep Med* 2001;8:587-96. doi: 10.5664/jcsm.2170.
21. Becker HF, Jerrentrup A, Ploch T, Grote L, Penzel T, Sullivan CE, et al. Effect of nasal continuous positive airway pressure treatment on blood pressure in patients with obstructive sleep apnea. *Circulation* 2003;107:68-73. doi: 10.1161/01.cir.0000042706.47107.7a.
22. Dimsdale JE, Lored JS, Profant J. Effect of continuous positive airway pressure on blood pressure: a placebo trial. *Hypertension* 2000; 35:144-7. doi: 10.1161/01.hyp.35.1.144.
23. Javaheri S, Gottlieb DJ, Quan SF. Effects of continuous positive airway pressure on blood pressure in obstructive sleep apnea patients: The Apnea Positive Pressure Long-term Efficacy Study (APPLES). *J Sleep Res* 2020;29:e12943. doi: 10.1111/jsr.12943.
24. Jenner R, Fatureto-Borges F, Costa-Hong V, Lopes HF, Teixeira SH, Marum E, et al. Association of obstructive sleep apnea with arterial stiffness and nondipping blood pressure in patients with hypertension. *J Clin Hypertens (Greenwich)* 2017;19:910-8. doi: 10.1111/jch.13008.
25. Navarro-Soriano C, Martínez-García MA, Torres G, Barbé F, Caballero-Eraso C, Lloberes P et al. Effect of continuous positive airway pressure in patients with true refractory hypertension and sleep apnea: a post-hoc intention-to-treat analysis of the HIPARCO randomized clinical trial. *J Hypertens* 2019;37:1269-75. doi: 10.1097/HJH.0000000000002053.
26. Williams B, Mancia G, Spiering W, Agabiti Rosei E, Azizi M, Burnier M, et al. ESC Scientific Document Group . 2018 ESC/ESH Guidelines for the management of arterial hypertension. *Eur Heart J* 2018;39:3021-104. doi: 10.1093/eurheartj/ehy339.
27. Mokhlesi B, Hagen EW, Finn LA, Hla KM, Carter JR, Peppard PE. Obstructive sleep apnoea during REM sleep and incident non-dipping of nocturnal blood pressure: a longitudinal analysis of the



- Wisconsin Sleep Cohort. *Thorax* 2015;70:1062-9. doi: 10.1136/thoraxjnl-2015-207231.
28. Martínez-García M-A, Capote F, Campos-Rodríguez F, Lloberes P, Díaz de Atauri MJ, Somoza M, et al, Spanish Sleep Network. Effect of CPAP on blood pressure in patients with obstructive sleep apnea and resistant hypertension: the HIPARCO randomized clinical trial. *JAMA* 2013;310:2407-15. doi: 10.1001/jama.2013.281250.
  29. Sapiña-Beltrán E, Torres G, Benítez I, Santamaría-Martos F, Durán-Cantolla J, Egea C, et al. Differential blood pressure response to continuous positive airway pressure treatment according to the circadian pattern in hypertensive patients with obstructive sleep apnoea. *Eur Respir J* 2019;54:1900098. doi: 10.1183/13993003.00098-2019.
  30. Dong R, Dong Z, Liu H, Shi F, Du J. Prevalence, Risk Factors, Outcomes, and Treatment of Obstructive Sleep Apnea in Patients with Cerebrovascular Disease: A Systematic Review. *J Stroke Cerebrovasc Dis* 2018;27:1471-80. doi: 10.1016/j.jstrokecerebrovasdis.2017.12.048.
  31. Rola R, Jarosz H, Wierzbicka A, Wichniak A, Richter P, Ryglewicz D, et al. Sleep disorder breathing and recurrence of cerebrovascular events, case-fatality, and functional outcome in patients with ischemic stroke or transient ischemic attack. *J Physiol Pharmacol* 2008;59(Suppl 6):615-21.
  32. Arzt M, Young T, Finn L, Skatrud JB, Bradley TD. Association of sleep disordered breathing and the occurrence of stroke. *Am J Respir Crit Care Med* 2005;172:1447-51. doi: 10.1164/rccm.200505-702OC.
  33. Yaggi HK, Concato J, Kernan WN, Lichtman JH, Brass LM, Mohsenin V. Obstructive sleep apnea as a risk factor for stroke and death. *N Engl J Med* 2005;353:2034-41. doi: 10.1056/NEJMoa043104.
  34. Valham F, Moee T, Rabben T, Stenlund H, Wiklund U, Franklin KA. Increased risk of stroke in patients with coronary artery disease and sleep apnea: a 10-year follow-up. *Circulation* 2008;118:955-60. doi: 10.1161/CIRCULATIONAHA.108.783290.
  35. Catalan-Serra P, Campos-Rodríguez F, Reyes-Nuñez N, Selma Ferrer MJ, Navarro-Soriano C, Ballester-Canelles M et al. Increased Incidence of Stroke, but Not Coronary Heart Disease, in Elderly

- Patients With Sleep Apnea. *Stroke* 2019;49:1-94. doi: 10.1161/STROKEAHA.118.023353.
36. Redline S, Yenokyan G, Gottlieb DJ, Shahar E, O'Connor GT, Resnick HE, et al. Obstructive sleep apnea-hypopnea and incident stroke: the sleep heart health study. *Am J Respir Crit Care Med* 2010;182:269-77. doi: 10.1164/rccm.200911-1746OC.
37. Loke YK, Brown JWL, Kwok CS, Niruban A, Myint PK. Association of Obstructive Sleep Apnea With Risk of Serious Cardiovascular Events. *Circ Cardiovasc Qual Outcomes* 2012;5:720-8. doi: 10.1161/CIRCOUTCOMES.111.964783.
38. Sahlin C, Sandberg O, Gustafson Y, Bucht G, Carlberg B, Stenlund H, et al. Obstructive sleep apnea is a risk factor for death in patients with stroke: a 10-year follow-up. *Arch Intern Med* 2008;168:297-301. doi: 10.1001/archinternmed.2007.70.
39. Kang DO, Kim CK, Park Y, Jang WY, Kim W, Choi JY et al. Impact of Sleep-Disordered Breathing on Functional Outcomes in Ischemic Stroke: A Cardiopulmonary Coupling Analysis. *Stroke* 2020;51:2188-96. doi: 10.1161/STROKEAHA.119.028730.
40. Haba-Rubio J, Vujica J, Franc Y, Michel P, Heinzer R. Effect of CPAP Treatment of Sleep Apnea on Clinical Prognosis After Ischemic Stroke: An Observational Study. *J Clin Sleep Med* 2019;15:839-47. doi: 10.5664/jcsm.7832.
41. Parra O, Sánchez-Armengol Á, Capote F, Bonnin M, Arboix A, Campos-Rodríguez F, et al. Efficacy of continuous positive airway pressure treatment on 5-year survival in patients with ischaemic stroke and obstructive sleep apnea: a randomized controlled trial. *J Sleep Res* 2015;24:47-53. DOI: 10.1111/jsr.12181.
42. Javaheri S, Martinez-Garcia MA, Campos-Rodriguez F, Muriel A, Peker Y. Continuous Positive Airway Pressure Adherence for Prevention of Major Adverse Cerebrovascular and Cardiovascular Events in Obstructive Sleep Apnea-Am J Respir Crit Care Med 2020;201:607-10. doi: 10.1164/rccm.201908-1593LE.
43. Boulos M, Dharmakulaseelan L, Brown D, Swartz R. Trials in Sleep Apnea and Stroke. Learning From the Past to Direct Future Approaches. *Stroke* 2021;51:366–72. doi: 10.1161/STROKEAHA.120.031709.
44. Alonso-Fernández A, García-Río F, Racionero MA, Pino JM, Ortuño F, Martínez I, et al. Cardiac rhythm disturbances and ST-segment

- depression episodes in patients with obstructive sleep apnea-hypopnea syndrome and its mechanisms. *Chest* 2005;127:15-22. doi: 10.1378/chest.127.1.15.
45. Monahan K, Storfer-Isser A, Mehra R, Shahar E, Mittleman M, Rottman J, et al. Triggering of nocturnal arrhythmias by sleep-disordered breathing events. *J Am Coll Cardiol* 2009;54:1797-804. doi: 10.1016/j.jacc.2009.06.038.
46. Bitter T, Fox H, Gaddam S, Horstkotte D, Oldenburg O. Sleep-disordered breathing and cardiac arrhythmias. *Can J Cardiol* 2015;31:928-34. doi: 10.1016/j.cjca.2015.04.022.
47. Mehra R, Benjamin EJ, Shahar E, Gottlieb DJ, Nawabit R, Kirchner HL, et al. Association of nocturnal arrhythmias with sleep-disordered breathing: The Sleep Heart Health Study. *Am J Respir Crit Care Med* 2006;173:910-16. doi: 10.1164/rccm.200509-1442OC.
48. Olmetti F, La Rovere MT, Robbi E, Taurino AE, Fanfulla F. Nocturnal cardiac arrhythmia in patients with obstructive sleep apnea. *Sleep Med* 2008;9:475-80. doi: 10.1016/j.sleep.2007.08.015.
49. Marinheiro R, Parreira L, Amador P, Mesquita D, Farinha J, Fonseca M, et al. Ventricular Arrhythmias in Patients with Obstructive Sleep Apnea. *Curr Cardiol Rev* 2019;15:64-74. doi: 10.2174/1573403X14666181012153252.
50. Gami AS, Pressman G, Caples SM, Kanagala R, Gard JJ, Davison DE, et al. Association of atrial fibrillation and obstructive sleep apnea. *Circulation* 2004;110:364-67. doi: 10.1161/01.CIR.0000136587.68725.8E.
51. Kwon Y, Koene RJ, Johnson A, Lin G-M, Ferguson J. Sleep, Sleep Apnea and Atrial Fibrillation: Questions and Answers. *Sleep Medicine Reviews* 2017;39:134-42. doi: 10.1016/j.smrv.2017.08.005.
52. Zhao E, Chen S, Du Y, Zhang Y. Association between Sleep Apnea Hypopnea Syndrome and the Risk of Atrial Fibrillation: A Meta-Analysis of Cohort Study. *Biomed Res Int* 2018;2018:5215868. doi: 10.1155/2018/5215868.
53. Kanagala R, Murali NS, Friedman PA, Ammash NM, Gersh BJ, Ballman KV, et al. Obstructive sleep apnea and the recurrence of atrial fibrillation. *Circulation* 2003;107:2589-94. doi: 10.1161/01.CIR.0000068337.25994.21.
54. Patel D, Mohanty P, Di Biase L, Shaheen M, Lewis WR, Quan K, et al. Safety and efficacy of pulmonary vein antral isolation in patients with obstructive sleep apnea: the impact of continuous positive

- airway pressure. *Circulation Arrhythmia and electrophysiology* 2010;3:445-51. doi: 10.1161/CIRCEP.109.858381.
55. Qureshi WT, Nasir UB, Alqalyoobi S, O'Neal WT, Mawri S, Sabbagh S, et al. Meta-Analysis of Continuous Positive Airway Pressure as a Therapy of Atrial Fibrillation in Obstructive Sleep Apnea. *The American journal of cardiology* 2015;116:1767-73. doi: 10.1016/j.amjcard.2015.08.046.
56. Shukla A, Aizer A, Holmes D, Fowler S, Park DS, Bernstein S, et al. Effect of Obstructive Sleep Apnea Treatment on Atrial Fibrillation Recurrence. A Meta-Analysis. *JACC: Clinical Electrophysiology* 2015;1:41-51. doi: 10.1016/j.jacep.2015.02.014.
57. Javaheri S, Barbe F, Campos-Rodríguez F, Dempsey JA, Khayat R, Javaheri S, et al. Sleep Apnea: Types, Mechanisms, and Clinical Cardiovascular Consequences. *J Am Coll Cardiol* 2017;69:841-58. doi: 10.1016/j.jacc.2016.11.069.
58. Loke YK, Brown JWL, Kwok CS, Niruban A, Myint PK. Association of Obstructive Sleep Apnea With Risk of Serious Cardiovascular Events. *Circ Cardiovasc Qual Outcomes* 2012;5:720-8. doi: 10.1161/CIRCOUTCOMES.111.964783.
59. Marín JM, Carrizo SJ, Vicente E, Agustí AG. Long-term cardiovascular outcomes obstructive sleep apnoea-hypopnoea with or without treatment with continuous positive pressure: an observational study. *Lancet* 2005;365:1046-53. doi: 10.1016/S0140-6736(05)71141-7.
60. Hla KM, Young T, Hagen EW, Stein JH, Finn LA, Nieto FJ, et al. Coronary heart disease incidence in sleep disordered breathing: the Wisconsin Sleep Cohort Study. *Sleep* 2015;38:677-84. doi: 10.5665/sleep.4654.
61. Gottlieb DJ, Yenokyan G, Newman AB, O'Connor GT, Punjabi NM, Quan SF, et al. Prospective study of obstructive sleep apnea and incident coronary heart disease and heart failure: the sleep heart health study. *Circulation* 2010;122:352-60. doi: 10.1161/CIRCULATIONAHA.109.901801.
62. Sánchez-de-la-Torre M, Sánchez-de-la-Torre A, Bertran S, Abad J, Duran-Cantolla J, Cabriada V, et al. Effect of obstructive sleep apnoea and its treatment with continuous positive airway pressure on the prevalence of cardiovascular events in patients with acute coronary syndrome (ISAACC study): a randomised controlled trial.

- Lancet Respir Med 2020;8:359-67. doi:10.1016/S2213-2600(19)30271-1.
63. Lee CH, Sethi R, Li R, Ho HH, Hein T, Jim MH, et al. Obstructive sleep apnea and cardiovascular events after percutaneous coronary intervention. *Circulation* 2016;133:2008-17. doi: 10.1161/CIRCULATIONAHA.115.019392.
  64. Qu H, Guo M, Zhang Y, Shi DZ. Obstructive sleep apnea increases the risk of cardiac events after percutaneous coronary intervention: a meta-analysis of prospective cohort studies. *Sleep Breath* 2018;22:33-40. doi: 10.1007/s11325-017-1503-8.
  65. Barbé F, Durán-Cantolla J, Sánchez-de-la-Torre M, Martínez-Alonso M, Carmona C, Barceló A, et al. Effect of continuous positive pressure on the incidence of hypertension and cardiovascular events in nonsleepy obstructive sleep apnea: a randomized controlled trial. *JAMA* 2012;307:2161-68. doi: 10.1001/jama.2012.4366.
  66. McEvoy RD, Antic NA, Heeley E, Luo Y, Ou Q, Zhang X, et al. CPAP for Prevention of Cardiovascular Events in Obstructive Sleep Apnea. *N Engl J Med* 2016;375:919-31. doi: 10.1056/NEJMoa1606599.
  67. Lavie L, Lavie P. The Double Edge Sword of Intermittent Hypoxia - Can intermittent hypoxia be both deleterious and protective in OSA? *J Appl Physiol* 2017: jap.00630.2017. doi: 10.1152/jap.00630.2017.
  68. Aguilar M, González-Candia A, Rodríguez J, Carrasco-Pozo C, Cañas D, García-Herrera C, et al. Mechanisms of Cardiovascular Protection Associated with Intermittent Hypobaric Hypoxia Exposure in a Rat Model: Role of Oxidative Stress. *Int J Mol Sci* 2018;19:366. doi: 10.3390/ijms19010288.
  69. Schulz R, Hummel C, Heinemann S, Seeger W, Grimminger F. Serum levels of vascular endothelial growth factor are elevated in patients with obstructive sleep apnea and severe nighttime hypoxia. *Am J Respir Crit Care Med*. 2002;165:67-70. doi: 10.1164/ajrccm.165.1.2101062.
  70. Berger S, Lavie L. Endothelial progenitor cells in cardiovascular disease and hypoxia—potential implications to obstructive sleep apnea. *Transl Res* 2011;158:1-13. doi: 10.1016/j.trsl.2010.12.008.
  71. Ben Ahmed H, Boussaid H, Longo S, Tlili R, Fazaa S, Baccar H, et al. Impact of obstructive sleep apnea in recruitment of coronary collaterality during inaugural acute myocardial infarction. *Ann Cardiol Angeiol (Paris)* 2015;64:273-8. doi: 10.1016/j.ancard.2015.01.014.

72. Sánchez-de-la-Torre A, Soler X, Barbe F, Flores M, Maisel A, Malhotra A, et al. Cardiac Troponin Values in Patients With Acute Coronary Syndrome and Sleep Apnea: A Pilot Study. *Chest* 2018;153:329-38. doi: 10.1016/j.chest.2017.06.046.
73. Ludka O, Stepanova R, Sert-Kuniyoshi F, Spinar J, Somers VK, Kara T. Differential likelihood of NSTEMI vs STEMI in patients with sleep apnea. *Int J Cardiol* 2017;248:64-8. doi: 10.1016/j.ijcard.2017.06.034.
74. Chou KT, Huang CC, Chen YM, Su KC, Shiao GM, Lee YC, et al. Sleep apnea and risk of deep vein thrombosis: A non-randomized, pair-matched cohort study. *Am J Med* 2012;125:374-80. doi: 10.1016/j.amjmed.2011.07.003.
75. Lin C-C, Keller JJ, Kang J-H, Hsu T-C, Lin H-C. Obstructive sleep apnea is associated with an increased risk of venous thromboembolism. *J Vasc Surg Venous Lymphat Disord* 2013;1:139-45. doi: 10.1016/j.jvsv.2012.08.001.
76. Alonso-Fernández A, de la Peña M, Romero D, Piérola J, Carrera M, Barceló A, et al. Association Between Obstructive Sleep Apnea and Pulmonary Embolism. *Mayo Clin Proc* 2013;88:579-87. doi: 10.1016/j.mayocp.2013.02.005.
77. Alonso-Fernández A, Suquia AG, de la Peña M, Casitas R, Pierola J, Barceló A, et al. OSA Is a Risk Factor for Recurrent VTE. *Chest* 2016;150:1291-301. doi: 10.1016/j.chest.2016.07.011.
78. Toledo-Pons N, Alonso-Fernández A, de la Peña M, Pierola J, Barceló A, Fernández-Capitán C, et al. Obstructive sleep apnea is associated to worse clinical-radiological risk scores of pulmonary embolism. *J Sleep Res* 2020; 29:e12871. doi: 10.1111/jsr.12871.
79. Phillips C, McEwen B, Morel-Kopp M-C, Yee B, Sullivan D, Ward C, et al. Effects of continuous positive airway pressure on coagulability in obstructive sleep apnoea: A randomised, placebo-controlled crossover study. *Thorax* 2012;67:639-44. doi: 10.1136/thoraxjnl-2011-200874.
80. Simonneau G, Gatzoulis MA, Adatia I, Celermajer D, Denton C, Ghofrani A, et al. Updated clinical classification of pulmonary hypertension. *J Am Coll Cardiol* 2013;62:D34-41. doi: 10.1016/j.jacc.2013.10.029.
81. Sanner BM, Doberauer C, Konermann M, Sturm A, Zidek. Pulmonary hypertension in patients with obstructive sleep apnea syndrome. *Arch Intern Med* 1997;157:2483-87. PubMed PMID: 9385300.

82. Sajkov D, McEvoy RD. Obstructive sleep apnea and pulmonary hypertension. *Prog Cardiovasc Dis* 2009;51:363-70. doi: 10.1016/j.pcad.2008.06.001.
83. Arias MA, García-Río FG, Alonso-Fernández A, Martínez I, Villamor J. Pulmonary hypertension in obstructive sleep apnoea: effects of continuous positive airway pressure: A randomized, controlled cross-over study. *European Heart Journal* 2006;27:106-13. doi: 10.1093/eurheartj/ehi807.
84. Lyons OD, Bradley TD. Heart Failure and Sleep Apnea. *Can J Cardiol* 2015;31:898-908. doi: 10.1016/j.cjca.2015.04.017.
85. Gottlieb DJ, Yenokyan G, Newman AB, O'Connor GT, Punjabi NM, Quan SF, et al. Prospective study of obstructive sleep apnea and incident coronary heart disease and heart failure: the sleep heart health study. *Circulation* 2010;122:352-60. doi: 10.1161/CIRCULATIONAHA.109.901801.
86. Hla KM, Young T, Hagen EW, Stein JH, Finn La, Nieto FJ, et al. Coronary heart disease incidence in sleep disordered breathing: the Wisconsin Sleep Cohort Study. *Sleep* 2015;38:677-84. doi: 10.5665/sleep.4654.
87. Wang H, Parker JD, Newton GE, Floras JS, Mak S, Chiu KL, et al. Influence of obstructive sleep apnea on mortality in patients with heart failure. *J Am Coll Cardiol* 2007;49:1625-31. doi: 10.1016/j.jacc.2006.12.046.
88. [Javaheri S](#), [Brown LK](#), [Abraham W](#), [Khayat R](#). Chest 2020;157:394-402. Apneas of Heart Failure and Phenotype-Guided Treatments: Part One: OSA. doi: 10.1016/j.chest.2019.02.407.
89. Kasai T, Narui K, Dohi T, Yanagisawa N, Ishiwata S, Ohno M, et al. Prognosis of patients with heart failure and obstructive sleep apnea treated with continuous positive airway pressure. *Chest* 2008;133:690-6. doi: 10.1378/chest.07-1901.
90. Bradley TD, Logan AG, Kimoff RJ, Sériès F, Morrison D, Ferguson K, et al. Continuous positive airway pressure for central sleep apnea and heart failure. *N Engl J Med* 2005;353:2025-33. doi: 10.1056/NEJMoa051001.
91. Cowie MR, Woehrle H, Wegscheider K, Angermann C, d'Ortho MP, Erdmann E, et al. Adaptive servo-ventilation for central sleep apnea in systolic heart failure. *N Engl J Med* 2015;373:1095-105. doi: 10.1056/NEJMoa1506459.



92. Anothaisintawee T, Reutrakul S, Van Cauter E, Thakkinstian A. Sleep disturbances compared to traditional risk factors for diabetes development: systematic review and meta-analysis. *Sleep Med Rev* 2016;30:11-24. doi: 10.1016/j.smrv.2015.10.002.
93. Barceló A, Barbé F, de la Peña M, Martínez P, Soriano JB, Piérola J, et al. Insulin resistance and daytime sleepiness in patients with sleep apnoea. *Thorax* 2008;63:946-50. doi: 10.1136/thx.2007.093740.
94. Martínez-Ceron E, Fernández-Navarro I, Garcia-Rio F. Effects of continuous positive airway pressure treatment on glucose metabolism in patients with obstructive sleep apnea. *Sleep Med Rev* 2016;25:121-30. doi: 10.1016/j.smrv.2015.03.002.
95. Xu PH, Hui CKM, Lui MMS, Lam DCL, Fong DYT, Ip MSM. Incident Type 2 Diabetes in OSA and Effect of CPAP Treatment: A Retrospective Clinic Cohort Study. *Chest* 2019;156:743-53. doi: 10.1016/j.chest.2019.04.130.
96. Shang W, Zhang Y, Wang G, Han D. Benefits of continuous positive airway pressure on glycaemic control and insulin resistance in patients with type 2 diabetes and obstructive sleep apnoea: A meta-analysis. *Diabetes Obes Metab* 2021;23:540-48. doi: 10.1111/dom.14247.
97. Martínez-Cerón E, Barquiel B, Bezos M, Casitas R, Galera R, García-Benito C, et al. Effect of Continuous Positive Airway Pressure on Glycemic Control in Patients with Obstructive Sleep Apnea and Type 2 Diabetes. A Randomized Clinical Trial. *Am J Respir Crit Care Med* 2016;194(4):476-85. doi: 10.1164/rccm.201510-1942OC.
98. Shaw JE, Punjabi NM, Naughton MT, Willes L, Bergenstal RM, Cistulli PA, et al. The Effect of treatment of obstructive sleep apnea on glycemic control in type 2 diabetes. *Am J Respir Crit Care Med* 2016;194:486-92. doi: 10.1164/rccm.201511-2260OC.
99. Loffler KA, Heeley E, Freed R, Meng R, Bittencourt LR, Gonzaga, Carvalho CC et al. Continuous Positive Airway Pressure Treatment, Glycemia, and Diabetes Risk in Obstructive Sleep Apnea and Comorbid Cardiovascular Disease. *Diabetes Care* 2020;43:1859-67. doi: 10.2337/dc19-2006.
100. Ford ES. Risks for all-cause mortality, cardiovascular disease, and diabetes associated with the metabolic syndrome: a summary of the evidence. *Diabetes Care* 2005;28:1769-78. doi: 10.2337/diacare.28.7.1769.

101. Coughlin SR, Mawdsley L, Mugarza JA, Calverley PM, Wilding JP. Obstructive sleep apnoea is independently associated with an increased prevalence of metabolic syndrome. *Eur Heart J* 2004;25:735-41. doi: 10.1016/j.ehj.2004.02.021.
102. Jullian-Desayes I, Joyeux-Faure M, Tamisier R, Launois S, Borel AL, Levy P, et al. Impact of obstructive sleep apnea treatment by continuous positive airway pressure on cardiometabolic biomarkers: a systematic review from sham CPAP randomized controlled trials. *Sleep Med Rev* 2015;21:23-38. doi: 10.1016/j.smr.2014.07.004.
103. Martínez-García MÁ, Campos-Rodríguez F, Barbé F. Cancer and OSA: current evidence from human studies. *Chest* 2016;150:451-63. doi: 10.1016/j.chest.2016.04.029.
104. Santamaría-Martos F, Benítez I, Giron C, Barbé F, Martínez-García MA, Hernández L, et al. Biomarkers of carcinogenesis and tumour growth in patients with cutaneous melanoma and obstructive sleep apnoea. *Eur Respir J* 2018;51(3). doi: 10.1183/13993003.01885-2017.
105. Gozal D, Farré R, Nieto FJ. Putative links between sleep apnea and cancer: from hypotheses to evolving evidence. *CHEST* 2015;148(5):1140-7. doi: 10.1378/chest.15-0634.
106. Nieto FJ, Peppard PE, Young T, Finn L, Hla KM, Farre R. Sleep-disordered breathing and cancer mortality: results from the Wisconsin Sleep Cohort Study. *Am J Respir Crit Care Med* 2012;186:190-4. doi: 10.1164/rccm.201201-0130OC
107. Campos-Rodríguez F, Martínez-García MA, Martínez M, Duran-Cantolla J, Peña M de la, Masdeu MJ, et al. Association between obstructive sleep apnea and cancer incidence in a large multicenter Spanish cohort. *Am J Respir Crit Care Med* 2013;187:99-105. doi: 10.1164/rccm.201209-1671OC.
108. Marshall NS, Wong K, Cullen S, Knuiman MW, Grunstein RR. Sleep apnea and 20-year follow-up for all-cause mortality, stroke, and cancer incidence and mortality in the Busselton Health Study Cohort. *J Clin Sleep Med* 2014;10 (4):355-62. doi: 10.5664/jcsm.3600.
109. Fang H, Miao N, Chen C, Sithole T, Chung M. Risk of cancer in patients with insomnia, parasomnia, and obstructive sleep apnea: a nationwide nested case-control study. *J Cancer* 2015;6(11):1140. doi: 10.7150/jca.12490.

110. Gozal D, Ham SA, Mokhlesi B. Sleep apnea and cancer: analysis of a nationwide population sample. *Sleep* 2016;39(8):1493-500. doi: 10.5665/sleep/6004.
111. Kendzerska T, Leung RS, Hawker G, Tomlinson G, Gershon AS. Obstructive sleep apnea and the prevalence and incidence of cancer. *CMAJ* 2014;186(13):985-92. doi: 10.1503/cmaj.140238.
112. Martínez-García MA, Campos-Rodríguez F, Nagore E, Martorell A, Rodríguez-Peralto JL, Riveiro-Falkenbach E, et al. Sleep-disordered breathing is independently associated with increased aggressiveness of cutaneous melanoma: a multicenter observational study in 443 patients. *Chest* 2018;154:1348-58. doi: 10.1016/j.chest.2018.07.015.
113. Seijo LM, Pérez-Warnisher MT, Giraldo-Cadavid LF, Oliveros H, Cabezas E, Troncoso MF, et al. Obstructive sleep apnea and nocturnal hypoxemia are associated with an increased risk of lung cancer. *Sleep Med* 2019;63:41-5. doi: 10.1016/j.sleep.2019.05.011.
114. Chen CY, Hu JM, Shen CJ, Chou YC, Tian YF, Chen YC, You SL, Hung CF, Lin TC, Hsiao CW, Lin CY, Sun CA. Increased incidence of colorectal cancer with obstructive sleep apnea: a nationwide population-based cohort study. *Sleep Med*. 2020;66:15-20. doi: 10.1016/j.sleep.2019.02.016. Epub 2019 Mar 7. PMID: 31785565.
115. Gavidia R, Dunietz GL, O'Brien L, Shannon C, Schuetz S, Spector M, Swiecicki P, Chervin RD. Obstructive sleep apnea in patients with head and neck cancer: a systematic review. *J Clin Sleep Med*. 2021 Feb 9. doi: 10.5664/jcsm.9134. Epub ahead of print. PMID: 33560207.
116. Lau EY, Eskes GA, Morrison DL, Rajda M, Spurr KF. Executive function in patients with obstructive sleep apnea treated with continuous positive airway pressure. *J Int Neuropsychol Soc* 2010;16(6):1077-88. doi: 10.1017/S1355617710000901.
117. Liguori C, Mercuri NB, Izzi F, Romigi A, Cordella A, Sancesario G, et al. Obstructive Sleep Apnea is Associated With Early but Possibly Modifiable Alzheimer's Disease Biomarkers Changes. *Sleep* 2017;40(5). doi: 10.1093/sleep/zsx011.
118. Wang G, Goebel JR, Li C, Hallman HG, Gilford TM, Li W. Therapeutic effects of CPAP on cognitive impairments associated with OSA. *J Neurol* 2019 May 20. doi: 10.1007/s00415-019-09381-2.
119. Daulatzai MA. Evidence of neurodegeneration in obstructive sleep apnea: Relationship between obstructive sleep apnea and cognitive dysfunction in the elderly. *J Neurosci Res* 2015;93:1778-94. doi: 10.1002/jnr.23634.

120. Baril AA, Carrier J, Lafrenière A, Warby S, Poirier J, Osorio RS, et al. Biomarkers of dementia in obstructive sleep apnea. *Sleep Med Rev* 2018;42:139-48. doi: 10.1016/j.smrv.2018.08.001.
121. Kerner NA, Roose SP. Obstructive Sleep Apnea is Linked to Depression and Cognitive Impairment: Evidence and Potential Mechanisms. *Am J Geriatr Psychiatry* 2016;24(6):496-508. doi: 0.1016/j.jagp.2016.01.134.
122. Andrade AG, Bubu OM, Varga AW, Osorio RS. The Relationship between Obstructive Sleep Apnea and Alzheimer's Disease. *J Alzheimers Dis* 2018;64(s1):S255-S270. doi: 10.3233/JAD-179936.
123. Emamian F, Khazaie H, Tahmasian M, Leschziner GD, Morrell MJ, Hsiung GY, et al. The Association Between Obstructive Sleep Apnea and Alzheimer's Disease: A Meta-Analysis Perspective. *Front. Aging Neurosci* 2016;8:78. doi: 10.3389/fnagi.2016.00078.
124. Bubu OM, Andrade AG, Umasabor-Bubu OQ, Hogan MM, Turner AD, de Leon MJ, Ogedegbe G, Ayappa I, Jean-Louis G G, Jackson ML, Varga AW, Osorio RS. Obstructive sleep apnea, cognition and Alzheimer's disease: A systematic review integrating three decades of multidisciplinary research. *Sleep Med Rev.* 2020 Apr;50:101250. doi: 10.1016/j.smrv.2019.101250. Epub 2019 Dec 12. PMID: 31881487; PMCID: PMC7593825.
125. Osorio RS, Gumb T, Pirraglia E, Varga AW, Lu SE, Lim J, et al. Sleep-disordered breathing advances cognitive decline in the elderly. *Neurology* 2015;84:1964-71. doi: 10.1212/WNL.0000000000001566.
126. Przybylska-Kuć S, Zakrzewski M, Dybała A, Kiciński P, Dzida G, Myśliński W, et al. Obstructive sleep apnea may increase the risk of Alzheimer's disease. *PLoS One* 2019;14(9):e0221255. doi: 10.1371/journal.pone.0221255.
127. Gosselin N, Baril AA, Osorio RS, Kaminska M, Carrier J. Obstructive Sleep Apnea and the Risk of Cognitive Decline in Older Adults. *Am J Respir Crit Care Med* 2019;199(2):142-8. doi: 10.1164/rccm.201801-0204PP.
128. Cordone S, Annarumma L, Rossini PM, De Gennaro L. Sleep and  $\beta$ -Amyloid Deposition in Alzheimer Disease: Insights on Mechanisms and Possible Innovative Treatments. *Front Pharmacol* 2019;10:695. doi: 10.3389/fphar.2019.00695.
129. Wang ML, Wang C, Tuo M, Yu Y, Wang L, Yu JT, Tan L, Chi S. Cognitive Effects of Treating Obstructive Sleep Apnea: A Meta-Analysis of Randomized Controlled Trials. *J Alzheimers Dis.* 2020;75(3):705-715. doi: 10.3233/JAD-200088. PMID: 32310179.

130. Davies CR, Harrington JJ. Impact of obstructive sleep apnea on neurocognitive function and impact of continuous positive air pressure. *Sleep Med Clin* 2016;11:287-98. doi: 10.1016/j.jsmc.2016.04.006.
131. Jorge C, Benítez I, Torres G, Dakterzada F, Minguez O, Huerto R, et al. The STOP-Bang and Berlin questionnaires to identify obstructive sleep apnoea in Alzheimer's disease patients. *Sleep Med* 2019;57:15-20. doi: 10.1016/j.sllep.2019.1.033.
132. Ju YS, Zangrilli MA, Finn MB, Fagan AM, Holtzman DM. Obstructive sleep apnea treatment, slow wave activity, and amyloid- $\beta$ . *Ann Neurol* 2019;85(2):291-5. doi: 10.1002/ana.25408.
133. Edwards C, Almeida OP, Ford AH. Obstructive sleep apnea and depression: A systematic review and meta-analysis. *Maturitas*. 2020 Dec;142:45-54. doi: 10.1016/j.maturitas.2020.06.002. Epub 2020 Jun 8. PMID: 33158487.
134. Chen YH, Keller JK, Kang JH, Hsieh HJ, Lin HC. Obstructive sleep apnea and the subsequent risk of depressive disorder: a population-based follow-up study. *J Clin Sleep Med* 2013;9(5):417-23. doi: 10.5664/jcsm.2652.
135. Peppard PE, Szklo-Coxe M, Hla KM, Young T. Longitudinal association of sleep-related breathing disorder and depression. *Arch Intern Med* 2006;166(16):1709-15.
136. Quintana-Gallego E, Carmona-Bernal C, Capote F, Sánchez-Armengol A, Botbol-Benhamou G, Polo-Padillo J, et al. Gender differences in obstructive sleep apnea syndrome: a clinical study of 1166 patients. *Respir Med* 2004;98(10):984-9. doi: 10.1016/j.rmed.2004.03.002.
137. Garbarino S, Bardwell WA, Guglielmi O, Chiorri C, Bonanni E, Magnavita N. Association of Anxiety and Depression in Obstructive Sleep Apnea Patients: A Systematic Review and Meta-Analysis. *Behav Sleep Med*. 2020 Jan-Feb;18(1):35-57. doi: 10.1080/15402002.2018.1545649. Epub 2018 Nov 19. PMID: 30453780.
138. Povitz M, Bolo CE, Heitman SJ, Tsai WH, Wang J, James MT. Effect of treatment of obstructive sleep apnea on depressive symptoms: systematic review and metaanalysis. *PLoS Med* 2014;11:e1001762. doi: 10.1371/journal.pmed.1001762.
139. Patil SP, Ayappa IA, Caples SM, Kimoff RJ, Patel SR, Harrod CG. Treatment of adult obstructive sleep apnea with positive airway pressure: an American academy of sleep medicine systematic

- review, meta-analysis, and GRADE assessment. *J Clin Sleep Med* 2019;15:301-34. DOI:10.5664/jcsm.7638.
140. Labarca G, Saavedra D, Dreyse J, Jorquera J, Barbe F. Efficacy of CPAP for Improvements in Sleepiness, Cognition, Mood, and Quality of Life in Elderly Patients With OSA: Systematic Review and Meta-analysis of Randomized Controlled Trials. *Chest*. 2020 Aug;158(2):751-764. doi: 10.1016/j.chest.2020.03.049. Epub 2020 Apr 11. PMID: 32289311.
141. Yang X, Yang J, Yang C, Niu L, Song F, Wang L. Continuous positive airway pressure can improve depression in patients with obstructive sleep apnoea syndrome: a meta-analysis based on randomized controlled trials. *J Int Med Res*. 2020 Mar;48(3):300060519895096. doi: 10.1177/0300060519895096. PMID: 32208858; PMCID: PMC7370809.
142. Campos-Rodríguez F, Queipo-Corona C, Carmona-Bernal C, Jurado-Gámez B, Cordero-Guevara J, Reyes-Núñez N, et al; Continuous positive airway pressure improves quality of life in women with obstructive sleep apnea. A randomized controlled trial. *Am J Respir Crit Care Med* 2016;194(10):1286-94. doi: 10.1164/rccm.201602-0265OC.
143. Campos-Rodríguez F, Asensio-Cruz MI, Cordero-Guevara J, Jurado-Gámez B, Carmona-Bernal C, González-Martínez M, et al. Effect of continuous positive airway pressure on inflammatory, antioxidant, and depression biomarkers in women with obstructive sleep apnea: a randomized controlled trial. *Sleep* 2019;42(10). doi: 10.1093/sleep/zsz145.
144. Martínez-García MA, Chiner E, Hernández L, Cortes JP, Catalán P, Ponce S, et al. Obstructive sleep apnoea in the elderly: role of continuous positive airway pressure treatment. *Eur Respir J* 2015;46(1):142-51. doi: 10.1183/09031936.00064214.
145. Ponce S, Pastor E, Orosa B, Oscullo G, Catalán P, Martínez A, et al. The role of CPAP treatment in elderly patients with moderate obstructive sleep apnoea: a multicentre randomized controlled trial. *Eur Respir J* 2019;54(2). doi: 10.1183/13993003.00518-2019.
146. Zheng D, Xu Y, You S, Hackett ML, Woodman RJ, Li Q, et al. Effects of continuous positive airway pressure on depression and anxiety symptoms in patients with obstructive sleep apnoea: results from the sleep apnoea cardiovascular Endpoint randomised trial and meta-analysis. *E Clinical Medicine* 2019;11:89-96. doi: 10.1007/s11605-017-3423-0.
147. Balcan B, Thunström E, Strollo PJ Jr, Peker Y. Continuous Positive Airway Pressure Treatment and Depression in Adults with Coronary Artery

Disease and Nonsleepy Obstructive Sleep Apnea. A Secondary Analysis of the RICCADSA Trial. *Ann Am Thorac Soc*. 2019 Jan;16(1):62-70. doi: 10.1513/AnnalsATS.201803-174OC. PMID: 30130421.
