# Supplementary material
Source: Elsevier journal article supplement (https://www.sciencedirect.com/science/article/pii/S0300289621004099)
Supplement: mmc7 [file S0300289621004099:mmc7.pdf]

## **2.4.B. Dispositivos de avance mandibular en el tratamiento de la Apnea Obstructiva del Sueño y del ronquido**

**Nicolás González Mangado** (editor). Jefe de Servicio de Neumología. Director de la Unidad Multidisciplinar de Sueño (UMS). Fundación Jiménez Díaz. Instituto Investigación Sanitaria FJD. Madrid. Centro de Investigación Biomédica en Red de Enfermedades Respiratorias (CIBERES), Madrid, España.

**Silvia González Pondal**. Servicio de Estomatología. Unidad Multidisciplinar del Sueño. Fundación Jiménez Díaz. Madrid.

**Gabriel Sampol Rubio**. Servicio de Neumología. Unidad Multidisciplinar del Sueño. Hospital Universitario Vall d'Hebron. Barcelona.

**Félix de Carlos Villafranca**. Servicio de Estomatología. Facultad de Medicina y Ciencias de la Salud. Universidad de Oviedo. Oviedo.

### **1. Tipos de dispositivos y funcionamiento**

Los dispositivos de avance mandibular (DAM) son dispositivos intraorales que se utilizan durante el sueño, permiten estabilizar y mantener la mandíbula adelantada, aumentando el área de la vía aérea superior (VAS). El paladar blando, la lengua y el hioides se adelantan activando la musculatura orofaríngea y evitando así su colapso. Existen numerosos modelos con diferentes diseños. La evidencia disponible recomienda el uso de dispositivos hechos a medida, bloques y titulables, adecuadamente validados<sup>1-5</sup>. Los que están hechos a medida han demostrado ser más eficaces (con respecto a los prefabricados) reduciendo el índice de apnea-hipopnea (IAH), así como una mayor preferencia y adherencia reportada por el paciente.

## **2. Indicaciones y factores predictivos de eficacia del tratamiento y metodología de inicio**

### **2.1. Indicaciones**

1. En pacientes con AOS de cualquier gravedad subsidiarios de tratamiento con presión positiva continua en la vía respiratoria (CPAP) por repercusión sintomática o comorbilidad cardiovascular en caso de no adaptación a este tratamiento. Esta indicación como alternativa a la CPAP es la principal del tratamiento con DAM. Este DIC considera que esta indicación debería estar disponible en las unidades de sueño de la sanidad pública.
2. En pacientes con AOS leve o moderada sin indicación de CPAP ni otra alternativa de tratamiento puede considerarse el tratamiento con DAM si existe sintomatología menor o ronquido que resulte molesto.

### **2.2. Factores predictivos de eficacia del tratamiento**

El paciente respondedor al tratamiento con DAM sigue siendo impredecible. Actualmente no existe un consenso sobre los factores que pronostican el resultado al tratamiento<sup>6</sup>. Ninguna característica permite descartar de forma fiable a un candidato a DAM, aunque a continuación se repasan algunos aspectos relevantes.

Desde el punto de vista clínico y polisomnográfico, la ausencia de obesidad, de hipertrofia de tejidos blandos faríngeos, los IAH bajos y la AOS posicional se relacionan con un mayor éxito del tratamiento con DAM, pero su valor predictivo es bajo<sup>3,6,7</sup>

Los datos cefalométricos permiten identificar factores presentes en pacientes respondedores como son: un ángulo del plano mandibular disminuido, una distancia del hioides al plano mandibular reducida, un paladar blando más corto, un espacio paraforíngeo mayor y un aumento de la anchura intercanina inferior. Sin embargo, tampoco han demostrado tener un valor predictivo a la respuesta de los DAM<sup>3,6</sup>.

Se ha propuesto la titulación del DAM durante un registro polisomnográfico con dispositivos que permiten distintos grados de avance mandibular mediante control remoto, detectando tanto a los pacientes respondedores como el grado de avance mandibular necesario. En una revisión sistemática de esta metodología se observó que tiene un elevado valor predictivo positivo<sup>2</sup>, sin embargo, no se encuentra estandarizada y no es habitual en las unidades de sueño.

Varios trabajos han utilizado la técnica de endoscopia de sueño inducido (DISE) con resultados prometedores. Concretamente, un aumento de la permeabilidad a nivel de la velofaringe y de la orofaringe durante la simulación de avance mandibular durante el estudio DISE se asocia a una mejor respuesta al tratamiento con DAM, aunque con un bajo valor predictivo negativo<sup>3,4</sup>. Por este motivo, junto con la relación coste-beneficio, este consenso recomienda no rechazar candidatos por los hallazgos del DISE y, consecuentemente, en espera de un mejor fenotipado de los pacientes que se benefician del tratamiento con DAM, no aconseja la práctica sistemática de DISE en los pacientes candidatos a DAM.

### **2.3. Metodología de inicio**

Tras la indicación de tratamiento con DAM el paciente debe ser valorado por un dentista certificado o experto en las alteraciones respiratorias del sueño que caracterizan la AOS, y que trabaje de forma coordinada con una unidad del sueño<sup>3,6,8</sup>. Es necesario realizar una exploración oral para excluir aquellos pacientes que no cumplan criterios de inclusión odontológicos: escaso número de dientes (mínimo entre 6-10 dientes/arcada), enfermedad periodontal severa o no controlada, reflejo nauseoso exacerbado, avance mandibular limitado y algunas formas de disfunción temporomandibular. Asimismo, debe plantearse una evaluación ORL y cirugía maxilofacial para detectar alteraciones anatómicas que aconsejen valorar alternativas quirúrgicas del tratamiento.

En la actualidad se recomienda que, tras la evaluación de la idoneidad del paciente desde el punto de vista de salud oral, el dentista experto proceda a prescribir y diseñar el dispositivo oral adecuado, valorando distintos grados de avance mandibular hasta conseguir el que resulte confortable para el paciente y que resuelva los síntomas clínicos. La poligrafía respiratoria podrá ser utilizada por un

dentista como herramienta de titulación. Tras seleccionar al paciente, ante la falta de factores pronósticos del éxito del tratamiento con DAM y de la metodología estandarizada para la graduación del avance eficaz, este consenso recomienda que la eficacia del DAM sea objetivada siempre mediante poligrafía o polisomnografía realizada en una unidad del sueño. En caso de no corrección de las alteraciones respiratorias serán necesarios nuevos estudios del sueño tras las modificaciones del DAM.

El momento de realizar este nuevo estudio del sueño vendrá definido cuando el dentista ha conseguido un grado de avance mandibular confortable para el paciente y que resuelva los síntomas clínicos.

### **3. Efectos secundarios y seguimiento**

#### **3.1. Efectos secundarios**

Los efectos adversos más frecuentes son: molestias musculares y dentales, cambios oclusales matutinos reversibles y alteraciones en la salivación. A nivel temporomandibular pueden aparecer molestias leves y transitorias. Todos estos problemas suelen ser leves y van disminuyendo entre el 1.<sup>er</sup> y 3.<sup>er</sup> mes tras su instauración<sup>3,6</sup>.

También se han documentado pequeños cambios oclusales permanentes en estudios a largo plazo. Se describen disminuciones de la sobremordida (1,0-1,2 mm) y resalte (1,06-1,7 mm)<sup>9</sup>. A largo plazo existen pequeños cambios estadísticamente significativos a nivel dental y esquelético: retroinclinación de los incisivos superiores, proinclinación de los incisivos inferiores y mesialización de los molares inferiores. Los cambios esqueléticos (aumento de la altura facial total) son secundarios a los cambios dentales. Existe una relación moderada entre el tiempo de uso de los dispositivos con el grado de cambio dental y esquelético<sup>9,10</sup>. Es necesario informar a los pacientes acerca de estos posibles cambios antes de comenzar con el tratamiento<sup>10,11</sup>.

#### **3.2. Seguimiento**

La utilización de dispositivos titulables permite adaptar el dispositivo basándonos en el control de los síntomas. La eficacia debe ser siempre objetivada mediante un estudio poligráfico/polisomnográfico de control<sup>3</sup>, pudiendo conducir sus resultados a posteriores ajustes.

Considerando que el tratamiento con DAM es crónico, se debe realizar un seguimiento para detectar posibles efectos secundarios, asegurar el cumplimiento, identificar la reaparición de la sintomatología con el posible aumento del IAH y la necesidad de reparación/cambio del dispositivo<sup>3,8,11</sup>. No disponemos de protocolos en cuanto a la periodicidad de este seguimiento; la mayoría de autores realizan controles cada 3, 6 y 12 y después anualmente<sup>8,11</sup>. Este seguimiento debe ser realizado por un dentista especializado en el manejo de este tipo de pacientes que trabaje de forma coordinada con una unidad del sueño. Asimismo, como con cualquier tratamiento crónico, sería conveniente establecer circuitos asistenciales con implicación de la medicina primaria.

No se recomienda la realización de PG/PSG durante el seguimiento si no hay empeoramiento de sintomatología, cambios significativos de peso o diagnóstico de comorbilidades asociadas al AOS<sup>3</sup>.

#### **4. Eficacia de los dispositivos de avance mandibular**

Desde el anterior Consenso Nacional del año 2005 se han ido acumulando evidencias que demuestran la eficacia del tratamiento con DAM. En la actualidad disponemos de numerosos ensayos controlados aleatorizados (ECA)<sup>1,3,5,12-22</sup> que permiten abordar los efectos del tratamiento con DAM sobre los distintos aspectos del AOS:

##### **1. IAH:**

Existe disparidad de criterios entre los distintos autores en la definición de éxito del tratamiento con DAM. Los más utilizados fueron una reducción del IAH > 50% respecto del basal, un IAH < 5/h o < 10/h. Asumiendo que los diferentes criterios son igualmente válidos, los resultados disponibles orientan hacia un porcentaje de éxitos del tratamiento con DAM en el 60% de los pacientes, aunque debe destacarse una notable variabilidad entre los distintos autores, reportándose tasas de éxito entre el 27% y el 100%. Estos resultados evidencian la necesidad de estandarizar la metodología del tratamiento y profundizar en los factores pronósticos de buena respuesta.

##### **2. Otras variables polisomnográficas:**

El uso de DAM se asocia a una mejora de la oximetría nocturna valorada mediante CT 90, SaO<sub>2</sub> media o SaO<sub>2</sub> mínima. No induce cambios en la eficiencia del sueño ni en el porcentaje del sueño REM, pero sí reduce la fragmentación del sueño valorada mediante el índice de microdespertares.

##### **3. Somnolencia:**

La práctica totalidad de los estudios evalúan el impacto sobre la somnolencia valorada mediante la escala de Epworth. Estos muestran una reducción de la misma mediante el tratamiento con DAM en pacientes con somnolencia significativa (Epworth > 10), aunque se describen diferencias interindividuales.

##### **4. Calidad de vida y aspectos cognitivos:**

La utilización de un DAM se asocia a una mejoría de la calidad de vida valorada mediante cuestionarios genéricos y específicos centrados en los trastornos del sueño. Aunque la mayoría de estudios reportan esta mejora durante seguimientos cortos, parece mantenerse en seguimientos a largo plazo (> 1 año). Al utilizarse la metodología “año de vida ajustado por calidad de vida” (AVAC) para la evaluación económica del tratamiento con DAM en AOS leves y moderadas, este mostró ser coste-efectivo<sup>3</sup>.

Los estudios que han valorado los efectos del tratamiento con DAM sobre aspectos cognitivos han presentado resultados discordantes. Unos reportan mejoras, especialmente en aspectos relacionados con la atención y el tiempo de reacción, mientras que otros no encuentran mejoras cognitivas.

### **5. Efectos sobre aspectos cardiovasculares:**

La mayoría de estudios que valoran el efecto del tratamiento con DAM sobre la presión arterial hallan una mejora en algún parámetro, habitualmente nocturno, del control tensional. Hay que destacar la observación reciente de que la mejora tensional sería más acusada en mujeres<sup>20</sup>. En la evaluación de otros aspectos cardiovasculares, los autores no encuentran mejoras ecocardiográficas con el uso de DAM y existen pocos datos, con resultados controvertidos, acerca de los efectos sobre marcadores de función endotelial, inflamación, estrés oxidativo o actividad del sistema nervioso autónomo.

### **6. Efecto sobre el ronquido:**

El uso de DAM se asocia habitualmente a una disminución en la frecuencia y/o intensidad del ronquido.

## **5. Cumplimiento, preferencias del paciente y abandono del tratamiento con DAM**

Se describe un cumplimiento autorreportado del tratamiento con DAM > 6 h/noche<sup>3</sup> en pacientes con AOS leve, moderada o grave. Recientemente, estudios que utilizan DAM dotados de un sensor térmico que contabiliza el uso objetivo del dispositivo<sup>16,17,22</sup> confirman este cumplimiento. Un estudio que comparó el cumplimiento objetivo a los 6 meses del tratamiento con DAM o CPAP no encontró diferencias entre ambos<sup>23</sup>. Los que han comparado ambos tratamientos utilizando el cumplimiento autorreportado del DAM tienen una duración máxima de 26 semanas<sup>3</sup>. Cuando se han valorado pacientes con IAH > 30 o con somnolencia, los cumplimientos presentados con ambos tratamientos tienden a ser similares. Estudios que valoran las preferencias del paciente destacan una preferencia algo superior hacia el tratamiento con DAM, aunque en el único estudio con pacientes con IAH medio > 30, 25 de 44 pacientes prefirieron el tratamiento con CPAP<sup>3</sup>. Cuando se comparan los DAM con el tratamiento postural no se encuentran diferencias en su cumplimiento<sup>16</sup>.

Los estudios aleatorizados en todo tipo de pacientes muestran una frecuencia de abandonos precoces del tratamiento con DAM en el 17% de los casos<sup>3</sup>. Los estudios que compararon la tasa de abandonos con la CPAP no mostraron diferencias entre ambos tratamientos. Datos recientes de cumplimiento a largo plazo apuntan que alrededor del 65% de los pacientes mantienen el tratamiento con DAM<sup>8,24,25</sup>. A falta de estudios comparativos a largo plazo de DAM y CPAP, esto apunta a un cumplimiento similar entre ambos tratamientos, aunque debe destacarse que los estudios con DAM recogen pacientes que previamente han rechazado CPAP<sup>8,24</sup>, a los que se abriría de esta manera una alternativa de tratamiento. De forma similar, algunos pacientes intolerantes a la colocación de un DAM son cumplidores del tratamiento con CPAP<sup>3</sup>.

## **6. Estudios comparativos de DAM frente a CPAP**

Disponemos de diversos ECA<sup>3,13,26</sup> que comparan el efecto del DAM y CPAP en los diferentes aspectos de la AOS moderada o grave. Algunos de ellos (IAH, fragmentación del sueño, SaO<sub>2</sub>) muestran mejorías mayores con la CPAP, mientras que en otros (somnolencia, calidad de vida, tensión arterial) no se encontraron diferencias entre ambos tratamientos. Estos hechos, junto con el relativamente escaso número de pacientes graves evaluados, la dificultad de predecir los pacientes con buena respuesta al DAM y la no disponibilidad de estudios comparativos en otras

facetas del AOS como la accidentabilidad, orientan a que en pacientes subsidiarios de tratamiento con CPAP se recomiende el tratamiento con un DAM solo en caso de no adaptación a la CPAP.

Se argumenta que la mayor eficacia de la CPAP vendría contrarrestada por una mejor aceptación del tratamiento con DAM, implicando un uso mayor en número de horas/noche y de noches/semana. Estudios observacionales han mostrado una buena aceptación del tratamiento con DAM en pacientes que han rechazado la CPAP. Sin embargo, como se expone previamente (apartado 5), esta preferencia no puede extrapolarse a los pacientes *de novo* tras el diagnóstico de la AOS ni al cumplimiento a largo plazo.

## BIBLIOGRAFÍA:

1. Johal A, Haria P, Manek S, Joury E, Riha R. Ready-Made Versus Custom-Made Mandibular Repositioning Devices in Sleep Apnea: A Randomized Clinical Trial. *J Clin Sleep Med* 2017;13:175-82. doi: 10.5664/jcsm.6440.
2. Kastoer C, Dieltjens M, Oorts E, Hamans E, Braem MJ, Van de Heyning PH, et al. The Use of Remotely Controlled Mandibular Positioner as a Predictive Screening Tool for Mandibular Advancement Device Therapy in Patients with Obstructive Sleep Apnea through Single-Night Progressive Titration of the Mandible: A Systematic Review. *J Clin Sleep Med* 2016;12(10):1411-21. doi: 10.5664/jcsm.7284.
3. Ramon MA, Sampol G, Anitua E, Cobo J, de Carlos F, González M, et al. Guía española de práctica clínica sobre la utilización de dispositivos de avance mandibular (DAM) en el tratamiento de pacientes adultos con síndrome de apneas-hipopneas del sueño. Guías de Práctica Clínica en el Sistema Nacional de Salud. 2017. Disponible en: <http://www.guiassalud.es>.
4. Huntley C, Cooper J, Stiles M, Grewal R, Boon M. Predicting Success of Oral Appliance Therapy in Treating Obstructive Sleep Apnea Using Drug-Induced Sleep Endoscopy. *J Clin Sleep Med* 2018;14(8):1333-7. doi: 10.5664/jcsm.7266.
5. Pepin JL, Raymond N, Lacaze O, Aisenberg N, Forcioli J, Bonte E, et al. Heat-moulded versus custom-made mandibular advancement devices for obstructive sleep apnoea: a randomised non-inferiority trial. *Thorax* 2019;74:667-74. doi: 10.1136/thoraxjnl-2018-212726.
6. Cunha TCA, Guimaraes TM, Schultz TCB, Almeida FR, Cunha TM, Simamoto PCJ, et al. Predictors of success for mandibular repositioning appliance in obstructive sleep apnea syndrome. *Braz Oral Res* 2017;31:e37. Doi: 10.1590/1807-3107BOR-2017.vol31.0037.
7. Chan H, Eckert DJ, van der Stelt PF, Guo J, Ge S, Ememi E et al. Phenotypes of responders to mandibular advancement device therapy in obstructive sleep apnea patients: A systematic review and metaanalysis. *Sleep Med Rev* 2020; 49:101229. doi: 10.1016/j.smrv.2019.101229
8. Attali V, Vecchierini MF, Collet JM, d'Ortho MP, Goutorbe F, Leger D, et al. Efficacy and tolerability of a custom-made Narval mandibular repositioning device for the treatment of obstructive sleep apnea: ORCADES study 2-year follow-up data. *Sleep Med* 2019 (en prensa). Disponible en: <https://doi.org/10.1016/j.sleep.2019.04.021>.
9. Patel S, Rinchuse D, Zullo T, Wadhwa R. Long-term dental and skeletal effects of mandibular advancement devices in adults with obstructive sleep apnoea: A systematic review. *Int Orthod* 2019;1:3-11. doi: 10.1016/j.ortho.2019.01.004.

10. Bartolucci ML, Bortolotti F, Martina S, Corazza G, Michelotti A, Alessandri-Bonetti G. Dental and skeletal long-term side effects of mandibular advancement devices in obstructive sleep apnea patients: a systematic review with meta-regression analysis. *Eur J Orthod* 2019;41(1):89-100. doi: 10.1093/ejo/cjy036.
11. Martins OFM, Chaves Junior CM, Rossi RRP, Cunali PA, Dal-Fabbro C, Bittencourt L. Side effects of mandibular advancement splints for the treatment of snoring and obstructive sleep apnea: a systematic review. *Dental Press J Orthod* 2018;23(4):45-54. doi: 10.1590/2177-6709.23.4.045-054.oar.
12. Edwards BA, Andara C, Landry S, Sands S, Joosten SA, Owens RL, et al. Upper-Airway Collapsibility and Loop Gain Predict the Response to Oral Appliance Therapy in Patients with Obstructive Sleep Apnea. *Am J Respir Crit Care Med* 2016;194:1413-22. doi: 10.1164/rccm.201601-0099OC.
13. Glos M, Penzel T, Schoebel C, Nitzsche GN, Zimmermann S, Rudolph C, et al. Comparison of effects of OSA treatment by MAD and by CPAP on cardiac autonomic function during daytime. *Sleep Breath* 2016;20:635-46. doi: 10.1007/s11325-015-1265-0.
14. Gupta S, Tripathi A, Trivedi C, Sharma P, Mishra A. A study to evaluate the effect of different mandibular horizontal and vertical jaw positions on sleep parameters in patients with obstructive sleep apnea. *Quintessence Int* 2016;47:661-6. doi: 10.3290/j.qi.a36383.
15. Norrhem N, Marklund M. An oral appliance with or without elastic bands to control mouth opening during sleep—a randomized pilot study. *Sleep Breath* 2016;20:929-38. doi: 10.1007/s11325-016-1312-5.
16. Benoist L, de Ruiter M, de Lange J, de Vries N. A randomized, controlled trial of positional therapy versus oral appliance therapy for position-dependent sleep apnea. *Sleep Med* 2017;34:109-17. doi: 10.1016/j.sleep.2017.01.024.
17. Gagnadoux F, Pépin JL, Vielle B, Bironneau V, Chouet-Girard F, Launois S, et al. Impact of mandibular advancement therapy on endothelial function in severe obstructive sleep apnea. *Am J Respir Crit Care Med* 2017;195(9):1244-52. doi: 10.1164/rccm.201609-1817OC.
18. Ishiyama H, Inukai S, Nishiyama A, Hideshima M, Nakamura S, Tamaoka M, et al. Effect of jaw-opening exercise on prevention of temporomandibular disorders pain associated with oral appliance therapy in obstructive sleep apnea patients: A randomized, double-blind, placebocontrolled trial. *J Prosthodontic Res* 2017;61:259-67. doi: 10.1016/j.jpor.2016.12.001.
19. La Mantia I, Grillo C, Narelli S, Andaloro C. Monoblock and twinblock mandibular advancement devices in the treatment of obstructive sleep apnea. *J Clin Anal Med* 2018;9:226-30. doi: 10.4328/JCAM.5659.
20. Rietz H, Franklin KA, Carlberg B, Sahlin C, Marklund M. Nocturnal Blood Pressure Is Reduced by a Mandibular Advancement Device for Sleep Apnea in Women: Findings From



Secondary Analyses of a Randomized Trial. *J Am Heart Assoc* 2018;7:1-10. doi: 10.1161/JAHA.118.008642.

21. Isacsson G, Nohlert E, Fransson AMC, Bornefalk-Hermansson A, Eriksson EW, Ortlieb E, et al. Use of bibloc and monobloc oral appliances in obstructive sleep apnoea: a multicentre, randomized, blinded, parallel-group equivalence trial. *Eur J Orthod* 2019;41(1):80-8. doi: 10.1093/ejo/cjy030.
22. Recoquillon S, Pépin JL, Vielle B, Andriantsitohaina R, Bironneau V, Chouet-Girard F, et al. Effect of mandibular advancement therapy on inflammatory and metabolic biomarkers in patients with severe obstructive sleep apnoea: a randomised controlled trial. *Thorax* 2019;74:496-99. doi: 10.1136/thoraxjnl-2018-212609.
23. Xu L, Xie D, Griffin KS, Wang Y, Nichols DA et al. Objective adherence to dental device versus positive airway pressure treatment in adults with obstructive sleep apnea. *J Sleep Res* 2020 Nov 30:e13240. doi: 10.1111/jsr.13240 (epub ahead of print)
24. Attali V, Chaumereuil Ch, Arnulf I, Golmard JL, Tordjman F, Morin L, et al. Predictors of long-term effectiveness to mandibular repositioning device treatment in obstructive sleep apnea patients after 1000 days. *Sleep Med* 2016;27-28:107-14. Disponible en: <http://dx.doi.org/10.1016/j.sleep.2016.10.004>.
25. de Ruiter MHT, Benoist LB, de Vries N, de Lange J. Durability of treatment effects of the Sleep Position Trainer versus oral appliance therapy in positional OSA: 12-month follow-up of a randomized controlled trial. *Sleep Breath* 2018;22:441-50. doi: 10.1007/s11325-017-1580-8.
26. Trzepizur W, Cistulli PA, Glos M, Vielle B, Sutherland K, Wijkstra PJ et al. *Sleep*. 2021 Jan 25:zsab015. doi: 10.1093/sleep/zsab015. Online ahead of print.
