# Supplementary material
Source: Elsevier journal article supplement (https://www.sciencedirect.com/science/article/pii/S0300289621004099)
Supplement: mmc9 [file S0300289621004099:mmc9.pdf]

## 2.4.D. Tratamientos alternativos de la Apnea Obstructiva del Sueño, manejo personalizado según fenotipos fisiopatogénicos: terapia posicional, tratamiento farmacológico, terapia miofuncional, BiPAP, EPAP nasal y terapia de presión oral

**Nicolás González Mangado** (editor). Jefe de Servicio de Neumología. Director de la Unidad Multidisciplinar de Sueño (UMS). Fundación Jiménez Díaz. Instituto de Investigación Sanitaria FJD. Madrid. Centro de Investigación Biomédica en Red de Enfermedades Respiratorias (CIBERES), Madrid, España.

**Carmen Carmona Bernal.**Facultativo especialista de área de Neumología.

Unidad de Trastornos Respiratorios del Sueño. Unidad Médico-Quirúrgica de Enfermedades Respiratorias. Hospital Universitario Virgen del Rocío. Sevilla.

**Candelaria Caballero Eraso.** Facultativo especialista de área de Neumología.

Unidad de Trastornos Respiratorios del Sueño. Unidad Médico-Quirúrgica de Enfermedades Respiratorias. Hospital Universitario Virgen del Rocío. Sevilla.

La apnea obstructiva del sueño (AOS) es una enfermedad heterogénea, tanto en su fisiopatología, en su expresión polisomnográfica como en la presentación clínica de la enfermedad. A pesar de ello, hoy en día se sigue utilizando un único parámetro (el índice de apnea-hipopnea [IAH]) para determinar el diagnóstico, la severidad y la indicación y respuesta al tratamiento. Además, la mayoría de las veces presenta un origen multifactorial, aunque de forma clásica el tratamiento no siempre se ha orientado desde este punto de vista. En los últimos años se han descrito diversos fenotipos de AOS (en base a rasgos anatómicos como el estrechamiento de la vía aérea superior (VAS) y no anatómicos, descritos en profundidad en otro apartado de este documento de consenso), los cuales han ayudado a mejorar el conocimiento de los mecanismos implicados en la enfermedad, permitiéndonos desarrollar diferentes estrategias terapéuticas para llevar a cabo una medicina personalizada de dicha patología. Por lo tanto, el tratamiento de la AOS no es único ni simple, y debe atender a su heterogeneidad y origen multifactorial y llevarse a cabo de manera individualizada. No existe un único tratamiento ideal que abarque cualquier tipo de paciente y el mejor conocimiento de la fisiopatología de la AOS llevará a importantes avances en su control<sup>1</sup> (Tabla 1).

**Tabla 1.** AOS: apnea obstructiva del sueño; BiPAP: presión positiva binivel; CPAP: presión positiva continua en las vías respiratorias; DAM: dispositivos de avance mandibular; EPAP: presión nasal espiratoria positiva en las vías respiratorias; IAH: índice de apnea-hipopnea.

| TRATAMIENTO                                    | EVIDENCIAS                                                                                                                                                                  | INDICACIONES                                                                                                                                                                              |
|------------------------------------------------|-----------------------------------------------------------------------------------------------------------------------------------------------------------------------------|-------------------------------------------------------------------------------------------------------------------------------------------------------------------------------------------|
| <b>Terapia posicional</b><br>(Omobomi O, 2018) | Reducción significativa del IAH en algunos casos < 5 episodios/h, pero en muestras muy reducidas y con resultados inconsistentes sobre somnolencia diurna y calidad de vida | - Como tratamiento único en pacientes con episodios respiratorios exclusivamente en supino o con un IAH < 15/h en otras posiciones, siempre con confirmación del control de la enfermedad |

|                                                                  |                                                                                                                                                                                                                                                                                                                                                                                             |                                                                                                                                                                                                                                                                                                                                                                                                                                           |
|------------------------------------------------------------------|---------------------------------------------------------------------------------------------------------------------------------------------------------------------------------------------------------------------------------------------------------------------------------------------------------------------------------------------------------------------------------------------|-------------------------------------------------------------------------------------------------------------------------------------------------------------------------------------------------------------------------------------------------------------------------------------------------------------------------------------------------------------------------------------------------------------------------------------------|
|                                                                  |                                                                                                                                                                                                                                                                                                                                                                                             | <ul style="list-style-type: none"> <li>- Como terapia adyuvante que permita disminuir la presión del tratamiento con CPAP en pacientes con predominio de episodios en supino</li> <li>- En aquellos pacientes con predominio de episodios en supino que rechace terapias de primera línea</li> </ul>                                                                                                                                      |
| <b>Tratamiento farmacológico</b><br>(Taranto-Montemurro L, 2019) | <p>En 20 pacientes con AOS, la terapia combinada de atomoxetina (inhibidor de la recaptación de norepinefrina) y oxibutinina (bloqueante muscarínico) en dosis única redujo el IAH (63%; de 28,5 a 7,5 episodios/h) y mejoró la saturación mínima al incrementar la respuesta del músculo geniogloso durante el sueño</p> <p>Se necesita conocer su efecto a largo plazo y su seguridad</p> | <ul style="list-style-type: none"> <li>- Aunque en el futuro la terapia farmacológica podría ser útil en algún fenotipo de pacientes, este DIC considera que actualmente es prematuro utilizar esta combinación o cualquier otro fármaco para el tratamiento de la AOS</li> </ul>                                                                                                                                                         |
| <b>Terapia miofuncional</b><br>(de Felício CM, 2018)             | <p>Estudios aleatorizados en pacientes con AOS han demostrado que puede disminuir el IAH (50%; de 24,5 a 12,3 episodios/h), mejorar la saturación mínima, la somnolencia diurna y calidad de vida</p>                                                                                                                                                                                       | <ul style="list-style-type: none"> <li>- Alternativa terapéutica en pacientes no obesos con AOS leve-moderada</li> <li>- Tratamiento concomitante para mejorar la eficacia y tolerancia de la CPAP, reduciendo la presión requerida</li> <li>- Tratamiento complementario en los pacientes con DAM</li> </ul>                                                                                                                             |
| <b>BiPAP</b><br>(Patil SP, 2019)                                 | <p>La BiPAP no ha mostrado una eficacia superior a la CPAP en cuanto a la reducción del IAH, respuesta de la somnolencia, calidad de vida, efectos secundarios ni mejora de la adherencia al tratamiento, excepto en los pacientes con dificultades para cumplir con el tratamiento con CPAP</p>                                                                                            | <ul style="list-style-type: none"> <li>- Pacientes que no han sido capaces de tolerar la CPAP por requerir presiones muy elevadas</li> <li>- Plantear cambiar a BiPAP en pacientes que requieran presiones de CPAP &gt; 15 para el control de los episodios respiratorios, y siempre que se requieran presiones de CPAP &gt; 20</li> <li>- Pacientes que presentan una patología concomitante que indica tratamiento con BiPAP</li> </ul> |
| <b>EPAP nasal</b><br>(Riaz M, 2015)                              | <p>En una revisión sistemática se demostró una reducción relativa media del IAH de un 53%, aunque no hay predictores de quién se podría beneficiar de esta terapia</p>                                                                                                                                                                                                                      | <p>Ante la falta de predictores de respuesta y la falta de estudios más amplios, tan solo podría ser una alternativa en pacientes seleccionados con AOS leve-moderada</p>                                                                                                                                                                                                                                                                 |

|                                                      |                                                                                                                                                                         |                                                                                                                     |
|------------------------------------------------------|-------------------------------------------------------------------------------------------------------------------------------------------------------------------------|---------------------------------------------------------------------------------------------------------------------|
| <b>Terapia de presión oral</b><br>(Colrain IM, 2013) | En un estudio multicéntrico realizado con 63 pacientes, el 32% de los casos mostró un IAH < 10 en la primera noche, con una reducción del 50% respecto al valor inicial | Actualmente no existe evidencia suficiente para recomendar su uso como tratamiento alternativo en pacientes con AOS |
|------------------------------------------------------|-------------------------------------------------------------------------------------------------------------------------------------------------------------------------|---------------------------------------------------------------------------------------------------------------------|

## Terapia posicional

En más del 50% de los pacientes diagnosticado de AOS la frecuencia de episodios respiratorios se ve influenciada por la posición adoptada durante el sueño, definiéndose la AOS posicional (AOSP) como el incremento del IAH en decúbito supino de al menos el doble del IAH en decúbito no-supino<sup>2</sup>, sin que exista unanimidad en la definición precisa. La definición de AOSP adoptada por este documento de consenso se basa clasificación de Cartwright, en la que se excluye a pacientes que están menos de un 20% del tiempo de sueño en cada una de las posiciones (supino y no supino), y se consideran dos grupos:

- AOS supino aislado: IAH en no supino inferior a 5/h.
- AOS predominantemente en supino: IAH en no supino superior a 5/h.

El objetivo de la terapia posicional (TP) es evitar que el paciente duerma en esta posición, con el fin de disminuir el número de episodios respiratorios durante la noche. De forma clásica, se ha utilizado desde una pelota de tenis en la espalda de una camiseta a dispositivos diseñados específicamente para ello. En la actualidad existen tres dispositivos aprobados por la Food and Drug Administration (FDA) para el tratamiento de la AOSP, entre los que encontramos un dispositivo semirrígido en forma de cuña unido a un cinturón elástico y usado alrededor del torso superior (Zzoma Positional Sleeper, Sleep Specialists, LLC, Abington, PA) (**Figura 1**), un dispositivo que colocado en el cuello vibra al dormir boca arriba (Night Shift Sleep Positioner, Advanced Brain Monitoring, Carlsbad, CA) (**Figura 2**) y una almohada triangular de doble inclinación que favorece el decúbito lateral<sup>3</sup>. En términos generales, la validación de estos dispositivos demuestra una reducción significativa del IAH, en algunos de ellos por debajo de 5 episodios/h, pero las muestras de estudio fueron muy reducidas, con escaso seguimiento y los resultados sobre somnolencia diurna y calidad de vida inconsistentes. El principal inconveniente de esta terapia es la incomodidad que limita la tolerancia.

**Figura 1.** Zzoma Positional Sleeper. (Con autorización de Sleep Specialists, LLC. Kendall Park, NJ 08824, EE.UU.)

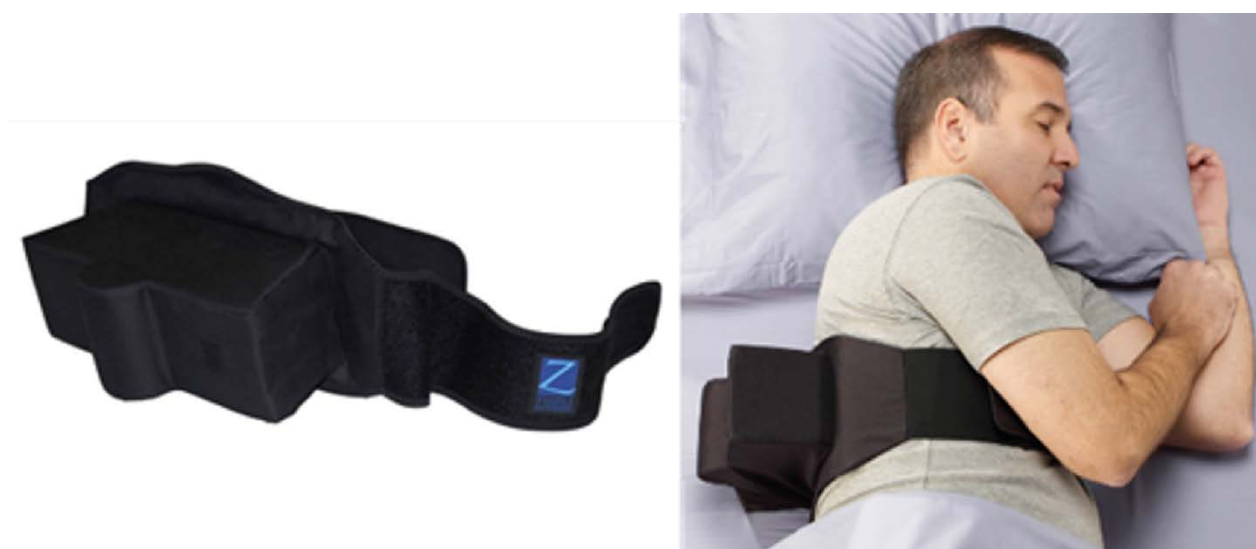

**Figura 2.** Night Shift Sleep Positioner. (Con autorización de Advanced Brain Monitoring. Carlsbad, CA 92008, EE.UU.)

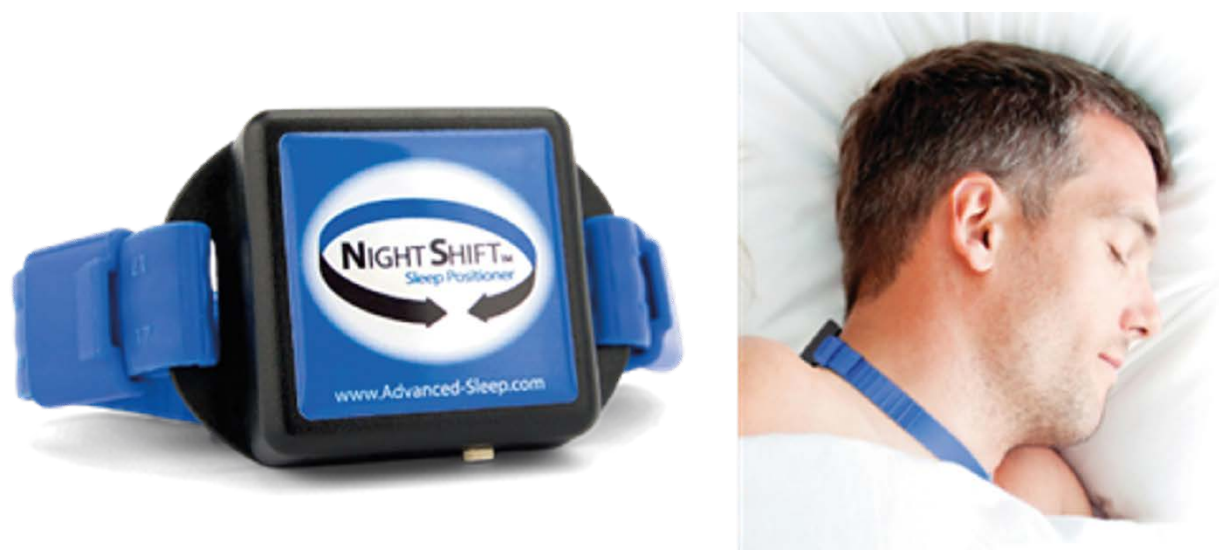

Este DIC recomienda el uso de la TP en las siguientes situaciones:

- Como tratamiento único en el caso de pacientes con episodios respiratorios únicamente en posición de supino o con un IAH  $< 15/h$  en otras posiciones, con confirmación del control de la enfermedad.
- Como terapia adyuvante que permita disminuir la presión del tratamiento con presión positiva continua en las vías respiratorias (CPAP) en pacientes con predominio de episodios en supino.

- En aquellos pacientes con predominio de episodios en supino que rechazan las terapias de primera línea de tratamiento.

A pesar de la eficacia de la terapia posicional en la reducción del IAH y su coste-efectividad, al menos a corto plazo, su uso es escaso. Posiblemente una de las principales limitaciones de esta terapia en la práctica clínica habitual es la ausencia de control del cumplimiento, control de episodios residuales y eficacia a lo largo del tiempo, lo que ha condicionado su uso como alternativa terapéutica.

Son necesarios estudios en muestras mayores y, para obtener mejores beneficios, serían útiles herramientas fiables que nos permitan evaluar la cumplimentación de la terapia posicional y su efectividad a largo plazo. El *Spanish Sleep Network* está trabajando en un sistema de vibración para el tratamiento de la AOSP con resultados preliminares alentadores (**Figura 3**)<sup>4</sup>.

**Figura 3.** Somnibel. (Con autorización de SIBEL,S.A.U – SIBELMED. Rosselló, 500 08026 Barcelona.)

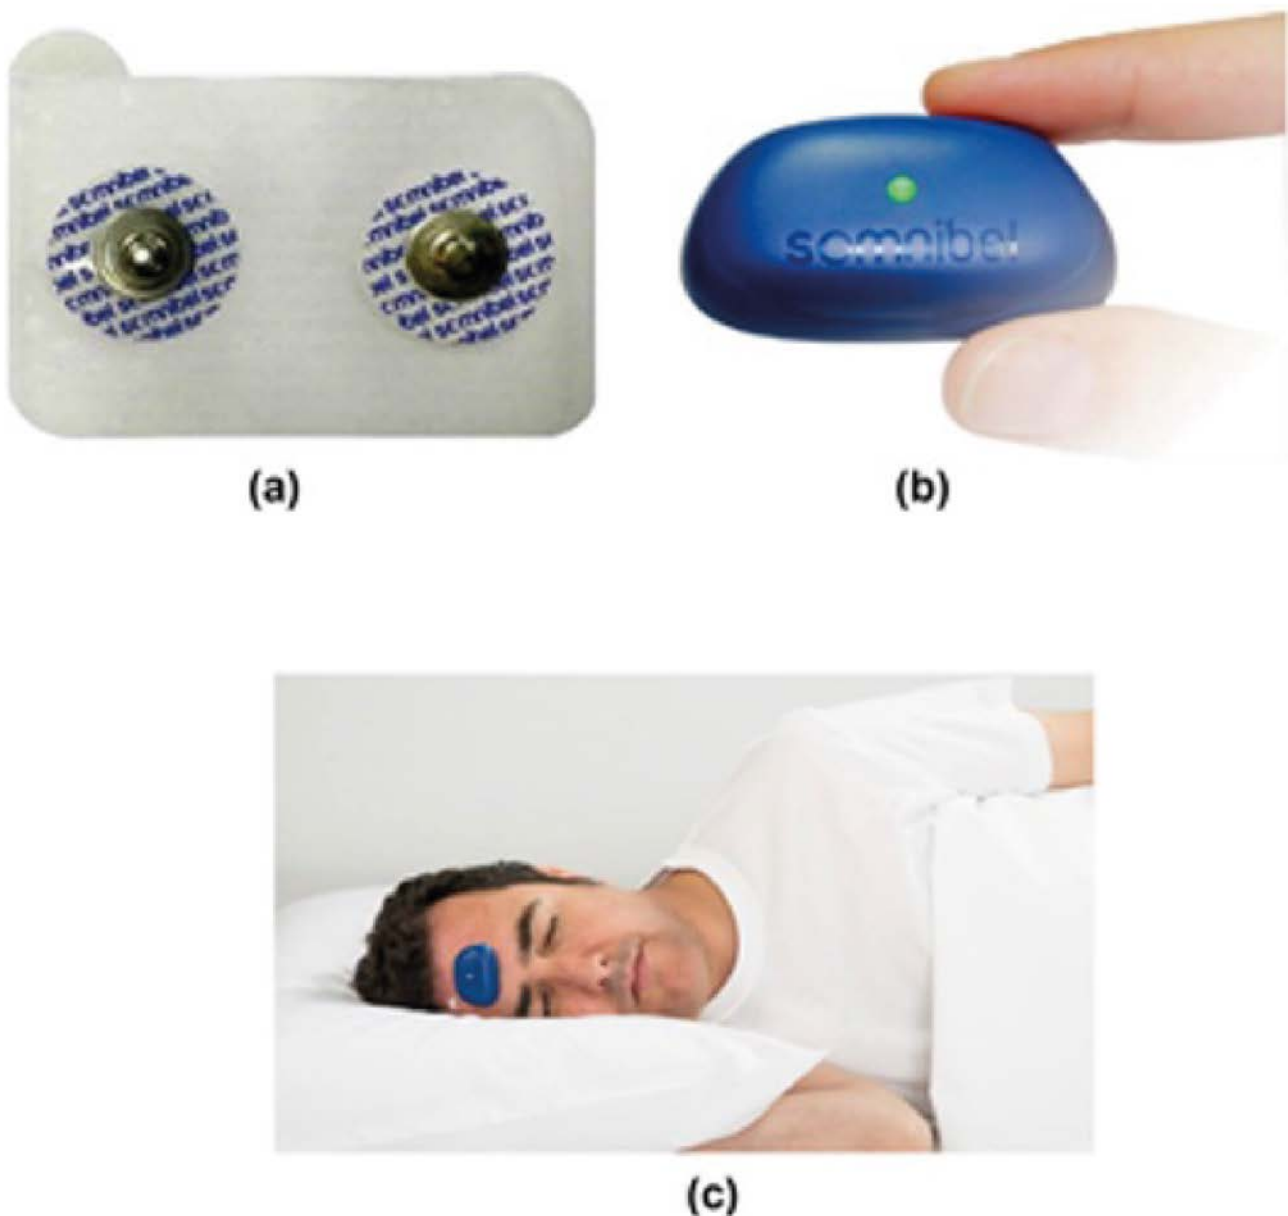

## Tratamiento farmacológico

La variedad fenotípica de la AOS y la complejidad de la fisiopatología de dicha enfermedad ha hecho que el desarrollo de un fármaco para tratar al paciente con AOS sea compleja. En los últimos años se han estudiado el uso de diferentes moléculas para el tratamiento de la AOS. El uso de dichas moléculas (de manera individual o combinadas) están dirigidas a: 1) incrementar el reclutamiento muscular, principalmente mejorando la función de la musculatura de la VAS (como la combinación de los inhibidores de la recaptación de norepinefrina y bloqueadores muscarínicos); 2) incidir sobre el *drive* ventilatorio o *loop gain*, actuando sobre el control del centro respiratorio (inhibidores de la anhidrasa carbónica o antagonistas del receptor de opioides) y 3, actuando sobre los *arousal* (hipnóticos como la zopiclona o parasimpaticomiméticos como donezepilo). Sin embargo, un metaanálisis publicado recientemente cuyo objetivo era resumir la evidencia sobre la eficacia de la farmacoterapia en adultos con AOS y delinear los mecanismos subyacentes concluyó que, aunque algunos ensayos indican resultados favorables, hasta esa fecha no se disponía de ensayos de fase III ni pruebas suficientes para recomendar cualquier farmacoterapia para tratar la AOS<sup>5</sup>. Desde esa fecha hasta la actualidad se ha publicado por primera vez cómo una terapia combinada (atomoxetina -un inhibidor de la recaptación de norepinefrina- y oxibutinina -bloqueante muscarínico) (**Figura 4**) en dosis única redujo de forma significativa el IAH (mediana 63%; de 28,5 a 7,5 episodios/h) y mejoró la saturación mínima en 20 pacientes con AOS al incrementar la respuesta del músculo geniogloso durante el sueño<sup>6</sup>. Estos resultados abren una apasionante línea de investigación, pero el efecto sostenible a largo plazo de estos medicamentos debe ser demostrado, así como la respuesta clínica, la dosis requerida, los efectos secundarios y los grupos de pacientes en los que el medicamento puede ser eficaz.

En el futuro, la terapia farmacológica podría ser útil para un fenotipo determinado de pacientes y/o en combinación con otros tratamientos. No obstante, este DIC considera que a día de hoy es prematuro utilizar esta combinación o cualquier otro fármaco como una opción de tratamiento para la AOS.

**Figura 4.** Efecto de atomoxetina y oxubutinina sobre el nervio hipogloso y en la respuesta del músculo geniogloso. Modificado de Drug pair shows promise for treating sleep apnea. Science 2018;361(6408):1174-5. doi: 10.1126/science.361.6408.1174. PMID: 30237332. Reproducción con autorización de AAAS.

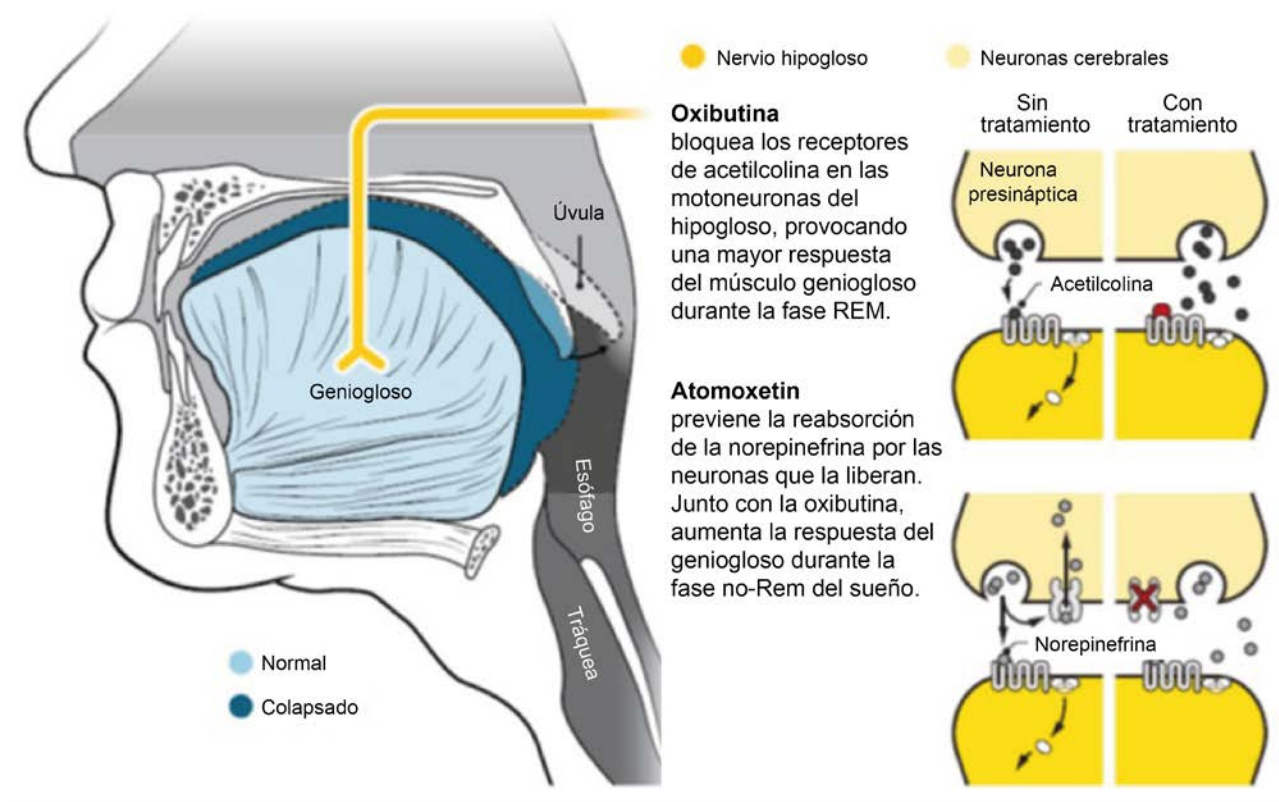

## Terapia miofuncional

Los músculos dilatadores de la VAS desempeñan un papel fundamental para mantener abierta la vía aérea durante el sueño, por lo que se postula que ejercicios sobre dicha musculatura podrían ser una alternativa terapéutica en los pacientes con AOS. La terapia miofuncional se compone de ejercicios isotónicos e isométricos de estructuras orales (labios y lengua) y orofaríngeos (paladar blando, pared lateral de la faringe) y ha resultado efectiva en el tratamiento del ronquido, sobre todo en el caso del ronquido primario no tributario a cirugía o dispositivos intraorales; además, estudios randomizados en pacientes con AOS han demostrado que puede disminuir el IAH hasta un 50% ( $24,5 \pm 14,3/h$  a  $12,3 \pm 11,8/h$ ), mejorar la saturación mínima, la somnolencia diurna y calidad de vida, por lo que en casos seleccionados podría ser un complemento a otros tratamientos de la AOS<sup>7</sup>. Una de las principales limitaciones de esta práctica terapéutica es que requiere de un cumplimiento estricto por parte del paciente de las tablas de ejercicios a realizar cada día. Sin embargo, los estudios randomizados de alta calidad son aún escasos, y la respuesta al tratamiento y efectos en la musculatura deben analizarse a largo plazo.

Este DIC considera la terapia miofuncional una alternativa terapéutica en pacientes con AOS leve-moderada no obesos o como un tratamiento concomitante para mejorar la eficacia y tolerancia de la CPAP, reduciendo la presión requerida o como tratamiento complementario en los pacientes con dispositivos de avance mandibular.

## Presión positiva binivel (BiPAP)

La BiPAP proporciona una presión inspiratoria mayor que la presión espiratoria y se considera un dispositivo de soporte ventilatorio, por lo que no debe ser usada de forma rutinaria como tratamiento del paciente con AOS. La BiPAP no ha mostrado una eficacia superior a la CPAP en cuanto a la

reducción del IAH, respuesta de la somnolencia, calidad de vida, efectos secundarios ni mejora en la adherencia al tratamiento, excepto en aquellos pacientes con dificultades para cumplir con el tratamiento con CPAP. Por tanto, no existen beneficios para el uso de BiPAP frente a CPAP en el paciente con AOS. No obstante, la BiPAP puede ser una alternativa en pacientes que requieran presiones muy altas de CPAP para mejorar la tolerancia al tratamiento al disminuir la presión durante la espiración. La BiPAP estaría indicada en el tratamiento de otros trastornos respiratorios relacionados con el sueño asociados a hipercapnia, para lo que se remite al apartado correspondiente de este mismo documento de consenso<sup>8</sup>.

Este DIC recomienda el uso de la BiPAP en el tratamiento del paciente con AOS en:

- Aquellos pacientes que no han sido capaces de tolerar la CPAP por requerir presiones muy elevadas.
- Plantear cambiar a BiPAP en pacientes que requieran presiones de CPAP superiores a 15 para el control de los episodios respiratorios, y siempre que se requieran presiones de CPAP superiores a 20.
- Pacientes que presentan una patología concomitante que indica tratamiento con BiPAP.

### **Presión nasal espiratoria positiva en las vías respiratorias (EPAP)**

Son válvulas de resistencia unidireccional que se colocan con una cinta adhesiva sobre las fosas nasales, con una resistencia alta durante la espiración y muy baja durante la inspiración. Con ello se consigue una presión positiva durante la espiración que dilata la VAS y la hace más resistente al colapso durante la siguiente inspiración<sup>9</sup>. En una revisión sistemática de 345 pacientes evaluados se encontró una reducción relativa media del 53% en el IAH, aunque no hay predictores de quién se podría beneficiar de esta terapia<sup>10</sup>.

Las limitaciones de la EPAP nasal son las siguientes: son frecuentes los episodios residuales, no hay claros predictores de quién se podría beneficiar de la EPAP nasal, es difícil evaluar la adherencia largo plazo y el alto coste, al ser diseñados para su uso para una única noche.

Este DIC considera que ante la falta de predictores de quien se podría beneficiar de la EPAP nasal, y a falta de estudios más amplios, tan solo podría ser una alternativa en pacientes seleccionados con AOS leve-moderado.

### **Terapia de presión oral**

Se trata de una boquilla que se coloca en el interior de la cavidad oral y que se conecta a través de un tubo a un dispositivo capaz de generar presión negativa (50 cm H<sub>2</sub>O). Al aplicar la presión negativa, la úvula y el paladar blando se desplazan hacia delante hacia la base de la lengua, con aumento de la vía aérea. En un estudio multicéntrico realizado con 63 pacientes, el 32% de los casos mostró un IAH < 10 en la primera noche, con una reducción del 50% respecto al valor inicial<sup>11</sup>.

Entre las limitaciones de la terapia de presión oral se encuentran: que se trata de un dispositivo que no es muy diferente de la CPAP y que no está establecida la aceptación/adherencia a largo plazo.

En el momento actual no existe evidencia suficiente para que este DIC recomiende el uso de la terapia de presión oral como tratamiento alternativo en pacientes con AOS.

## BIBLIOGRAFÍA:

1. Zinchuk AV, Gentry MJ, Concato J, Yaggi HK. Phenotypes in obstructive sleep apnea: A definition, examples and evolution of approaches. *Sleep Med Rev* 2017;35:113-23. doi: 10.1016/j.smrv.2016.10.002.
2. Cartwright RD. Effect of sleep position on sleep apnea severity. *Sleep* 1984;7:110-14. doi: 10.1093/sleep/7.2.110.
3. Omobomi O, Stuart F. Quan. Positional therapy in the management of positional obstructive sleep apnea. A review of the current literature. *Sleep Breath* 2018;22:297-304. doi: 10.1007/s11325-017-1561-y.
4. Hidalgo Armas L, Turino C, Cordero-Guevara J, Manjón JL, Durán-Carro J, Barbé F, et al; Spanish Sleep Network. A new postural device for the treatment of positional obstructive sleep apnea. A pilot study. *Respir Med* 2019;151:111-7. doi: 10.1016/j.rmed.2019.02.005.
5. Gaisl T, Haile SR, Thiel S, Osswald M, Kohler M. Efficacy of pharmacotherapy for OSA in adults: A systematic review and network meta-analysis. *Sleep Medicine Reviews* 2019;46:74-86. doi: 10.1016/j.smrv.2019.04.009.
6. Taranto-Montemurro L, Messineo L, Sands SA, Azarbarzin A, Marques M, Edwards BA, et al. The Combination of Atomoxetine and Oxybutynin Greatly Reduces Obstructive Sleep Apnea Severity: A Randomized, Placebo-Controlled, Double-Blind Crossover Trial. *Am J Respir Crit Care Med* 2019;199(10):1267-76. doi: 10.1164/rccm.201808-1493OC.
7. de Felício CM, da Silva Dias FV, Trawitzki LVV. Obstructive sleep apnea: focus on myofunctional therapy. *Nat Sci Sleep* 2018;10:271-86. doi: 10.2147/NSS.S141132.
8. Patil SP, Ayappa IA, Caples SM, Kimoff RJ, Patel SR, Harrod CG. Treatment of Adult Obstructive Sleep Apnea with Positive Airway Pressure: An American Academy of Sleep Medicine Clinical Practice Guideline. *J Clin Sleep Med* 2019;15(2):335-43. doi: 10.5664/jcsm.7640.
9. Lorenzi-Filho G, Almeida FR, Strollo P. Treating OSA: Current and emerging therapies beyond CPAP. *Respirology* 2017;22:1500-7. doi: 10.1111/resp.13144.
10. Riaz M, Certal V, Nigam G, Abdullatif J, Zaghi S, Kushida CA, et al. Nasal expiratory positive airway pressure devices (Provent) for OSA: a systematic review and meta-analysis. *Sleep Disord* 2015;2015:734798. doi: 10.1155/2015/734798.
11. Colrain IM, Black J, Siegel LC, Bogan RK, Becker PM, Farid-Moayer M, et al. A multicenter evaluation of oral pressure therapy for the treatment of obstructive sleep apnea. *Sleep Med* 2013;14:830-7. doi: 10.1016/j.sleep.2013.05.009.
