# Supplementary material
Source: Elsevier journal article supplement (https://www.sciencedirect.com/science/article/pii/S0300289621004099)
Supplement: mmc10 [file S0300289621004099:mmc10.pdf]

## 2.5. Papel de la medicina de atención primaria en la detección, diagnóstico y seguimiento de la enfermedad. Criterios de derivación del paciente con Apnea Obstructiva del Sueño.

**Nicolás González Mangado** (editor). Jefe de Servicio de Neumología. Director de la Unidad Multidisciplinar de Sueño (UMS). Fundación Jiménez Díaz. Instituto Investigación Sanitaria FJD. Madrid. Centro de Investigación Biomédica en Red de Enfermedades Respiratorias (CIBERES), Madrid, España.

**Eusebi Chiner Vives**. Servicio de Neumología. Unidad Multidisciplinar del Sueño. Hospital Universitario San Juan de Alicante. Alicante.

**Alejandra Roncero Lázaro**. Servicio de Neumología. Unidad Multidisciplinar del Sueño. Hospital San Pedro. Logroño.

La apnea obstructiva del sueño (AOS) es una enfermedad crónica, muy prevalente, que conlleva importantes consecuencias en la salud pública. Por todo ello, no es posible el manejo exclusivo por parte de las unidades de sueño de referencia, siendo necesario un trabajo multidisciplinario, organizado en forma de red asistencial, y en el que estén implicados todos los niveles asistenciales.

Los aspectos clave del papel del médico de atención primaria (MAP) en la AOS se pueden abordar desde los siguientes puntos de vista: 1) mejorar el infradiagnóstico, aumentando el índice de sospecha mediante modelos predictivos; 2) identificar los casos más graves, siendo indispensable la derivación preferente de estos pacientes; 3) desarrollar modelos diagnósticos coordinados mediante el trabajo en red con las unidades de sueño; 4) valorar si es posible iniciar el tratamiento con presión positiva continua en las vías respiratorias (CPAP) desde atención primaria, y 5) por último, dentro del enfoque integral, se encuentra la evaluación, el seguimiento y el tratamiento de las comorbilidades del paciente con AOS.

- 1) Con el objetivo de mejorar el gran problema del infradiagnóstico es fundamental establecer unos criterios sobre los que se base la **sospecha clínica**. En general, la sospecha clínica, y por tanto el proceso diagnóstico, debería iniciarse en todos aquellos pacientes que presenten al menos dos de los tres síntomas principales de la AOS (roncopatía, apneas presenciadas y/o hipersomnolencia diurna excesiva o cansancio intenso no justificado). Sin embargo, estos síntomas no son exclusivos y son frecuentes en la población general, por lo que **NO SE DEBE DERIVAR** a: pacientes roncadores simples, obesos o hipertensos sin otra clínica acompañante o hipersomnolencia justificada por otras causas. Además, se debe tener en cuenta que en ocasiones la AOS se presenta con otros síntomas y/o de forma paucisintomática, como por ejemplo en mujeres, en las que con frecuencia se presenta como cansancio diurno intenso no justificado. Este hecho debe considerarse especialmente en aquellos pacientes con un mayor riesgo cardiovascular, en los que puede ser necesario iniciar el proceso diagnóstico incluso en ausencia de sintomatología florida, o en determinadas circunstancias

para hacer una evaluación específica de las posibles entidades relacionadas con la AOS. Ciertas comorbilidades como la obesidad relevante ( $\text{IMC} > 35$  especialmente si se acompaña de síndrome metabólico), cuello corto y ancho (mayor de 43 cm en hombres y 41 cm en mujeres), HTA refractaria, hipertrofia amigdalar o de partes blandas de la vía aérea superior y/o microrretrognatia u otras causas de estrechamiento de la vía respiratoria superior aumentan la probabilidad de AOS<sup>1</sup> (Figura 1).

Con el fin de mejorar esta sospecha es importante considerar la realización de cuestionarios autorreportados en atención primaria, ya que han demostrado ser tan predictivos como cuando se emplean en una Unidad de Sueño. En este sentido, el cuestionario NoSAS es una herramienta validada con parámetros objetivos: circunferencia del cuello, IMC, ronquidos, edad y sexo, que establece una puntuación NoSAS muy fácil de usar<sup>2</sup>. Otros cuestionarios, como el Berlín<sup>3</sup> o el Stop-Bang<sup>4</sup>, debido a su simplicidad, evidencia y objetividad, deberían ser implementados con fines de cribado. Así, el STOP-BANG aumenta de forma sustancial el diagnóstico de AOS principalmente moderado y grave, por lo que ayudaría a mejorar el infradiagnóstico si se emplea de forma rutinaria<sup>5</sup>. El cuestionario de Berlín, en el ámbito de atención primaria, ha demostrado ser una herramienta útil, fácil de usar y con muy buena sensibilidad y valor predictivo negativo para la AOS grave<sup>6</sup>. También se han desarrollado modelos simplificados incluyendo solo dos ítems objetivos, edad y circunferencia de cuello, con un rendimiento similar a los cuestionarios STOP-BANG y NoSAS, por lo que son una herramienta útil para el cribado de AOS en lugares con recursos limitados<sup>7</sup>. Dentro de los cuestionarios, STOP-BANG es el más ampliamente estudiado, por lo que es el recomendado para el cribado de la AOS por este DIC.

- 2) Las unidades de sueño deben trabajar coordinadas con los MAP, preferiblemente en red, para acordar y unificar los protocolos y criterios de derivación/priorización<sup>8</sup>. En la tabla 1 se recogen los **criterios de derivación preferente** para iniciar el estudio diagnóstico. Aquellos pacientes que no cumplen estos criterios de derivación preferente, pero cumplen los criterios de sospecha clínica deben ser derivados por vía normal. No deben ser derivados los roncadorees simples o aquellos pacientes con obesidad o riesgo cardiovascular que no presenten síntomas compatibles con AOS o cuya hipersomnolencia diurna excesiva podría estar justificada por otras causas. (Tabla 1).

**Tabla 1.** Criterios de derivación preferente de un paciente con sospecha de AOS desde atención primaria a especializada

**Derivación a atención especializada:**

---

**Carácter preferente**

Hipersomnia diurna incapacitante  
 Insuficiencia respiratoria  
 Profesiones de riesgo  
 HTA refractaria  
 Arritmia cardíaca de difícil control  
 Patología secundaria a AOS no controlada

---

**Carácter ordinario**

Resto de pacientes con sospecha de AOS

---

**No derivar**

Roncadores simples  
 Obesos e hipertensos sin otros síntomas acompañantes  
 Hipersomnolencia diurna justificado por otras causas

---

AOS: *apnea obstructiva del sueño*.

- 3) Ante un paciente con sospecha de AOS, se pueden establecer desde atención primaria **modelos de diagnóstico coordinados** con la unidad de sueño de referencia. En estos casos es importante recoger una historia clínica detallada, con la presencia del compañero/a, en la que se especifiquen la edad, los antecedentes personales y familiares, los hábitos de sueño, el perfil psicológico, la ingesta de alcohol o fármacos, las características de la somnolencia, la puntuación en la escala de Epworth (EES)<sup>9</sup>, cuestionarios de cribaje (STOP-BANG) y el tiempo de evolución. Es muy importante realizar un interrogatorio sobre los síntomas de AOS y valorar el tipo y la intensidad del cuadro clínico, con las repercusiones en su vida social y laboral, y las comorbilidades que pueda presentar el paciente: HTA refractaria, insuficiencia cardíaca, cardiopatía isquémica, poliglobulia, etc. También es recomendable atender a una serie de signos como la circunferencia del cuello, el índice de masa corporal (IMC), etc. (v. Figura 1). Un estudio cualitativo entre médicos de atención primaria se planteó analizar las barreras que impiden abordar la evaluación de los trastornos del sueño y cómo optimizar su papel con los especialistas. Los factores identificados fueron la falta de conocimientos, de habilidades y de actitud. Como consecuencia, los pacientes estaban infradiagnosticados, infratratados y con poco nivel de priorización. Se identificaron áreas de mejora en el manejo interdisciplinario del paciente, revelando que existe un déficit de conocimientos sobre este campo en los médicos de atención primaria, por lo que la puesta en

marcha de programas de educación y formación en este ámbito mejorarían el índice de sospecha y la concordancia diagnóstica<sup>10,11</sup>.

**Figura 1.** Criterios de derivación de pacientes con sospecha de apnea obstructiva del sueño (AOS) desde atención primaria. ESD: excesiva somnolencia diurna; FRCV: factores de riesgo cardiovascular; HTA: hipertensión arterial; IMC: índice de masa corporal.

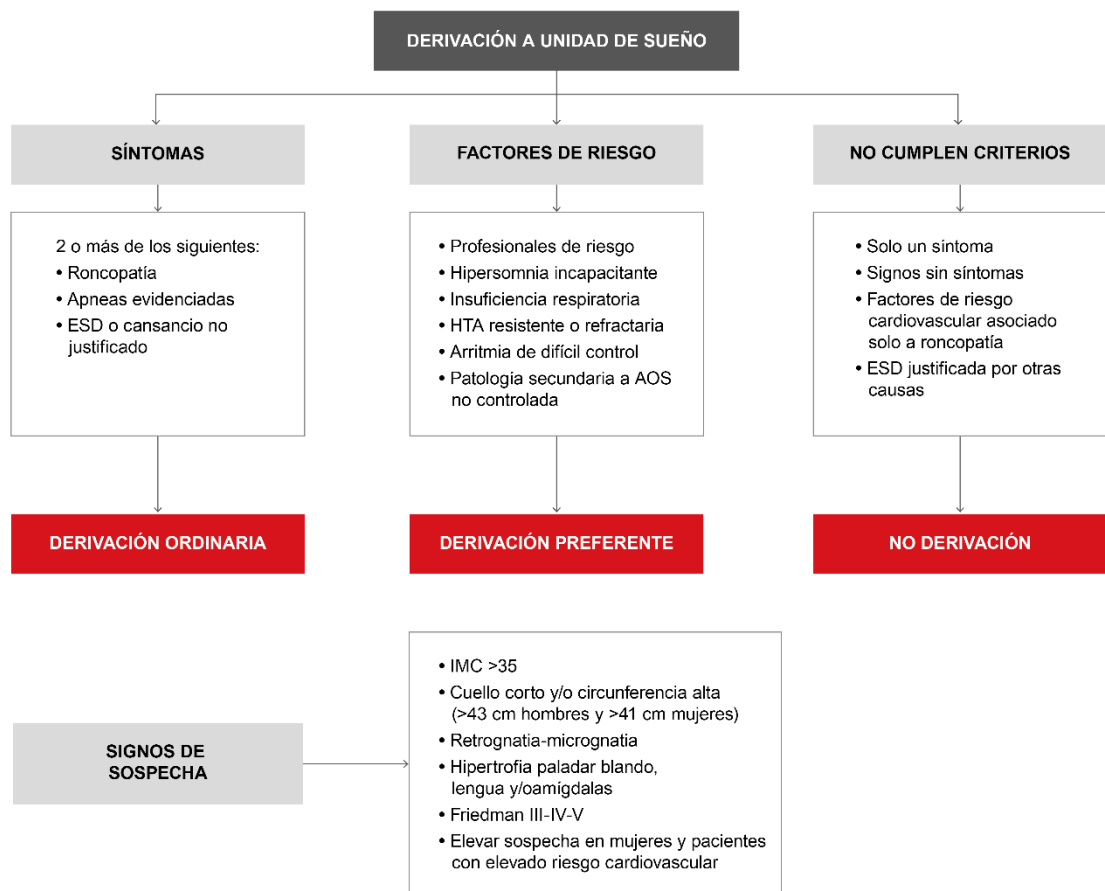

Estudios controlados aleatorizados han demostrado que la gestión ambulatoria de AOS por especialistas en sueño, utilizando poligrafía respiratoria domiciliar y auto-CPAP para estudios de titulación, producen resultados semejantes a los métodos de laboratorio estándar<sup>12</sup>. Sin embargo, los datos son limitados en cuanto a la transferencia de estas pautas a un entorno de atención primaria con un enfoque ambulatorio amplio. La aplicación de métodos supersimplificados, junto con la valoración clínica previa, puede identificar a los pacientes con AOS más graves. Hay que considerar que todos los estudios aleatorizados se han llevado a cabo en entornos con MAP entrenados, lo que introduce sesgos de selección y además enfatiza la importancia de la formación previa de los equipos a la hora de valorar los resultados.

Se han contemplado estudios con modelos combinados. Así, la oximetría nocturna, añadida a un sistema de cribado de riesgo de AOS (Sleep Apnea Clinical Score, SACS), podría evitar las polisomnografías innecesarias en los pacientes con riesgo intermedio, no siendo útil en los pacientes con alto o bajo riesgo<sup>13</sup>, por lo que podría ser utilizada por los MAP como método de cribado y de priorización de pacientes ante las listas de espera.

Así, para comparar la eficacia clínica y los costes en un modelo de diagnóstico simplificado entre MAP y centros especializados, se diseñó un estudio de no inferioridad consistente en combinar oximetría (considerando un índice de desaturación de oxígeno > 16/h) con cuestionarios de síntomas, EES, calidad de vida, adherencia a CPAP, satisfacción del paciente, valorando además los costes de atención sanitaria. Los autores concluyeron que el seguimiento en uno u otro grupo no afectó a los cambios obtenidos en ESS y en otras medidas, de manera que los dos modos de tratamiento pueden ser comparables<sup>14</sup>. Hay que tener en cuenta que la oximetría puede proporcionar falsos negativos, sobre todo en pacientes jóvenes, no obesos y sin otras patologías, en los que las apneas pueden no dar lugar a desaturaciones, así como falsos positivos, particularmente en pacientes con EPOC, insuficiencia cardíaca o enfermedades neuromusculares, en los que a veces hay desaturaciones nocturnas que no están en relación con apneas o hipopneas.

Los sistemas monocal han sido validados y muestran que el análisis automático tiene una precisión diagnóstica similar al manual para niveles intermedios y altos de IAH, permitiendo además iniciar correctamente el tratamiento en la mayoría de los pacientes sintomáticos con sospecha de AOS, por lo que podrían ser aplicados para el manejo de estos pacientes en un entorno de atención primaria<sup>15</sup>. Sin embargo, la introducción de un nuevo procedimiento como podría ser la interpretación de un sistema ultrasimplificado implica una curva de aprendizaje por parte del equipo que se debería tener en cuenta, ya que este aprendizaje suele tener inconvenientes para los pacientes, y además los equipos de trabajo pueden cambiar a lo largo del tiempo.

- 4) En la misma línea, pero abordando también la aplicación de **tratamiento con CPAP**, el *Spanish Sleep Network* (SSN) mostró la no inferioridad del manejo del paciente con probabilidad intermedia-alta de apnea del sueño desde la atención primaria con respecto a la especializada. Los pacientes fueron aleatorizados en dos grupos: uno atendido por MAP y el otro por especialistas de la unidad de sueño. En el grupo atendido por MAP se realizaron estudios de sueño ambulatorios con análisis automático y decisiones terapéuticas semiautomatizadas, mientras que en el atendido en las unidades de sueño el diagnóstico fue realizado por polisomnografía (PSG) completa en el laboratorio y la decisión terapéutica fue tomada por especialistas. En ambos brazos los pacientes podían ser tratados con CPAP o solo con medidas higiénico-dietéticas. Tras 6 meses de seguimiento, el protocolo en atención primaria no fue inferior al especializado en términos de mejora del EES, calidad de vida, presión arterial, incidencia de episodios cardiovasculares, utilización de recursos hospitalarios y adherencia a CPAP, siendo menor el coste en el grupo de primaria, concluyendo que el manejo hospitalario no es necesario para aproximadamente la mitad de

los pacientes con sospecha de AOS<sup>16</sup> (<https://www.youtube.com/watch?v=JGfQqT6BVIg>). Otro estudio multicéntrico aleatorizado del SSN, en este caso para evaluar si el inicio del tratamiento con CPAP en un entorno de atención primaria o especializada afectaba al cumplimiento, demostró que el entorno de primaria era coste-efectivo y no afectaba al cumplimiento, si bien la mejoría en el ESS y la satisfacción del paciente fue superior en el entorno hospitalario<sup>17</sup>. El mismo grupo, en un estudio aleatorizado de no inferioridad, con indicación por los MAP de poligrafía domiciliaria o PSG, mostró hallazgos similares en los cambios de EES y la utilización de recursos, con menor coste<sup>18</sup>.

En un trabajo aleatorizado sobre la implementación de la CPAP, prescrita por especialistas en un laboratorio de sueño o desde la atención primaria, pero ambos bajo una misma dirección del laboratorio, los pacientes tratados por especialistas en el sueño presentaron mayor conciencia del proceso de la enfermedad y la sospecha fue más adecuada que en los pacientes tratados por los médicos de atención primaria. Sin embargo, no hubo diferencias entre la aceptación o el cumplimiento entre ambos grupos a largo plazo<sup>19</sup>.

Es importante recordar que estos estudios están realizados con equipos de atención primaria previamente instruidos y formados para las tareas que hay que llevar a cabo.

Por lo tanto, este DIC establece que el diagnóstico de AOS debe hacerse de forma definitiva por una unidad de sueño de referencia.

- 5) En relación con el **seguimiento del tratamiento de la AOS**, puede hacerse en atención primaria con:
- a. Aplicación de medidas de higiene de sueño en TODOS los pacientes con sospecha/diagnóstico de AOS.
  - b. Control de las comorbilidades de todos los pacientes con AOS.
  - c. En pacientes en tratamiento con CPAP y buenos cumplidores del tratamiento, el MAP deberá tratar los efectos secundarios leves (conjuntivitis, rinitis, etc.) y volver a derivar al paciente a la unidad de sueño de referencia si reaparecen los síntomas, hay incumplimiento o intolerancia, efectos secundarios moderados o graves o cambios de peso considerables (> 10%).
  - d. Los pacientes que rechazaron o no toleraron CPAP deberán volver a remitirse a la unidad de sueño de referencia si desean reiniciar tratamiento con CPAP.
  - e. Los pacientes sin indicación de CPAP se remitirán a la unidad de sueño si aparecen criterios que indicarían una nueva valoración, como la excesiva somnolencia diurna o aparición de nuevos factores de riesgo cardiovascular.
  - f. Se puede plantear el alta por la unidad de sueño especializada y el seguimiento exclusivo por el MAP, según los recursos y listas de espera

del centro, cuando el paciente se encuentre estable, con buen cumplimiento terapéutico, ausencia de efectos secundarios graves y más de 1 año de tratamiento.

En la **figura 2** se recoge un resumen de las principales acciones del MAP en el manejo de la AOS.

**Figura 2.** Propuesta de las principales áreas de actuación de atención primaria en la asistencia de pacientes con apnea obstructiva del sueño (AOS). CPAP: presión positiva continua en las vías respiratorias; ESD: excesiva somnolencia diurna; HTA: hipertensión arterial; FRCV: factores de riesgo cardiovascular.

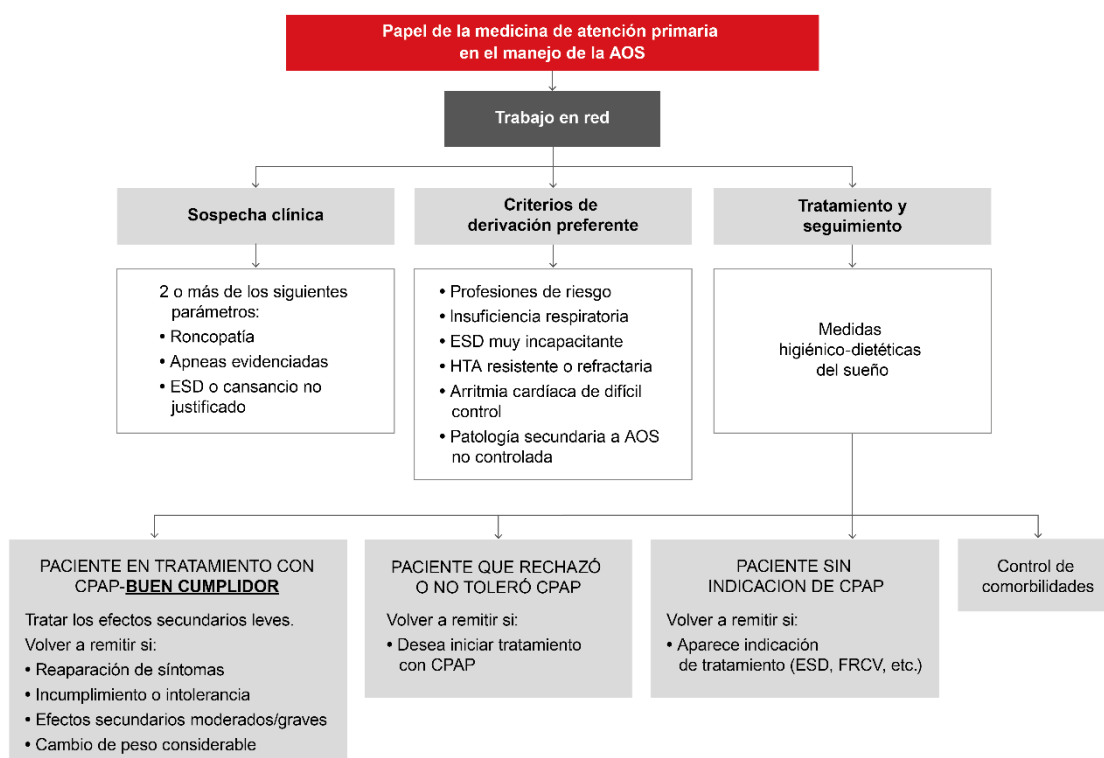



## BIBLIOGRAFÍA:

1. Chiner E, Sancho-Chust JN, Barbé F. Specific diagnosis and clinical pathways in at-risk populations. *ERS Monograph* 2015;67:147-60.
2. Mitropoulou G, Haba-Rubio J, Heinzer R. NoSAS score: A screening tool for sleep-disordered breathing in primary care. [French]. *Praxis* 2018;107:323-7.
3. Senaratna CV, Perret JL, Matheson MC, Lodge CJ, Lowe AJ, Cassim R, et al. Validity of the Berlin questionnaire in detecting obstructive sleep apnea: A systematic review and meta-analysis. *Sleep Med Rev* 2017;36:116-24. doi: 10.1016/j.smrv.2017.04.001.
4. Chung F, Abdullah HR, Liao P. STOP-Bang Questionnaire: A Practical Approach to Screen for Obstructive Sleep Apnea. *Chest* 2016;149:631-8. doi: 10.1378/chest.15-0903.
5. Ononye T, Nguyen K, Brewer E. Implementing protocol for obstructive sleep apnea screening in the primary care setting. *Appl Nurs Res* 2019;46:67-71. S0897-1897(18)30502-0. doi: 10.1016/j.apnr.2019.02.005.
6. Tan A, Yin JD, Tan LW, van Dam RM, Cheung YY, Lee CH. Using the Berlin Questionnaire to Predict Obstructive Sleep Apnea in the General Population. *J Clin Sleep Med* 2017;13:427-32. doi: 10.5664/jcsm.6496.
7. Duarte RLM, Rabahi MF, Magalhaes-da-Silveira FJ, de Oliveira TS, Mello FCQ, Gozal D. Simplifying the Screening of Obstructive Sleep Apnea With a 2-Item Model, No-Apnea: A Cross-Sectional Study. *J Clin Sleep Med* 2018;14:1097-107. doi: 10.5664/jcsm.7202.
8. Montserrat JM, Chiner E, León A, Luque R, Maimó A, Maldonado JA. Organización asistencial, coordinación y gestión de las unidades de sueño. Relaciones con primaria y escalones asistenciales. *Arch Bronconeumol* 2002;38 (Supl 3):46-5.
9. Chiner E, Arriero JM, Signes-Costa J, Marco J, Fuentes I. Validation of the Spanish version of the Epworth Sleepiness Scale in patients with a sleep apnea syndrome. *Arch Bronconeumol* 1999;35:422-7.
10. Reuveni H, Tarasiuk A, Wainstock T, Ziv A, Elhayany A, Tal A. Awareness level of obstructive sleep apnea syndrome during routine unstructured interviews of a standardized patient by primary care physicians. *Sleep* 2004;27:1518-25. doi: 10.1093/sleep/27.8.1518.
11. Martínez-García MA, Soler-Cataluña JJ, Román-Sánchez P, Amorós C, Quiles L, Chiner-Vives E, et al. Efficacy of a training program on sleep apnea-hypopnea syndrome aimed at primary care physicians. *Arch Bronconeumol* 2008;44:15-21.
12. Corral J, Sánchez-Quiroga MÁ, Carmona-Bernal C, Sánchez-Armengol Á, de la Torre AS, Durán-Cantolla J, et al; Spanish Sleep Network. Conventional Polysomnography Is Not Necessary for the Management of Most Patients with Suspected Obstructive Sleep Apnea. Noninferiority, Randomized Controlled Trial. *Am J Respir Crit Care Med* 2017;196(9):1181-90. doi: 10.1164/rccm.201612-2497OC.
13. Grover M, Mookadam M, Chang YH, Parish JM. Obstructive sleep apnea: A better Dx model for primary care. *Journal of Family Practice* 2018;67:E1-E7.



14. Chai-Coetzer CL, Antic NA, Rowland LS, Reed RL, Esterman A, Catchside PG, et al. Primary care vs specialist sleep center management of obstructive sleep apnea and daytime sleepiness and quality of life: a randomized trial. *JAMA* 2013;309:997-1004. doi: 10.1001/jama.2013.1823.
15. Masa JF, Duran-Cantolla J, Capote F, Cabello M, Abad J, García-Río F, et al; Spanish Sleep Network. Efficacy of home single-channel nasal pressure for recommending continuous positive airway pressure treatment in sleep apnea. *Sleep* 2015;38:13-21. doi: 10.5665/sleep.4316.
16. Sánchez-Quiroga MA, Corral J, Gómez-de-Terreros FJ, Carmona-Bernal C, Asensio-Cruz MI, Cabello M, et al. Primary Care Physicians Can Comprehensively Manage Sleep Apnea Patients: A Non-inferiority Randomized Controlled Trial. *Am J Respir Crit Care Med* 2018;198:648-56. doi: 10.1164/rccm.201710-2061OC.
17. Sánchez-de-la-Torre M, Nadal N, Cortijo A, Masa JF, Duran-Cantolla J, Valls J, et al. Role of primary care in the follow-up of patients with obstructive sleep apnoea undergoing CPAP treatment: a randomised controlled trial. *Thorax* 2015;70:346-52. doi: 10.1136/thoraxjnl-2014-206287.
18. Tarraubella N, Sánchez-de-la-Torre M, Nadal N, De Batlle J, Benítez I, Cortijo A, et al. Management of obstructive sleep apnoea in a primary care vs sleep unit setting: a randomised controlled trial. *Thorax* 2018;73:1152-60. doi: 10.1136/thoraxjnl-2017-211237.
19. Scharf SM, DeMore J, Landau T, Smale P. Comparison of primary-care practitioners and sleep specialists in the treatment of obstructive sleep apnea. *Sleep Breath* 2004;8:111-24. doi: [10.1007/s11325-004-0111-6](https://doi.org/10.1007/s11325-004-0111-6).
