# Supplementary material
Source: Elsevier journal article supplement (https://www.sciencedirect.com/science/article/pii/S0300289621004099)
Supplement: mmc11 [file S0300289621004099:mmc11.pdf]

## 2.6. Otras apneas durante el sueño. Apnea central del sueño

**Carlos EgeaSantaolalla** (editor). Unidad Funcional de Sueño, Hospital Universitario Araba, OSI Araba, Vitoria, E Centro de Investigación Biomédica en Red (CIBERES). Madrid. España.

**María Fernanda Troncoso Acevedo**. Servicio de Neumología. Unidad Multidisciplinar del Sueño. Fundación Jiménez Díaz. Madrid.

### 1. Introducción

La transición de la vigilia al sueño va acompañada de cambios fisiológicos que producen alteraciones importantes en el control de la respiración y pueden provocar trastornos respiratorios durante el sueño (TRS). Dentro de estos trastornos, la apnea central del sueño (ACS) es una manifestación de la inestabilidad de la respiración central. La hipoventilación o hipocapnia que se produce después de una hiperventilación inicia una cascada de episodios que perpetúan la inestabilidad respiratoria provocando apneas centrales recurrentes e incluso estrechamiento de la vía aérea superior (VAS), manifestándose por una diversidad de condiciones clínicas<sup>1</sup>.

Los mecanismos fisiopatológicos subyacentes de los TRS, en varias ocasiones, se superponen. De hecho, la inestabilidad respiratoria y el estrechamiento de la VAS son elementos clave tanto en la apnea central como en la obstructiva. Por esto, varias de las opciones terapéuticas actuales para la ACS derivan de abordajes utilizados para el tratamiento de la apnea obstructiva del sueño (AOS).

Las estrategias de manejo deben ser individualizadas, incorporando características clínicas, condiciones comórbidas y hallazgos polisomnográficos. Es importante iniciar el tratamiento en función de los síntomas, el impacto en las comorbilidades y el resultado terapéutico. El tratamiento óptimo de los factores de riesgo y de las comorbilidades clínicas concomitantes es el primer escalón terapéutico que puede mejorar la severidad de la apnea central<sup>2</sup>.

El diagnóstico y el tratamiento óptimo del componente central en un TRS es un desafío importante debido a la complejidad de las enfermedades comórbidas y el impacto pronóstico de las opciones terapéuticas.

### 2. Definición

La definición de la ACS varía en la literatura médica según la población estudiada, la sospecha etiológica o la inclusión de hipopneas centrales. En adultos, la ACS se define, según la tercera Clasificación Internacional de Trastornos del Sueño (ICSD-3), cuando hay un índice de apnea-hipopnea (IAH) > 5 episodios/h de sueño, si más del 50% de los episodios respiratorios son centrales. En pacientes con insuficiencia cardíaca (IC), la ACS generalmente se diagnostica cuando hay más de 15 episodios/h con al menos el 50% de estos episodios de carácter central, incluyendo hipopneas centrales<sup>3,4</sup>.

En la ACS existen patrones polisomnográficos (PSG) característicos asociados a una variedad de entidades clínicas. Se observan apneas e hipopneas centrales aisladas, respiración periódica con aumento y descensos cíclicos en el flujo aéreo y en el esfuerzo ventilatorio o un patrón irregular o atáxico. Se recomienda describir con precisión los patrones respiratorios observados en una PSG con el fin de identificar los factores de riesgo y las posibles etiologías subyacentes, a veces superpuestas, para mejorar el diagnóstico y su abordaje terapéutico<sup>2</sup>.

Separar las hipopneas centrales de las obstructivas es uno de los desafíos más difíciles para los técnicos de sueño a la hora de puntuar los episodios respiratorios anormales en un estudio de sueño. Los criterios de hipopnea central son consenso de expertos y, como vemos frecuentemente en la práctica clínica, no siempre se ajustan a la realidad. En ocasiones las hipopneas centrales cursan con cierre parcial de la VAS y consecuentemente se amputa la señal inspiratoria, la oposición de bandas en las hipopneas obstructivas frecuentemente está ausente y hay veces que los pacientes con episodios centrales roncan. Actualmente, esta diferenciación es un paso crucial y necesario en el diagnóstico de la ACS<sup>5-7</sup>, pero hay ocasiones en que la sospecha de la presencia de episodios centrales viene por el contexto clínico y puede resultar imposible diferenciar hipopneas obstructivas y centrales.

La **tabla 1** resume las definiciones y la nomenclatura de los episodios respiratorios centrales que acepta este DIC (v. sección 2.1., Tabla 2 Definición y nomenclatura aceptadas por este DIC de los episodios respiratorios).

**Tabla 1.** Definición de episodios respiratorios centrales.

|                              |                                                                                                                                                                                                                                                                                                                                                                                                                                                                                                                                                                                                                                                                                                                                                                                       |
|------------------------------|---------------------------------------------------------------------------------------------------------------------------------------------------------------------------------------------------------------------------------------------------------------------------------------------------------------------------------------------------------------------------------------------------------------------------------------------------------------------------------------------------------------------------------------------------------------------------------------------------------------------------------------------------------------------------------------------------------------------------------------------------------------------------------------|
| <b>Apnea central</b>         | Ausencia o reducción $\geq 90\%$ de la señal respiratoria de $\geq 10$ s de duración en ausencia de esfuerzo respiratorio                                                                                                                                                                                                                                                                                                                                                                                                                                                                                                                                                                                                                                                             |
| <b>Hipopnea central</b>      | <p>Reducción discernible (aproximadamente <math>&gt; 30\%</math> y <math>&lt; 90\%</math>) de la amplitud de la señal respiratoria de <math>\geq 10</math> s de duración que se acompaña de una desaturación (<math>\geq 3\%</math>) y/o un microdespertar en el electroencefalograma</p> <p>Se considera hipopnea central cuando existe una reducción proporcional del flujo inspiratorio y la amplitud del movimiento toracoabdominal sin cumplir los criterios de hipopnea obstructiva. No debe aparecer:</p> <ul style="list-style-type: none"> <li>• Ronquido durante el episodio</li> <li>• Movimiento paradójico toracoabdominal durante el episodio y no previamente</li> <li>• Un aplanamiento inspiratorio de la onda de presión respecto a la respiración basal</li> </ul> |
| <b>Respiración periódica</b> | Debe cumplir ambos criterios:                                                                                                                                                                                                                                                                                                                                                                                                                                                                                                                                                                                                                                                                                                                                                         |

|                                                     |                                                                                                                                                                                                                                                                                                                                                                                                           |
|-----------------------------------------------------|-----------------------------------------------------------------------------------------------------------------------------------------------------------------------------------------------------------------------------------------------------------------------------------------------------------------------------------------------------------------------------------------------------------|
| <p>o</p> <p><b>Respiración de Cheyne-Stokes</b></p> | <p>- Episodios de <math>\geq 3</math> apneas y/o hipopneas centrales consecutivas separadas por un cambio en la amplitud en la respiración en patrón creciente y decreciente con una duración del ciclo de <math>\geq 40</math> s</p> <p>- 5 o más apneas y/o hipopneas centrales por hora de sueño asociado al patrón respiratorio creciente y decreciente durante <math>\geq 2</math> h de registro</p> |
|-----------------------------------------------------|-----------------------------------------------------------------------------------------------------------------------------------------------------------------------------------------------------------------------------------------------------------------------------------------------------------------------------------------------------------------------------------------------------------|

En el último documento de consenso sobre la ACS de la Sociedad Respiratoria Europea<sup>7</sup>, los expertos aconsejan describir los patrones de respiración anormales de origen central que aparezcan durante un registro y que además se identifique y describa por separado cualquier enfermedad subyacente o factor de riesgo para así evitar simplificar la patogénesis a una sola de varias posibles causas relevantes.

Una hipopnea se considera central si no hay ronquido durante el episodio, si no hay limitación al flujo durante el episodio y si las bandas toracoabdominales están en fase (sin oposición). Existen otros patrones polisomnográficos descritos en la literatura (no consensuados) que nos pueden ayudar a reconocer la naturaleza central del episodio respiratorio como son: la forma de *crescendo-decrescendo* en el flujo inspiratorio, una desaturación limitada (no profunda), una resaturación de oxígeno más elevada que la saturación basal después del episodio, el aspecto simétrico de las bandas, la desaparición de los episodios centrales en la fase de sueño con movimiento rápido de ojos (REM) (excepto si hay hipoventilación) y si se produce un *arousal* este ocurre en el medio de la hiperventilación<sup>7</sup>.

### 3. Clasificación

Según la Clasificación Internacional de los trastornos del sueño ICSD-3<sup>8</sup>, la ACS se clasifica en:

1. ACS con respiración Cheyne-Stokes (RCS).
2. ACS debida a un trastorno médico sin respiración Cheyne-Stokes.
3. ACS debida a la respiración periódica a gran altitud.
4. ACS debida a un medicamento o sustancia.
5. ACS primaria o idiopática.
6. ACS primaria de la infancia.
7. ACS primaria del prematuro.
8. ACS emergente o secundaria a tratamiento con presión positiva continua en las vías respiratorias (CPAP).

Esta clasificación puede ser útil clínicamente para identificar entidades relacionadas con la aparición de la ACS. Sin embargo, no se relaciona con los mecanismos fisiopatológicos subyacentes, dificultando las decisiones terapéuticas. Además, en la

práctica clínica, un paciente puede presentar varias patologías que predispongan a generar apneas centrales y esta clasificación solo permite asociarlo a una entidad excluyendo otras enfermedades subyacentes<sup>3</sup>. Este DIC aconseja utilizar la clasificación fisiopatológica.

Según el punto de vista fisiopatológico<sup>9</sup> se pueden distinguir 2 subtipos específicos de ACS según los niveles de presión arterial de dióxido de carbono (PaCO<sub>2</sub>) en vigilia:

1. ACS hipercápnicas.
2. ACS eucápnicas o hipocápnicas.

En la **tabla 2** se describen las posibles entidades médicas de cada grupo.

**Tabla 2.**

| <b>Apnea central del sueño hipercápnicas</b>                                                                | <b>Apnea central del sueño normohipocápnica</b> |
|-------------------------------------------------------------------------------------------------------------|-------------------------------------------------|
| Síndrome de hipoventilación alveolar central congénita o idiopática                                         | Insuficiencia cardíaca                          |
| Síndrome de hipoventilación-obesidad                                                                        | Respiración periódica por altitud               |
| Opiáceos                                                                                                    | ACS idiopática                                  |
| Enfermedad pulmonar obstructiva crónica                                                                     | Enfermedad cerebrovascular                      |
| Enfermedades neuromusculares: enfermedad de la motoneurona, poliomielitis, neuropatía, miastenia, miopatías | Insuficiencia renal en estadio avanzado         |
| Alteraciones restrictivas toracógenas: cifoescoliosis                                                       | Acromegalia                                     |
| Lesiones estructurales: tumor cerebral, síndrome de Arnold-Chiari, enfermedades cerebrovasculares           | ACS emergente a tratamiento                     |

ACS: apnea central del sueño.

#### **4. Fisiopatología**

Los subtipos hipercápnicos o no hipercápnicos se caracterizan por mecanismos fisiopatológicos y patrones respiratorios característicos. El patrón respiratorio puede contribuir a la identificación de la enfermedad de base o el contexto en que la ACS haya aparecido. Un conocimiento preciso de la fisiopatología es esencial para mejorar el diagnóstico y el tratamiento<sup>6</sup> (**Figura 1**).

**Figura 1.** Dos patrones respiratorios característicos de la apnea central del sueño (ACS). Identificar el patrón respiratorio puede ayudar a conocer los factores de riesgo o la etiología causante de la ACS. En el gráfico *superior* el patrón respiratorio se caracteriza por ciclos de respiración más o menos prolongados (45 a 75 s) con alternancia entre períodos de hiperpneas y de apneas/hipopneas centrales, respiración periódica o de Cheyne-Stokes. El principal mecanismo subyacente es la inestabilidad en el control ventilatorio. Esto se manifiesta típicamente por una  $\text{PaCO}_2$  baja, hiperventilación crónica y un alto impulso respiratorio. En el gráfico *inferior* el patrón de respiración puede ser errático con más o menos ventilación atáxica e hipoventilación durante el sueño REM. La ACS hipercápnica se produce por lesiones funcionales o anatómicas a nivel del centro respiratorio que reducen el impulso ventilatorio o por una incapacidad para traducir el impulso central en una ventilación adecuada.

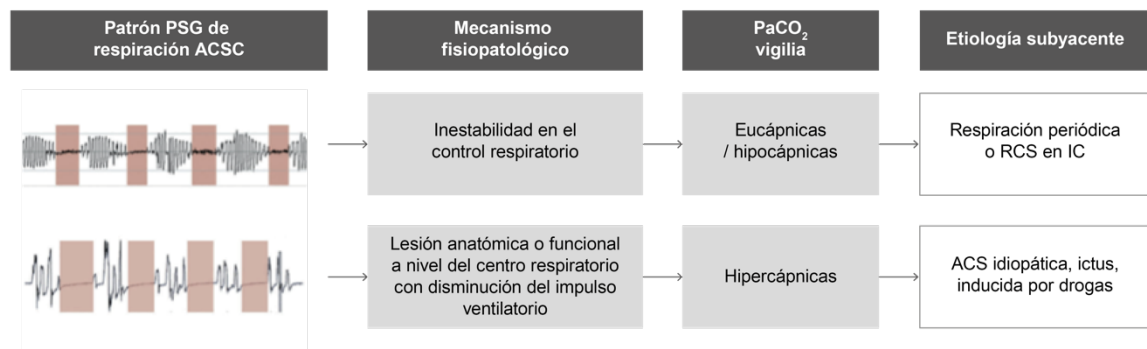

La ACS hipercápnica se produce por lesiones funcionales o anatómicas a nivel del centro respiratorio que reducen el impulso ventilatorio o por una incapacidad para traducir el impulso central en una ventilación adecuada. El patrón de respiración puede ser errático con más o menos ventilación atáxica e hipoventilación durante el sueño REM.

En la ACS eucápnica o hipocápnica, el principal mecanismo subyacente es la inestabilidad en el control ventilatorio. Esto se manifiesta típicamente por una  $\text{PaCO}_2$  baja, hiperventilación crónica y un alto impulso respiratorio. El patrón respiratorio se caracteriza por ciclos de respiración más o menos prolongados con alternancia entre períodos de hiperpneas y de apneas/hipopneas centrales (respiración periódica). Este patrón ocurre principalmente al comienzo del sueño, en los períodos de transición sueño-vigilia o en las fases de sueño superficial sin movimiento rápido de ojos (no-REM). En estas fases de sueño el control suprapontino de la ventilación está inactivo y la ventilación está regulada por factores metabólicos, principalmente por lo niveles de  $\text{PaCO}_2$ <sup>10,11</sup>.

En la ACS existen 2 factores determinantes que afectan a la inestabilidad del control ventilatorio que son la alta ganancia de circuito (*high loop gain*) y la baja reserva de  $\text{PaCO}_2$ . Así, como la diferencia entre el umbral eupneico y apneico de la  $\text{PaCO}_2$  es

estrecha, un leve aumento de la ventilación hace que la  $\text{PaCO}_2$  caiga bajo el umbral apneico y se desarrolla una apnea central.

La ganancia del circuito (*loop gain*), en términos coloquiales, bucle de control/adquisición de señales, se define como la magnitud de la respuesta ante una alteración determinada y tiene tres componentes principales:

1. La ganancia del controlador (*controller gain*), que se traduce en la quimiosensibilidad del centro respiratorio en dar una respuesta (cambio en la ventilación-minuto) al estímulo hipóxico/hipercápnic (cambio en la  $\text{PaCO}_2$ ).
2. La ganancia de la planta (*plant gain*), que se refiere a la efectividad de la ventilación generada por la bomba ventilatoria, o sea, los pulmones y los músculos respiratorios, para eliminar la  $\text{PaCO}_2$  (respuesta en los gases en sangre ante un cambio en la ventilación-minuto).
3. La ganancia de retroalimentación (*feedback gain*), que es el tiempo de circulación y está determinado por el gasto cardíaco; es lo que demora la señal de retroalimentación en ir desde el pulmón de regreso al centro respiratorio<sup>4,10-12</sup> (Figura 2).

**Figura 2.** Esquema del *loop gain*. La ganancia del circuito se puede definir como la magnitud de la respuesta a una alteración determinada y tiene tres componentes principales: la ganancia del controlador ( $\Delta\text{Ventilación}/\Delta\text{PaCO}_2$ , es decir, cambio en la ventilación/min en respuesta a un cambio en la  $\text{PaCO}_2$ ), la ganancia de la planta ( $\Delta\text{PaCO}_2/\Delta\text{Ventilación}$ , es decir, respuesta de gases en sangre a un cambio en la ventilación/min, principalmente afectada por los niveles de  $\text{CO}_2$  de referencia y el volumen pulmonar) y la ganancia de retroalimentación, la velocidad en que va la señal de la planta al controlador, determinada principalmente por el tiempo de circulación (es decir, el gasto cardíaco). Una ganancia del circuito alta se define como una relación  $> 1$ , es decir, una respuesta desproporcionada a un estímulo dado, que promueve la inestabilidad del sistema. El principal determinante de una alta ganancia del circuito es una mayor quimiosensibilidad al  $\text{CO}_2$ , es decir, mayor ganancia del controlador. Cuando se combina con una reserva de  $\text{CO}_2$  estrecha, se iniciará un ciclo de apnea central inducida por hipocapnia. Una alteración, como es el caso de una hiperventilación, evidencia disminución de los niveles de  $\text{PCO}_2$ , que tras un retraso circulatorio el controlador detecta el cambio de gas en sangre y disminuye su respuesta para contrarrestar la original, provocándose una apnea central y un aumento en los niveles de  $\text{PaCO}_2$  (ganancia de la planta). En la alta ganancia del circuito, cada respuesta a una alteración o estímulo es mayor que la inicial, lo que resulta en una hiperpnea correctiva que enviará los niveles de  $\text{PaCO}_2$  hacia los límites de la reserva de  $\text{CO}_2$  y una nueva oscilación del sistema ventilatorio.

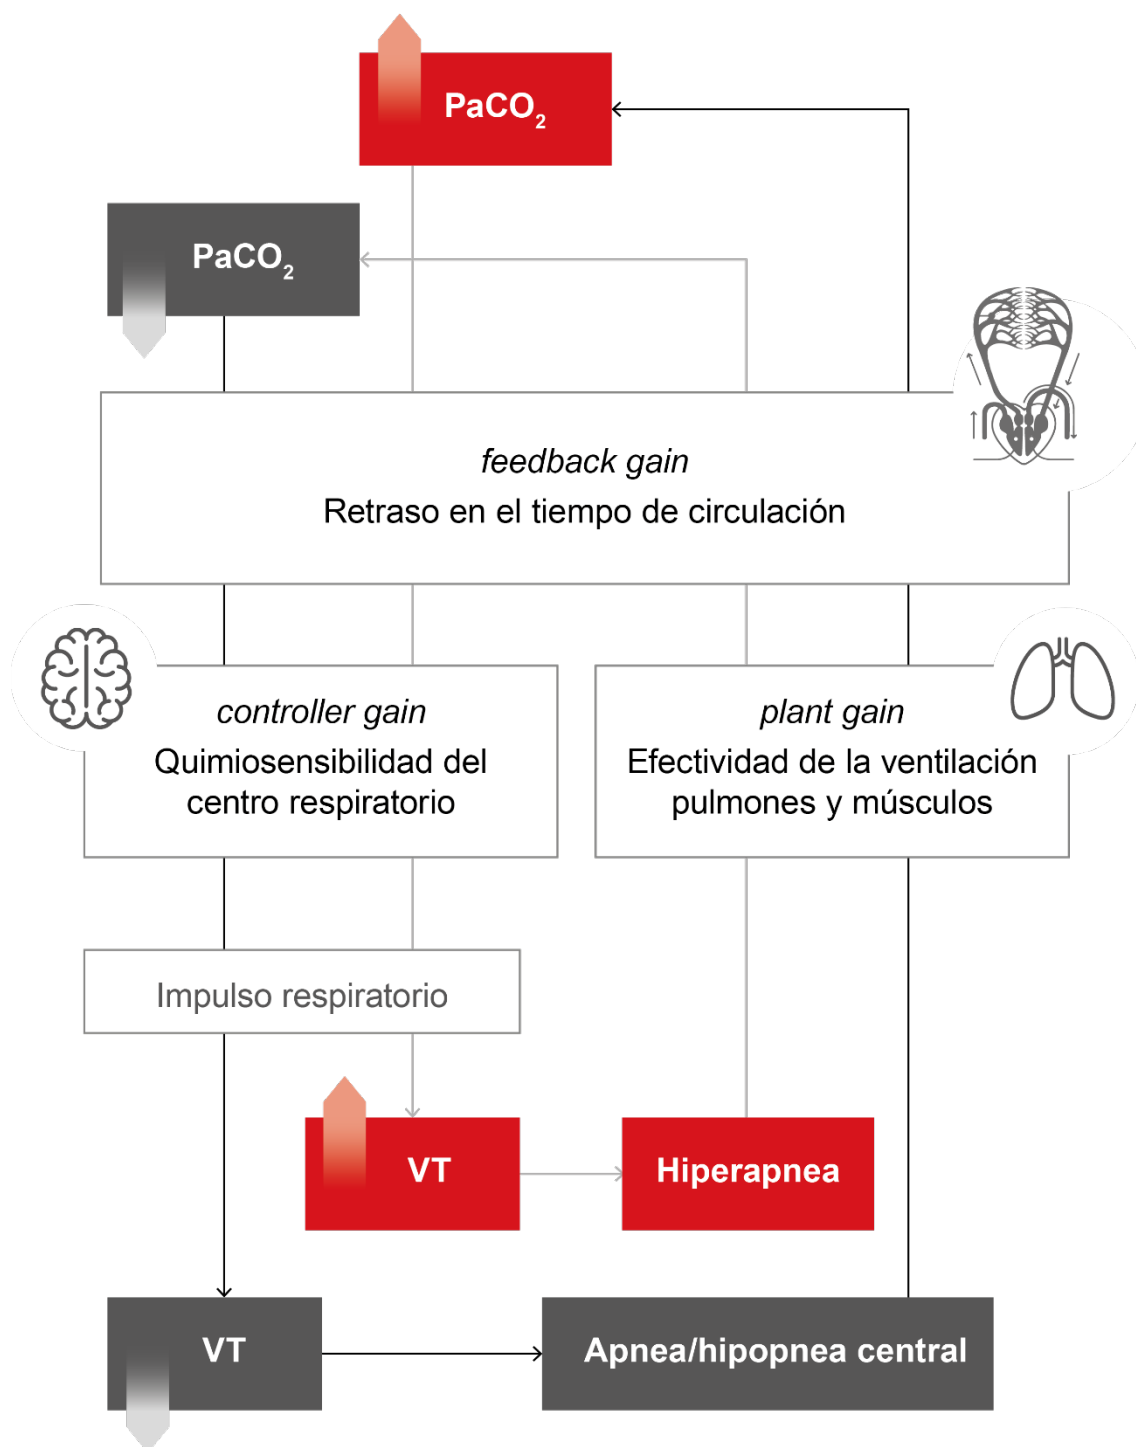

Si la respuesta es alta, el sistema responde de forma rápida e intensa a una pequeña alteración; por el contrario, si la respuesta es baja, el sistema responde de forma más lenta y débil.

La ACS desencadena una cascada de consecuencias fisiológicas que incluyen desaturación de oxígeno arterial, hipercapnia, fragmentación del sueño y aumento de la presión arterial, que a su vez producen activación simpática. Esto puede potencialmente agravar la enfermedad subyacente y aumentar el riesgo de episodios cardiovasculares y mortalidad, similar a lo que ocurre en la AOS. Sobre las consecuencias de la ACS y el impacto de las estrategias de tratamiento a largo plazo, queda aún mucho por esclarecer.

## **5. Diagnóstico y características clínicas**

El mejor método diagnóstico en la ACS es la PSG nocturna con medición de la presión esofágica. La PSG requiere un adecuado control de calidad y la utilización de los sensores adecuados para la correcta puntuación de los episodios centrales. La evidencia muestra que la cánula nasal es el mejor sensor validado para la detección de hipopneas por su buena frecuencia de muestreo. El termistor, que analiza el flujo oronasal, es el sensor recomendado para la detección de apneas. Las hipopneas centrales son difíciles de puntuar y para diferenciarlas de las obstructivas es necesario conocer si estamos en la transición sueño-vigilia y en fase de sueño REM y no-REM. La información sobre el esfuerzo respiratorio es obligatoria y los sensores más utilizados son las bandas toracoabdominales, especialmente la pletismografía de inductancia (AASM, manual de puntuación).

La oscilación entre vigilia y sueño ligero no-REM provoca una oscilación de  $\text{PaCO}_2$  alrededor del umbral apneico, por lo que un sueño superficial y menos estructurado puede estar asociado con la aparición de apneas centrales recurrentes que se resuelven con la consolidación del sueño y la estabilización de  $\text{PaCO}_2$ . El inicio del sueño también se asocia con la prolongación de la duración del tiempo entre cada respiración, que puede manifestarse como apnea central en algunos individuos. Por lo tanto, la apnea central transitoria al inicio del sueño puede ser un fenómeno normal<sup>3,13</sup>.

En la PSG, la ACS se puede presentar con eventos respiratorios centrales de forma irregular o de forma cíclica/periódica, estos últimos se caracterizan por ser oscilantes y más sostenidos. Durante el sueño REM, en la ACS normocápnica, no suelen observarse episodios centrales, ya que el control respiratorio es principalmente cortical y no depende como en el sueño no-REM de la  $\text{PaCO}_2$  y del umbral apneico. Otra característica polisomnográfica es que en pacientes con IC crónica con disfunción ventricular izquierda y ACS, el número y la duración de las apneas centrales aumentan durante las últimas horas de sueño<sup>4,9</sup>.

Otro punto importante en el diagnóstico es puntuar correctamente los episodios centrales en una PSG de titulación bajo terapia de presión positiva (PAP). Al resolverse la obstrucción de la VAS se elimina más efectivamente la  $\text{PaCO}_2$ ; esta hipocapnia puede traspasar el umbral de apnea e inducir apneas centrales que desaparecerán una vez que el sistema se adapte al nuevo punto de ajuste (inestabilidad ventilatoria transitoria). Al realizar una PSG de noche partida, debemos tener en cuenta que los episodios obstructivos y centrales se distribuyen heterogéneamente durante toda la noche, y podemos subestimar los trastornos centrales preexistentes que aparecerían en la segunda parte de noche<sup>14</sup>.

Las características clínicas de esta entidad van a depender de las enfermedades subyacentes, de los factores de riesgo y de la manifestación como hipercápnica o normocápnica. La ACS hipercápnica se suele manifestar por disnea, junto con ronquido, mala calidad de sueño, excesiva somnolencia diurna (ESD) y cefalea matutina. La ACS normocápnica puede presentar los síntomas habituales de la apnea del sueño, aunque generalmente no refieren ronquido ni ESD y el insomnio, el cansancio o fatiga y la depresión suelen ser los síntomas característicos<sup>1,3,15</sup>.

Actualmente, al hacer el diagnóstico, se recomienda identificar y describir cualquier enfermedad subyacente o factor de riesgo de ACS para evitar simplificar la patogénesis a una sola de varias causas relevantes y así tener un mejor abordaje terapéutico<sup>15</sup>.

## **6. Trastornos médicos asociados a la Apnea Central del Sueño**

### **6.1. Insuficiencia cardíaca**

La Insuficiencia cardíaca (IC) es la afección más comúnmente asociada con la ACS. La ACS ocurre hasta en un tercio de los pacientes con IC crónica estable, tanto con fracción de eyección del ventrículo izquierdo reducida (FEVlr) como conservada (FEVlc)<sup>16,17</sup>. La gravedad de la ACS está relacionada con la gravedad de la IC<sup>15</sup> y empeora durante las descompensaciones<sup>18,19</sup>. Los factores de riesgo para desarrollar ACS son el género masculino, mayor de 60 años, ingresos frecuentes por descompensación de la IC, FEVlr,  $\text{PaCO}_2 < 38$  mmHg durante la vigilia y fibrilación auricular<sup>20</sup>. La ACS influye de manera importante en el mal pronóstico de pacientes con disfunción ventricular izquierda, aumentando el riesgo de arritmias y promoviendo las arritmias ventriculares malignas<sup>21,22</sup>. Además, la ACS moderada ( $\text{IAH} \geq 20$  episodios/h) se asocia de forma independiente con mayor mortalidad, donde la hipoxemia intermitente nocturna tiene un papel crucial, ya que contribuye a mayor actividad simpática, que es un factor establecido en la progresión de la IC y la mortalidad<sup>15,18,23</sup>. Hay que destacar que la ACS también es altamente prevalente en pacientes con disfunción ventricular izquierda asintomática y contribuye a la progresión de la disfunción del ventrículo izquierdo y a la aparición de síntomas<sup>24,25</sup>.

La respiración periódica o respiración de Cheyne-Stokes (RCS) es el patrón respiratorio típico de la ACS en la IC crónica. Se caracteriza por episodios apneas/hipopneas centrales repetitivas, seguidas por un cambio en la amplitud en la respiración con un patrón creciente y decreciente y con una duración prolongada del ciclo (45 a 75 s). La quimiosensibilidad central (alta ganancia del circuito), el bajo gasto cardíaco (retraso en la respuesta), la alta activación simpática y la congestión pulmonar (que desencadena la hiperventilación que disminuye la  $\text{PaCO}_2$  por debajo del umbral apneico) son factores que están involucrados en la patogénesis, desarrollo y duración de la inestabilidad de la respiración de la ACS y RCS<sup>4,20</sup>.

Se ha postulado, tras los resultados del estudio SERV-HF<sup>26</sup>, la hipótesis de que la RCS podría ser un patrón adaptativo y tener un papel protector y limitar los efectos nocivos de la IC con fracción de eyección del ventrículo izquierdo reducida (FEVlr). Se ha observado que, si tras la hipo e hiperventilación periódica el volumen pulmonar espiratorio final cae por debajo de la capacidad residual funcional, se produce un

aumento significativo en la presión intratorácica espiratoria, lo que podría servir para apoyar la función cardíaca durante la espiración (en términos de volumen sistólico) y podría descargar a músculos inspiratorios débiles en la fase inicial de la inspiración. Sin embargo, esta hipótesis está respaldada principalmente por modelos matemáticos y estudios experimentales en humanos sanos con pequeño tamaño muestral, lo que dificulta la traslación a pacientes con IC en la vida real. Además, se puede argumentar que esta hipótesis apoya más bien lo que ocurre al aplicar las terapias de PAP, donde se espera que tengan efectos similares en los volúmenes pulmonares, la mecánica cardíaca y las presiones intratorácicas<sup>27</sup>.

La optimización del tratamiento médico para la IC es uno de los pilares fundamentales en el tratamiento de la ACS en la práctica clínica. El tratamiento farmacológico, la resincronización cardíaca, el tratamiento valvular y coronario han demostrado que disminuyen los TRS, mejoran la función cardíaca, la calidad de vida y la mortalidad en la IC crónica<sup>28</sup>.

Con base en la fisiopatología, las intervenciones farmacológicas que podrían atenuar el *loop gain* deberían mejorar la ACS y RCS. Las estatinas, la acetazolamida (ACT) y la teofilina, incluyendo la oxigenoterapia, afectan a diferentes componentes de este circuito. El oxígeno y las estatinas disminuyen el *loop gain* químico, mientras que la ACT y la teofilina disminuyen la ganancia de la planta. Por tanto, es posible que su combinación sea más eficaz que cada uno por separado<sup>29</sup>.

La Academia Americana de Medicina del Sueño (AASM) recomienda el oxígeno nocturno (O2N) como tratamiento estándar para la apnea central relacionada con la IC<sup>28</sup>. Los estudios observacionales y los recientes ensayos clínicos aleatorios (ECA) que comparan O2N a bajo flujo con *sham* oxígeno han demostrado que la O2N atenúa la ACS y la RCS, aunque persiste cierto grado de episodios centrales residuales comparado con las terapias de PAP. Sin embargo, al eliminar la desaturación de O<sub>2</sub>, predictor de mortalidad, puede conferir un beneficio potencial en la supervivencia de paciente con IC y FEVlr. Si esta mejoría es real, lo más probable es que se deba a la atenuación del estado hiperadrenérgico, como lo hace la terapia con CPAP o servoventilación adaptativa (SVA) al reducir la hiperactividad simpática. En el estudio de Oldenburg y cols.<sup>23</sup>, de más de 900 pacientes con IC y FEVlr bien tratados y seguidos durante aproximadamente 10 años, el índice de desaturación de O<sub>2</sub> (IDO) y el tiempo por debajo del 90% (T90), y no el IAH, se encontraban entre las variables asociadas significativamente con la mortalidad, a mayor T90 mayor muerte prematura<sup>23</sup>. Hay que señalar que en este análisis del T90 se combinaron pacientes AOS ( $n = 156$ ) con ACS ( $n = 403$ ). Sin embargo, el hallazgo de episodios centrales, obstructivos y mixtos en una misma noche en los registros polisomnográficos nocturnos es lo habitual en este grupo de pacientes, de la misma forma que la hipoxia intermitente media la respuesta simpática en ambos tipos de apnea del sueño. En contraste, otro ECA<sup>39</sup> concluyó que la oxigenoterapia crónica domiciliaria (OCD) durante 15 h al día no redujo la gravedad de la enfermedad ni mejoró la calidad de vida a los 6 meses en personas con IC crónica. Sin embargo, estos pacientes eran normóxicos, no se realizó estudio del sueño previo, no se sabía si habían usado el O<sub>2</sub> de noche, el cumplimiento promedio del OCD fue de 5,4 h/día y solo un 11% de los pacientes informaron haberlo utilizado. A mencionar, que la toxicidad del oxígeno es independiente del órgano y de la presencia o ausencia de

insuficiencia orgánica, sobre todo con el alto flujo. La hiperoxia aumenta la resistencia vascular sistémica y altera la función ventricular. En los estudios se observan efectos adversos principalmente con oxígeno  $\geq 40\%$ . El recién iniciado estudio LOFT-HF, que evalúa el impacto de la terapia de O<sub>2</sub>N de bajo flujo en los ingresos hospitalarios y la mortalidad en pacientes con IC y ACS e incluye una titulación cuidadosa de la terapia de O<sub>2</sub>N con una tasa máxima de 4 l/min, probablemente proporcionará importante información clínica<sup>29</sup>.

Otro enfoque de tratamiento es prevenir la ACS mediante la estimulación del diafragma. Recientemente, aprobado por la FDA, se ha introducido como tratamiento prometedor la estimulación unilateral del nervio frénico. En un ensayo clínico<sup>30</sup> se observó una mejoría significativa en los índices polisomnográficos, la función ventricular izquierda, la somnolencia y la calidad de vida. También hubo una tendencia hacia un menor número de hospitalizaciones. El efecto secundario más común fue la incomodidad que se resolvió en todos los pacientes. La mortalidad fue muy escasa (2 pacientes) e igual en ambos grupos. Este tratamiento se podría implementar en centros expertos y en poblaciones seleccionadas, pero actualmente no hay evidencia sobre la mortalidad y eficacia a largo plazo<sup>6</sup>.

En cuanto al tratamiento con PAP, esta puede administrarse como CPAP, presión a dos niveles (BPAP) o SVA. La CPAP es el tratamiento recomendado de primera línea para la apnea central con un éxito en un 50% de los casos, ya que en muchas ocasiones coexisten la apnea central y la obstructiva en un mismo paciente. Además, la CPAP aumenta la presión intratorácica, disminuye el retorno venoso y el volumen sistólico del ventrículo derecho, disminuye el volumen sanguíneo pulmonar y la presión capilar pulmonar, reduce la poscarga del ventrículo izquierdo (VI), aumentando el volumen sistólico del VI y disminuye el tiempo de circulación, lo que estabiliza la retroalimentación negativa del sistema de control ventilatorio y mejora la respiración periódica. Finalmente, la CPAP aumenta la capacidad residual funcional que disminuye la ganancia de la planta, disminuyendo el *loop gain*. Probablemente, cuando se producen estos cambios hemodinámicos, la CPAP es bastante eficaz. De lo contrario, podrían ocurrir graves consecuencias adversas<sup>2,28,29</sup>. La falta de efecto de la CPAP sobre el objetivo principal en el estudio CANPAP y el exceso de mortalidad atribuido a la SVA en el estudio SERV-HF podría deberse a las consecuencias hemodinámicas adversas del aumento de la presión intratorácica en los participantes que no respondieron.

El estudio CANPAP<sup>31</sup>, en el que se evaluó la mortalidad o mejoría de la supervivencia sin trasplante cardíaco en paciente con IC y ACS tratados con CPAP, no encontró diferencias entre el grupo control y el tratado. Sin embargo, en el análisis *post hoc* de los resultados se demostró una mejora significativa en los pacientes donde la ACS se controlaba correctamente dejando un IAH residual  $< 15$  episodios centrales por hora. En el grupo de ACS resistente al tratamiento con CPAP aumentó la mortalidad<sup>32</sup>.

La BPAP es eficaz para restaurar la ventilación alveolar durante el sueño y está indicada en la ACS secundaria a hipoventilación. En los casos de IC con respiración periódica, la BPAP puede incluso agravar los episodios centrales al inducir hipocapnia y facilitar el cierre glótico, por lo que no se aconseja usar BPAP en IC con ACS y respiración periódica fuera de los ensayos clínicos<sup>28</sup>.

Los dispositivos de SVA están diseñados específicamente para tratar la ACS. A través del algoritmo incorporado miden continuamente la ventilación-minuto o el pico de flujo de aire y calculan un nivel objetivo de ventilación. Con la finalidad de contrarrestar la respuesta ventilatoria excesiva y la hipopnea o apnea central, aplican un soporte de presión inspiratoria variable y una frecuencia respiratoria de rescate. También pueden incorporar una EPAP fija o autotitulada para facilitar la permeabilidad de la VAS<sup>33</sup>. Sin embargo, en pacientes con ACS y FEV1r (< 45%), la SVA está actualmente contraindicada, ya que en el estudio SERVE-HF la SVA provocó un aumento de la mortalidad cardiovascular y por todas las causas<sup>26</sup>. Sin embargo, algunos aspectos del estudio SERVE-HF han sido cuestionados. Existen dudas sobre la metodología del estudio, ya que en los grupos tratados y de control se incluyeron pacientes a pesar de no cumplir los criterios de elegibilidad. Faltaban algunos datos esenciales como la función cardíaca derecha. El uso de fármacos antiarrítmicos no fue homogéneo entre los dos brazos, fue mayor en el grupo con SVA. El cumplimiento del tratamiento con SVA fue bajo. Además, se suspendió el algoritmo del dispositivo utilizado en el estudio y se dejó de fabricar desde entonces. Por otro lado, los análisis *post hoc* mostraron que el mayor riesgo de muerte cardiovascular con el SVA se limitó principalmente a pacientes con FEV1 ≤ 30%, con una mayor proporción de RCS y sin previa admisión hospitalaria<sup>34,35</sup>.

En los pacientes con FEV1p el tratamiento con SVA es beneficioso en términos de calidad de vida y reducción de hospitalizaciones y, por lo tanto, todavía se indica en este subgrupo, generalmente después de una prueba terapéutica con CPAP que demuestre un mal control de las apneas centrales<sup>15,36</sup>.

Un reciente metanálisis publicado en la revista Heart Lung en enero del 2021 respecto al impacto a largo plazo de la eficacia de la SVA para suprimir la ACS en paciente con IC, identificó a sujetos con características específicas que podrían beneficiarse de la terapia con SVA. Se seleccionaron 8 estudios (3 ECA) con un total de 2208 participantes. Al parecer, aunque la SVA no reduce los eventos CV ni la muerte por cualquier causa en pacientes con IC con FEV1 extremadamente baja, si se podrían beneficiar aquellos con un nadir de saturación nocturna ≤ 80% (valor medio) asociada a ACS o pacientes con IC menos severa (FEV1 >33% y NYHA I/II)<sup>37</sup>.

Otro metanálisis publicado en a finales del 2019 donde se evaluó los efectos de la terapia de presión positiva (PAP), tanto CPAP como SVA, en los pacientes con insuficiencia cardíaca y apnea central del sueño, señala que el efecto sobre la mortalidad fue incierto, pero si puede valer la pena considerar la terapia con PAP para las personas con IC para mejorar la calidad de vida<sup>38</sup>.

En resumen, según la evidencia actual, este DIC aconseja respecto al tratamiento de la ACS lo siguiente:

1. El primer paso es optimizar el tratamiento médico de la IC.
2. Los pacientes con IC y ACS con FEV1r sintomática pueden ser tratados con CPAP, como prueba terapéutica. Si la CPAP no suprime los episodios centrales residuales (IAH > 15 episodios centrales residuales), el tratamiento debe suspenderse.

3. No se aconseja el uso de auto-CPAP en este grupo de pacientes.
4. En pacientes que no responden a CPAP, la SVA podría ser una opción terapéutica.
5. Antes de comenzar el tratamiento con SVA se debe evaluar la función sistólica ( $FEVI \leq 45\%$ ) para ver si el paciente tiene contraindicado este tratamiento.
6. En pacientes no respondedores de CPAP-SVA, o con contraindicación de SVA, el  $O_2$  nocturno de bajo flujo, máximo 4 l/m, podría ser una opción terapéutica.
7. Se podrían usar BPAP-ST, ACT y teofilina en la IC con ACS normo/hipocápnica, solo si fallan las opciones previas, vigilando estrechamente al paciente.

## 6.2. Apnea central del sueño emergente tras tratamiento

La ACS puede aparecer en algunos pacientes con diagnóstico inicial de AOS tratados con CPAP. Las apneas centrales se desarrollan con el tiempo y pueden no desaparecer bajo el uso continuo de la CPAP. Este fenómeno se conoce como “ACS emergente”. Se ha llegado a considerar una entidad clínica específica, con una prevalencia entre un 3% y 20%, y lo más probable es que este fenómeno desenmascare la inestabilidad respiratoria subyacente de la AOS al existir mayor ganancia del sistema. Se han identificado factores de riesgo para desarrollarla como la edad avanzada, el sexo masculino, el IMC bajo, la IC, la cardiopatía isquémica y el accidente cerebrovascular. Existen también factores predisponentes como el uso de altas presiones de PAP, un IAH residual elevado, un índice de apnea central basal elevado, un índice de *arousal* basal elevado y la presencia de fugas<sup>39,40</sup>.

El ICSD-3 define la ACS emergente cuando existen:

- 1)  $\geq 5$  episodios/h de predominio obstructivo en el diagnóstico de PSG basal.
- 2) Resolución significativa de episodios obstructivos y aparición o persistencia de episodios centrales durante el tratamiento con PAP con un IAH central  $\geq 5$  episodios/h con un  $\geq 50\%$  de episodios centrales totales.
- 3) El fenómeno no debe explicarse mejor por otra causa.

Según su evolución en el tiempo se han identificado varios fenotipos clínicos diferentes de la ACS emergente. Esto se ha hecho más evidente tras el uso reciente de la telemonitorización de los equipos de PAP y el análisis de los grandes datos. Un subgrupo desarrolla una ACS transitoria después del inicio de CPAP con resolución espontánea tras 9-12 semanas de tratamiento, siendo un fenómeno agudo y transitorio. A esta entidad se denomina ACS emergente-transitoria. En otro grupo, los episodios centrales aparecen y persisten en el tiempo (verdadera ACS emergente al tratamiento con CPAP), donde la SVA es la mejor opción terapéutica<sup>39,40</sup>.

En otro grupo, los episodios centrales ya se observaban en la prueba inicial antes de inicio del tratamiento (aunque su diagnóstico era de AOS) y no es inducida por la CPAP. En este caso, los episodios centrales tampoco desaparecen con su uso continuo. En este grupo se superponen episodios obstructivos y centrales. En el diagnóstico se debería describir la combinación de AOS con cualquier fenotipo de trastornos centrales como “AOS y ACS coexistentes”. Son factores de riesgo las enfermedades cardiovasculares o el uso crónico de opioides<sup>15</sup>. En la tabla 3 se resumen las definiciones de ACS emergente.

**Tabla 3.** Apnea central del sueño emergente a tratamiento.

| <b>PSG basal</b>                         | <b>Diagnóstico</b> | <b>Tiempo: 9-12 semanas</b>                                                   | <b>Nuevo diagnóstico</b>  |
|------------------------------------------|--------------------|-------------------------------------------------------------------------------|---------------------------|
| IAH > 15/h<br>episodios<br>obstructivos  | AOS                | Aparecen episodios<br>centrales con un IAH<br>residual > 15                   | ACS emergente             |
| IAH > 15/h<br>episodios<br>obstructivos  | AOS                | Aparición de episodios<br>centrales, que se<br>resuelven a los 3<br>meses     | ACS transitoria           |
| Episodios<br>obstructivos y<br>centrales | AOS                | Titulación IAH<br>obstructivo correcta,<br>pero no Titulación IAH<br>central. | AOS y ACS<br>coexistentes |

ACS: apnea central del sueño; AOS: apnea obstructiva del sueño; IAH: índice de apnea-hipopnea; PSG: polisomnografía.

Para evitar un diagnóstico erróneo es de vital importancia identificar y tratar cualquier enfermedad subyacente. Su tratamiento óptimo puede reducir o eliminar los episodios centrales. Por esto no se debería utilizar el diagnóstico de ACS emergente en pacientes con enfermedades cardiovasculares, endocrinas, enfermedades renales o neurológicas descompensadas, y tampoco en la ACS preexistente antes del inicio de PAP y en los casos de ACS transitoria, que se resuelve con el tiempo.

En un reciente análisis de grandes datos, todos los pacientes que desarrollaron ACS emergente tenían mayor riesgo de interrumpir la terapia que aquellos que no la desarrollaron.

Por esto se recomienda la telemonitorización sistemática de todos los pacientes con AOS tratados con CPAP, especialmente en los primeros meses después del inicio de la CPAP. Esto podría facilitar una intervención temprana, como un cambio a una modalidad ventilatoria más eficiente para reducir el riesgo de interrupción de la terapia<sup>40</sup>.

La evidencia actual ha demostrado que la SVA mejora más eficazmente la ACS emergente en comparación con el oxígeno, CPAP y ventilación no invasiva (VNI)<sup>15</sup>.

Este DIC, según la evidencia actual, define ACS emergente cuando se cumplen los siguientes criterios:

1. El diagnóstico inicial es AOS con un IAH > 15 episodios obstructivos/h.
2. Tras un período de 9-12 semanas de tratamiento con CPAP se observa una resolución significativa de los episodios obstructivos y la aparición de episodios centrales con un IAH > 15 episodios/h, donde el 50% o más son centrales y persisten en el tiempo.

3. Este fenómeno no se explica por enfermedades subyacentes o factores de riesgo para desarrollar ACS.

Respecto al tratamiento, si la patología subyacente y los factores de riesgo están controlados, se puede cambiar la terapia de CPAP a SVA y mantenerlo en el tiempo en función de los síntomas, el impacto en las comorbilidades y el resultado terapéutico.

### **6.3. Apnea central del sueño inducida por gran altitud**

La hipoxia secundaria a la disminución de la presión parcial de oxígeno por la altura genera una hiperventilación secundaria y un patrón de respiración periódica (alta ganancia del sistema). Esta hiperventilación lleva al desarrollo de alcalosis hipocápnica. La diferencia entre que unos individuos muestren este patrón y otros no, a la misma altura, se explica por las diferencias en la sensibilidad de los quimiorreceptores que controlan la ventilación y está impulsada por múltiples factores genéticos. Tener un umbral de hipoxia más sensible a menores cambios facilita su desarrollo<sup>41</sup>. Los datos disponibles sugieren que la ACS por altitud puede ocurrir en sujetos sanos a altitudes de más de 1.600 m y se asocia con trastornos del sueño. Con el aumento de la altitud, aumenta la gravedad de la ACS y el porcentaje de personas afectadas. La aclimatación se ha asociado con la persistencia o incluso un aumento adicional en su gravedad.

La evidencia sugiere que el aire enriquecido con oxígeno o la ACT reducen la ACS asociado a altitud y mejora la saturación nocturna de oxígeno en personas sanas cuando ascienden a grandes latitudes. El tratamiento combinado con ACT y CPAP podría ser un tratamiento apropiado en este contexto, ya que previene las apneas centrales y mejora la saturación de oxígeno nocturno<sup>15</sup>.

### **6.4. Apnea central del sueño idiopática**

Cuando la apnea central ocurre sin factor de riesgo aparente se define como “apnea central idiopática”. Se desconoce la prevalencia general, sin embargo, en unidades de sueño, se ha informado una prevalencia del 4% al 7% en pacientes mayores. Se observa mayor quimiosensibilidad e inestabilidad en el sueño. Sin embargo, es posible que estos pacientes tengan enfermedad cardiovascular, cerebrovascular o metabólica oculta.

Se comporta como una ACS hipocápnica, con o sin patrón de respiración periódica y con múltiples microdespertares. Se aconseja, como primera medida, una búsqueda sistemática de patología cardio o cerebrovascular y el tratamiento de la patología subyacente. Controlar los niveles de PaCO<sub>2</sub>, así como reducir el índice microdespertares, han resultado ser medidas eficaces para controlar esta afección, por lo que los expertos realizan una prueba terapéutica con zolpidem o ACT solo en pacientes sintomáticos y bajo estrecha supervisión médica. También se podría considerar una prueba terapéutica con CPAP o con SVA de forma individualizada<sup>4,15</sup>.

### **6.5. Otros trastornos médicos asociados a la apnea central del sueño**

La ACS es común en varias afecciones médicas que presentan una hiperventilación crónica y una normo o hipocapnia diurna como la hipertensión pulmonar idiopática o tromboembólica crónica. La prevalencia de la ACS aumenta hasta en un 10% en pacientes con enfermedad renal crónica (ERC). En pacientes con acromegalia, la ACS está relacionada a la hipersecreción de la hormona del crecimiento. Los expertos según

la evidencia actual tratan la ACS clínicamente sintomática en acromegalia y en la insuficiencia renal en estadios avanzados con CPAP o SVA<sup>15,28</sup>.

### **6.6. Enfermedades neurológicas y apnea central del sueño**

Los TRS son frecuentes después de un accidente cerebrovascular (ACV), con una prevalencia que oscila entre el 30% y un 70%. La AOS se considera un factor de riesgo para desarrollar un ictus y es el TRS más frecuente tras ocurrir este. El tratamiento con CPAP es actualmente la mejor opción terapéutica, pero tolerada por una minoría de pacientes.

La ACS ocurre principalmente como secuela de un ACV extenso, siendo más frecuente en la fase aguda, para luego disminuir entre los 3 y 6 meses<sup>15</sup>. Recientemente se ha descrito el ictus como un predictor de la ACS, en particular al del tronco encefálico. La influencia de la ACS en la evolución pronóstica de un ictus sigue siendo controvertida<sup>6,42</sup>.

La ACS puede ser normo o hipercápnic. Las diferentes localizaciones del ACV generan inestabilidad ventilatoria (ACS normocápnic) o disminución del impulso ventilatorio durante el sueño (ACS hipercápnic). En el caso de presentar normocapnia con inestabilidad ventilatoria, el SVA es el soporte ventilatorio apropiado. En pacientes con hipercapnia y/o hipoventilación en sueño REM, se requiere VNI.

La ACS también se puede observar en lesiones estructurales, tumorales o infecciones del sistema nervioso central donde la RM orientaría al diagnóstico y a su tratamiento<sup>3</sup>, o en enfermedades neurodegenerativas como la enfermedad de Parkinson y la enfermedad de Alzheimer, aunque de estas últimas hay muy pocos estudios y los datos son insuficientes para sacar conclusiones.

La ACS puede ocurrir en varias enfermedades neuromusculares (ENM) (v. consenso VNI). Existe una interacción compleja entre las características fisiopatológicas de las ENM y la fisiología del sueño (sueño no-REM, volumen pulmonar reducido en decúbito supino) que favorece la aparición de los TRS. Las ENM pueden provocar hipoventilación como consecuencia de insuficiencia y/o disfunción de los músculos respiratorios. Se observan varios patrones de ACS, que incluyen RCS y respiración atáxica. El patrón de ACS con respiración periódica o irregular es muy prevalente en la atrofia multisistémica y puede ser la manifestación primaria de la enfermedad. También se observa en afecciones como la esclerosis lateral amiotrófica y la esclerosis múltiple. La VNI es necesaria para reemplazar la actividad de los centros respiratorios y apoyar la debilidad muscular. Tiene efectos beneficiosos, ya que mejora la calidad de vida y la supervivencia de los pacientes. Sin embargo, en algunas situaciones la VNI debe utilizarse con precaución, como en presencia de una miocardiopatía concomitante. Son obligatorios un diagnóstico preciso del trastorno respiratorio relacionado con el sueño y una evaluación detallada de la ENM subyacente (v. detalle en consenso VNI).

### **6.7. Apnea central del sueño inducida por fármacos**

Existen medicamentos que alteran la ventilación y generan una inestabilidad respiratoria. El oxibato sódico utilizado en la narcolepsia puede inducir la aparición de apneas centrales, mientras que la ACT y los hipnóticos como el zolpidem y el triazolam pueden atenuar este trastorno.

Los opiáceos son conocidos depresores respiratorios del sistema nervioso central. Se estima una prevalencia de TRS asociados a opioides de un 42-85% y específicamente de ACS, un 24%. Los dos grupos principales de pacientes expuestos son los que reciben tratamiento para el dolor crónico y para la adicción en los programas de metadona. Las alteraciones respiratorias de los opiáceos se deben principalmente a la activación de los subtipos de receptores  $\mu$  y  $\delta$  e involucran neuronas respiratorias específicas en la médula ventrolateral. El efecto de los opioides en la ACS es dosis-dependiente, de modo que el patrón respiratorio irregular puede normalizarse con dosis reducidas. Además, el patrón respiratorio puede verse agravado por el uso concomitante de antidepresivos y benzodiazepina<sup>43,44</sup>.

El baclofeno, un agonista del receptor GABA tipo B de acción central, se ha asociado recientemente con la ACS, especialmente las dosis altas prescritas para la adicción al alcohol<sup>45</sup>.

En contraste, existen otras drogas que pueden aumentar la actividad de los centros respiratorios y producir ACS. Este es el caso del antiplaquetario ticagrelor, antagonista del receptor P2Y, utilizado actualmente como terapia de primera línea después de un síndrome coronario agudo<sup>46</sup>.

Este patrón de respiración tiene varias características importantes:

1. Puede presentar bradipnea asociada a hipoventilación, hipercapnia e hipoxemia.
2. La respiración es irregular, descrita como “atáxica”, provocada por una quimiosensibilidad disminuida del centro respiratorio con una respuesta ventilatoria atenuada.
3. La ACS a menudo presenta un patrón periódico similar a la ACS por altitud, con un ciclo que dura unos 30-40 s, apneas de corta duración, lo que sugiere una elevada ganancia del sistema<sup>44,47</sup>.

Desde el punto de vista terapéutico, la intervención de primera línea debe ser la reducción o abstinencia del medicamento. Si esto no es posible, el tratamiento dependerá del tipo de TRS, las alteraciones gasométricas y/o control ventilatorio. La ACS con normocapnia e inestabilidad ventilatoria a la SVA es el soporte ventilatorio apropiado. En casos de hipercapnia y/o hipoventilación en sueño REM se requerirá VNI<sup>6</sup>. La mayoría de los datos clínicos hasta la fecha sugieren que tanto la SVA como la BPAP son superiores a la CPAP para la eliminación de la ACS asociado a opioides<sup>15</sup>.

En la **figura 3** se resume el algoritmo diagnóstico/terapéutico propuesto por este DIC para el manejo de la ACS.

**Figura 3.** Algoritmo diagnóstico terapéutico de la apnea central del sueño (ACS) propuesto por este DIC.

**Recuadro amarillo:** ante un diagnóstico de ACS es importante la identificación de las posibles causas y mecanismos subyacentes, donde el primer paso es optimizar el tratamiento de la o las enfermedades de base. \*RM: solo si hay sospecha de patología neurológica (p. ej., cirugía para descompresión de la malformación de Chiari o tratamiento quirúrgico de la acromegalia. Se aconseja una gasometría arterial basal (GAB) para conocer si es una CSA hipercápica o normocápica (respuesta ventilatoria) y mejorar el abordaje terapéutico. Si en la ecografía cardíaca se presenta una fracción de eyección del ventrículo izquierdo disminuido, actualmente la servoventilación adaptativa (SVA) está contraindicada. **Recuadro rojo:** ante una ACS, tras optimizar la patología de base (\*\*en el caso de los opioides, el primer paso es suspender o disminuir dosis), el primer enfoque terapéutico es con presión positiva continua en la vía aérea (CPAP). Si con CPAP el IAHC residual es mayor de 15 hay que buscar tratamientos alternativos que dependerán de la hipercapnia o eucapnia diurna y de la fracción de eyección del ventrículo izquierdo (FEVI). ENM\*\*: en este caso se trata con VNI (v. consenso VNI).

ACT: acetazolamida; ENM: enfermedad neuromuscular; IAHC: índice de apnea hipopnea central; IC: insuficiencia cardíaca; IR: insuficiencia renal; O2N: oxígeno nocturno; PR: poligrafía respiratoria; PSG: polisomnografía; RM: resonancia magnética; VNI: ventilación no invasiva.

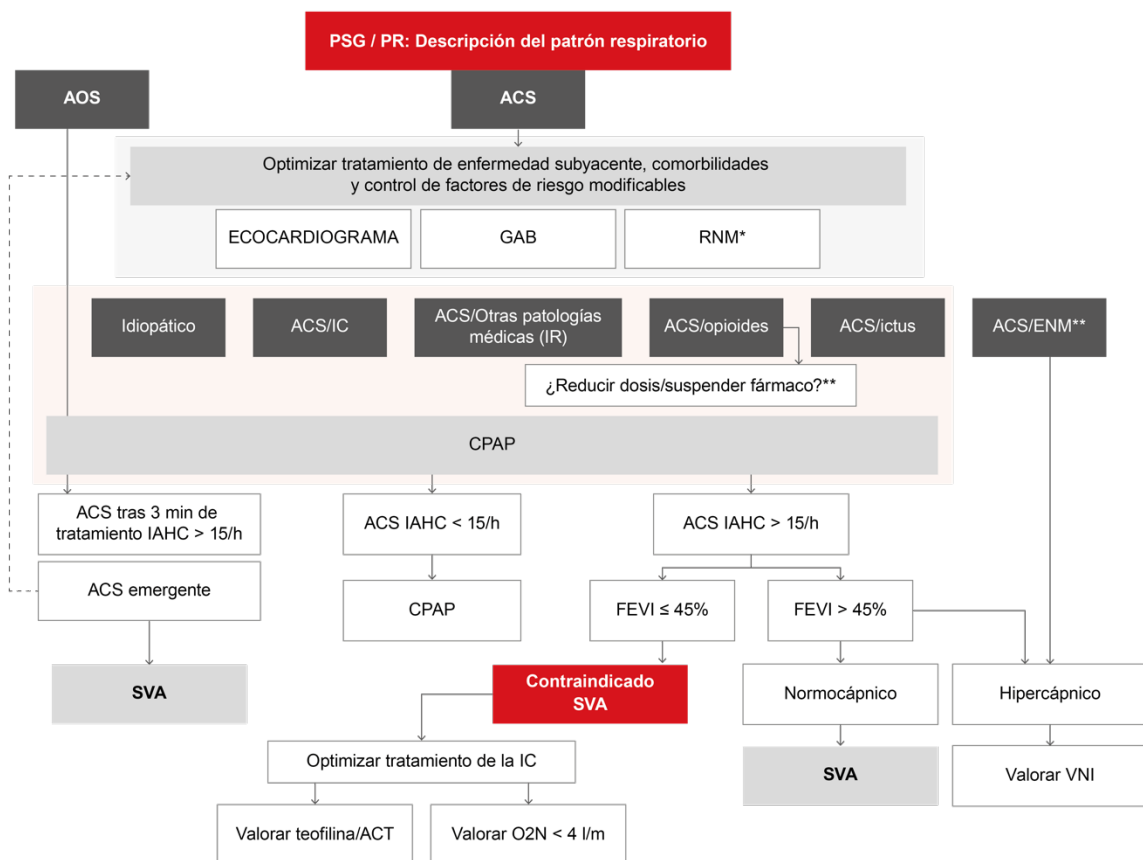

## BIBLIOGRAFÍA:

1. Javaheri S, Dempsey JA. Central sleep apnea. *Compr Physiol* 2013;3(1):141-63.
2. Randerath W, Verbraecken J, Andreas S, Arzt M, Bloch KE, Brack T, et al. Definition, discrimination, diagnosis and treatment of central breathing disturbances during sleep. *Eur Respir J* 2017;49:1600959.
3. Badr MS, Javaheri S. Central Sleep Apnea: a Brief Review. *Curr Pulmonol Rep* 2019;8:14. Doi: 10.1007/s13665-019-0221-z.
4. Orr J, Malhotra A, Sands SA. Pathogenesis of central and complex sleep apnoea. *Respirology* 2017;22(1):43-52. doi: 10.1111/resp.12927.
5. Berry RB, Budhiraja R, Gottlieb DJ, Gozal D, Iber C, Kapur VK, et al. Rules for scoring respiratory events in sleep: update of the 2007 AASM manual for the scoring of sleep and associated events. Deliberations of the Sleep Apnea Definitions Task Force of the American Academy of Sleep Medicine. *J Clin Sleep Med* 2012;8:597-619.
6. Baillieul S, Revol B, Jullian-Desayes I, Joyeux-Faure M, Tamisier R, Pépin JL. Diagnosis and management of central sleep apnea syndrome. *Expert Review of Respiratory Medicine* 2019;13(6):545-57. doi: 10.1080/17476348.2019.1604226.
7. Randerath WJ, Trembl M, Priegnitz C, Stieglitz S, Hagmeyer L, Morgenstern C. Evaluation of a noninvasive algorithm for differentiation of obstructive and central hypopneas. *Sleep* 2013;36:363-8.
8. American Academy of Sleep Medicine Task F. *International Classification of Sleep Disorders*. 3rd ed. Darien; 2014.
9. Eckert DJ, Jordan AS, Merchia P, Malhotra A. Central sleep apnea: pathophysiology and treatment. *Chest* 2007;131:595-607.
10. Martins RT, Eckert DJ. Central sleep apnea due to other medical disorders. *Sleep Med Clin* 2014;9:57-67.
11. Hernandez AB, Patil SP. Pathophysiology of central sleep apneas. *Sleep Breath* 2016;20:467-82.
12. Naughton MT. Loop gain in apnea: gaining control or controlling the gain? *Am J Respir Crit Care Med* 2010;181:103-5.
13. Dempsey JA. Crossing the apnoeic threshold: causes and consequences. *Exp Physiol* 2005;90:13-24.
14. Dernaika T, Tawak M, Nazir S, Younis W, Kinasevitz GT. The significance and outcome of continuous positive airway pressure-related central sleep apnea during split-night sleep studies. *Chest* 2007;132:81-7.
15. Randerath W. Central sleep apnea: the problem of diagnosis. *Sleep Med* 2017;34:224-5.
16. Javaheri S, Barbe F, Campos-Rodríguez F, Dempsey JA, Khayat R, Javaheri S, et al. Sleep apnea: types, mechanisms, and clinical cardiovascular consequences. *J Am Coll Cardiol* 2017;69:841-58.
17. Arzt M, Woehrle H, Oldenburg O, Graml A, Suling A, Erdmann E, et al. Prevalence and predictors of sleep-disordered breathing in patients with stable chronic heart failure: the SchlaHF registry. *JACC Heart Fail* 2016;4:116-25.
18. Khayat R, Jarjoura D, Porter K, Sow A, Wannemacher J, Dohar R, et al. Sleep disordered breathing and post-discharge mortality in patients with acute heart failure. *Eur Heart J* 2015;36:1463-9.

19. Tremel F, Pepin JL, Veale D, Wuyam B, Siché JP, Mallion JM, et al. High prevalence and persistence of sleep apnoea in patients referred for acute left ventricular failure and medically treated over 2 months. *Eur Heart J* 1999;20:1201-9.
20. Naughton MT, Kee K. Sleep apnoea in heart failure: to treat or not to treat? *Respirology* 2017;22:217-29.
21. Bitter T, Westerheide N, Prinz C, Hossain MS, Vogt J, Langer C, et al. Cheyne-Stokes respiration and obstructive sleep apnoea are independent risk factors for malignant ventricular arrhythmias requiring appropriate cardioverter-defibrillator therapies in patients with congestive heart failure. *Eur Heart J* 2011;32:61-74.
22. Kreuz J, Skowasch D, Horlbeck F, Atzinger C, Schrickel JW, Lorenzen H, et al. Usefulness of sleep-disordered breathing to predict occurrence of appropriate and inappropriate implantable-cardioverter defibrillator therapy in patients with implantable cardioverter-defibrillator for primary prevention of sudden cardiac death. *Am J Cardiol* 2013;111:1319-23.
23. Oldenburg O, Wellmann B, Buchholz A, Bitter T, Fox H, Thiem U, et al. Nocturnal hypoxaemia is associated with increased mortality in stable heart failure patients. *Eur Heart J* 2016;37:1695-703.
24. Lanfranchi PA, Somers VK, Braghiroli A, Corra U, Eleuteri E, Giannuzzi P. Central sleep apnea in left ventricular dysfunction: prevalence and implications for arrhythmic risk. *Circulation* 2003;107:727-32.
25. Javaheri S, Blackwell T, Ancoli-Israel S, Ensrud KE, Stone KL, Redline S; Osteoporotic Fractures in Men Study Research Group. Sleep-disordered breathing and incident heart failure in older men. *Am J Respir Crit Care Med* 2016;193:561-8.
26. Cowie MR, Woehrle H, Wegscheider K, Angermann C, d'Ortho MP, Erdmann E, et al. Adaptive servo-ventilation for central sleep apnea in systolic heart failure. *N Engl J Med* 2015;373:1095-105.
27. Perger E, Inami T, Lyons OD, Alshaer H, Smith S, Floras JS, et al. Distinct patterns of hyperpnea during Cheyne-Stokes respiration: implication for cardiac function in patients with heart failure. *J Clin Sleep Med* 2017;13:1235-41.
28. Aurora RN, Chowdhuri S, Ramar K, Bista SR, Casey KR, Lamm CI, et al. The treatment of central sleep apnea syndromes in adults: practice parameters with an evidence-based literature review and meta-analyses. *Sleep* 2012;35(1):17-40. doi: 10.5665/sleep.1580.
29. Javaheri S, Brown LK, Khayat RN, Update on Apneas of Heart Failure with Reduced Ejection Fraction: Emphasis on the Physiology of Treatment Part 2: Central Sleep Apnea CHEST (2020). doi: 10.1016/j.chest.2019.12.020.
30. Bordier P, Lataste A, Hofmann P, Robert F, Bourenane G. Nocturnal oxygen therapy in patients with chronic heart failure and sleep apnea: a systematic review. *Sleep Med* 2016;17:149-57.
31. Bradley TD, Logan AG, Kimoff RJ, Sériès F, Morrison D, Ferguson K, et al. Continuous positive airway pressure for central sleep apnea and heart failure. *N Engl J Med* 2005;353(19):2025-33.
32. Arzt M, Floras JS, Logan AG, Kimoff RJ, Series F, Morrison D, et al. Suppression of central sleep apnea by continuous positive airway pressure and

- transplant-free survival in heart failure: a post hoc analysis of the CANPAP Trial. *Circulation* 2007;115:3173-80.
33. Javaheri S, Brown LK, Randerath WJ. Positive airway pressure therapy with adaptive servoventilation: part 1: operational algorithms. *Chest* 2014;146:514-23.
34. Javaheri S, Brown L, Randerath W, Khayat R. SERVE-HF: more questions than answers. *Chest* 2016;149:900-4.
35. Eulenburg C, Wegscheider K, Woehrle H, Angermann C, d'Ortho MP, Erdmann E, et al. Mechanisms underlying increased mortality risk in patients with heart failure and reduced ejection fraction randomly assigned to adaptive servoventilation in the SERVE-HF study: results of a secondary multistate modelling analysis. *Lancet Respir Med* 2016;4:873-81.
36. O'Connor CM, Whellan DJ, Fiuzat M, Punjabi NM, Tasissa G, Anstrom KJ, et al. Cardiovascular outcomes with minute ventilation-targeted adaptive servoventilation therapy in heart failure: the CAT-HF trial. *J Am Coll Cardiol* 2017;69:1577-87.
37. Wang J, Covassin N, Dai T, Fan Z, Yisilamu P, Sun D, Li F, Xie J. Therapeutic value of treating central sleep apnea by adaptive servo-ventilation in patients with heart failure: A systematic review and meta-analysis. *Heart Lung*. 2021 Jan 29;50(2):344-351. doi: 10.1016/j.hrtlng.2021.01.012.
38. Yamamoto S, Yamaga T, Nishie K, Nagata C, Mori R. Positive airway pressure therapy for the treatment of central sleep apnoea associated with heart failure. *Cochrane Database Syst Rev*. 2019 Dec 4;12(12):CD012803. doi:10.1002/14651858.CD012803.pub2.
39. Nigam G, Pathak C, Riaz M. A systematic review on prevalence and risk factors associated with treatment-emergent central sleep apnea. *Ann Thorac Med* 2016;11:202-10.
40. Liu D, Armitstead J, Benjafield A, Shao S, Malhotra A, Cistulli PA, et al. Trajectories of emergent central sleep apnea during CPAP therapy. *Chest* 2017;152:751-60.
41. Burgess KR, Ainslie PN. Central sleep apnea at high altitude. *Adv Exp Med Biol* 2016;903:275-83.
42. Dong R, Dong Z, Liu H, Shi F, Du J. Prevalence, risk factors, outcomes, and treatment of obstructive sleep apnea in patients with cerebrovascular disease: a systematic review. *J Stroke Cerebrovasc Dis* 2018;27:1471-80.
43. Wang D, Teichtahl H, Drummer O, Goodman C, Cherry G, Cunningham D, et al. Central sleep apnea in stable methadone maintenance treatment patients. *Chest* 2005;128:1348-56.
44. Walker JM, Farney RJ, Rhondeau SM, Boyle KM, Valentine K, Cloward TV, et al. Chronic opioid use is a risk factor for the development of central sleep apnea and ataxic breathing. *J Clin Sleep Med* 2007;3:455-61.
45. Revol B, Jullian-Desayes I, Bailly S, Mallaret M, Tami  ier R, Agier MS, et al. Baclofen and sleep apnoea syndrome: analysis of VigiBase, the WHO pharmacovigilance database. *Eur Respir J* 2018;51:1701855.
46. Revol B, Jullian-Desayes I, Tami  ier R, Puel V, Mallaret M, Joyeux-Faure M, et al. Ticagrelor and central sleep apnea. *J Am Coll Cardiol* 2018;71:2378-9.

47. Jungquist CR, Flannery M, Perlis ML, Grace JT. Relationship of chronic pain and opioid use with respiratory disturbance during sleep. *Pain Manag Nurs* 2012;13:70-9.
