# Supplementary material
Source: Elsevier journal article supplement (https://www.sciencedirect.com/science/article/pii/S0300289621004099)
Supplement: mmc12 [file S0300289621004099:mmc12.pdf]

## 2.7 El proceso anestésico en el paciente con trastornos respiratorios del sueño

**Editora:** Olga Mediano. Unidad de Sueño, Departamento de Neumología, Hospital Universitario de Guadalajara, Guadalajara, España; Departamento de Medicina, Universidad de Alcalá, Alcalá de Henares, Madrid, España. Centro de Investigación Biomédica en Red de Enfermedades Respiratorias (CIBERES), Madrid, España.

**Pilar Resano Barrio.** Unidad del Sueño. Sección de Neumología. Hospital Universitario de Guadalajara.

**Erica Olea de la Fuente.** FEA. Servicio de Anestesiología y Reanimación. Hospital Universitario Álava. Vitoria.

### Introducción

Aunque no existen grandes estudios epidemiológicos sobre la prevalencia de la Apnea Obstructiva del Sueño (AOS) en la población quirúrgica adulta, se estima que se sitúa en torno al 10-20% (a excepción de la cirugía de la vía aérea), y más del 70% de los pacientes está sin diagnóstico en el momento de la cirugía<sup>1</sup>. En el caso de la cirugía bariátrica la prevalencia de AOS supera el 70%, siendo mayor conforme aumenta el índice de masa corporal (IMC), con una prevalencia en torno al 95% en pacientes con IMC superior a 60 kg/m<sup>2</sup> <sup>2</sup>. El paciente con AOS supone un gran reto en el ámbito quirúrgico debido a su asociación con un mayor riesgo de complicaciones perioperatorias, fundamentalmente pulmonares<sup>3</sup>, y es especialmente vulnerable durante los procesos de anestesia, sedación y analgesia. En ausencia de ensayos clínicos aleatorizados, a fecha de hoy existen revisiones sistemáticas que incluyen miles de pacientes y dos metaanálisis con 13 y 17 estudios, respectivamente, que demuestran que los pacientes con AOS tienen un mayor riesgo de presentar complicaciones en el período perioperatorio<sup>4,5</sup>.

### Fisiopatología

Existen numerosas variables que influyen en los trastornos respiratorios durante el sueño en el período perioperatorio, como la propia sedación anestésica y medicación para el dolor que agrava la AOS, la afectación de la vía aérea superior (VAS) tras la intubación, la propia anatomía de los pacientes con AOS, la fragmentación del sueño durante el postoperatorio, la administración de líquidos e incluso la propia administración de oxígeno. Por otra parte, la frecuente asociación de la AOS con múltiples comorbilidades como hipertensión arterial, hipertensión pulmonar, enfermedad coronaria, arritmias, resistencia a la insulina o enfermedad cerebrovascular, dificulta el manejo de estos pacientes en el período postoperatorio debido a las potenciales complicaciones.

Múltiples estudios han demostrado que la AOS se desencadena o se agrava bajo los efectos de la sedación, ya que los agentes anestésicos, sedantes y analgésicos

utilizados disminuyen la actividad de los músculos dilatadores de la faringe de una forma dosis-dependiente, con lo que desciende el tono faríngeo y favorece el colapso de la VAS o causa empeoramiento de la apnea. Los anestésicos también alteran la respuesta al despertar, que es considerada un mecanismo protector que ayuda a superar la obstrucción de la vía aérea y que protege al paciente con AOS de la obstrucción peligrosa. Los fármacos utilizados en anestesia, además de la depresión del tono del músculo esquelético, incrementan la reducción de la actividad fásica de los músculos intercostales y accesorios, haciendo que la actividad sea aún más dependiente del diafragma, con lo que el desequilibrio en favor de las presiones negativas sobre la VAS es mayor. Por otro lado, los anestésicos, hipnóticos, benzodiazepinas y opioides utilizados pueden causar depresión respiratoria y, por lo tanto, disminuir la ventilación por minuto. En el caso concreto de los opioides, disminuyen la sensibilidad de los quimiorreceptores periféricos y centrales al CO<sub>2</sub>, afectando por tanto de forma directa a la ventilación. El colapso de la VAS puede además verse influenciado por otras variables como la posición corporal (existe mayor riesgo de colapso en decúbito supino que en sedestación o en posición lateral), la presencia de deformidades craneofaciales (retrognatia, macroglosia, hipertrofia de tejidos blandos, etc.), así como la sobrecarga o redistribución de líquidos durante la anestesia. Asimismo, los pacientes quirúrgicos tienen un sueño muy fragmentado en las primeras dos noches postoperatorias, mostrando una reducción significativa del sueño REM (secundario al estrés quirúrgico, al dolor y al uso de anestésicos) seguida de un gran incremento en cantidad y densidad del sueño REM entre el tercer y quinto días postoperatorios (rebote de sueño REM). Los trastornos respiratorios durante el sueño y la hipoxemia empeoran durante la fase REM debido a la hipotonía y a la inestabilidad de la respiración en esta etapa. Gran parte de las complicaciones posquirúrgicas (episodios de hipoxemia, arritmias, infarto agudo de miocardio, delirio, agitación psicomotora) ocurren durante la primera semana postoperatoria, especialmente entre los días 2 y 5, lo que coincide con el rebote REM. De forma complementaria, contribuyen al empeoramiento de la AOS durante el período perioperatorio una diversidad de factores quirúrgicos. La cirugía de tórax y abdomen alto, por ejemplo, compromete la función ventilatoria. La cirugía de VAS comporta riesgo de precipitar o empeorar la obstrucción, y esto mismo sucede en aquellos casos que precisan taponamiento nasal o que requieren sonda nasogástrica (SNG), ya que al reducir la luz nasal se promueve mayor esfuerzo inspiratorio y, por tanto, mayor posibilidad de colapso. También la cirugía de la VAS hace más compleja la utilización posterior de presión positiva continua en las vías respiratorias (CPAP). La presencia del anestesta y la monitorización durante la anestesia protege al paciente de estos efectos.

### **Evidencias sobre AOS como un factor de riesgo para complicaciones perioperatorias**

El riesgo perioperatorio de los pacientes con AOS ha sido subestimado con frecuencia por cirujanos y anestestistas (Tabla 1). Como ya se ha comentado, existen estudios de evidencia de calidad moderada, la mayoría procedentes de estudios de cohortes, que

sugieren que los pacientes con AOS tienen dos o tres veces mayor riesgo de presentar complicaciones cardiopulmonares tras la cirugía<sup>4,5</sup>. El riesgo absoluto varía entre los diferentes estudios debido en gran parte a la variabilidad en la definición de AOS. Las complicaciones pulmonares juegan un papel muy importante, y en este sentido el estudio de Gupta y col., 2001<sup>6</sup>, fue uno de los primeros en demostrar la presencia de complicaciones postoperatorias cardiopulmonares en pacientes con AOS en cirugía no cardiológica. Desde entonces el fallo respiratorio se ha vinculado con el AOS en numerosos estudios. Kaw y cols., 2012<sup>4</sup>, en un metaanálisis, revisan 13 estudios con 3.942 pacientes, encontrando 2,5 veces más riesgo de fallo respiratorio agudo, 2 veces mayor riesgo de episodios cardíacos postoperatorios y 2,8 veces más riesgo de traslado a la unidad de cuidados intensivos (UCI) en pacientes con AOS frente a los controles sin AOS. En otro metaanálisis<sup>7</sup>, diferentes autores evalúan 17 estudios con 7.162 pacientes y encuentran que los pacientes con AOS tienen 2,5 veces más riesgo de fallo respiratorio, 1,5 veces más riesgo de complicaciones cardíacas y 2,5 veces más riesgo de traslado a UCI que los pacientes sin AOS. No menos importante es la presencia de episodios cardíacos en el postoperatorio, teniendo en cuenta además la asociación existente entre la AOS y la enfermedad cardíaca<sup>8</sup>. El edema agudo de pulmón es una causa frecuente de fallo respiratorio postoperatorio en estos pacientes, y la aparición de fibrilación auricular postoperatoria es habitual en la cirugía cardiorrástica, incluso hasta 30 días después de la intervención, siendo mayor su prevalencia en pacientes con AOS<sup>9</sup>. Además, la presencia de AOS ha demostrado ser un fuerte predictor de fibrilación auricular de nueva aparición tras la cirugía coronaria, lo cual a su vez condujo a una mayor estancia hospitalaria<sup>10</sup>. No obstante, hay que tener en cuenta que la presencia de comorbilidades de estos pacientes, tales como la obesidad, diabetes, dislipidemia, enfermedad coronaria y edad avanzada, puede actuar como factor de confusión. En los pacientes con AOS también están descritas complicaciones neurológicas posquirúrgicas, como la presencia de delirio. La asociación entre AOS y mortalidad intrahospitalaria varía entre los diferentes estudios. Algunos de ellos no encuentran mayor impacto entre AOS y mortalidad, incluso algunos sugieren una disminución en la misma y tan solo un estudio encuentra un aumento de la misma<sup>11</sup>. De hecho, en este último estudio, de carácter retrospectivo, se investiga la asociación entre AOS y morbilidad posquirúrgica, mortalidad y costes en pacientes sometidos a artroplastia de cadera o rodilla. Demuestran una asociación entre AOS y aparición de embolia de pulmón postoperatoria, aumento de mortalidad intrahospitalaria y costes. A pesar de estos hallazgos, hay que ser cautos en su interpretación, ya que se trata de un estudio retrospectivo y que no existen datos en cuanto al tipo de anestesia empleada, la presencia de comorbilidades ni metodología empleada para establecer el diagnóstico de AOS.

**Tabla 1.** Riesgo perioperatorio de los pacientes con AOS

| <b>Autor /año</b> | <b>Tipo de estudio</b> | <b>Tipo de cirugía</b>           | <b>Complicación</b>                                                                                                                                                               | <b>Riesgo/asociación</b>                                                                                                                       | <b>OR (IC del 95%)</b>                                                      |
|-------------------|------------------------|----------------------------------|-----------------------------------------------------------------------------------------------------------------------------------------------------------------------------------|------------------------------------------------------------------------------------------------------------------------------------------------|-----------------------------------------------------------------------------|
| Kaw, 2012         | Metaanálisis           | Cirugía no cardíaca              | - Complicaciones cardiovasculares<br>- Fallo respiratorio agudo                                                                                                                   | 3,76% pacientes con AOS vs 1,69% pacientes sin AOS<br>1,96% pacientes con AOS vs 0,70% pacientes sin AOS                                       | 2,07 (1,23-3,50)<br>2,43 (1,34-4,39)                                        |
| Mokhlesi, 2013    | Estudio prospectivo    | Cirugía electiva                 | Fibrilación auricular en pacientes con AOS y diferentes procedimientos:<br>- Cirugía ortopédica<br>- Cirugía prostática<br>- Cirugía abdominal<br>- Cirugía cardiovascular        | La AOS se asocia de forma independiente con mayor riesgo de desarrollar fibrilación auricular en las cuatro categorías de cirugía              | 1,55 (1,49-1,62)<br>2,17 (1,82-2,58)<br>1,6 (1,35-1,81)<br>1,12 (1,05-1,20) |
| Mokhlesi, 2013    | Estudio prospectivo    | Cirugía electiva                 | Complicaciones respiratorias en pacientes con AOS y diferentes procedimientos:<br>- Cirugía ortopédica<br>- Cirugía prostática<br>- Cirugía abdominal<br>- Cirugía cardiovascular | La AOS se asocia de forma independiente con mayor riesgo de fracaso respiratorio en las cuatro categorías de cirugía                           | 3,2 (2,9-3,5)<br>2,51 (1,75-3,62)<br>1,13 (0,94-1,37) 1,30 (1,20-1,40)      |
| Hai, 2014         | Metaanálisis           | Cirugía no cardíaca              | Fracaso respiratorio<br>Complicaciones cardíacas postoperatorias<br>Riesgo de ingresar en la UCI                                                                                  | La AOS se asocia con mayor riesgo de fracaso respiratorio, complicaciones cardíacas y necesidad de ingreso en la UCI frente a pacientes no AOS | 2,42 (1,53-3,84)<br>1,63 (1,16-2,29)<br>2,46 (1,29-4,68)                    |
| Van Oosten, 2014  | Prospectivo            | Cirugía coronaria                | Fibrilación auricular                                                                                                                                                             | La AOS es un factor predictor de FA tras cirugía coronaria en pacientes con AOS                                                                | 2,18 (1,30-3,65)                                                            |
| D'Apuzzo, 2012    | Retrospectivo          | Artroplastia de cadera o rodilla | Mortalidad                                                                                                                                                                        | Existe una asociación entre AOS y aumento de mortalidad intrahospitalaria en pacientes con AOS                                                 | 1,9 (1,3-2,8)                                                               |

FA: fibrilación auricular; IC: intervalo de confianza; OR: *odds ratio*; AOS: Apnea Obstructiva del sueño.

Teniendo en cuenta las complicaciones asociadas a la anestesia en los pacientes con AOS, es muy importante identificar a los pacientes de riesgo antes de que reciban la anestesia, ya que en muchos casos aún no están diagnosticados y se requiere un abordaje multidisciplinario. En este sentido los anestesiólogos están en una magnífica situación para descubrir pacientes con AOS y, dado que se asocia con alta morbilidad, no deben ignorar esta responsabilidad. Pueden diagnosticarlos en la visita previa, durante la cirugía en los casos de difícil intubación o dificultad para mantener la vía aérea o en el postoperatorio al verlos roncar y hacer apneas. Las recomendaciones para los pacientes que deben someterse a una anestesia y que padecen o se sospecha que tengan un AOS no eran muy abundantes en la literatura hasta la última década, fecha en que comienzan a aparecer las primeras guías que recogen las recomendaciones para manejo anestésico de pacientes con diagnóstico de AOS o sospecha del mismo. Las primeras recomendaciones fueron publicadas por la Academia Americana de Medicina del Sueño<sup>12</sup>. La Sociedad Americana de Anestesiólogos (SAA) publicó un documento de consenso con recomendaciones para el cuidado perioperatorio del paciente con diagnóstico o sospecha de AOS, basado en opinión de expertos<sup>13</sup>, actualizado posteriormente en 2014 con el propósito de mejorar la atención perioperatoria y reducir el riesgo de resultados adversos en pacientes con sospecha o diagnóstico confirmado de AOS que reciben sedación, analgesia o anestesia<sup>14</sup>. Posteriormente, se han publicado otras guías por diferentes grupos de trabajo y sociedades, la Sociedad Americana de Anestesia Ambulatoria<sup>15</sup>, la Sociedad de Anestesia y Medicina del Sueño, tanto para el manejo preoperatorio<sup>16</sup> como intraoperatorio<sup>17</sup>, y las guías y recomendaciones para el manejo perioperatorio de los pacientes sometidos a cirugía bariátrica<sup>18,19</sup>. Las recomendaciones que establecen estas guías y sociedades, en líneas generales, se agrupan en cuidados preoperatorios (establecer un alto nivel de sospecha previo a la cirugía), intraoperatorios (mediante un estricto control de la vía aérea durante todo el proceso) y postoperatorios (con la utilización juiciosa de la medicación y establecimiento de unos niveles de monitorización estrictos). Por lo tanto, los elementos clave en el manejo perioperatorio de los pacientes con AOS serán los siguientes:

1. La evaluación previa a la intervención (prequirúrgica).
2. Manejo o preparación del paciente en el preoperatorio.
3. Manejo de la VAS.
4. Tipo de anestesia empleado y manejo intraoperatorio.
5. Manejo del paciente en el postoperatorio.

1. Evaluación preoperatoria

La disponibilidad de una herramienta de cribado es de utilidad para el equipo preoperatorio de cara a establecer una estrategia que disminuya las potenciales complicaciones perioperatorias del paciente con AOS. La evaluación preoperatoria del paciente con diagnóstico o sospecha de AOS debe realizarse, siempre que sea posible, con antelación suficiente a la cirugía (en consulta de preanestesia) (tabla 2). Se han desarrollado algunos test para el cribado de estos pacientes que incluyen factores de riesgo como la obesidad, edad o sexo masculino, síntomas clínicos y datos de la exploración física. En todos los pacientes se debe llevar a cabo lo siguiente:

- Evaluación de la los antecedentes médicos (presencia de HTA, ictus o enfermedad cardiovascular, diabetes mellitus, historia de dificultad de vía aérea, presencia de enfermedades congénitas como síndrome de Down y malformaciones craneofaciales, así como enfermedades neuromusculares). Valoración de estudio de sueño previo, si está disponible.
- Entrevista con paciente-familiares (presencia de ronquidos, apneas, despertares, cefalea matutina, somnolencia diurna).
- Exploración física (evaluación de la vía aérea, características nasofaríngeas, circunferencia del cuello, tamaño de las amígdalas y de la lengua).

Tabla 2. Evaluación y manejo preoperatorio

|                                                                                                                                                                                                                                                                                                                                                                                                                                                                                                                                                                                                                                                                                                                                                                                                        |
|--------------------------------------------------------------------------------------------------------------------------------------------------------------------------------------------------------------------------------------------------------------------------------------------------------------------------------------------------------------------------------------------------------------------------------------------------------------------------------------------------------------------------------------------------------------------------------------------------------------------------------------------------------------------------------------------------------------------------------------------------------------------------------------------------------|
| <b>Evaluación preoperatoria</b>                                                                                                                                                                                                                                                                                                                                                                                                                                                                                                                                                                                                                                                                                                                                                                        |
| <p>El conocimiento del diagnóstico o la sospecha de AOS debe conocerse siempre con antelación suficiente a la cirugía:</p> <ul style="list-style-type: none"><li>• SI YA EXISTE DIAGNÓSTICO DE AOS: establecer la gravedad de la enfermedad Y SI está siendo tratada O NO.</li><li>• Si está recibiendo tratamiento con CPAP, cómo es cumplimiento, adherencia, efectos secundarios y resultados.</li><li>• SI EXISTE SOSPECHA DE AOS (tabla de sospecha)</li><li>• Cirugía no urgente: realizar una prueba de sueño que permita confirmarlo con la urgencia que sea necesario.</li><li>• Cirugía urgente o no demorable: tratar al paciente a todos los niveles como si tuviera un AOS.</li><li>• Posteriormente se realizará el estudio de sueño que permita confirmar o descartar un AOS.</li></ul> |
| <b>El manejo en el preoperatorio: preparación preoperatoria</b>                                                                                                                                                                                                                                                                                                                                                                                                                                                                                                                                                                                                                                                                                                                                        |
| <ul style="list-style-type: none"><li>• Diagnosticado de AOS en tratamiento con CPAP y buen cumplimiento y control: se aplicará la propia CPAP en el postoperatorio inmediato y en todo el período perioperatorio.</li><li>• Nivel de cumplimiento de CPAP inadecuado: consultar al especialista en sueño para identificar y solucionar las causas y hacer una valoración exhaustiva preoperatoria de la situación cardiopulmonar.</li></ul>                                                                                                                                                                                                                                                                                                                                                           |

- Sin diagnóstico de AOS con alta sospecha clínica que requieran ser intervenidos con urgencia: se deben manejar a todos los niveles como si de un AOS se tratara.
- En todos: si es posible se evitará el uso de benzodiazepinas solas o combinadas con analgésicos u otros sedantes. En caso de que ésta fuera inevitable el paciente deberá utilizar la CPAP en el preoperatorio inmediato. Es necesario monitorizar la SaO<sub>2</sub>, disponer de una vía venosa periférica y vigilar cuidadosamente al paciente.

CPAP: presión positiva continua en las vías respiratorias; AOS: apnea obstructiva del sueño.

El cuestionario STOP-Bang es un test sencillo (Tabla 3) que incluye cuatro medidas subjetivas (STOP por el acrónimo en inglés de roncar, cansancio, apnea observada y presión arterial alta) y cuatro elementos demográficos (Bang por el acrónimo en inglés de índice de masa corporal, edad, circunferencia del cuello y sexo), y se ha validado como instrumento de cribado para pacientes quirúrgicos<sup>20,21</sup>. Si alguna de las características previas sugiere la presencia de AOS, el anestesista y el cirujano, de mutuo acuerdo, deben decidir si se maneja al paciente de forma perioperatoria teniendo en cuenta solo criterios clínicos, si se debe realizar un estudio de sueño con posibilidad de demora de la intervención quirúrgica o si se inicia tratamiento para la AOS antes de la cirugía. Si esta evaluación se lleva a cabo el día de la cirugía, el equipo quirúrgico puede optar por una decisión basada solo en criterios clínicos. Por seguridad, los criterios clínicos (Tabla 4) deben estar bien definidos con el fin de obtener una alta sensibilidad (pese a una baja especificidad), asumiendo que ciertos pacientes serán tratados de forma más agresiva de lo necesario que si se dispusiera de un estudio de sueño. Se asume que el paciente que ya tuvo una cirugía correctiva de la vía aérea para AOS aún permanece en riesgo, al menos con un estudio de sueño normal. Una vez se ha llevado a cabo la visita preanestésica se podrá clasificar al paciente con AOS en dos categorías:

- Paciente ya diagnosticado de AOS.

La valoración preoperatoria pretende establecer la gravedad de la enfermedad tanto por la clínica y complicaciones como por los resultados de las pruebas de sueño efectuadas. De igual forma se evaluará si el paciente está siendo tratado y cuáles son los resultados del tratamiento, las posibles complicaciones de la AOS y la patología existente como causa, como consecuencia, o simplemente concurrente con la AOS. En este tipo de paciente es de especial relevancia evaluar si está recibiendo o no tratamiento con CPAP y cómo es su cumplimiento, adherencia, efectos secundarios y resultados para el paciente.

- Paciente no diagnosticado de AOS con alta sospecha clínica.

Deberán investigarse todos los posibles síntomas y signos sugerentes de AOS ya descritos y si los datos clínicos hacen sospecharlo; lo recomendable es realizar una prueba de sueño que permita confirmarlo con la urgencia que sea necesaria. En caso de cirugía no urgente el paciente deberá esperar hasta la realización de la prueba de sueño. Si, por el contrario, es una cirugía urgente o no demorable, o la lista de espera hace imposible aguardar hasta la realización de una prueba de sueño, se debe tratar al paciente a todos los niveles como si tuviera un AOS. Posteriormente, cuando sea posible, se realizará el estudio de sueño que permita confirmar o descartar un AOS.

**Tabla 3.** Cuestionario STOP-Bang.

|          |                                                                                                                                       |    |    |
|----------|---------------------------------------------------------------------------------------------------------------------------------------|----|----|
| <b>S</b> | <i>Snoring</i> (ronquidos): ¿Ronca alto?                                                                                              | Sí | No |
| <b>T</b> | <i>Tiredness</i> (fatiga): ¿Se siente cansado o somnoliento durante el día?                                                           | Sí | No |
| <b>O</b> | <i>Observed</i> (observación): ¿Le han observado pausas respiratorias durante el sueño?                                               | Sí | No |
| <b>P</b> | <i>Blood Pressure</i> (presión arterial): ¿Ha recibido o está recibiendo algún tratamiento para la hipertensión arterial?             | Sí | No |
| <b>B</b> | <i>BMI</i> (IMC, índice de masa corporal): $IMC > 35 \text{ kg/m}^2$                                                                  | Sí | No |
| <b>A</b> | <i>Age</i> (edad): edad > 50 años                                                                                                     | Sí | No |
| <b>N</b> | <i>Neck</i> (cuello): para hombres, ¿el cuello de la camisa mide 43 cm o más? Para mujeres, ¿el cuello de la camisa mide 41 cm o más? | Sí | No |
| <b>G</b> | <i>Gender</i> (Sexo): masculino                                                                                                       | Sí | No |

#### **Cuestionario STOP-Bang** <sup>20,21</sup>

Cada respuesta afirmativa suma 1 punto. La puntuación máxima es de 8 puntos.

Los pacientes se clasifican en bajo o alto riesgo en función de la puntuación. Bajo riesgo: puntuación 0-2. Riesgo intermedio: puntuación 3-4.

Alto riesgo: puntuación > 4.

Una puntuación  $\geq 3$  indica un riesgo de casi el 50% de padecer AOS, mientras que si la puntuación es < 3, el riesgo es casi nulo.



**Tabla 4.** Identificación y evaluación del paciente con AOS.

|                                                                                                                                                                                                                          |                                                                                                                                                                                                                                                                                                                                                                                            |                                                                                                                                                                                                                                                                                                                                                                                                                                                                                                             |                                                                                                                                                                                                                                                                                                                                                                 |
|--------------------------------------------------------------------------------------------------------------------------------------------------------------------------------------------------------------------------|--------------------------------------------------------------------------------------------------------------------------------------------------------------------------------------------------------------------------------------------------------------------------------------------------------------------------------------------------------------------------------------------|-------------------------------------------------------------------------------------------------------------------------------------------------------------------------------------------------------------------------------------------------------------------------------------------------------------------------------------------------------------------------------------------------------------------------------------------------------------------------------------------------------------|-----------------------------------------------------------------------------------------------------------------------------------------------------------------------------------------------------------------------------------------------------------------------------------------------------------------------------------------------------------------|
| <p><b>A. Síntomas y signos clínicos que sugieren la presencia de AOS</b></p> <p>Si el paciente tiene signos o síntomas en dos o más de las categorías previas, existe una elevada probabilidad de que padezca un AOS</p> | <p>1. Características físicas predisponentes:</p> <p>1.1. <math>IMC \geq 35 \text{ kg/m}^2</math></p> <p>1.2. Circunferencia del cuello mayor de 43 cm para hombres y de 41 cm para mujeres</p> <p>1.3. Presencia de alteraciones craneofaciales que afecten a la vía aérea</p> <p>1.4. Obstrucción nasal anatómica</p> <p>1.5. Amígdalas casi tocándose o tocándose en la línea media</p> | <p>2. Historia de aparente obstrucción de la vía aérea durante el sueño.</p> <p>Deben estar presentes al menos dos condiciones de las siguientes, salvo que el paciente viva solo o su sueño no sea observado, en cuyo caso basta con una condición:</p> <p>2.1. Ronquido alto que pueda ser escuchado con la puerta cerrada</p> <p>2.2. Ronquido frecuente</p> <p>2.3. Pausas de apnea observadas durante el sueño</p> <p>2.4. Despertares con sensación de asfixia</p> <p>2.5. Despertares frecuentes</p> | <p>3. Somnolencia (uno o más de los siguientes supuestos debe estar presente):</p> <p>3.1. Somnolencia diurna o cansancio excesivo a pesar de una higiene de sueño adecuada</p> <p>3.2. Se queda dormido fácilmente en un ambiente no estimulante (viendo la televisión, leyendo, viajando en coche o conduciendo) a pesar de una higiene de sueño adecuada</p> |
| <p><b>B. Si se ha realizado un estudio de sueño se utilizarán los resultados para determinar el manejo perioperatorio del paciente</b></p>                                                                               |                                                                                                                                                                                                                                                                                                                                                                                            |                                                                                                                                                                                                                                                                                                                                                                                                                                                                                                             |                                                                                                                                                                                                                                                                                                                                                                 |
| <p>AOS: apnea obstructiva del sueño. IMC: índice de masa corporal<br/>Modificado de Gross, 2014, solo para adultos.</p>                                                                                                  |                                                                                                                                                                                                                                                                                                                                                                                            |                                                                                                                                                                                                                                                                                                                                                                                                                                                                                                             |                                                                                                                                                                                                                                                                                                                                                                 |

**A- Manejo en el preoperatorio: preparación preoperatoria**

El paciente ya diagnosticado de AOS y en tratamiento con CPAP con buen cumplimiento y buen control sintomático no representa ningún problema. Traerán la propia CPAP a la

intervención, y esta será aplicada en el postoperatorio inmediato y en todo el período perioperatorio. Sin embargo, en aquellos pacientes con un nivel de cumplimiento de CPAP inadecuado o con efectos secundarios no corregidos será necesario consultar al especialista en sueño para identificar y solucionar las causas del mal cumplimiento. En este grupo de pacientes con bajo cumplimiento se recomienda realizar una exhaustiva valoración preoperatoria de la situación cardiopulmonar si presentan enfermedades sistémicas no controladas o alteraciones en la ventilación o el intercambio gaseoso, como síndromes de hipoventilación, hipertensión pulmonar grave o hipoxemia en reposo, en ausencia de otras enfermedades cardiopulmonares<sup>16</sup>. Los pacientes deberán ser informados de la necesidad de traer consigo la CPAP y de la importancia de que esta sea usada en el postoperatorio inmediato para reducir las complicaciones. El personal de quirófano debe conocer el manejo de la CPAP.

Los pacientes sin diagnóstico de AOS previo y alta sospecha clínica que requieran ser intervenidos con urgencia se deben manejar a todos los niveles como si de una AOS se tratara. Al igual que en los pacientes con bajo cumplimiento, se debe realizar una exhaustiva valoración preoperatoria de la situación cardiopulmonar si presentan enfermedades sistémicas no controladas o alteraciones en la ventilación o el intercambio gaseoso, como síndromes de hipoventilación, hipertensión pulmonar grave o hipoxemia en reposo, en ausencia de otras enfermedades cardiopulmonares<sup>16</sup>.

La SAA, según el documento de consenso del año 2014<sup>14</sup>, recomienda que en caso de mala respuesta a la CPAP se podría considerar como alternativa el uso de ventilación mecánica no invasiva (VMNI) e incluso la utilización de dispositivos de avance mandibular. No menos importante es la pérdida de peso durante el perioperatorio, si es posible.

En cuanto a la premedicación, utilizada de forma habitual en los pacientes quirúrgicos, suele incluir el uso de benzodiazepinas solas o combinadas con analgésicos u otros sedantes. La mayoría de estos fármacos tienen un efecto sobre la reducción del tono muscular y producen depresión del SNC, por lo que pueden aumentar la gravedad de la AOS. Por ello se recomienda que, si es posible, se evite la premedicación. En caso de que esta fuera inevitable el paciente deberá utilizar la CPAP en el preoperatorio inmediato. Es importante señalar que el uso de CPAP en estos casos permite emplear la medicación preoperatoria que sea necesaria. Es preciso monitorizar la SaO<sub>2</sub>, disponer de una vía venosa periférica y vigilar cuidadosamente al paciente, no debiendo ser premedicados en áreas donde no exista posibilidad de observación ni de monitorización adecuadas.

### **B- Manejo de la VAS**

A la previamente mencionada elevada prevalencia de la apnea obstructiva del sueño (AOS) en la población quirúrgica y frecuente ausencia de diagnóstico en el momento de la cirugía, se asocia una mayor dificultad en el manejo de la VAS de estos pacientes,

siendo uno de los 12 factores de riesgo independientes para la ventilación con mascarilla facial y de laringoscopia directa dificultosa<sup>22</sup>. Además, la mera intubación dificultosa es considerada indicador de sospecha de AOS. Sin embargo, no se ha demostrado mayor dificultad para la inserción de dispositivos supraglóticos. Estas dificultades son debidas a los cambios anatómicos de la VAS, que se pueden ver en la **tabla 5** y que incluyen una mayor ocupación orofaríngea, estrechamiento de la VAS, macroglosia, retrognatia, cuello grueso, reducción de la longitud mandibular, posicionamiento inferior del hueso hioides y posterior del maxilar<sup>22-25</sup>. Por todos estos motivos es fundamental realizar un despistaje sistemático previo a la intervención quirúrgica para su manejo adecuado, tal y como se ha comentado en el apartado previo de este DIC.

**Tabla 5.** Factores asociados al difícil manejo de la VAS en pacientes con AOS

|                                                              |
|--------------------------------------------------------------|
| Mayor ocupación faríngea                                     |
| Estrechamiento de la VAS                                     |
| Macroglosia                                                  |
| Retrognatia                                                  |
| Cuello grueso                                                |
| Posicionamiento inferior del hioides y posterior del maxilar |
| Reducción longitud mandibular                                |

AOS: *apnea obstructiva del sueño*; VAS: *vía aérea superior*.

En el entorno perioperatorio son múltiples los factores mecánicos (edema o inflamación, intubación y extubación, posición en decúbito supino) o farmacológicos que afectan a la permeabilidad de la vía aérea, cuestión especialmente importante en el escenario del paciente no ventilable y no intubable, aumentando la morbimortalidad, por lo que el anestesiólogo ha de estar preparado con una estrategia de manejo de la vía aérea tanto para los procedimientos de sedación, anestesia regional como general y no solo en la intubación, sino también en la extubación, ya que los pacientes con AOS presentan mayor riesgo de edema laríngeo y laringoespasma postoperatorio<sup>22,23</sup>.

Los pacientes se beneficiarán de una inducción en posición de olfateo con elevación del tronco y la cabeza. Es fundamental tener una correcta monitorización, así como preoxigenar antes de la inducción (con presión positiva de 10 cmH<sub>2</sub>O), y se debe considerar la estrategia de la oxigenación apneica. Hay que seguir los algoritmos de

manejo de la vía aérea difícil y el uso de los videolaringoscopios puede ser una alternativa a la intubación con fibrobroncoscopio con el paciente despierto. Tras la intubación se procederá a realizar maniobras de reclutamiento y administración de presión positiva al final de la espiración<sup>22,25</sup>.

Si el procedimiento requiere de sedación profunda, debe asegurarse la permeabilidad de la VAS con el uso de cánulas oro o nasofaríngeas y evitar las posiciones de Trendelenburg y decúbito supino. En estos casos se debe considerar el uso de CPAP durante todo el procedimiento quirúrgico, sobre todo en pacientes que ya la utilicen y tengan buena adaptación<sup>23,24</sup>.

En la **tabla 6** podemos ver de manera esquemática algunas de las medidas a seguir para el manejo pre, intra y postoperatorio del paciente con AOS.

**Tabla 6.** Recomendaciones en el manejo anestésico pre, intra y postoperatorio

| <b>Preoperatorio</b>                                            | <b>Intraoperatorio</b>                                           | <b>Postoperatorio</b>                                                         |
|-----------------------------------------------------------------|------------------------------------------------------------------|-------------------------------------------------------------------------------|
| Preoxigenación con presión positiva                             | Preferible realizar anestesia regional                           | CPAP tras extubación                                                          |
| Evitar sedantes/ansiolíticos                                    | Utilizar capnografía                                             | Estimulación (evitar dormir)                                                  |
| Valorar el uso de dexmedetomidina para sedación                 | Estrategias de analgesia multimodal o libre de opiáceos          | Técnicas analgésicas regionales                                               |
| Valorar el uso de CPAP durante la sedación                      | Asegurar la reversión de la curarización                         | Si opiáceos: PCA (evitar perfusiones continuas)                               |
| Posición olfateo                                                | Uso fármacos que preserven tono de musculatura de VAS: ketamina  | Monitorización adecuada                                                       |
| Seguir algoritmos de VAD: fibrobroncoscopio, videolaringoscopia | Si anestésicos inhalados: desflorano (mayor rapidez en emersión) | O <sub>2</sub> al menor flujo que mantenga buena saturación de O <sub>2</sub> |
|                                                                 | Extubación 30°, buen nivel conciencia, ventilación espontánea    |                                                                               |

CPAP: presión positiva continua en las vías respiratorias; PCA: analgesia controlada por el paciente; VAS: vías aéreas superiores.

### **C- Tipo de anestesia y manejo intraoperatorio**

La Sociedad Americana de Anestesia y Medicina del Sueño publicó en 2018 una guía de manejo intraoperatorio del paciente con AOS, presentando recomendaciones basadas en la actual evidencia científica<sup>23</sup>. El manejo anestésico estará determinado por la severidad de la AOS, el tipo de cirugía y las necesidades analgésicas requeridas. Los fármacos anestésicos y analgésicos interactúan con la conciencia, el sueño y la mecánica ventilatoria de manera dosis-dependiente. Los problemas de permeabilidad de la VAS por el uso de estos hipnóticos y analgésicos pueden eliminarse con el uso de técnicas regionales, por lo que estas deben realizarse siempre que sea posible; sin embargo, si se procede a la realización de una anestesia general es importante la elección de cada uno de los fármacos utilizados<sup>23-29</sup>.

La administración de benzodiazepinas como premedicación puede exponer al paciente AOS a un mayor riesgo de colapso de la VAS. Respecto al midazolam, no está claro que su efecto nocivo sea dosis-dependiente y debe evitarse. Si se utiliza, debe ser con adecuada monitorización<sup>7</sup>.

El propofol es el hipnótico más utilizado en la actividad anestésica y presenta efecto negativo en la permeabilidad de la VAS dosis-dependiente, con disminución del tono muscular y del diámetro anteroposterior de la VAS. El uso de capnografía durante la sedación con este fármaco disminuye la incidencia de complicaciones respiratorias. Los efectos depresores de los opiáceos intraoperatorios pueden mitigarse con administración de analgesia multimodal<sup>23,28</sup>.

Los bloqueantes neuromusculares utilizados durante la anestesia general pueden producir en el postoperatorio riesgo de complicaciones por su efecto residual, como hipoxemia, obstrucción de la VAS y fracaso ventilatorio. Es importante utilizar fármacos de acción corta, realizar una buena titulación y asegurar con monitorización su completa reversión previa a la extubación, sin que se pueda recomendar el uso de un reversor concreto frente a otro (sugammadex o neostigmina) en pacientes con AOS<sup>23,28</sup>.

La dexmedetomidina es un agonista  $\alpha_2$  cuyo efecto sobre la VAS parece ser mínimo. No obstante, no hay aún evidencia suficiente para dar una recomendación sobre su uso en pacientes con AOS. Este fármaco produce un sueño no REM sin depresión respiratoria, por lo que podría valorarse en función de las características cardiológicas del paciente<sup>28</sup>.

La ketamina, antagonista del receptor NMDA, tiene un efecto favorable sobre la colapsabilidad de la VAS, siendo buena alternativa en pacientes con AOS<sup>28</sup>.

Los anestésicos inhalados aumentan el colapso de la VAS. Sin embargo, cuando se valora la rapidez en la emersión de la anestesia en determinados pacientes, como los obesos, el desflorano parece ofrecer ventajas frente al uso propofol<sup>23</sup>.

En pacientes usuarios de CPAP preoperatoriamente se debe valorar su reintroducción desde el mismo momento de la extubación<sup>23,24,27</sup>.

#### **D- Manejo postoperatorio**

El postoperatorio inmediato, más especialmente las primeras 4 h, es el momento de mayor vulnerabilidad del paciente con AOS a sufrir complicaciones, entre las que se encuentran sobre todo la hipoxemia, hipercapnia, hipertensión arterial sistémica (HTA) y pulmonar (HTP), arritmias e isquemia miocárdica<sup>24,27</sup>. Tras la extubación y aún bajo los efectos de las drogas anestésicas, e influenciado por la severidad y tipo de cirugía, se produce un agravamiento de las apneas. Se han propuesto diferentes medidas para mitigar este riesgo, que se suman a los expuestos en los apartados anteriores, como la extubación con buen nivel de conciencia y en ventilación espontánea óptima, elevación de la cabecera de la cama 30° o posición de decúbito lateral, utilización de corticoesteroides para disminuir el edema de la VAS si procede, estrecha monitorización y estimulación para que el paciente no se duerma con facilidad<sup>25,30,31</sup>.

El efecto de los opiáceos en pacientes con AOS va a estar determinado no solo por el IAH, sino también por la alteración de la sensibilidad a los opioides y de la percepción del dolor que parecen presentar en este tipo de pacientes. La evidencia sugiere que sus requerimientos analgésicos deberían ser menores, por lo que hay que realizar una estrecha titulación y adecuada monitorización<sup>26</sup>. Las técnicas de analgesia regional deben primar para disminuir las necesidades de opioides. Si se precisaran, es mejor optar por una analgesia controlada por el paciente en bolos, evitando las infusiones continuas<sup>26,29,30</sup>.

La aplicación de O<sub>2</sub> sin CPAP, si bien mantiene una oximetría óptima, puede agravar la retención de CO<sub>2</sub> y disminuir los microdespertares protectores, por lo que debe administrarse el menor flujo que mantenga una adecuada saturación en los pacientes con AOS. Los que utilizan CPAP o VMNI previamente se les debe reintroducir inmediatamente después de la extubación y mantenerla durante al menos las primeras 24-48 h postoperatorias. Además, tenemos que considerar el inicio de esta terapia en pacientes que presentan episodios frecuentes o severos de obstrucción de VAS o hipoxemia en la unidad de recuperación postanestésica<sup>24,25,27</sup>. Posteriormente, solo se precisará durante las horas de sueño.

El riesgo de complicaciones es mayor en cirugía de VAS, con taponamientos nasales y con la presencia de SNG. Además, va ser más difícil la colocación de CPAP.

Pacientes con una AOS severa, que estén bien adaptados a CPAP y con optimización de sus comorbilidades pueden ser buenos candidatos a cirugía ambulatoria, en función de la agresividad del procedimiento y con mínimos requerimientos analgésicos postoperatorios<sup>25</sup>.

Otro grupo de pacientes de riesgo son los niños sometidos a adenoamigdalectomías. En muchos centros no se consideran pacientes candidatos a programas de cirugía ambulatoria si la severidad de la AOS es relevante. La mayor parte de las complicaciones se producen en las primeras 6 h postoperatorias, por lo que siempre se ha de garantizar una monitorización al menos por oximetría o valorar la estancia en unidades de mayor vigilancia<sup>31</sup>.

## BIBLIOGRAFÍA:

1. Finkel KJ, Searleman AC, Tymkew H, Tanaka CY, Saager L, Safer-Zadeh E, et al. Prevalence of undiagnosed obstructive sleep apnea among adult surgical patients in an academic medical center. *Sleep Med* 2009;10:753-8. doi: 10.1016/j.sleep.2008.08.007.
2. Reed K, Pengo MF, Steier J. Screening for sleep-disordered breathing in a bariatric population. *J Thorac Dis* 2016;8:268-75. doi: 10.3978/j.issn.2072-a1439.2015.11.58.
3. Opperer M, Cozowicz C, Bugada D, Mokhlesi B, Kaw R, Auckley D, et al. Does Obstructive Sleep Apnea Influence Perioperative Outcome? A Qualitative Systematic Review for the Society of Anesthesia and Sleep Medicine Task Force on Preoperative Preparation of Patients with Sleep-Disordered Breathing. *Anesthesia and analgesia* 2016;122:1321-34. doi: 10.1213/ANE.0000000000001178.
4. Kaw R, Chung F, Pasupuleti V, Mehta J, Gay PC, Hernández AV. Meta-analysis of the association between obstructive sleep apnoea and postoperative outcome. *Br J Anaesth* 2012;109:897-906. doi: 10.1093/bja/aes308.
5. Mokhlesi B, Hovda MD, Vekhter B, Arora VM, Chung F, Meltzer DO. Sleep-disordered breathing and postoperative outcomes after elective surgery: analysis of the nationwide inpatient sample. *Chest* 2013;144:903-14. doi: 10.1378/chest.12-2905.
6. Gupta RM, Parvizi J, Hanssen AD, Gay PC. Postoperative complications in patients with obstructive sleep apnea syndrome undergoing hip or knee replacement: a case-control study. *Mayo Clin Proc* 2001;76:897-905. doi: 10.4065/76.9.897.
7. Hai F, Porhomayon J, Vermont L, Frydrych L, Jaoude P, El-Solh AA. Postoperative complications in patients with obstructive sleep apnea: a meta-analysis. *J Clin Anesth* 2014;26(8):59-600. doi: 10.1016/j.jclinane.2014.05.010.

8. Jordan AS, McSharry DG, Malhotra A. Adult obstructive sleep apnoea. *Lancet* 2014;383:736-47. doi: 10.1016/S0140-6736(13)60734-5.
9. Wong JK, Maxwell BG, Kushida CA, Sainani KL, Lobato RL, Woo YJ, et al. Obstructive sleep apnea is an independent predictor of postoperative atrial fibrillation in cardiac surgery. *J Cardiothorac Vasc Anesth* 2015;29:1140-7.
10. Van Oosten EM, Hamilton A, Petsikas D, Payne D, Redfearn DP, Zhang S, et al. Effect of preoperative obstructive sleep apnea on the frequency of atrial fibrillation after coronary artery bypass grafting. *Am J Cardiol* 2014;113:919-23. doi: 10.1016/j.amjcard.2013.11.047.
11. D'Apuzzo MR, Browne JA. Obstructive sleep apnea as a risk factor for postoperative complications after revision joint arthroplasty. *J Arthroplasty* 2012;27:95-8. doi: 10.1016/j.arth.2012.03.025.
12. Meoli AL, Rosen CL, Kristo D, Kohrman M, Gooneratne N, Aguillard RN, et al; Clinical Practice Review Committee; American Academy of Sleep Medicine. Upper airway management of the adult patient with obstructive sleep apnea in the perioperative period-avoiding complications. *Sleep* 2003;26:1060-5. doi: 10.1093/sleep/26.8.1060.
13. Gross JB, Bachenberg KL, Benumof JL, Caplan RA, Connis RT, Coté CJ, et al. American Society of Anesthesiologists Task Force on Perioperative Management. Practice guidelines for the perioperative management of patients with obstructive sleep apnea: a report by the American Society of Anesthesiologists Task Force on Perioperative Management of patients with obstructive sleep apnea. *Anesthesiology* 2006;104:1081-93. doi: 10.1097/00000542-200605000-00026.
14. Gross JB, Apfelbaum JL, Caplan RA, Connis RT, Coté CJ, Nickinovich DG, et al. Practice guidelines for the perioperative management of patients with obstructive sleep apnea: an updated report by the American Society of Anesthesiologists Task Force on Perioperative Management of Patients With Obstructive Sleep Apnea. *Anesthesiology* 2014;120:268-86. doi: 10.1097/ALN.0000000000000053.
15. Joshi GP, Ankichetty SP, Gan TJ, Chung F. Society for Ambulatory Anesthesia consensus statement on preoperative selection of adult patients with obstructive sleep apnea scheduled for ambulatory surgery. *Anesth Analg* 2012;115:1060-8. doi: 10.1213/ANE.0b013e318269cfd7.
16. Chung F, Memtsoudis SG, Ramachandran SK, Nagappa M, Opperer M, Cozowicz C, et al. Society of anesthesia and sleep medicine guidelines on preoperative screening and assessment of adult patients with obstructive sleep apnea. *Anesth Analg* 2016;123:452-73. doi: 10.1213/ANE.0000000000001416.
17. Memtsoudis SG, Cozowicz C, Nagappa M, Wong J, Joshi GP, Wong DT, et al. Society of Anesthesia and Sleep Medicine Guideline on Intraoperative Management of Adult Patients With Obstructive Sleep Apnea. *Anesth Analg* 2018;127:967-87. doi: 10.1213/ANE.0000000000003434.
18. de Raaff CAL, Gorter-Stam MAW, de Vries N, Sinha AC, Jaap Bonjer H, Chung F, et al. Perioperative management of obstructive sleep apnea in bariatric surgery: a consensus guideline. *Surg Obes Relat Dis* 2017;13:1095-09. doi: 10.1016/j.soard.2017.03.022.
19. Schumann R, Jones SB, Cooper B, Kelley SD, Bosch MV, Ortiz VE, et al. Update on best practice recommendations for anesthetic perioperative care and



- pain management in weight loss surgery, 2004-2007. *Obesity* (Silver Spring). 2009;17:889-894. doi: 10.1038/oby.2008.569.
20. Chung F, Yegneswaran B, Liao P, Chung SA, Vairavanathan S, Islam S, et al. STOP questionnaire: a tool to screen patients for obstructive sleep apnea. *Anesthesiology* 2008;108:812-21. doi: 10.1097/ALN.0b013e31816d83e4.
21. Chung F, Subramanyam R, Liao P, Sasaki E, Shapiro C, Sun Y. High STOP-Bang score indicates a high probability of obstructive sleep apnoea. *Br J Anaesth* 2012;108:768-75. doi: 10.1093/bja/aes022.
22. Leong SM, Tiwari A, Chung F, Wong DT. Obstructive sleep apnea as a risk factor associated with difficult airway management - A narrative review. *Journal of clinical Anesthesia* 2017;45:63-8. doi: 10.1016/j.jclinane.2017.12.024.
23. Memtsoudis SG, Cozowicz C, Nagappa M, Wong J, Joshi GP, Wong DT, et al. Society of Anesthesia and Sleep Medicine Guideline on Intraoperative Management of Adult Patients With Obstructive Sleep Apnea. *Anesth Analg* 2018;127:967-87. doi: 10.1213/ANE0000000000003434.
24. Roesslein M, Chung F. Obstructive sleep apnoea in adults: peri-operative considerations. A narrative review. *Eur J Anaesthesiol* 2018;35:245-55. doi:10.1097/EJA.0000000000000765.
25. Raveendran R, Chung F. Ambulatory anesthesia for patients with sleep apnea. Review. *Ambulatory Anesthesia* 2015;2:143-51.
26. Cozowicz C, Chung F, Doufas AG, Nagappa M, Memtsoudis SG. Opioids for Acute Pain Management in Patients With Obstructive Sleep Apnea: A Systematic Review. *Anesth Analg* 2018;127:988-1001. doi: 10.1213/ANE0000000000003549.
27. Tamisier R, Fabre F, O'Donoghue F, Lévy P, Payen JF, Pépin JL. Anesthesia and sleep apnea. Clinical Review. *Sleep Medicine Reviews* 2018;40:79-92. doi: 10.1016/j.smrv.2017.10.006.
28. Ehsan Z, Mahmoud M, Shott SR, Amin RS, Ishman SL. The effects of Anesthesia and opioids on the upper airway: A systematic review. *Laryngoscope* 2016;126:270-84. doi: 10.1002/lary.25399.
29. American Society of Anesthesiologists Task Force on Perioperative Management of patients with obstructive sleep apnea. Practice Guidelines for the Perioperative Management of Patients with Obstructive Sleep Apnea. An Updated Report by the American Society of Anesthesiologists Task Force on Perioperative Management of Patients with Obstructive Sleep Apnea. *Anesthesiology* 2014;120:268-86.
30. Kaw R, Chung F, Pasupuleti V, Mehta J, Gay PC, Hernandez AV. Meta-analysis of the association between obstructive sleep apnoea and postoperative outcome. *British Journal of Anaesthesia* 2012;109(6):897-906. doi: 10.1093/bja/aes308.
31. Patino M, Sadhasivan S, Mahmoud M. Obstructive sleep apnoea in Children: perioperative considerations. *British Journal of anaesthesia*; 2013;111(S1):i83-i95. doi: 10.1093/bja/aet371.
