# Supplementary material
Source: Elsevier journal article supplement (https://www.sciencedirect.com/science/article/pii/S0300289621004099)
Supplement: mmc13 [file S0300289621004099:mmc13.pdf]

## Aspectos médico-legales de la AOS. Responsabilidad civil

**Editora:** Olga Mediano. Unidad de Sueño, Departamento de Neumología, Hospital Universitario de Guadalajara, Guadalajara, España; Departamento de Medicina, Universidad de Alcalá, Alcalá de Henares, Madrid, España. Centro de Investigación Biomédica en Red de Enfermedades Respiratorias (CIBERES), Madrid, España.

**Nieves Navarro Soriano.** Servicio de Neumología. Unidad de sueño. Hospital Clínico Universitario. Valencia.

**Alejandra Roncero Lázaro.** Servicio de Neumología. Unidad multidisciplinar de sueño. Hospital universitario San Pedro. Logroño.

**Luis de Manuel Martínez.** Ph.D. Abogado. Árbitro en responsabilidad sanitaria ante la corte del ICAM.

### 1. Introducción

La aparición y la detección de una enfermedad como la apnea obstructiva del sueño (AOS) llevan aparejados cambios importantes en la vida del paciente y de su entorno. Estos efectos tienen reflejo en la normativa legal, que rige los aspectos fundamentales para el manejo de esta nueva circunstancia y sus consecuencias. El facultativo, por la posición que ocupa, tiene especial protagonismo en este caso y, por tanto, debe conocer los términos establecidos a los que debe sujetarse su actuación.

En términos generales, y partiendo de la norma fundamental de nuestro ordenamiento jurídico, la Constitución Española recoge ya en su artículo 43 el derecho a la protección de la salud y la obligación de los poderes públicos de organizar y tutelar la salud pública. Añade que a través de la ley se establecerán los derechos y deberes de todos al respecto. Partiendo de ello, se ha promulgado una amplia normativa que regula aspectos muy diversos, con implicaciones para actores diferentes<sup>a</sup>.

---

<sup>a</sup> Debemos referirnos, con carácter general, a la Ley Orgánica 3/2018, de 5 de diciembre, de Protección de Datos personales y garantía de los derechos digitales, al Reglamento europeo UE 2016/679 Reglamento General de Protección de Datos personales, a la Ley Orgánica 10/1995, de 23 de noviembre, del Código Penal, a la Ley 14/1986, de 25 de abril, General de Sanidad, a la Ley 40/2015, de 1 de octubre, de Régimen Jurídico del Sector Público, a la Ley 41/2002, de 14 de noviembre, básica reguladora de la autonomía del paciente y de derechos y obligaciones en materia de información y documentación clínica, al Real Decreto de 24 de julio de 1889 del Código Civil, Real Decreto 818/2009 de 8 de mayo, por el que se aprueba el reglamento general de conductores, y a los Reales Decretos Legislativos 1/2007, de 16 de noviembre, por el que se aprueba el texto refundido de la Ley General para la Defensa de Consumidores y Usuarios y otras leyes complementarias, y 8/2015, de 30 de octubre, por el que se aprueba el texto refundido de

El manejo de la normativa debe permitir resolver cuestiones como: conflicto entre el derecho a la intimidad del paciente, el secreto profesional y la obligación de denunciar un hecho delictivo, establecido en el art. 259 Lecrim, y específicamente por razón de su profesión en el art. 262 del mismo cuerpo legal.

Dada la brevedad de este texto, resultará imposible profundizar en una materia que abarca innumerables tratados. Por ello, se va a centrar la cuestión en los aspectos legales fundamentales que se deben conocer, destacando los puntos más importantes que afectan al paciente y al profesional médico, en particular en su relación con la AOS, y de los que pueda derivarse alguna responsabilidad.

Ambas partes, médico y paciente, están sujetas a responsabilidad por sus actos. Junto a ellos también es usual que aparezcan terceros implicados, principalmente compañías de seguros o la responsabilidad patrimonial de la Administración Pública.

### **A) Responsabilidad penal**

Surge con la comisión de delitos sancionados en el Código Penal, cuando los actos llevados a cabo por el facultativo o por el paciente son dolosos (conscientes y voluntarios) o por imprudencia (para casos previstos expresamente en la propia ley penal). Se castiga con la imposición de una pena (sanción) por el juez penal y generalmente va acompañada de la correspondiente responsabilidad indemnizatoria, que a continuación analizamos

### **B) Responsabilidad indemnizatoria**

Tiene a su vez dos modalidades: la responsabilidad civil cuando el responsable es una persona física o jurídico-privada (médico privado o centro privado), y la responsabilidad patrimonial de la Administración pública, cuando el hecho se produce en el ámbito de un hospital público o servicio de salud público.

Surge como consecuencia de la provocación de un daño indebido, que se repara habitualmente mediante el pago de una indemnización. Cuando esto ocurre, habitualmente aparece un vínculo con una compañía aseguradora, que formará parte del procedimiento conforme a su regulación específica (Ley de Contrato de Seguro) y que establece que la compañía sea directamente responsable frente al perjudicado.

## **1. Las obligaciones y responsabilidades del médico**

La casuística en relación con la responsabilidad civil en materia de la AOS puede ser muy amplia. Vamos a analizar algunos de los principales supuestos y casos de posible responsabilidad:

---

la Ley General de la Seguridad Social. También existe normativa de carácter más específico que regula ámbitos de actuación como el régimen penitenciario o las voluntades anticipadas, sin perjuicio de la normativa específica de comunidades autónomas que hayan regulado estas materias en virtud de las competencias transferidas; especialmente en legislación reguladora de los derechos del paciente.

### **¿Quién es responsable de lo que le sucede a un paciente que está en lista de espera (p. ej., para un estudio de sueño)?**

Con carácter general, la responsabilidad en estos casos es de tipo indemnizatoria, en su vertiente de responsabilidad patrimonial de la Administración pública, existiendo precedentes judiciales respecto de otras dolencias de pacientes que ante tal demora han acudido a la sanidad privada, habiendo sido condenada la sanidad pública a indemnizarle con los gastos de la atención privada (p. ej., sentencia del Juzgado Contencioso Administrativo n.º 1 de Ourense que condena al SERGAS <https://www.actasanitaria.com/sergas-condenado-indemnizar-paciente-las-excesivas-listas-espera/>).

En estos casos no hay responsabilidad del médico facultativo, pues no hay mala praxis, sino un funcionamiento anormal (retraso) del servicio sanitario; dicha responsabilidad y su indemnización se discutirán en una reclamación administrativa que formule el paciente, tramitada por la Consejería de Sanidad correspondiente, y contra cuya decisión el paciente podrá acudir a los tribunales contencioso administrativos contra dicha consejería (no contra el médico).

Finalmente señalamos que un reciente intento de establecer en estos supuestos responsabilidad penal por el delito de omisión del deber de socorro denunciado ante la justicia penal fue archivado por falta de responsabilidad penal ([https://sevilla.abc.es/andalucia/sevi-juez-no-delito-pero-si-omision-socorro-listas-espera-andalucia-201811171319\\_noticia.html](https://sevilla.abc.es/andalucia/sevi-juez-no-delito-pero-si-omision-socorro-listas-espera-andalucia-201811171319_noticia.html)).

### **¿Qué actuaciones del médico en la AOS pueden generar responsabilidad frente al paciente y de qué tipo?**

Los “errores médicos” han generado abundante casuística y jurisprudencia cuyas líneas generales son las siguientes:

1. La prestación médica es fundamentalmente una obligación de medios y no de resultados, por lo que es más difícil.
2. Solo hay responsabilidad del médico cuando se acredita que ha incurrido en una mala praxis, es decir, que ha vulnerado la *lex artis medica* entendida no solo como el conjunto de normativa legal que regula su profesión/especialización, sino también los protocolos, guías clínicas, documentos de consenso elaborados por la comunidad científica (sociedades médicas) e incluso los protocolos internos del propio centro médico.
3. Los supuestos de condenas penales a médicos por negligencias profesionales son muy excepcionales, reservados a los casos más graves de grandes negligencias con resultados muy dañosos; el resto de “errores” médicos se dirigen a las jurisdicciones civiles (si el profesional es del sector privado) o contencioso administrativo (si es personal de un servicio sanitario público), en cuyos procesos intervienen (y responden) las correspondientes compañías de seguros.

4. Para que exista responsabilidad tiene que haber un daño evaluable objetivamente y cuantificable económicamente, no una mera situación de riesgo.

Dicho lo anterior, podemos concluir que el médico solo sería responsable de no detectar la AOS o no dar de baja laboral a un paciente en caso de que se demuestre que ha actuado contrariamente a lo indicado en los protocolos médicos que regulan la detección, el tratamiento y la evolución de dicha enfermedad, y que con ello se ha causado un daño real (no potencial) al paciente.

Tampoco sería responsable de un retraso en los informes de las pruebas practicadas por una congestión de los servicios correspondientes (en tal caso la responsabilidad sería del servicio público de salud).

### **¿Qué responsabilidades tiene el médico respecto de la información a facilitar al paciente?**

El sistema legal español establece el consentimiento informado como eje de la relación paciente-médico en la prestación por este de los actos médicos –que debe reflejarse en la historia clínica–; asimismo, la jurisprudencia del Tribunal Supremo integra dicho consentimiento como una obligación derivada de la *lex artis medica*.

Por tanto, el médico es responsable directo de que se suministre al paciente toda la información sobre su enfermedad, alternativas de tratamientos, etc., y el paciente deberá consentir expresamente en dicho tratamiento, incorporándose todo ello a la historia clínica (responsabilidad igualmente del facultativo).

En relación con el deber de información del médico hacia el paciente en orden a la existencia de la sospecha y de los riesgos que entraña el desarrollo de actividades peligrosas tanto para el paciente como para terceros, es importante –por razón de la propia naturaleza de la enfermedad analizada– que se cumpla con este, debiendo valorar el profesional, incluso, la procedencia de la baja laboral.

Por tanto, cuando un médico de una unidad de sueño visita a un paciente con alta sospecha de AOS con síntomas y/o con una profesión de riesgo debe informar ampliamente al paciente de la necesidad de someterse a diagnóstico y tratamiento adecuado, de las cautelas que debe adoptar en su vida cotidiana como consecuencia de la enfermedad y de las consecuencias que para sí mismo y que para los demás se derivan, procediendo a la realización del estudio de sueño en la mayor brevedad posible de conformidad con los medios de que se dispongan, y en función de cada caso concreto, actuando, en definitiva –para el tratamiento de la enfermedad– conforme a los protocolos. Del mismo modo, el médico responsable de reconocimiento médico debe realizar un cribado a personas con riesgo de padecer AOS y derivar a la unidad de sueño correspondiente a las personas con sospecha.

Respecto a la forma oral o escrita en que debe facilitarse la información al paciente, tanto con el objetivo de que pueda prestar su consentimiento al plan terapéutico como en orden a las consecuencias a que se viene haciendo referencia, parece conveniente

tener presente –en lo que sea de aplicación– el contenido del artículo 4.2 de la Ley 41/2002 de 14 de noviembre, básica, reguladora de la autonomía del paciente y de derechos y obligaciones en materia de información clínica que, en relación con el consentimiento informado, establece: *“La información clínica forma parte de todas las actuaciones asistenciales, será verdadera, se comunicará al paciente de forma comprensible y adecuada a sus necesidades y le ayudará a tomar decisiones de acuerdo con su propia y libre voluntad”*. Del artículo 8.2. resulta: *“el consentimiento será verbal por regla general. Sin embargo, se prestará por escrito en los casos siguientes: intervención quirúrgica, procedimientos diagnósticos y terapéuticos invasivos, y, en general, aplicación de procedimientos que suponen riesgos o inconvenientes de notoria y previsible repercusión negativa sobre la salud del paciente”* (1).

Conviene indicar que, en todo caso, la actuación del profesional en lo que a la expedición de certificados médicos se refiere debe ajustarse a la realidad del caso que examina, siendo objetivo y absteniéndose por tanto de valoraciones personales, indicando toda la información precisa en el informe para la expedición al Centro de Reconocimiento de Conductores (CRC), sin que quepa en modo alguno encubrir situaciones de riesgo, pues ello podría generar incluso la correspondiente responsabilidad penal por falsedad.

El médico solo será responsable en caso de que incumplan las obligaciones del consentimiento informado y se produzcan de daños (reales, no potenciales) en relación con la de causa-efecto de dichos incumplimientos.

Además de lo anterior, la normativa de protección de datos personales protege debidamente el tratamiento y la comunicación o cesión de los mismos en los casos de salud, estableciendo como principio general el necesario consentimiento del titular de tales datos (el paciente).

Sin embargo, dicho principio tiene una importante excepción, ya que el consentimiento del paciente para el tratamiento de los datos no es necesario cuando este tratamiento es necesario: para el cumplimiento de una obligación legal del responsable, para proteger intereses vitales o de interés para la salud pública.

### **¿Cómo debe comportarse un profesional médico con un paciente con AOS que realiza determinadas actividades (específicamente la conducción de vehículos a motor)?**

Como acabamos de ver el médico no vulnera la confidencialidad de los datos de salud del paciente cuando los comunica a las autoridades correspondientes en el supuesto que hemos señalado (cumplir las obligaciones legales del médico, proteger intereses vitales o defender el interés público sanitario).

A continuación, analizamos cuestiones ajenas a la propia relación entre el médico y el paciente pero que afectan a otras dimensiones de naturaleza administrativa, en la medida en que incide en aspectos como la obtención y la renovación del permiso de conducir, o a la propia actividad laboral del enfermo.

#### **1. Respecto de la obtención y renovación del permiso de conducir**

El conocimiento de que los pacientes con AOS no tratados tienen mayor riesgo de accidentes de tráfico y que el tratamiento con presión positiva continua en las vías respiratorias (CPAP) puede reducir este riesgo (2,3) ha sido el motivo por el que algunos países de la UE, entre ellos España, incluyen desde hace años esta enfermedad entre las que deben ser controladas para obtener o prorrogar el permiso de conducir. Más recientemente, la Directiva 2014/85 UE de la Comisión sobre el permiso de conducir, que modifica la Directiva 126/2006, ha incluido, en su anexo III, a la AOS entre los criterios de aptitud psicofísica que se han de valorar en todos los estados miembros. Esta regulación se publicó en la UE en junio de 2014 y contiene los criterios mínimos que se deben aplicar en todos los países.

España, que ya incluía a la AOS en el Reglamento General de Conductores, en concreto en su anexo IV, que regula las aptitudes psicofísicas para obtener o prorrogar el permiso de conducir, ha actualizado sus criterios acorde a la Directiva Europea mediante el Real Decreto 1055/2015, de 20 de noviembre, por el que se modifica el Reglamento General de Conductores aprobado por Real Decreto 818/2009, de 8 de mayo, que entró en vigor en enero de 2016.

Es preciso realizar cribado a todos los conductores que acuden a renovar u obtener el carnet, especialmente en poblaciones de riesgo: conductores profesionales por su mayor tiempo de exposición, los trabajadores con turnos de trabajo muy prolongados o conductores nocturnos; las personas que conducen con privación de sueño, especialmente jóvenes, o las que duermen menos de 6 h; los que consumen hipnóticos u otras medicaciones productoras de somnolencia y, finalmente, las personas que presentan síntomas relacionados con la presencia de apnea del sueño no diagnosticada. Además, también se debe buscar en personas con obesidad, enfermedades cardiovasculares y neurológicas.

Hay multitud de estudios que han analizado métodos de cribado; la mayor evidencia es para cuestionarios como STOP-BANG por su alta sensibilidad y validez (4) y EPWORTH, para medición de somnolencia (5), aunque el cuestionario Berlín también puede ser de utilidad (6). Además, se han valorado estudios añadiendo pruebas diagnósticas como oximetría o poligrafía realizadas por los CRC (7,8) o pruebas de mantenimiento de vigilia (9) sin haber conseguido establecer estas últimas en la rutina.

Con todo ello, se han establecido las **Recomendaciones específicas para la valoración de la aptitud psicofísica para la conducción de vehículos en los pacientes con AOS** (10).

- Conductores no diagnosticados de AOS ni valorados por una Unidad de Sueño (UDS):
  - o Si la persona que realiza el cuestionario obtiene un resultado en el STOP-Bang a 3 y/o escala de somnolencia de Epworth > 15 o ha tenido un accidente de tráfico con consecuencias por somnolencia en los últimos 3 años, su permiso será interrumpido y debe ser remitido a una UDS para estudio por la elevada probabilidad de padecer una AOS moderada/grave. La UDS, si procede, le realizará un estudio diagnóstico y terapéutico en el plazo de **1 mes**.

- Si el cuestionario STOP-Bang es de entre 3 y 5 sin ningún criterio acompañante, puede ser considerado APTO y remitido a su médico de atención primaria para su evaluación.
  - Si el cuestionario STOP-Bang es < 3 puntos y no hay ninguno de los criterios asociados, se considera APTO.
  - Si el cuestionario STOP-Bang es < 3 pero presenta alguno de los criterios, será considerado APTO y deberá ser remitido a su médico de atención primaria para evaluación.
- Conductores diagnosticados de AOS en una UDS o valorados en la misma.  
Se consideran **conductores aptos**:
- Pacientes con índice de apnea-hipopnea (IAH) < 30 y/o sin somnolencia excesiva (Epworth < 15) y que no precisan tratamiento.
  - Conductores que tras realizar el cribado no tienen sospecha de AOS.

#### Conductores **aptos con restricciones**:

- Pacientes con IAH > 15 con somnolencia excesiva y tratamiento con sistemas de presión positiva continua (CPAP):
  - Necesita aportar un informe de una UDS al CRC con el fin de poder realizar la valoración de su aptitud para conducir tanto para los permisos del grupo 1\* como para los del 2\*, deben acreditar, mediante dicho informe, que realizan un adecuado cumplimiento del tratamiento.
  - El conductor que cumple con estas condiciones se considera apto, con reducción del período de vigencia (máximo 3 años para el grupo 1, un año para el grupo 2).
- Pacientes con IAH > 15 más somnolencia excesiva y con tratamiento diferente a la CPAP: dispositivo de avance mandibular, cirugía, pérdida de peso, etc.
  - El informe de la UDS debe acreditar la reducción del IAH < 10 y el control de la somnolencia.
  - Como en el caso anterior, el conductor será apto, con reducción del período de vigencia.

*\*grupo 1: Grupo 1: AM, A1, A2, A, B, B+E y BTP, \*grupo 2: C1, C1+E, C, C+E, D1, D1+E, D, D+E.*

#### Conductores **no aptos**:

- Los pacientes con un IAH > 15 más somnolencia sin adecuado cumplimiento del tratamiento (independientemente del mismo) y/o sin control de la sintomatología.
- Conductor en que el tratamiento ha sido exitoso después de un período de 4-6 semanas, con adecuado cumplimiento y control de la sintomatología clínica. A criterio facultativo se podría establecer en función del tiempo de



tratamiento y la evolución una reducción del período de vigencia de 1 año hasta valorar la estabilidad clínica.

2. *En relación con la revocación de los permisos de conducción por pérdida de aptitudes psicofísicas*

El artículo 36 Real Decreto 818/2009, de 8 de mayo, por el que se aprueba el Reglamento General de Conductores establece que 1. La Jefatura Provincial de Tráfico que tenga conocimiento de la presunta desaparición de alguno de los requisitos que, sobre conocimientos, habilidades, aptitudes o comportamientos esenciales para la seguridad de la circulación o aptitudes psicofísicas, se exigían para el otorgamiento de la autorización, previos los informes, asesoramientos o pruebas que, en su caso y en atención a las circunstancias concurrentes, estime oportunos, iniciará el procedimiento de declaración de pérdida de vigencia de esta.

Por tanto, debe establecerse un consenso en la comunidad médica sobre el deber de comunicar a las autoridades de tráfico los supuestos que la gravedad de la situación médica del paciente AOS así lo requiera, estableciéndose el correspondiente protocolo sobre cuáles son tales casos y los canales de comunicación necesarios.

3. *La Ley de Prevención de Riesgos Laborales*

Se ha de tener presente, por otra parte, y en lo que a los accidentes laborales se refiere, la normativa vigente en materia de prevención de riesgos laborales, resultando del contenido de la Ley 31/1995, de 8 de noviembre –artículo 22–, el deber que se impone al empresario de garantizar a los trabajadores a su servicio la vigilancia periódica de estado de salud en función de los riesgos inherentes al trabajo, vigilancia que si en principio solo puede llevarse a cabo cuando este presente su consentimiento, pero que puede ser obligatoria en aquellos supuestos en los que se supone un riesgo para el trabajador o terceros.

Las mutuas laborales deben realizar un estudio de trastornos del sueño en profesionales de riesgo, por un lado, como se ha hablado en el anterior apartado, aplicar el protocolo específico a conductores profesionales.

Por otro lado, también es importante aplicar medidas de cribado en otros tipos de trabajadores, como en los trabajadores a turnos (11) donde la prevalencia de AOS es más elevada y además el uso de CPAP en trabajadores con AOS mejora la efectividad en el trabajo, evita errores, mejora la calidad de vida y reduce el absentismo laboral y accidentes laborales (12,13). Por lo que es muy importante realizar un cribado en los trabajadores y evaluar la sospecha de AOS y hacer un control del tratamiento en pacientes diagnosticados en relación con la unidad de sueño correspondiente.

## 2. **La responsabilidad del paciente**

La responsabilidad de mayor trascendencia que se puede imputar al paciente es la regulada en el **Código Penal**, siendo la más frecuente la derivada de accidentes de tráfico relacionados con la AOS (10). El Código Penal castiga tanto el dolo como la



imprudencia en casos como el homicidio o las lesiones, que pueden producirse como consecuencia de los efectos de esta enfermedad. Es decir, la conducta imprudente del paciente en relación con el conocimiento o gestión de la enfermedad podría ser suficiente para establecer su condena.

El paciente es el mejor conocedor de sus circunstancias, las cuales conformarían la gravedad de su acción: si ha sido diagnosticado con carácter previo al accidente o si lo ha sido después, si la enfermedad que padece es grave o leve, si se ha negado a seguir el tratamiento, si ha conducido pese a no habersele renovado el permiso de conducir, si consta la existencia de siniestros anteriores, etc. Todo ello conformará un conjunto de factores a partir de los cuales el juzgador podrá determinar la gravedad de la conducta y si alcanza la trascendencia suficiente como para encauzarla a través de un proceso penal.

Por ejemplo, en la sentencia 443/2014, de la Audiencia Provincial de Burgos, Sección n.º 1. En dicho caso se enjuiciaba un siniestro de tráfico con una víctima mortal. El acusado, conductor de camión, padecía de AOS moderada, diagnosticado a posteriori del accidente. En este caso, el juzgador debatía si las circunstancias en las que condujo determinaban imprudencia **grave** (delito) o **leve** (falta)<sup>b</sup>.

Esta situación de somnolencia que finalmente provoca que el que la padece quede dormido, lejos de excluir la culpabilidad del conductor, constituye la base para el nacimiento de la imprudencia o negligencia tipificadora de la falta del artículo 621.2 del Código Penal -LEVE-.

Este Tribunal de Apelación comparte íntegramente la valoración realizada por la Juzgadora de instancia en el fundamento de derecho segundo de su sentencia, al decir que “no cabe duda de que la actuación de un conductor profesional de camión, que se deja vencer por el sueño sin detener el vehículo y ponerlo a salvo, resulta sobradamente comprendida en el artículo 621.2 del Código Penal (LEVE), objeto de acusación (....) se trata de un profesional de la conducción (transportista) que, conduciendo un vehículo de gran tamaño (camión), a pesar de sentir somnolencia o cansancio, invade el carril contrario de una autovía causando la muerte del conductor del vehículo contrario”.

Ante la somnolencia o cansancio, la actuación prudente hubiera sido detener su camión hasta que hubiera desaparecido, descansando y durmiendo lo suficiente, y solo reanudar la circulación una vez que tuviese las condiciones físicas y psicológicas apropiadas para ello. Era previsible que, de no hacerlo así, esa inicial somnolencia terminase en sueño, más o menos profundo, y que, quedando dormido el acusado al volante de su camión en marcha, se produjera el accidente, como así ocurrió.

---

<sup>b</sup> Debe tenerse en cuenta que con posterioridad a esta sentencia fueron derogadas las faltas.

En este caso concreto no se estimó que el conductor actuase con imprudencia grave, pues entre otras cosas había sido diagnosticado de AOS tras el siniestro. No obstante, se consideró que padecer esa enfermedad tampoco excluía su responsabilidad, pues no es como la narcolepsia, que puede provocar ataques repentinos de sueño. El conductor enfermo de AOS debió conducir pese a haber percibido somnolencia o cansancio previo, y aun así no detuvo su camión. Por ello se fijó la existencia de imprudencia, aunque leve. No obstante, en función del caso que se esté enjuiciando, podría valorarse como grave y llegar a condenarse al conductor por un delito de homicidio por imprudencia grave. Por lo tanto, el paciente debe ser consciente y conocedor de la gravedad de las consecuencias de su comportamiento en relación con su enfermedad y de las responsabilidades penales que pueden derivarse.

Paralelamente a responsabilidad penal encontramos la **responsabilidad civil**, cuyos fundamentos hemos expuesto anteriormente. El paciente, al igual que el facultativo, también se halla sujeto a que se le pueda exigir resarcir un daño indebido que haya provocado sobre un perjudicado que se resolvería principalmente mediante la imposición del pago de una indemnización.

También es importante destacar que el paciente, cuando ostente la condición de perjudicado, deberá guardarse de no incurrir en actos que puedan exponerle o provocarle un daño a sí mismo, pues cabe que el juzgador considere que el daño se ha producido por su culpa exclusiva, o en concurrencia con la de otros, lo que extinguirá o minorará el importe susceptible de ser percibido como reparación.

La AOS también tiene repercusiones en el ámbito laboral del paciente, que pueden llegar a ser graves, al limitar su capacidad residual para trabajar (12). Numerosas resoluciones judiciales tratan consecuencias derivadas de la enfermedad: accidentalidad laboral, despidos improcedentes, bajas, prevención de riesgos, etc. En todo caso, el paciente tiene la responsabilidad de no incurrir en actos de mala fe, imprudencia o temeridad en sus actividades profesionales, respetando las limitaciones, cese de actividades o exclusiones que se le impongan, y siendo consciente de la trascendencia de determinadas actividades: conducción de camiones, uso de maquinaria pesada, transporte de pasajeros, etc.

También existen muchos casos sobre la impugnación de resoluciones administrativas sobre incapacidad e invalidez por AOS, en las que habrá que estar al caso, y el paciente en concreto, ponderando sus circunstancias personales y laborales para determinar su situación laboral de forma individualizada.

Será de interés del paciente conocer las prestaciones a las que puede acceder, el procedimiento para hacerlo, o cualquier otra acción en defensa de sus derechos laborales. Por otro lado, también deben considerarse las consecuencias en relación con las medidas de prevención de riesgos laborales que deba asumir el empleador del paciente.

En el campo de las **compañías aseguradoras**, la AOS también se envuelve en múltiples controversias. Las más comunes que podemos encontrar son las relativas a cuando un paciente, o su representante o heredero, reclama a la compañía aseguradora

una cobertura, pero en la suscripción de la póliza no se ha informado debidamente a la compañía sobre la situación real del enfermo o la aseguradora se opone al pago por algún otro motivo.

Es obvio que el precio de una póliza de seguro oscila en función del riesgo que asume la compañía y el hecho de manifestar la existencia de una patología previa como la AOS puede conllevar que el precio se incremente considerablemente. No obstante, el asegurado debe ser consciente de que pesa sobre él la obligación de no omitir información relevante en el momento de la contratación, so pena de llegado el momento la aseguradora trate de eludir el pago de la cobertura acordada en virtud de esa omisión.

Por último, cabe destacar otra posible implicación que puede tener la AOS en el ámbito del **derecho de familia**. Se ejemplificará a través de la mención de dos sentencias:

En primer lugar, Sentencia 307/2007, de la Audiencia Provincial de Zaragoza, de 12 de junio de 2007, que resuelve una demanda de divorcio. El esposo alega entre otros argumentos, para minorar la prestación compensatoria que le reclama a la que fuera su esposa, que padece AOS como un elemento negativo a la hora de considerar su situación personal global, tratando de mitigar el aparente desequilibrio entre uno y otro que provoca la ruptura matrimonial.

Y, en segundo lugar, Sentencia 215/2017, de la Audiencia Provincial de Alicante, de 21 de julio de 2017, sobre un asunto en el que dos progenitores se disputan la guarda y custodia de una menor de 3 años. En este caso se resuelve que el padecimiento de AOS por el padre desaconseja el establecimiento de una custodia compartida, tal y como solicitaba este, por considerar que existen riesgos para la menor:

Y especialmente, por la dolencia que padece el padre, según el único informe médico que obra en autos (folio 46), en donde consta que sufre “apnea obstructiva del sueño”, lo cual, valorando la edad de la menor (que acaba de cumplir 3 años), hace desaconsejable el establecimiento de la custodia compartida.

Cierto es que en el referido informe se recogen las referencias del paciente sobre la evolución favorable de la enfermedad (“se encuentra asintomático, sin somnolencia diurna, duerme bien”); sin embargo, no se han aportado a autos los resultados del estudio de sueño basal que en ese mismo informe el facultativo que lo emite dice solicitar para “objetivar la desaparición de la AOS. Cito en un mes”.

Con ello, no se hace posible concluir que han desaparecido todos los riesgos que esta patología del padre puede suponer para la menor.

## **BIBLIOGRAFÍA:**

1. Julio César Galán. "Responsabilidad Civil Médica", Cuadernos de Derecho Judicial del Consejo General del Poder Judicial: "La Responsabilidad Civil Profesional" VII-2003.
2. Garbarino S, Pitidis A, Giustini M, Taggi F, Sanna A. Motor vehicle accidents and obstructive sleep apnea syndrome. *Chronic Respiratory Disease* 2015;12 (4):320-8.
3. Tregear S, Reston J, Schoelles K, Phillips B. Continuous positive airway pressure reduces risk of motor vehicle crash among drivers with obstructive sleep apnea: systematic review and meta-analysis. *Sleep* 2010;33(10):1373-80.
4. Popevic MB, Milovanovic A, Nagorni-Obradovic L, Nesic D, Milovanovic J, Milovanovic APS. Screening commercial drivers for obstructive sleep apnea: Validation of STOP-Bang questionnaire. *Int J Occup Med Environ Health* 2017;30(5):751-61.
5. Baiardi S, La Morgia C, Sciamanna L, Gerosa A, Cirignotta F, Mondini S. Is the Epworth Sleepiness Scale a useful tool for screening excessive daytime sleepiness in commercial drivers? *Accid Anal Prev* 2018;110:187-9.
6. Tasbakan MS, Ekren PK, Uysal FE, Basoglu OK. Evaluation of Traffic Accident Risk in In-City Bus Drivers: The Use of Berlin Questionnaire. *Turk Thorac J* 2018;19(2):73-6.
7. Wu WT, Tsai SS, Liao HY, Lin YJ, Lin MH, Wu TN, et al. Usefulness of overnight pulse oximeter as the sleep assessment tool to assess the 6-year risk of road traffic collision: evidence from the Taiwan Bus Driver Cohort Study. *Int J Epidemiol* 2017;46(1):266-77.
8. Ueyama M, Kokuto H, Sugihara H, Oikawa S, Suzuki F, Goto H, et al. Investigation of Obstructive Sleep Apnea Using Portable Monitors and Health Check Data in Japanese Drivers. *J Atheroscler Thromb* 2018;25(11):1118-27.
9. Trost M, Machleit-Ebner A, Neddermann M, Young P. Assessment of ability to drive in obstructive sleep apnea patients using a driving simulator. *Somnologie* 2019.
10. Teran-Santos J, Egea Santaolalla C, Montserrat JM, Masa Jiménez F, Librada Escribano MV, Mirabet E, et al. Sleep Apnea and Driving. Recommendations for Interpreting Spanish Regulations for Drivers. *Arch Bronconeumol* 2017;53(6):336-41.
11. Sakamoto YS, Porto-Sousa F, Salles C. [Prevalence of obstructive sleep apnea in shift workers: a systematic review]. *Cien Saude Colet* 2018;23(10):3381-92.
12. Garbarino S, Guglielmi O, Sanna A, Mancardi GL, Magnavita N. Risk of Occupational Accidents in Workers with Obstructive Sleep Apnea: Systematic Review and Meta-analysis. *Sleep* 2016;39(6):1211-8.
13. Stepnowsky C, Sarmiento KF, Bujanover S, Villa KF, Li VW, Flores NM. Comorbidities, Health-Related Quality of Life, and Work Productivity Among People With Obstructive Sleep Apnea With Excessive Sleepiness: Findings From the 2016 US National Health and Wellness Survey. *J Clin Sleep Med* 2019;15(2):235-43.
