# Supplementary material
Source: Elsevier journal article supplement (https://www.sciencedirect.com/science/article/pii/S0300289621004099)
Supplement: mmc15 [file S0300289621004099:mmc15.pdf]

## 5.2. Cronobiología del sueño

**Editor:** Josep María Montserrat. Unidad Multidisciplinar de Patología del Sueño y VNID, Servei Pneumologia, Institut Clínic Respiratori, Hospital Clínic, Barcelona, España; Universidad de Barcelona, Barcelona, Centro de Investigación Biomédica en Red de Enfermedades Respiratorias (CIBERES), Madrid, España.

**Juan Antonio Madrid Pérez.** Catedrático de Fisiología y director del Laboratorio de Cronobiología. Universidad de Murcia. IMIB-Arrixaca. CIBERFES. Instituto de Salud Carlos III. Madrid.

### El sueño, un ritmo circadiano

No fue hasta la década de los 80 cuando un médico y cronobiólogo alemán, Jürgen Aschoff, investigador del Instituto Max Planck de Heidelberg, consiguió demostrar inequívocamente que el sueño humano era la manifestación de un ritmo circadiano (categoría de ritmos biológicos con períodos de aproximadamente 24 h). Para ello aisló a voluntarios durante semanas en ausencia de cualquier tipo de información temporal externa (sin relojes, ni señales de luz u oscuridad natural), y pudo demostrar que el ritmo de sueño se mantenía con períodos ligeramente superiores a 24 h<sup>1,2</sup>. Cuando se permitió a los voluntarios acceder al exterior del laboratorio sus ritmos circadianos se sincronizaron progresivamente al ciclo ambiental de 24 h. Estos experimentos demostraron que el ritmo de sueño es de carácter endógeno (su momento y duración son dependientes de nuestro tiempo interno) y que puede ser sincronizado por señales de tiempo externas.

El conjunto de estructuras que generan el tiempo interno y lo sincronizan con el ciclo ambiental se denomina sistema circadiano. Este funciona como una enorme orquesta, donde cada ritmo está producido por un conjunto de músicos, con capacidad para tocar de forma autónoma, si bien el momento en que cada uno entra en la sinfonía es marcado por un director de orquesta.

En nuestro cuerpo, el director de orquesta son los núcleos supraquiasmáticos (NSQ), localizados en el hipotálamo<sup>3</sup>. Los músicos son las células, tejidos y órganos como el hígado, riñón, corazón o músculo esquelético. El director de la orquesta envía señales humores como cortisol y melatonina, señales físicas como cambios de temperatura y señales nerviosas a través de vías selectivas del sistema nervioso autónomo a los músicos, responsables últimos de la generación de cuantos ritmos podemos registrar en el organismo. Tanto los NSQ como los osciladores periféricos son relojes que se desajustan ligeramente con respecto a las 24 h, por lo que continuamente han de sincronizar su fase mediante señales rítmicas externas, denominadas sincronizadores

o *zeitgebers*. Entre estas señales, el ciclo de luz-oscuridad es, sin lugar a dudas, el más importante. Sin embargo, sus efectos se ven potenciados por el resto de sincronizadores como son los horarios regulares de actividad física, de comidas y contactos sociales<sup>4</sup>.

Aunque el reloj biológico es muy importante, las características de duración y horarios de sueño no solamente dependen de un marcapasos circadiano. En los años 80 del siglo pasado Alexander Bórbely y Serge Daan formularon el modelo de dos componentes para explicar la regulación del sueño y la vigilia en humanos. Según este modelo, aún ampliamente aceptado, uno de los componentes, denominado homeostático, actúa como si generase un “hambre de sueño”, de modo que la presión del sueño crece cuanto más tiempo permanecemos despiertos. Pero para evitar que durmamos demasiado pronto durante el día entra en acción el segundo componente, el circadiano. El NSQ genera señales de alerta que en principio contrarrestan la presión homeostática del sueño, que aumenta progresivamente a lo largo del día. Al comienzo de la noche estas señales se van debilitando, permitiendo que el sueño venza a la vigilia y que podamos pasar toda la noche sin despertar.

Sin lugar a duda, la duración del día y la noche ha sido el ciclo ambiental más preciso que ha conocido la vida desde su aparición en la Tierra. Este marco rítmico tan estable favoreció que fuese seleccionado por los organismos como el principal sincronizador para poner en hora sus relojes biológicos. Sin embargo, la invención y el abuso de la luz eléctrica a escala planetaria están reduciendo la oscuridad y la noche a su mínima expresión. La luz utiliza una vía visual, independiente de la visión consciente, para la sincronización del sistema circadiano. Esta vía se inicia en las células ganglionares intrínsecamente fotosensibles de la retina (ipRGC) cuyo pigmento, la melanopsina, es especialmente sensible a la luz azul, y alcanza el NSQ a través del tracto retinohipotalámico. Cuando llega la noche, el NSQ activa la glándula pineal y se sintetiza la melatonina, que viaja hasta las últimas células del organismo, difundiendo su mensaje de “oscuridad química”.

Además del tiempo interno generado por el reloj circadiano y el tiempo ambiental dependiente del ciclo luz-oscuridad, existe un tercer tiempo, el social, que está impuesto por el horario oficial y los horarios de trabajo y de ocio. Si bien este tiempo no ha sido una invención reciente, hasta hace poco no había planteado ningún conflicto con los otros dos tiempos. Fundamentalmente porque los horarios de trabajo se adaptaban al tiempo interno y este, a su vez, al tiempo ambiental. Sin embargo, a finales del siglo XVII, con la invención de la máquina de vapor y el advenimiento de la revolución industrial en Inglaterra, los trabajadores se vieron obligados a cubrir mediante turnos de trabajo las 24 h del día. A partir de este momento la hora oficial y el tiempo social de origen laboral cobran toda su importancia y devienen en un nuevo tiempo potencialmente disruptor.

## La cronodisrupción, un desajuste entre los tres tiempos

En la actualidad la mayoría de las alteraciones cronobiológicas, no secundarias a enfermedades o al envejecimiento, se explican por un desajuste entre los tiempos interno, ambiental y social.

Cada vez más estudios epidemiológicos asocian la cronodisrupción con un aumento de la incidencia y una aceleración en la progresión de numerosas patologías, entre las que se encuentran: deterioro cognitivo, enfermedad cardiovascular, algunos tipos de cáncer, envejecimiento acelerado, trastornos metabólicos como la diabetes, alteraciones de sueño, depresión, inmunodepresión e infertilidad<sup>5</sup>. La interacción entre estos tres tiempos puede explicar la mayoría de las patologías de sueño de origen circadiano como son el avance y retraso de fase (desajuste tiempo interno-ambiental), el ritmo en curso libre (ausencia de tiempo ambiental y social), el patrón arrítmico (pérdida o atenuación de los tres tiempos), el trastorno debido a trabajo a turnos (desajuste entre tiempo social-interno), el *jet-lag* (desajuste tiempo ambiental-interno).

La interacción entre estos tiempos puede ser cuantificada mediante el test de los tres tiempos, disponible en <https://www.um.es/cronobiologia/taller-del-relojero/autoevaluacion/test-tres-tiempos/>, desarrollado por el Laboratorio de Cronobiología de la Universidad de Murcia.

## **BIBLIOGRAFÍA:**

1. Aschoff J. Circadian rhythms in man. *Arzneimittelforschung* 1978;28:1820-7.
2. Aschoff J. On the relationship between motor activity and the sleep-wake cycle in humans during temporal isolation. *J Biol Rhythms* 1993;8:33-46.
3. Moore RY, Eichler VB. Loss of a circadian adrenal corticosterone rhythm following suprachiasmatic lesions in the rat. *Brain Res* 1972;42:201-6.
4. Madrid JA. Los relojes de la vida. Una introducción a la Cronobiología. En: *Cronobiología Básica y Clínica*. Editec@Red, Madrid, 2006.
5. Garaulet M, Madrid JA. Chronobiology, genetics and metabolic syndrome. *Curr Opin Lipidol* 2009;20:127-34.
