# Supplementary material
Source: Elsevier journal article supplement (https://www.sciencedirect.com/science/article/pii/S0300289621004099)
Supplement: mmc18 [file S0300289621004099:mmc18.pdf]

# Capítulo 6

## Diseño de atención y desarrollo de las unidades de sueño

### 6.1. Coste-efectividad

**Editor:** Josep María Montserrat. Unidad Multidisciplinar de Patología del Sueño y VNID, Servei Pneumologia, Institut Clínic Respiratori, Hospital Clínic, Barcelona, España; Universidad de Barcelona, Barcelona, Centro de Investigación Biomédica en Red de Enfermedades Respiratorias (CIBERES), Madrid, España.

**María José Masdeu Margalef.** Unidad Multidisciplinar del Sueño. Parc Taulí Hospital Universitari. Institut d'Investigació i Innovació Parc Taulí. Universitat Autònoma de Barcelona. Sabadell. Barcelona. Centro de Investigación Biomédica en Red de Enfermedades Respiratorias (CIBERES). Madrid.

### Resumen

La sostenibilidad y eficiencia de las unidades de sueño estarán definidas por un uso coste-efectivo de los recursos. Promover unidades de sueño coste-efectivas implicará diseñar unidades con capacidad de diagnóstico y capacidad de tratamiento con estrategias que tengan un índice coste-efectividad medio-bajo con un menor coste por cada unidad de beneficio neto o efectividad que producirán. Es por esto que cualquier planteamiento de estrategia de futuro debe considerar un análisis de coste-efectividad, el cual debe incluir en el análisis elementos como los procesos a realizar, su calidad, los resultados (*outcomes*) y además reportar el análisis desde dos perspectivas, la social y la del sistema sanitario.

### 1. Coste-efectividad<sup>1,2</sup>

La elevada prevalencia de la Apnea Obstruktiva del Sueño (AOS), la cronicidad de la patología y la morbilidad y mortalidad asociadas con las concomitantes repercusiones sociales y económicas obligan a las unidades de sueño a ser más eficientes a través de un uso coste-efectivo de los recursos. Los costes sanitarios derivados de los pacientes con AOS son más elevados respecto a la población general, se incrementan con el paso del tiempo hasta que se realiza el diagnóstico y disminuyen en la fase inicial del tratamiento efectivo, llegando entonces a valores de costes similares a los de la población general. El elevado coste económico derivado de la AOS puede ser directo (atención hospitalaria e instituciones sanitarias, medicación y atención médica) e indirecto (baja productividad, absentismo laboral, incapacidades laborales y temprana mortalidad).

La sostenibilidad de los sistemas sanitarios y en concreto de las unidades de sueño pasa por realizar análisis de coste-efectividad que den información de cómo aplicar estrategias nuevas o las ya existentes, así como intervenciones preventivas y de salud pública con un juicioso uso de los recursos. En este sentido, la Estrategia para el Abordaje de la Cronicidad en el Sistema Nacional de Salud establece objetivos y recomendaciones para orientar la organización de los servicios hacia la mejora de la salud de la población, la prevención de las condiciones de salud y las limitaciones en la actividad de carácter crónico, así como su atención integral.

Promover unidades de sueño coste-efectivas pasa por diseñar unidades con **capacidad de diagnóstico**, abarcando la máxima población posible y sobre todo los casos graves, y **capacidad de tratamiento**, asegurando terapia individualizada a cada paciente y una buena adhesión a largo plazo. El objetivo será conseguir unidades de sueño con estrategias o planes de ruta con un índice coste-efectividad medio bajo (eficientes), ya que tendrán un menor coste por cada unidad de beneficio neto o efectividad que producirán. Pero los análisis de coste-efectividad por sí solos no son suficientes para establecer estándares de actuación, ya que no captan todos los aspectos involucrados en la situación analizada. Es por esto que un análisis de coste-efectividad debe considerar elementos como los procesos a realizar, su calidad, los resultados (*outcomes*) y reportar además el análisis desde dos perspectivas, la social y la del sistema sanitario.

## **1.1. Coste-efectividad de los procesos<sup>3-6</sup>**

### **1.1.1. Estrategias de diagnóstico**

Basadas en estratificar la probabilidad y la gravedad pretest de la enfermedad para determinar el tipo de estudio a realizar, el ámbito donde realizarlo y los profesionales involucrados. Se considera que cuando una enfermedad es muy prevalente todos los niveles asistenciales y administrativos deben estar implicados en su manejo.

#### **1.1.1.1. Tipo estudio de sueño.**

Polisomnografía convencional (estudios tipo 1) frente a poligrafía respiratoria (estudios tipo 3). En pacientes con probabilidad pretest moderada-alta de padecer AOS y sin comorbilidades asociadas la poligrafía respiratoria domiciliaria ha mostrado no inferioridad en el diagnóstico respecto a la polisomnografía hospitalaria y un menor coste, condicionado sobre todo por el menor coste de la prueba. Los modelos que combinan la poligrafía respiratoria domiciliaria y polisomnografía en hospital para casos con comorbilidades o cuando la poligrafía no es concluyente son coste-efectivos.

#### **1.1.1.2. Ámbito y profesionales en el diagnóstico.**

Unidades de sueño frente a atención primaria.

Los modelos basados en un diagnóstico simplificado en modelos ambulatorios que impliquen enfermería especializada en sueño y/o médicos de atención primaria han

mostrado no inferioridad en los resultados para los pacientes comparado con las estrategias basadas únicamente en el manejo por los especialistas de sueño y en el laboratorio de sueño.

### **1.1.2. Estrategias de tratamiento**

#### **1.1.2.1. Tipo y ámbito del tratamiento.**

Domicilio frente a hospital. Sistemas automáticos frente a sistemas manuales.

Tratar a los pacientes que padecen un AOS con presión positiva continua en las vías respiratorias (CPAP) es coste-efectivo, ya que reduce las comorbilidades asociadas y los costes derivados del uso de los recursos sanitarios. Además, mejora la productividad laboral y reduce el absentismo laboral. La CPAP se considera hoy en día uno de los tratamientos más coste-efectivos (1.033 euros/QALY). No hay estudios detallados de coste-efectividad de las otras terapias aplicadas en la AOS.

Estudios de titulación de CPAP con sistemas automáticos en pacientes seleccionados (estables y sin comorbilidades cardiorrespiratorias) han mostrado resultados equivalentes para los pacientes y adhesión al tratamiento no inferior y con menor coste comparados con los sistemas de titulación manual.

#### **1.1.2.2. Estrategias de seguimiento a largo plazo<sup>6</sup>**

La efectividad de la CPAP se ve limitada por baja adhesión, por lo que se precisan programas de seguimiento a largo plazo que refuercen la continuidad del tratamiento. Los estudios han mostrado que la adhesión a CPAP se asocia positivamente a mejores resultados económicos, con lo que estrategias que favorezcan a la adhesión a CPAP son imperativas desde el punto de vista clínico, de salud pública y el económico.

Los programas educacionales intensivos recomendados al inicio de la terapia son altamente caros.

La telemedicina parece prometedora en facilitar el manejo de la AOS, ya que puede ayudar en el diagnóstico (métodos automáticos y simples de diagnóstico), en la adhesión a CPAP al inicio del tratamiento y a largo plazo y facilitar el trabajo en red de los diferentes profesionales involucrados. A pesar de esto queda por determinar con firmeza su coste-efectividad.

\*En resumen, podemos decir que los modelos que combinan estudios de diagnóstico ambulatorio y de titulación de CPAP con sistemas automáticos en modo ambulatorio y en pacientes seleccionados son los de menores costes, derivados del menor coste de las pruebas realizadas. A pesar de esto, los costes reales de estas estrategias ambulatorias no están evaluados en su globalidad, ya que se debería determinar el impacto económico que puede tener en el coste real la menor exactitud de la poligrafía respiratoria a domicilio. El futuro pasa por realizar estudios que capten a la vez la

efectividad clínica y el coste para clarificar así el impacto económico real de las estrategias ambulatorias.

### **1.2. Calidad y resultados de los procesos coste-efectivos<sup>7</sup>**

En España hay una gran heterogeneidad en la manera cómo los pacientes con AOS son manejados en los diferentes territorios del estado. Esto puede dar lugar a variabilidad en los patrones de práctica clínica y, en consecuencia, podría resultar en una atención subóptima o no coste-efectiva. Es por esto que buscar estrategias coste-efectivas es imprescindible, pero tiene que ir en paralelo a que esas estrategias aseguren la calidad de la asistencia realizada, así como su viabilidad en el territorio. Las medidas de calidad están focalizadas en los resultados y en los procesos, es decir, que le pasa al paciente como consecuencia de la atención sanitaria recibida, y en este sentido, el *Adult OSA Quality Measures Work Group* de la Academia Americana del Sueño propone en función de los datos de la literatura enfocar los análisis de calidad a tres objetivos: 1) mejorar la detección y categorización de la enfermedad; 2) mejorar la calidad de vida, y 3) reducir el riesgo cardiovascular. Es por esta razón que sería recomendable que las unidades de sueño pudieran definir aquellas variables (fáciles para el clínico y la administración) que permitieran evaluar la calidad de la asistencia realizada y enfocada a resultados concretos y su coste-efectividad.

### **1.3. Perspectivas de los análisis coste-efectivos<sup>8,9</sup>**

Muchos de los análisis de coste-efectividad realizados no son comparables dada la variabilidad en la metodología usada y en la forma de reportar los resultados. Cualquier análisis de coste-efectividad que se plantee debería seguir las recomendaciones del panel de expertos para asegurar así la comparación entre estudios y calidad de los mismos, y reportar el análisis siempre desde dos perspectivas, la del sector sanitario y la social.

Hay que remarcar que los análisis de coste-efectividad por sí solos no son suficientes para la toma de decisiones estándar, ya que no captan todos los elementos de la problemática. Maximizar la cantidad total de la salud no será la única preocupación del que toma las decisiones, el que recibe los beneficios también importa. Es por esto que hay que seguir trabajando en la evaluación de algunos puntos clave que nos permitan entender el impacto económico de los procesos de diagnóstico y los tratamientos de la AOS tales como:

- Evaluar medidas directas e indirectas de los costes de la AOS.
- Evaluar medidas de calidad de vida general y específica de la AOS.
- Análisis económicos en grupos específicos con AOS como mujeres, ancianos, niños.
- Analizar el impacto económico de la AOS y de su tratamiento en el contexto de comorbilidades.

- Estudios de coste-efectividad de las diferentes metodologías para favorecer la adhesión a CPAP como la telemedicina, terapias psicológicas.
- Estudios de coste-efectividad desde la perspectiva de la empresa.
- Evaluar el coste-efectividad de las estrategias de diagnóstico y de tratamiento de la AOS en diferentes territorios.
- Análisis económicos comparativos de la efectividad de los tratamientos de la AOS.

## Conclusiones

Los modelos asistenciales coste-efectivos implican el trabajo en red, trabajo multidisciplinario y telemedicina que implique a la atención primaria y la enfermería u otros profesionales de la salud de la patología del sueño.

- Sin duda es preciso transferir a primaria a los pacientes con muy buena evolución con capacidad de *feedback*. Esto necesita que enfermería y otros profesionales deben, al igual que los médicos, tener una adecuada preparación y formación.
- Son necesarios protocolos estrictos con los pertinentes diagramas de flujos.

## BIBLIOGRAFÍA:

1. Hillman D, Mitchell S, Streatfeild J, Burns C, Bruck D, Pezzullo L. The economic cost of inadequate sleep. *Sleep* 2018;41. Disponible en: <https://doi.org/10.1093/sleep/zsy083>.
2. Mohit B, Cohen JT. Trends of cost-effectiveness studies in sleep medicine. *Sleep Med* 2019;53:176-80. Disponible en: <https://doi.org/10.1016/j.sleep.2018.06.001>.
3. He K, Kim R, Kapur VK. Home- vs. Laboratory-Based Management Of OSA: An Economic Review. *Curr Sleep Med Reports* 2016;2:107-13. Disponible en: <https://doi.org/10.1007/s40675-016-0042-3>.
4. Kundel V, Shah N. Impact of Portable Sleep Testing. *Sleep Med Clin* 2017;12:137-47. Disponible en: <https://doi.org/10.1016/j.jsmc.2016.10.006>.
5. Gong F, Chen X, Wu Y, Yao D, Xie L, Ouyang Q, et al. Nurse vs. physician-led care for obstructive sleep apnoea: A systematic review and meta-analysis of randomized trials. *J Adv Nurs* 2018;74:501–6. <https://doi.org/10.1111/jan.13346>.
6. Wickwire EM, Albrecht JS, Towe M, Abariga SA, Díaz-Abad M, Shipper AG, et al. The Impact on Monetized Health Economic Outcomes of Treatments for OSA. *Chest* 2019;155(5):947-61. Disponible en: <https://doi.org/10.1016/j.chest.2019.01.009>.
7. Aurora RN, Collop NA, Jacobowitz O, Thomas SM, Quan SF, Aronsky AJ. Quality measures for the care of adult patients with obstructive sleep apnea. *J Clin Sleep Med* 2015;11:357-83. Disponible en: <https://doi.org/10.5664/jcsm.4556>.
8. Léger D, Stepnowsky C. The economic and societal burden of excessive daytime sleepiness in patients with obstructive sleep apnea. *Sleep Med Rev* 2020;51:101275 <https://doi.org/10.1016/j.smr.2020.101275>
9. Lyons MM, Bhatt NY, Pack AI, Magalang UJ. Global burden of sleep-disordered breathing and its implications. *Respirology* 2020;25(7):690-702. <https://doi.org/10.1111/resp.13838>
