# Supplementary material
Source: Elsevier journal article supplement (https://www.sciencedirect.com/science/article/pii/S0300289621004099)
Supplement: mmc20 [file S0300289621004099:mmc20.pdf]

### 6.3. Rol de los pacientes

**Editor:** Josep María Montserrat. Unidad Multidisciplinar de Patología del Sueño y VNID, Servei Pneumologia, Institut Clínic Respiratori, Hospital Clínic, Barcelona, España; Universidad de Barcelona, Barcelona, Centro de Investigación Biomédica en Red de Enfermedades Respiratorias (CIBERES), Madrid, España.

**Carmen Monasterio Ponsa.** Unidad Multidisciplinar del Sueño. Hospital Universitario de Bellvitge. Instituto de Investigación Biomédica de Bellvitge (IDIBELL). Barcelona.

El enfoque de la medicina del sueño ha cambiado radicalmente en los últimos años en cuanto al manejo de la apnea obstructiva del sueño (AOS). Si bien en los años 80 el reto se centraba en el acceso al diagnóstico y existían escasas posibilidades de tratamiento, en la actualidad el reto se dirige al manejo como enfermedad crónica, y en este apartado es imprescindible un abordaje de atención centrada en el paciente.

En 2001, el Instituto de Medicina de EE.UU. publicó un informe que marcó un punto de inflexión, en el que se solicitaba el rediseño del sistema de atención médica de EE.UU. y que involucraba a todas las partes interesadas, incluidos profesionales de la salud, responsables de política sanitaria, gestores, organizaciones médicas y pacientes. La atención centrada en el paciente se incluyó como una de los seis puntos clave. Desde entonces la atención centrada en el paciente se ha convertido en el estándar en EE.UU. y Europa.

Respecto a la AOS, podemos considerar diferentes ámbitos donde aplicar un abordaje de atención centrada en el paciente (**Tabla 1**), y que se están ya llevando a cabo o que serán parte del futuro inmediato (1):

Medicina personalizada: determinar las necesidades específicas de cada paciente para guiar la elección del tratamiento. La AOS es un trastorno heterogéneo. Los factores de riesgo conocidos, como el peso corporal, la distribución de la grasa, la morfología craneofacial, el control ventilatorio y de la vía aérea superior no conducen al desarrollo de la AOS en todos los sujetos. Existe además susceptibilidad individual para padecer las diferentes consecuencias clínicas y cardiovasculares. Decidir tratar o no a un paciente y elegir la mejor opción de tratamiento depende de saber quién está en riesgo y quién se beneficia de los diferentes tratamientos, y esta información hoy en día aún no es completa. La genética de la AOS es compleja y los biomarcadores clínicamente útiles todavía no están disponibles. Se ha incrementado el interés por comprender los diferentes fenotipos de AOS para predecir los resultados y personalizar las decisiones de tratamiento, tanto fenotipos clínicos, fisiopatológicos como polisomnográficos. En un futuro, todo este conocimiento permitirá individualizar mejor las decisiones en cada paciente concreto. Mientras tanto, y también entonces, cuando no haya un tratamiento

claramente superior basado en el conocimiento científico disponible habrá que tener en cuenta también que los pacientes tienen derecho a participar en la toma de decisiones.

Toma de decisiones compartida con el paciente. Los valores, preferencias y expectativas de los pacientes impactan sobre la elección del tratamiento y la adherencia al mismo, y por ello es imprescindible tenerlos en cuenta para una toma de decisiones compartida. Los factores psicológicos también pueden influir en los resultados del tratamiento. Por ello se están desarrollando modelos como el biopsicosocial, que tiene en cuenta factores no solo biológicos, sino también psicológicos y sociales para mejorar la adherencia al tratamiento con presión positiva continua en las vías respiratorias (CPAP). El modelo de creencias sobre la salud propone que un paciente actuará según las creencias que tenga sobre la severidad de su enfermedad, las posibles consecuencias si no se trata, los beneficios si se trata y las dificultades que les suponga el tratamiento. Por ello, modelos como el de “mejora motivacional” proponen mejorar la adherencia de los pacientes con programas más que educativos propiamente, participativos, que maximicen cambios de comportamiento, con resultados que parecen positivos.

Las preferencias de los pacientes se están incorporando cada vez más en la evaluación de los resultados de los estudios como una medida importante a tener en cuenta.

Los conocimientos sobre salud en general y la habilidad para entender la información médica son necesarios para tomar decisiones adecuadamente. En un estudio poblacional reciente se demostró por ejemplo que un nivel de conocimientos bajo en salud se asociaba con AOS no diagnosticada. Falta por analizar cómo esto mismo impacta en la adherencia al tratamiento, pero es de sentido común que así sea.

Mejorar la educación y el soporte a los pacientes para mejorar la adherencia. La CPAP sigue siendo el tratamiento más eficaz, pero las diferencias en adherencia son remarcables. Ya en 2014 una revisión Cochrane analizó el efecto de las intervenciones educativas, de soporte y conductuales en los pacientes con SAHS moderado-severo sobre el cumplimiento de CPAP, encontrando que las tres conseguían mejoras en el mismo. Algunos estudios sugieren que pueden conseguirse mejores resultados incluyendo, además del paciente, a su pareja. Un estudio analizó también el uso de “compañeros expertos” o “pacientes expertos” para mejorar la adherencia encontrada, mejoría significativa a los 3 meses de seguimiento.

Fomentar el compromiso de los pacientes con su tratamiento. La tecnología y la conectividad están cambiando muchos aspectos de nuestras vidas y también la manera cómo los pacientes acceden a la información sanitaria y toman el control de su salud. Ello se demuestra en el número creciente de consultas médicas en portales y el uso de aplicaciones móviles para controlar la salud. Es muy común el uso de aplicaciones sobre sueño y dispositivos portátiles para la monitorización de sueño, pero el problema es que la mayoría no están aún validados. Por ejemplo, un estudio analizó la concordancia de

una app comercializada con polisomnografía (PSG) y la concordancia sueño-vigila fue del 85%, pero solo del 45% en las fases del sueño.

La capacidad de los dispositivos de CPAP para registrar datos sobre el uso, eficacia, fuga y otros parámetros ha transformado el manejo de pacientes que realizan CPAP. Estos datos pueden obtenerse ahora de una manera fiable, en tiempo real y compartirse con los pacientes. Los datos pueden registrarse en una tarjeta de memoria o ser transferidos a bases de datos en la nube a través de cable ethernet, red wifi doméstica, conexión bluetooth o conexión celular, permitiendo un acceso remoto. Esto facilita el acceso a la información a los diferentes integrantes del equipo que atiende al paciente, y abre grandes posibilidades de mejora teórica de los resultados (que se analizan en otro capítulo). Pero también permite el acceso al propio paciente. La participación de los pacientes parece además uno de los puntos clave. Un estudio de 138 pacientes con AOS al menos leve recientemente diagnosticados, aleatorizado para acceso a la web, acceso a la web más incentivo económico o atención habitual, encontró que los pacientes que tuvieron acceso a sus propios datos aumentaron la adherencia de CPAP al cabo de 1 semana ( $6,3 \pm 2,5$  h) en comparación con los pacientes que no lo tuvieron ( $4,7 \pm 3,3$  h), y esta diferencia se mantuvo durante los 90 días del estudio ( $5,0 \pm 3,0$  h frente a  $3,8 \pm 3,3$  h). Curiosamente, la suma de un incentivo económico no aumentó la adherencia, sugiriendo que el uso de CPAP fue principalmente relacionado con la motivación intrínseca.

La telemedicina tiene pues el potencial de mejorar el acceso a la atención, así como la participación del paciente. Esta participación puede amplificar además la disponibilidad de datos relevantes para la investigación (análisis de *big-data*), lo cual es de elevado interés para el avance del conocimiento.

Optimizar la coordinación y la continuidad de la atención y el acceso a la misma. La guía de la American Academy of Sleep Medicine (AASM) de 2009 para la apnea obstructiva del sueño recomendó que se abordara la AOS como una enfermedad crónica que requiere un manejo multidisciplinario a largo plazo (2). La coordinación y organización entre los diferentes niveles asistenciales son imprescindibles para un manejo adecuado de los pacientes en todas las fases de su enfermedad, promoviendo que los pacientes con patología más simple puedan ser atendidos mayormente por la medicina primaria y los más complejos por las unidades de sueño multidisciplinarias, y sobre todo que el paciente sea el centro del tratamiento y haya una buena coordinación entre los diferentes niveles asistenciales involucrados.

Hay que tener en cuenta que dentro de la consideración de la AOS como enfermedad crónica el abordaje integral de la enfermedad debe centrarse no solo en programas de adherencia a CPAP si el paciente recibe dicho tratamiento, sino en el manejo integral de los factores de riesgo para la enfermedad y las comorbilidades asociadas (Tabla 2). Los pacientes con AOS a menudo tienen múltiples comorbilidades asociadas, por lo que un planteamiento racional del manejo de la enfermedad debería incluir la coordinación

con los programas de manejo de otras enfermedades crónicas en la mayoría de los casos a través del médico de atención primaria. Considerando la AOS como una enfermedad crónica, se han identificado elementos vinculados a la patología que requerirían atención continua y deberían estar incluidos en el plan estratégico del tratamiento de la AOS (3):

1. Educación del paciente en hábitos de vida saludable. Dar consejo para evitar factores y explicaciones de los beneficios potenciales del tratamiento de la AOS, así como de potenciales complicaciones en caso de no tratar la enfermedad.

2. Elección y adaptación del tratamiento específico para cada paciente según los síntomas, las comorbilidades asociadas y la severidad de la enfermedad. Según la guía clínica de la Academia Americana del Sueño todos los pacientes con AOS deben hacer un seguimiento a largo plazo para su enfermedad crónica. Aquellos pacientes con tratamientos crónicos como CPAP y dispositivo de avance mandibular deben tener un control regular para monitorizar la adherencia al tratamiento, los efectos secundarios, el desarrollo de complicaciones médicas asociadas al propio SAHS y la resolución de los síntomas. Aquellos pacientes con AOS resuelto bien con cirugía o pérdida de peso deben hacer seguimiento para monitorizar la modificación de los factores de riesgo y valorar una posible reaparición de síntomas.

3. Detección y tratamiento inicial de las comorbilidades asociadas. Los pacientes con AOS se presentan a menudo en el momento del diagnóstico con factores de riesgo cardiovascular. Esto hace que estos pacientes con múltiples enfermedades crónicas se enfrenten a numerosos desafíos para el manejo de sus enfermedades como el tratamiento con múltiples fármacos, numerosas visitas médicas y realización de pruebas, y el coste que puede suponer la adquisición de parte del tratamiento, así como el impacto en su vida laboral o en la de la familia. Por lo tanto, el manejo racional de la AOS incluiría la coordinación con el tratamiento de procesos crónicos del mismo paciente, y parece implícita la necesidad de un manejo multidisciplinario del paciente, incluyendo dietistas, psicólogos, fisioterapeutas, cardiólogos, cirujanos, técnicos de sueño y especialista en medicina del sueño.

Evaluación de resultados centrados en el paciente. Un paso más en el papel de los pacientes es tener en cuenta su opinión en la investigación. Para que la investigación se centre en el paciente, los resultados que son importantes para los pacientes deben evaluarse. En ese sentido hay diferentes iniciativas en marcha principalmente en Estados Unidos.

En 2010 se estableció el Instituto de Investigación de Resultados Centrado en el Paciente (*The Patient-Centered Outcomes Research Institute*, PCORI) con el objetivo de crear una red de redes de investigación para fomentar la investigación centrada en el paciente. Los pacientes tienen un papel integral en todo el proceso de investigación, incluyendo la identificación de preguntas de investigación, diseño del estudio e implementación, y disseminación de la información. El uso de portales en línea facilita la

educación y el libre intercambio de ideas y sirve también para facilitar la explotación de los datos aportados por los pacientes.

Ejemplos de estas iniciativas ya en marcha son SAPCON (*Sleep Apnea Patient-Centered Outcomes Network*) (4), que incluye pacientes, clínicos, investigadores y otras participantes. Su cara pública es MyApnea.org. Otro ejemplo es SMART DOCS (*Sustainable Methods, Algorithms, and Research Tools for Delivering Optimal Care Study*) (5), donde un centro único promueve un estudio aleatorio, de dos brazos, para estudiar a largo plazo la efectividad de un enfoque centrado en el paciente comparado con el manejo habitual. Las características del abordaje centrado en el paciente incluyen el uso de cuestionarios estandarizados, uso de tecnología novedosa, cogestión con atención primaria, integración de los diferentes miembros de los equipos multidisciplinarios de sueño para proporcionar educación y apoyo, e intercambio de información ágil paciente-proveedor a través de un portal web fácil de entender. Los resultados con este enfoque pueden dar información sorprendente que no obtendríamos de otra manera<sup>6</sup>.

**Tabla 1.** Medicina centrada en el paciente en la apnea obstructiva del sueño (AOS)

| <b>Ámbito</b>                                                                                      | <b>Aproximación en AOS</b>                                                                                                                                                                                                                                      |
|----------------------------------------------------------------------------------------------------|-----------------------------------------------------------------------------------------------------------------------------------------------------------------------------------------------------------------------------------------------------------------|
| Medicina personalizada                                                                             | Fenotipos fisiológicos<br>Fenotipos polisomnográficos<br>Fenotipos clínicos                                                                                                                                                                                     |
| Valores, preferencias y otros factores del paciente que afectan a la toma de decisiones compartida | Preferencias del paciente<br>Factores psicológicos del paciente<br>Creencias y expectativas de los pacientes<br>Formación en salud del paciente<br>Ayudas en la toma de decisión                                                                                |
| Educación y soporte al paciente                                                                    | Programas educativos del centro del sueño<br>Programas de apoyo del centro del sueño<br>Programas conductuales de medicina del sueño<br>Especialista frente a atención no especializada<br>Apoyo familiar/cuidador/pareja<br>Apoyo de los “compañeros expertos” |

|                                                  |                                                                                                                                                                                                                                                   |
|--------------------------------------------------|---------------------------------------------------------------------------------------------------------------------------------------------------------------------------------------------------------------------------------------------------|
| Compromiso del paciente                          | <p>Aplicaciones y tecnología portátil</p> <p>Portales de pacientes y proveedores</p> <p>Acceso del paciente a la telemonitorización del tratamiento</p> <p>Foros de pacientes y asociaciones</p>                                                  |
| Coordinación, continuidad y acceso a la atención | <p>Centro del sueño como referente de medicina centrada en el paciente</p> <p>Equipos multidisciplinarios de atención</p> <p>Participación de la atención primaria</p> <p>Pruebas domiciliarias</p> <p>Telemedicina: sincrónica y asincrónica</p> |
| Resultados centrados en el paciente              | <p>Medidas de resultados reportados por el paciente</p> <p>Investigación de resultados centrada en el paciente</p>                                                                                                                                |

Modificado de Hilbert et al. (1).

**Tabla 2.** Elementos vinculados a la apnea obstructiva del sueño (AOS) que requieren atención continuada

| <b>Elementos vinculados a los pacientes con AOS</b>                                                           | <b>Potenciales intervenciones a incluir en un programa de manejo de la AOS como enfermedad crónica</b>                                        |
|---------------------------------------------------------------------------------------------------------------|-----------------------------------------------------------------------------------------------------------------------------------------------|
| <p>Enfermedades cardiovasculares, diabetes</p> <p>Diabetes mellitus tipo 2 y otras comorbilidades médicas</p> | <p>Coordinación con programas de manejo de otras enfermedades crónicas a través de atención primaria o del médico responsable del proceso</p> |
| Obesidad                                                                                                      | <p>Modificar el estilo de vida: dieta, ejercicio</p> <p>Tratamiento farmacológico</p> <p>Cirugía</p>                                          |

|                                                                                 |                                                                                                                                                                                                                                                                                                         |
|---------------------------------------------------------------------------------|---------------------------------------------------------------------------------------------------------------------------------------------------------------------------------------------------------------------------------------------------------------------------------------------------------|
| Consumo de alcohol excesivo                                                     | <p>Cribado del riesgo de consumo elevado con escalas o tests</p> <p>Intervenciones menores básicas (consejo de disminuir el consumo, estrategias para el cambio, importancia y necesidad de cambio del hábito)</p> <p>Remitir al paciente a centros especializados en deshabituación</p>                |
| Tabaco                                                                          | <p>Remitir al paciente a centros para deshabituación</p> <p>Tratamiento farmacológico</p>                                                                                                                                                                                                               |
| Baja adherencia a CPAP                                                          | <p>Estrategias de soporte que fomenten la adherencia y educación al inicio de CPAP</p> <p>Considerar alternativas terapéuticas</p>                                                                                                                                                                      |
| Somnolencia residual y déficits neurocognitivos a pesar de tratamiento con CPAP | <p>Valorar potenciales razones y diagnósticos alternativos o comorbilidades (fragmentación del sueño por la propia CPAP, baja adherencia a la CPAP, otros trastornos del sueño, privación crónica del sueño, trastornos del estado de ánimo, medicaciones sedantes, obesidad, comorbilidades, etc.)</p> |
| Depresión                                                                       | <p>Cribado con escala de ansiedad y depresión</p> <p>Remitir al paciente al centro de salud mental</p> <p>Tratamiento farmacológico</p> <p>Psicoterapia</p>                                                                                                                                             |

CPAP: presión positiva continua en las vías respiratorias.

Modificado de Masdeu et al. (3).

## BIBLIOGRAFÍA:

1. Hilbert J, Yaggi HK. Patient-centered care in obstructive sleep apnea: a vision for the future. *Sleep Med Rev* 2018;37:138-47.
2. Epstein LJ, Kristo D, Strollo PJ, Jr., Friedman N, Malhotra A, Patil SP, et al. Clinical guideline for the evaluation, management and long-term care of obstructive sleep apnea in adults. *J Clin Sleep Med* 2009;5:263-76.
3. Masdeu MJ, Vigil L, Ramírez E, González D. Patología del sueño: enfermedad crónica y tratamiento integral. En: *Patología Básica del sueño*. Elsevier, 2015.
4. Redline S, Baker-Goodwin S, Bakker JP, Epstein M, Hanes S, Hanson M, et al. Sleep Apnea Patient-centered Outcomes. Patient partnerships transforming sleep medicine research and clinical care: perspectives from the sleep apnea patient-centered outcomes network. *J Clin Sleep Med* 2016;12(7):1053-8.
5. Kushida CA, Nichols DA, Holmes TH, Miller R, Griffin K, Cardell CY, et al. SMART DOCS: a new patient-centered outcomes and coordinated-care management approach for the future practice of sleep medicine. *Sleep* 2015; 38(2):315-26.
6. Kapur V, Johnston J, Rueschman M, Bakker J, Donovan L, Hanson M et al. Patient satisfaction with sleep study experience: findings from the Sleep Apnea Patient-Centered Outcomes Network SLEEPJ, 2018, 41 (8):1–7. doi: 10.1093/sleep/zsy093
