# Supplementary material
Source: Elsevier journal article supplement (https://www.sciencedirect.com/science/article/pii/S0300289621004099)
Supplement: mmc21 [file S0300289621004099:mmc21.pdf]

## 6.4. Control de calidad

**Editor:** Josep María Montserrat. Unidad Multidisciplinar de Patología del Sueño y VNID, Servei Pneumologia, Institut Clínic Respiratori, Hospital Clínic, Barcelona, España; Universidad de Barcelona, Barcelona, Centro de Investigación Biomédica en Red de Enfermedades Respiratorias (CIBERES), Madrid, España.

**Carmen Monasterio Ponsa.** Unidad Multidisciplinar del Sueño. Hospital Universitario de Bellvitge. Instituto de Investigación Biomédica de Bellvitge (IDIBELL). Barcelona.

La organización de las unidades de sueño de diferente complejidad en redes claramente definidas, que engloben los diferentes niveles asistenciales, incluida la medicina primaria, es imprescindible para una buena organización en el manejo de los pacientes con trastornos respiratorios del sueño.

La formación y especialización de los profesionales implicados es pieza clave para asegurar una atención de calidad, así como la acreditación de los centros que participan en estas redes para asegurar unos estándares de calidad.

En países como EE.UU. la medicina del sueño es una subespecialidad independiente, no así en la mayoría de países europeos, incluido el nuestro, donde los profesionales que se dedican al sueño provienen de diferentes especialidades. Por ello la European Sleep Research Society recomendó en 2006 y 2009<sup>1,2</sup> unos estándares para la acreditación de unidades de sueño y también de los profesionales que se dedican al sueño. Incluso en EE.UU., trabajos recientes han demostrado que en pacientes con AOS la acreditación-certificación de los centros de sueño y los médicos se asoció con mejor adherencia a presión positiva continua en las vías respiratorias, mejor educación y mayor satisfacción del paciente, así como mayor agilidad en el diagnóstico<sup>3</sup>.

La Sociedad Española de Neumología y Cirugía Torácica (SEPAR) ha sido la impulsora en los últimos años del desarrollo de una intensa actividad asistencial e investigadora en el campo de los trastornos del sueño. Paralelamente ha fomentado la creación de un sistema de acreditación de centros y de profesionales, en la línea de los estándares europeos para asegurar y fomentar una asistencia de calidad.

En 2009 se desarrolla la fase inicial de **acreditación de las unidades de sueño** propuesta a través del área de sueño, ventilación mecánica y cuidados respiratorios críticos de la SEPAR. En noviembre de 2011 la Agencia de Calidad del Ministerio de Sanidad, en colaboración con las sociedades científicas, publicó un Documento de Estándares y recomendaciones de Calidad y seguridad de la Unidad del Sueño, uno de los primeros de Europa en esta área.

Así, la guía de acreditación de unidades de sueño SEPAR es amplia, flexible, integradora, sujeta a modificaciones en el tiempo y de carácter voluntario. Los objetivos fundamentales son:

- Mejorar el nivel de cuidado a los pacientes, asegurando un marco de calidad asistencial.
- Establecer los recursos y facilitar la gestión de los mismos.
- Impulsar el desarrollo de planes formativos en trastornos del sueño y avanzar en el concepto de “acreditación del conocimiento”.
- Favorecer la colaboración con profesionales de otras disciplinas clínicas en un entorno de cooperación. Es voluntad del Área de SEPAR TS-VM y CC favorecer un proceso de convergencia con la acreditación de unidades impulsada desde el Comité Español de Acreditación de Medicina de Sueño (CEAMS) anteriormente y en la actualidad Federación Española de Sociedades de Medicina del Sueño (FESMES).
- Promover la investigación en los trastornos del sueño.

La SEPAR establece tres niveles de acreditación que no suponen categorías de mayor o menor rango, ya que cada una de ellas puede optar a un grado mayor de calidad, obteniendo el distintivo de excelente. Estas son:

- Las unidades multidisciplinarias de alta complejidad son centros dotados con suficientes recursos materiales y humanos que les capacitan para realizar cualquier tipo de actividad asistencial, docente o de investigación relacionada con la prevención, diagnóstico y el tratamiento de los distintos trastornos durante el sueño, respiratorios o no, tanto en adultos como en niños.
- Las unidades respiratorias son centros de menor complejidad que las unidades multidisciplinarias que disponen de recursos humanos y materiales que les posibilitan proporcionar una atención especializada de alto nivel a los pacientes con trastornos respiratorios durante el sueño, pero que necesitan apoyo complementario o derivación para pacientes con otro tipo de trastornos del sueño. Son centros dispuestos para llevar a cabo actividad asistencial, docente y de investigación en los aspectos relacionados con la prevención, el diagnóstico y el tratamiento de los trastornos respiratorios durante el sueño.
- Las unidades básicas son unidades cuyo responsable es un especialista en neumología, que dedica gran tiempo de su trabajo a la patología respiratoria del sueño, aunque no necesariamente con exclusividad, pero que destaca por esa labor en su centro y que dispone de al menos poligrafía respiratoria, con un nivel suficiente de estudios y pacientes en consulta para mantener un nivel adecuado de experiencia.

En cuanto a los criterios de acreditación, cada centro sanitario podrá optar a la acreditación en cualquiera de los tres niveles descritos. Para alcanzar el nivel deseado se han desarrollado por consenso unos criterios según un baremo. En primer lugar, los denominados criterios evaluables (CE), dentro de los que se distinguen unos requisitos imprescindibles (RI) para poder acceder al nivel solicitado. Por otra parte, existen también unos criterios recomendables (CR). La acreditación de cada nivel se consigue

si se cumplen al menos el 80% de los CE propuestos en cada categoría (incluyendo el 100% de los requisitos imprescindibles). La calidad de cada nivel será excelente si se cumplen que  $(CE + CR) * 100 / (N.º \text{ total de ítems CE} + CR \text{ en el nivel}) = 80\%$ .

Medir los resultados de la asistencia es un elemento crucial para determinar la calidad de la asistencia prestada. Sin embargo, no existe todavía un desarrollo suficiente de indicadores de resultados que sean aceptados y validados de forma general. Junto a ello se encuentra la dificultad de monitorizar externamente estos datos debido a la heterogeneidad de los programas informáticos u otros registros utilizados en los distintos centros hospitalarios de nuestro país. Es por ello que se ha diseñado una escala de baremación buscando una aproximación a una adecuada calidad de la asistencia en sueño de forma indirecta. Se considera fundamental el desarrollo de indicadores de resultados de la asistencia a los pacientes en las distintas unidades definidas y que estos criterios actuales puedan ser objeto de una revisión posterior, una vez que se desarrollen nuevos instrumentos que permitan incorporar otros nuevos indicadores en un futuro.

Por otro lado, es imprescindible la adecuada coordinación entre los distintos niveles de unidades. Para ello todas las unidades deben estar coordinadas con unidades de nivel superior, inferior, o de ambas, según corresponda. Es responsabilidad de la Unidad Multidisciplinar de Sueño de Alta Complejidad tutorizar, supervisar y controlar la calidad de las unidades con ella coordinadas, revisando periódicamente protocolos, criterios de derivación y el adecuado análisis de los estudios. Asimismo, las unidades coordinadas acordarán y unificarán los protocolos y criterios de derivación. La información detallada en cuanto a los requisitos específicos de personal, aparataje, tipos y número de estudios anuales necesarios puede obtenerse directamente en la página web de SEPAR (<http://www.separ.es/node/477>), donde también está publicada la lista de unidades acreditadas (<https://www.separ.es/node/486>).

En cuanto a la **acreditación de personas**, en nuestro país se ha trabajado de forma colaborativa entre las diferentes sociedades implicadas en la patología del sueño para consensuar una acreditación integradora y común que abarque un amplio espectro de trastornos del sueño y no solo enfocada a medicina respiratoria o pediátrica del sueño (4). La medicina del sueño es un campo complejo que requiere una amplia gama de experiencia que es poco probable que un solo médico posea. La creación de equipos multidisciplinarios es el enfoque más prometedor, al facilitar un lenguaje similar y una base compartida por las diferentes especialidades. Por tanto, la opinión general es que el proceso de certificación debe ser el mismo para todas las especialidades dentro de la medicina del sueño para poder garantizar una evaluación clínica precisa y diagnosticar y tratar las patologías del sueño más comunes de igual manera, y a la vez facilitar el manejo de otras enfermedades del sueño menos frecuentes de forma superespecializada.

Así, las principales sociedades científicas médicas involucradas en la medicina del sueño en España han trabajado conjuntamente para crear una acreditación común. Se creó para este fin el Comité Español de Acreditación de Medicina de Sueño (CEAMS), con la participación de la Sociedad Española de Sueño (SES), Sociedad Española de Neumología y Cirugía Torácica (SEPAR), Sociedad Española de Neurología (SEN), Asociación Española de Pediatría (AEP), Sociedad Española de Psiquiatría (SEP) y Sociedad Española de Otorrinolaringología y Patología Cervico-Facial (SEORL-PCF), sin perjuicio de que en un futuro se pudieran incorporar otras sociedades. En 2012 se puso en marcha la Guía SEPAR-CEAMS de acreditación de Medicina del Sueño, destinada a la acreditación de personas para alcanzar el grado de Experto en Medicina de Sueño, de tal manera que puede optarse anualmente a dicha acreditación desde distintas especialidades implicadas.

En 2016 se constituyó una nueva entidad jurídica, la Federación Española de Sociedades de Medicina del Sueño (FESMES), que está integrada actualmente por la Sociedad Española de Sueño (SES), la Sociedad Española de Neumología y Cirugía Torácica (SEPAR), la Sociedad Española de Psiquiatría (SEP), la Sociedad Española de Otorrinolaringología y cirugía de cabeza y cuello (SEORL CCC), la Sociedad Española de Neurología (SEN), y la Sociedad Española de Medicina Dental del Sueño (SEMDeS) y cuya principal función, además de proporcionar formación, es unificar los procesos de acreditación de los médicos y de los centros especializados en medicina de sueño en España y en algunos países de Latinoamérica. La FESMES solicitó a la Sociedad Europea de Investigación de Sueño (ESRS) la homologación del sistema de certificación de profesionales y centros, con lo que España se convertirá en el primer país europeo que reciba dicha homologación.

La primera acreditación de personas tuvo lugar en 2013, y se ha repetido anualmente hasta 2018. Para optar a la misma se requiere a los candidatos 10 años de experiencia en medicina del sueño y cumplir otra serie de requisitos previos. En segundo lugar, deben asistir a un curso de 3 días (12 h por día) en el que se analizan las principales enfermedades y procedimientos del sueño, incluyendo conocimiento teórico, discusión de casos y una sesión práctica. Finalmente, los candidatos deben aprobar un examen con una sección tanto teórica como práctica. Algunos meses antes del curso, los participantes reciben una lista cuidadosamente seleccionada de artículos revisados recientemente sobre las diferentes patologías del sueño y procedimientos.

Un aspecto importante del proceso de evaluación es el curso de 3 días en el que los médicos interactúan con sus compañeros en un entorno amigable y de soporte, y que claramente ayuda a estandarizar el manejo del paciente. El examen contiene 40 preguntas teóricas sobre todas las áreas de medicina del sueño y el examen práctico consta de dos partes: primero, 10 preguntas sobre los rastros típicos de una polisomnografía completa, y luego la conexión de una serie de sensores para polisomnografía o algunos ajustes de ventilación mecánica.

Además, en el año 2017 se realizó también el **primer curso de acreditación para técnicos en medicina de sueño**, en la línea de las certificaciones europeas, para promover la calidad y la certificación del personal no médico que trabaja en las unidades, y cuya competencia es de suma importancia en los equipos de las unidades. Finalmente, en 2020 se realizó también la primera certificación de **Experto en Medicina Dental del Sueño** para odontólogos y estomatólogos, incorporados más recientemente a FESMES.

## **BIBLIOGRAFÍA:**

1. Steering committee of the European sleep research society. European guidelines for the accreditation of Sleep Medicine Centers. J Sleep Res 2006;15:231-8. doi: [10.1111/j.1365-2869.2006.00524.x](https://doi.org/10.1111/j.1365-2869.2006.00524.x).
2. ESRS task force: Pevernagie D, Stanley N, Berg S, Krieger J, Amici R, Bassetti C, et al. European guidelines for the certification of professionals in sleep medicine: report of the task force of the European Sleep Research Society Sleep Res 2009;18:136-41. doi: [10.1111/j.1365-2869.2008.00721.x](https://doi.org/10.1111/j.1365-2869.2008.00721.x).
3. Parthasarathy S, Subramanian S, Quan SF. A Multicenter Prospective Comparative Effectiveness Study of the Effect of Physician Certification and Center Accreditation on Patient-Centered Outcomes in Obstructive Sleep Apnea. J Clin Sleep Med 2014;10(3):243-9. doi: 10.5664/jcsm.3518
4. Montserrat JM, Terán-Santos J, Puertas J. Sleep medicine certification for physicians in Spain. Eur Respir J 2015;45:1189-91. doi: 10.1183/09031936.00188314.
