# Supplementary material
Source: Elsevier journal article supplement (https://www.sciencedirect.com/science/article/pii/S0300289621004099)
Supplement: mmc22 [file S0300289621004099:mmc22.pdf]

Capítulo 7

Función de la enfermería y otros profesionales de la salud implicados en la patología respiratoria del sueño.

**Editor:** Josep María Montserrat. Unidad Multidisciplinar de Patología del Sueño y VNID, Servei Pneumologia, Institut Clínic Respiratori, Hospital Clínic, Barcelona, España; Universidad de Barcelona, Barcelona, Centro de Investigación Biomédica en Red de Enfermedades Respiratorias (CIBERES), Madrid, España.

**M. Concepción Ruiz.** Enfermera de Práctica Avanzada. Servicio Neumología. Unidad del Sueño Hospital Clínic Barcelona

**Onintza Garmendia.** Fisioterapeuta. PhD. Unidad del Sueño. Servicio de Neumología. Hospital Clínic. Barcelona.

**Nerea Zabala.** RN. Psy. MSc. Experto Técnicas Sueño. Unidad del Sueño. Hospital Universitario Cruces. Bizkaia.

1. INTRODUCCIÓN

A través de este documento se reconoce que la enfermería (EF) y otros profesionales de la salud (PS) como fisioterapeutas, entre otros, deberían tener un papel relevante en diferentes aspectos de la atención a pacientes con patología respiratoria del sueño como el tratamiento y seguimiento, así como en el manejo de la patología general del sueño. Además, al igual que los técnicos de sueño (TS), pueden realizar estudios del sueño simples como la oximetría, la poligrafía respiratoria, la titulación de presión positiva continua en las vías respiratorias (CPAP) domiciliarias o incluso estudios técnicamente más complejos como la polisomnografía (PSG) en el ámbito de una unidad de sueño<sup>1-4</sup>. El punto básico es si existe una preparación adecuada (acreditación). En este sentido la Federación Española de Medicina de Sueño (FESMES) reconoce estos aspectos citados.

Los profesionales mencionados pueden tener funciones en diversos niveles asistenciales, desde la medicina primaria a las unidades multidisciplinarias de sueño con un grado específico de mayor o menor preparación según la función que vayan a desarrollar<sup>5</sup>. Un aspecto muy importante en EF es el seguimiento con el objetivo de conseguir el empoderamiento del paciente con patología del sueño, en especial la respiratoria (AOS, apnea obstructiva del sueño), que en ocasiones puede precisar la aplicación de CPAP o en los síndromes de hipoventilación que pueden requerir ventilación mecánica no invasiva (VMNI) además de tener un alto grado de morbilidad e incluso mortalidad<sup>4,6,7</sup>. En este sentido es importante considerar al paciente de forma holística para detectar todos los factores que puedan influir en la gestión de su enfermedad cuyo objetivo principal es conseguir un descanso satisfactorio<sup>8</sup>. Este capítulo del documento de consenso no pretende ser un capítulo de un libro, sino un estímulo, y a su vez un planteamiento global posibilista de la función de EF, PS y los TS tal como muestra la figura 1.

Tal como se ha mencionado diversos estudios muestran que la EF y otros PS pueden tener una función mucho más amplia, además del seguimiento, en la gestión de los pacientes con AOS o los que precisan VMNI (Figura 1)<sup>7,9-11</sup>, aunque obviamente será necesario tener un grado de formación adecuado<sup>12,13</sup>, integración en el grupo multidisciplinario e idealmente ser personal de práctica avanzada. Este capítulo se basa en 3 conceptos fundamentales para una adecuada práctica clínica: 1) CONOCER aspectos básicos de todas las funciones que se realizan en la gestión de los pacientes, 2) ENTENDER la mayoría de ellos con capacidad de comentarlos y, finalmente, 3) REALIZARLOS y discutirlos en los casos en que sea su trabajo habitual.

**Figura 1.** Gestión global de los sujetos con patología respiratoria del sueño atendiendo a los diferentes niveles profesionales, en especial, en aquellos con apneas obstructivas durante el sueño (AOS). En el apartado 3 debe considerarse que el flujo de atención depende de las características de cada grupo de trabajo. Sería lógico que tras la visita del médico de primaria el médico especialista decidiera la conducta a seguir, tratamiento general o remitir al centro

más pertinente para estudio. En un futuro con las nuevas tecnologías es posible que los especialistas puedan hacer aproximaciones diagnósticas precisas. HTA: hipertensión arterial.

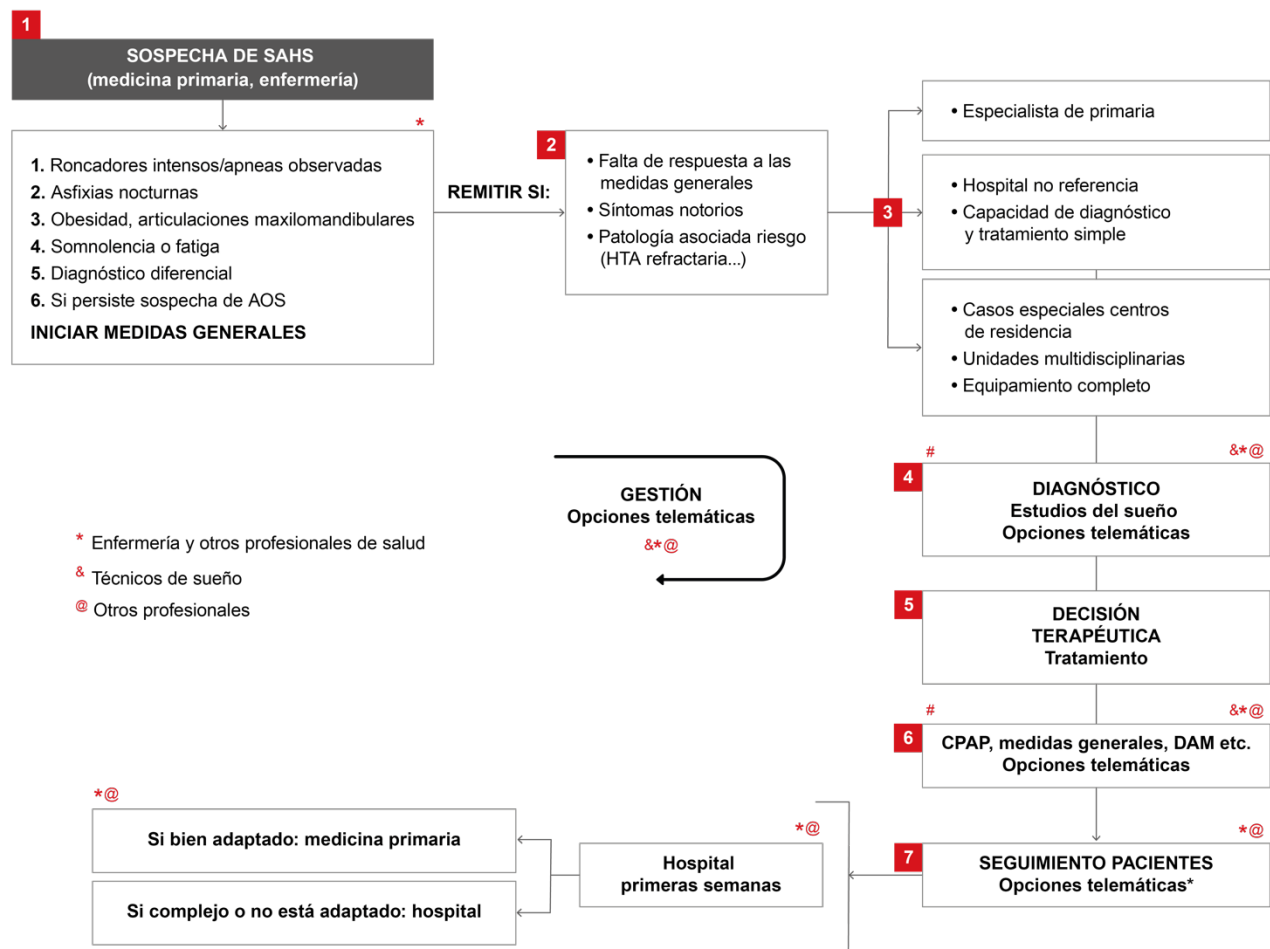

2. CONOCER

A modo de listado son los siguientes:

2.1. Respecto a la enfermedad

- 1. Cuestionarios de cribaje, diario de sueño, seguimiento y estrategias globales<sup>7,9,10,14,15</sup>.
- 2. Los equipamientos para realizar estudios de sueño, mascarillas y complementos, actigrafías, test de latencia y mantenimiento de la vigilia<sup>1-3</sup>. Oximetrías y gasometrías.
- 3. Equipos de CPAP, (presión positiva continua) y BiPAP o ventiladores (presiones intermitentes) además de la telemedicina<sup>16-20</sup>.
- 4. Diferentes aspectos del seguimiento de los pacientes<sup>21,22</sup>.
- 5. Conocer comorbilidades asociadas<sup>23-25</sup>.

2.2. En relación con las habilidades, es importante<sup>26-29</sup> tener en cuenta los siguientes puntos:

- 1. Poseer empatía y capacidad de trabajar en grupo.
- 2. Habilidad para gestionar grupos de pacientes.
- 3. Poder detectar problemas relacionados con las propias patologías del sueño o las entidades asociadas.

3. ENTENDER

Este apartado implica un mayor grado de conocimiento y en consecuencia capacitación para entender funciones más complejas.

3.1. Estudios del sueño (diagnóstico/codificación)<sup>30,31</sup>

3.1.1. La **polisomnografía convencional** que agrupa: 1) variables neurológicas para conocer el sueño (tiempo y características: EEG, EOG y EMG). 2) variables respiratorias para conocer y valorar la presencia de trastornos respiratorios (flujo nasal/boca, banda torácica y abdominal, oximetría y sensor de posición corporal) y 3) sensores para detectar movimiento de piernas, el ECG y el ronquido) (Figura 2)<sup>32</sup>. En este caso se observan frecuentes apneas obstructivas, dado que juntamente con un cese de flujo existe movimiento toracoabdominal.

**Figura 2.** Polisomnografía.

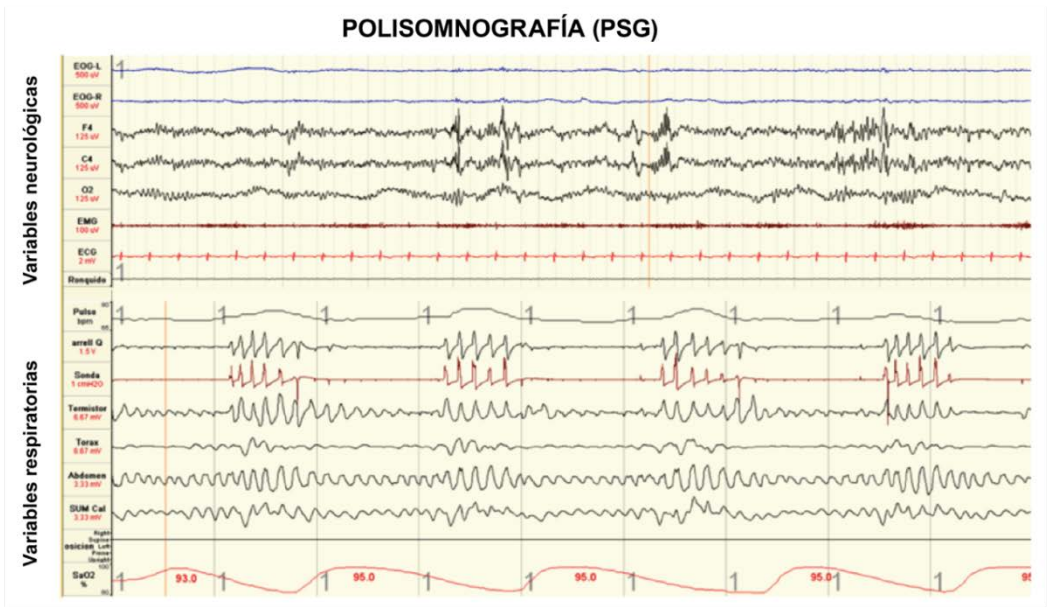

3.1.2. La **poligrafía Respiratoria**. Estudio del sueño que usa únicamente variables respiratorias. Es muy útil para el diagnóstico de sujetos con alta probabilidad de padecer apneas obstructivas durante el sueño (Figura 3).

**Figura 3.** Poligrafía Respiratoria

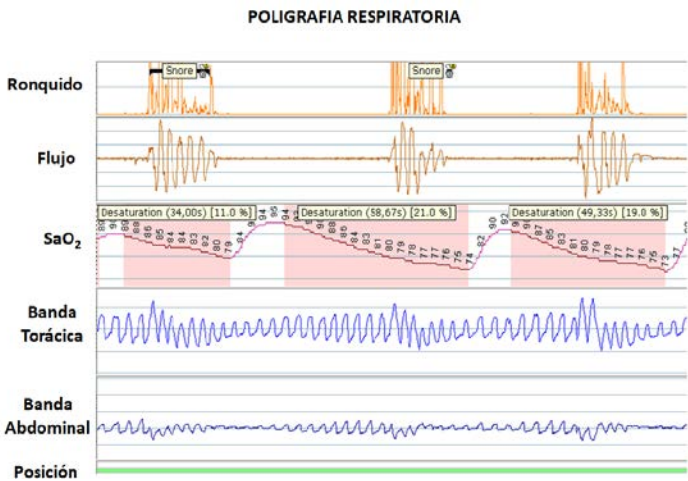

3.1.3 Oximetría

Es muy importante saber valorar la gráfica visualmente, evaluar el índice de desaturaciones >3% (ID 3%), que es bastante específico de AOS, y el CT 90% (% de tiempo con una SatO<sub>2</sub> <90% la señal de pulsioximetría), que no es específico de AOS. Se debe tener en cuenta que cuanto más simplificado es un estudio, mejor debe ser la valoración clínica del paciente y la preparación del personal.

3.2. Equipos de presión positiva<sup>16-18,33</sup>

Tal como puede verse en la figura 4 los elementos que componen y la forma de funcionamiento de los equipos de CPAP son los siguientes:

- 1. Un generador de flujo (rotor).
- 2. Una fuga.
- 3. Una mascarilla.

El rotor genera un flujo que, teniendo en cuenta la resistencia de la mascarilla (la fuga en si misma es fija), presuriza el sistema. Cuando aumenta la velocidad del rotor aumenta la presión dentro del sistema. Además, la fuga permite que el aire espirado salga para evitar la reinhalación.

**Figura 4:** Aspectos básicos de un sistema presión.

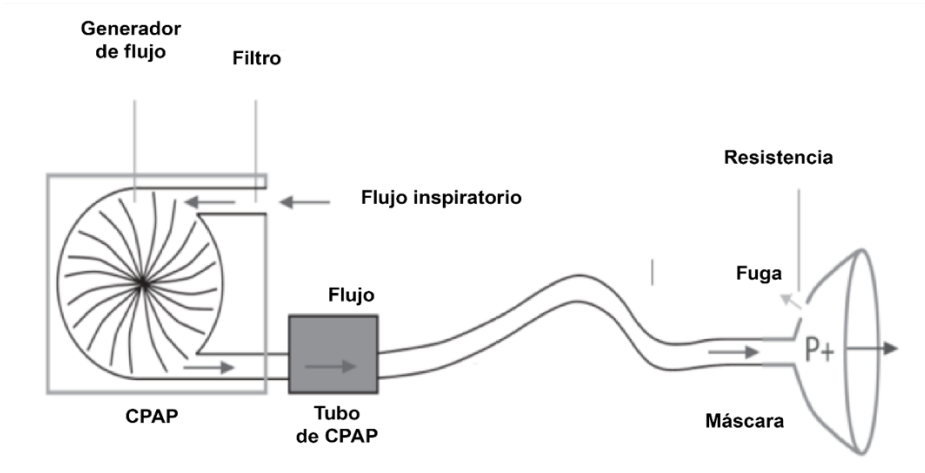

Si el rotor gira continuamente se genera una presión continua o sea CPAP. En cambio, si genera un flujo intermitente la presión es también intermitente, es decir, un ventilador, tal y como se muestra en la figura 5.

**Figura 5:** Presión fija parte superior (CPAP). Presión intermitente parte inferior (BiPAP y ventilación mecánica).

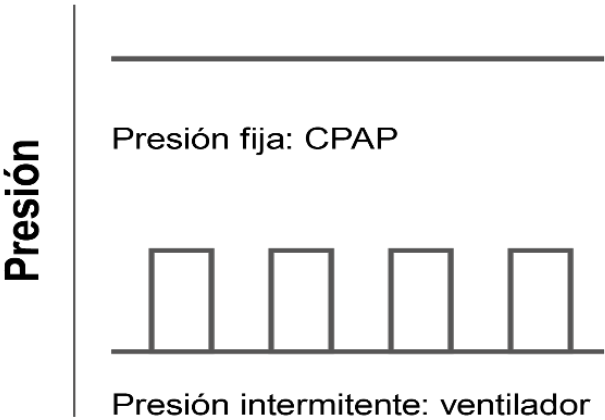

### 3.3 Educación y seguimiento de los pacientes<sup>16,22</sup>

Existen 3 fases muy importantes: 1. la educación y entrenamiento antes de iniciar el tratamiento con CPAP, que puede hacerse en grupo o individual. 2. la titulación de la presión de la CPAP es fundamental para conseguir una presión de CPAP adecuada. 3. el seguimiento inicialmente a corto plazo, entre las 2 y 6 semanas, período en que se producen los principales efectos secundarios y que si se resuelven adecuadamente este control determina el futuro éxito en el cumplimiento<sup>21,22</sup>. Hay que tener en cuenta que en la actualidad existen excelentes CPAP automáticas que no precisan titulación.

### 3.4. Telemedicina<sup>20</sup>

Los equipos de CPAP pueden emitir, gracias a un módem 4G o wifi, desde el propio equipo vía internet señales que a través de una plataforma permiten evaluar su comportamiento. Concretamente las señales que se consideran son las relacionadas con el cumplimiento del

tratamiento, la presencia o no de fugas, nivel de presiones y los episodios residuales. Esta es una forma de control a distancia que evita desplazamientos del sujeto y favorece la adaptación del paciente a la terapia.

4. REALIZAR

Este punto siempre implica formación continuada más intensa, trabajar en el contexto de un grupo multidisciplinario e idealmente ser un profesional de práctica avanzada. A efectos didácticos se expondrán una serie de aspectos orientativos que de alguna manera implican como se ha citado práctica avanzada e idealmente una acreditación.

4.1. Cribaje inicial, primera visita (educación, entreno), titulación y seguimiento<sup>10,14,15</sup>

4.1.1 Cribaje

El objetivo es detectar pacientes con AOS, así como realizar un diagnóstico diferencial para remitir al paciente adecuadamente. Son pacientes roncadores con apneas observadas o asfixias nocturnas que aquejan somnolencia o fatiga. Son habitualmente obesos o con anomalías maxilo-mandibulares o cuello ancho (Figura 1). Existen cuestionarios muy útiles como el STOP-BANG para valorar la posibilidad de padecer un AOS o el cuestionario de Epworth para valorar la somnolencia. En un segundo lugar hay que tener nociones básicas de las otras patologías del sueño tal como se muestran en la figura 6. Es necesario tener en cuenta conceptos de sueño y salud.

Figura 6. Otras patologías o circunstancias en relación a la patología del sueño.

Horas de sueño    Laborables: \_\_\_\_\_    Festivos: \_\_\_\_\_

|                                                       |                             |                             |
|-------------------------------------------------------|-----------------------------|-----------------------------|
| ¿Bruscas pérdidas de tono muscular (cataplejía)?      | Sí <input type="checkbox"/> | No <input type="checkbox"/> |
| ¿Ánimo bajo/irritabilidad?                            | Sí <input type="checkbox"/> | No <input type="checkbox"/> |
| ¿Sonambulismo?                                        | Sí <input type="checkbox"/> | No <input type="checkbox"/> |
| ¿Insomnio?                                            | Sí <input type="checkbox"/> | No <input type="checkbox"/> |
| ¿Necesidad de mover las piernas que mejoran al andar? | Sí <input type="checkbox"/> | No <input type="checkbox"/> |
| ¿Movimientos bruscos por la noche?                    | Sí <input type="checkbox"/> | No <input type="checkbox"/> |
| ¿Convulsiones por la noche?                           | Sí <input type="checkbox"/> | No <input type="checkbox"/> |

Un aspecto útil es que en la fase de cribaje se tengan muy en cuenta las variables antropométricas, pues los síntomas como somnolencia o fatiga son más inespecíficos, pueden ser debidos a otras causas, aunque sí tienen mucho valor para indicación de tratamiento.

4.1.2. Visita inicial

Esta visita debe de hacerse en un ambiente adecuado y el EF u otro PS tiene un rol de educador, ya que desde el momento de la prescripción de la CPAP va a ser la persona de referencia y contacto para dar respuesta y solucionar problemas. Esta visita se puede realizar de forma individual o en grupo. Es importante dar unas explicaciones sencillas y directas (educación en cuidados, higiene del sueño, mantenimiento del dispositivo) y también sobre la enfermedad del sujeto, en concreto:

- 1. El sueño en general y su importancia, explicación sobre la AOS, la CPAP y su funcionamiento, además de las mascarillas y su colocación. El sujeto debe entender la necesidad del tratamiento y que cuanto más tiempo use el equipo, mejor (hay que huir de las 4 h e ir a más de 5,5 h como mínimo). Es aconsejable dejar probar la CPAP durante un tiempo de 1 o 2 h dependiendo del paciente (entreno).



- 2. En esta primera visita también se le explica en qué consistente la titulación y los posibles efectos secundarios de la CPAP, que podrán controlarse con medidas adecuadas aplicadas precozmente.
- 3. Se remarca la importancia de explicar los aspectos de sueño, salud, comorbilidades, además de los conceptos básicos de salud como la alimentación/peso y el ejercicio. Nunca en la educación inicial hay que explicar *únicamente* los aspectos del AOS y su tratamiento.
- 4. Finalmente, se debe explicar el tema de los viajes, el humidificador, otros tratamientos, los datos a distancia que puede remitir el equipo y, finalmente, la importancia de la pareja o familia.

Lo más importante en esta primera toma de contacto es la capacidad de empatizar y persuadir al paciente de la necesidad del tratamiento. Existen vídeos y diversos materiales que se pueden utilizar para familiarizar al paciente con el tratamiento.

4.1.3. Titulación<sup>30,31</sup>

La titulación se puede hacer con PSG o con equipos simplificados en el domicilio. En la mayoría de los casos se debe hacer en el domicilio y reservar las PSG en el hospital para los casos complejos, con comorbilidades notorias o casos especiales como el insomnio o en sujetos con determinadas características personales. En ocasiones, por diversos motivos, no se consiguen eliminar todos los episodios. En estos casos hay que priorizar el confort del sujeto (podría repetirse el estudio si hiciera falta) y valorar los posibles episodios tipo apnea emergente (*complex sleep apnea*).

En la actualidad, las poligrafías respiratorias y las titulaciones domiciliarias son hasta cierto punto fáciles de hacer e interpretar con la preparación adecuada. Las pruebas en un laboratorio del sueño son mucho más complejas y requieren mayor preparación y capacitación<sup>1,15</sup> así como trabajo en grupo<sup>2</sup>. En este sentido, Colvin y cols. (2018)<sup>2</sup> en una carta reciente en el *Journal of Clinical Sleep Medicine*, se plantean: “*Nurse Practitioners (NP) and physician Assistant (Pas) are qualified to Perform Home Sleep Apnea Test Clinical Evaluation*”, la importancia de los profesionales de EF y PS en el manejo global de muchos de los procedimientos y en la gestión de pacientes con patología del sueño.

La titulación implica una serie de puntos a tener en cuenta (Tabla 1). A). Lo que debe de hacerse antes de la titulación: aspectos globales de educación en patología del sueño y entreno. B). La titulación en sí misma y C). El periodo post-titulación inmediato.

**Tabla 1:** Resumen de todo el proceso de titulación.

|                      |                                      |                             |                                |                                          |
|----------------------|--------------------------------------|-----------------------------|--------------------------------|------------------------------------------|
| <b>PRETITULACIÓN</b> | ¿Qué es el sueño?                    | ¿Por qué es muy importante? | ¿Qué pasa si no dormimos bien? | Cuidar nuestro sueño                     |
|                      | Sueño y salud                        | Dormir horas suficientes    | Horarios                       | Trabajo a turnos                         |
|                      | Principales enfermedades del sueño   | ¿Qué es la apnea del sueño? | Opciones terapéuticas          | CPAP                                     |
|                      | Cómo funciona la CPCR                | Aspectos prácticos          | Posibles complicaciones        | Entrenamiento<br>Entrega diario de sueño |
| <b>TITULACIÓN</b>    | Colocación adecuada de la mascarilla | Tranquilizar al paciente    | Subir presiones según          | No pasa nada si se queda con limitación  |

|                       |                                                                          |                                                                        |                                                                          |                                                                                |
|-----------------------|--------------------------------------------------------------------------|------------------------------------------------------------------------|--------------------------------------------------------------------------|--------------------------------------------------------------------------------|
|                       |                                                                          | Entrega de cuestionario a rellenar por la mañana                       | tolerancia, pero no forzar                                               | o algunas apneas (<5-10 h) (concepto <i>happy night</i> )                      |
| PROCESO DE ADAPTACIÓN | Por la mañana, repaso de incidencias y dudas<br><br>Repasar cuestionario | Visita de control a los 15 días, 1 mes y 3 meses ( <i>check list</i> ) | Controlar problemas<br><br>Soporte psicológico<br><br>Control Telemático | Si a los 6 meses todo va bien, remitir primaria<br><br>Valorar diario de sueño |

Por otra parte, hay que saber tal como se ha citado que actualmente las CPAP automáticas representan una alternativa a la titulación convencional. Su esquema básico se muestra en la Figura 7. A través de unos sensores (flujo, ronquido, fuga) se detectan cambios que el equipo procesa y de ahí varía o no el nivel de CPAP. Estos equipos representan un avance, pero como en todos los procedimientos, es preciso entender la tecnología. Si se entiende, se aplica mejor y se optimiza su realización.

**Figura 7.** Esquema básico de una presión positiva continua en las vías respiratorias (CPAP) automática. El equipo mediante unos sensores detecta, posteriormente procesa y diagnostica para al final variar automáticamente o no la presión de CPAP.

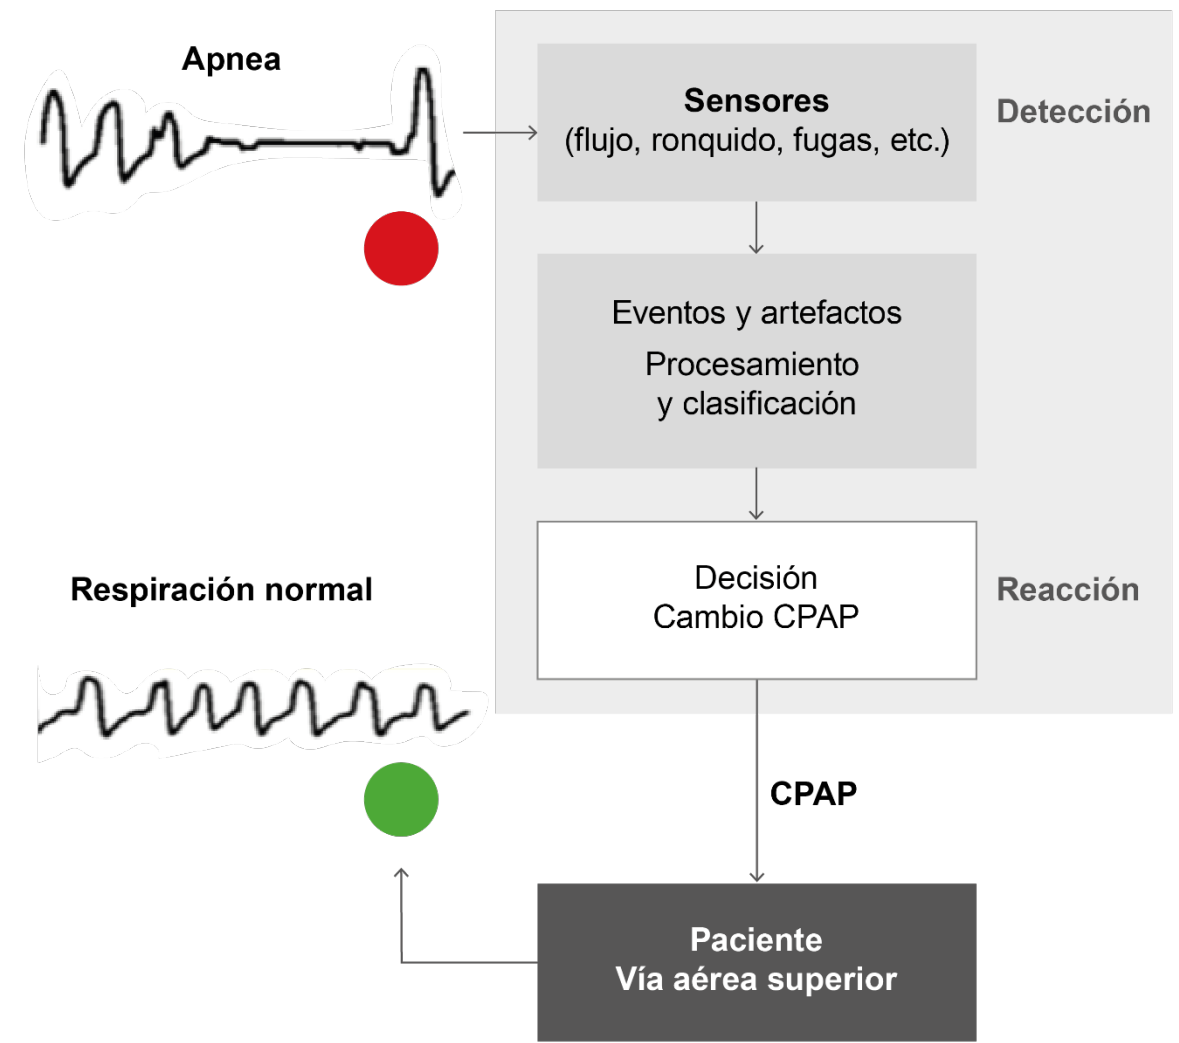

#### 4.1.4. Visitas de seguimiento

1. Es especialmente importante el seguimiento durante las primeras semanas/meses, pues ello determina el cumplimiento. Se aconseja confirmar el cumplimiento (horas de uso nocturno) de forma objetiva (descarga de tarjeta de memoria o como mínimo control de horas de uso por contador o por telemedicina). Estas visitas consistirán en valorar si hay aspectos que mejoran o empeoran el cumplimiento de la terapia y si existen efectos secundarios (valoración de la adaptación). En concreto, es necesario evaluar la mejoría clínica (calidad de vida/somnolencia/fatiga/asfixias, entre otros). Además, habrá que proceder a las pertinentes recomendaciones terapéuticas si se precisa. Finalmente, evaluar si el sujeto sigue las recomendaciones de alimentación, ejercicio y sueño salud. Cabe mencionar que la mejoría de la nicturia es un buen marcador de buen cumplimiento.
2. Otro punto es la derivación a primaria si no hay problemas y la adaptación y el cumplimiento es adecuado. Los criterios pueden ir de 3 meses a 6 meses, obviamente dependiendo del entreno de los médicos, enfermeras o especialistas de primaria y su contacto con la unidad de sueño.

A modo de resumen puede decirse que si la forma de trabajo actual se basa en los siguientes puntos: trabajo en RED, telemedicina, medicina centrada en el paciente y medicina personalizada o de precisión, sin duda la función de enfermería debe ser mucho más amplia, no solo en el seguimiento. El trabajo de cribaje y la realización de pruebas simplificadas en el domicilio son opciones necesarias para adaptarse a esta realidad cambiante. Siempre que se implique al personal de enfermería en el manejo de los pacientes, se debe facilitar un acceso directo y rápido al personal médico en caso de duda, complicación o necesidad de consulta, asegurando así el trabajo multidisciplinario<sup>22,34-43</sup>.

#### BIBLIOGRAFÍA:

1. Grote L. How to organise teaching activities for the scoring of cardiorespiratory polygraphies? Experiences from three Swedish Sleep Society teaching courses. *J Sleep Res* 2018; e12774. doi: 10.1111/jsr.12774.
2. Colvin LJ, Cartwright A, Freedman N, Rogers AE, Vana KD. Nurse practitioners and physician assistants are qualified to perform home sleep apnea test clinical evaluations. *J Clin Sleep Med* 2018; 14:293. doi: 10.5664/jcsm.6958
3. McEvoy RD, Chai-Coetzer CL, Antic NA. Ambulatory Diagnosis and Management of Obstructive Sleep Apnea Screening Questionnaires, Diagnostic Tests, and the Care Team. *Sleep Med Clin* 2016; 11:265-72. doi: 10.1016/j.jsmc.2016.05.001.
4. Lim DC, Pack AI. Obstructive Sleep Apnea: Update and Future. *Annu Rev Med* 2017; 68:99-112. doi: 10.1146/annurev-med-042915-102623.
5. Gong F, Chen X, Wu Y, Yao D, Xie L, Ouyang Q et al. Nurse vs. physician-led care for obstructive sleep apnoea: A systematic review and meta-analysis of randomized trials. *J Adv Nurs*. 2018 Mar;74(3):501-506. doi: 10.1111/jan.13346. Epub 2017 Dec 18. PMID: 28543355.
6. Lévy P, Kohler M, McNicholas WT, Barbé F, McEvoy RD, Somers VK, et al. Obstructive sleep apnoea syndrome. *Nat Rev Dis Primers* 2015; 1:15015. doi: 10.1038/nrdp.2015.15.
7. Koeller E, MacDonald R, Greer N, Wilt TJ. The Comparative Effectiveness, Harms, and Cost of Care Models for the Evaluation and Treatment of Obstructive Sleep Apnea (OSA): A Systematic Review [Internet]. Washington (DC): Department of Veterans Affairs (US); 2016 Sep. PMID: 28715166.
8. Askland K, Wright L, Wozniak DR, Emmanuel T, Caston J, Smith I. Educational, supportive and behavioural interventions to improve usage of continuous positive airway pressure



- machines in adults with obstructive sleep apnoea. *Cochrane Database Syst Rev*. 2020 Apr 7;4(4):CD007736. doi: 10.1002/14651858.CD007736.pub3. PMID: 32255210.
9. Chiner E, Arriero JM, Signes-Costa J, Marco J, Fuentes I. Validation of the Spanish version of the Epworth Sleepiness Scale in patients with a sleep apnea syndrome. *Arch Bronconeumol*. 1999 Oct;35(9):422-7. doi: 10.1016/s0300-2896(15)30037-5.
10. Antic NA, Buchan C, Esterman A, Hensley M, Naughton MT, Rowland S, et al. A randomized controlled trial of nurse-led care for symptomatic moderate-severe obstructive sleep apnea. *Am J Respir Crit Care Med* 2009;179(6):501-8. doi: 10.1164/rccm.200810-1558OC.
11. Patout M, Arbane G, Cuvelier A, Muir JF, Hart N, Murphy PB. Polysomnography versus limited respiratory monitoring and nurse-led titration to optimize non-invasive ventilation set-up: a pilot randomised clinical trial. *Thorax* 2019;74:83-6. doi: 10.1136/thoraxjnl-2017-211067.
12. Erwin AM, Noble KA, Marshall J, Cooper S. Perianesthesia Nurses' Survey of Their Knowledge and Practice With Obstructive Sleep Apnea. *J Perianesth Nurs* 2019;34(1):39-50. doi: 10.1016/j.jopan.2018.01.008.
13. Valerio TD, Heaton K. The effects of an online educational program on nurse practitioners' knowledge of obstructive sleep apnea in adults. *J Am Assoc Nurse Pract* 2014;26(11):603-11. doi: 10.1002/2327-6924.12097.
14. Chai-Coetzer CL, Antic NA, Rowland LS, Catcheside PG, Esterman A, Reed RL, et al. A simplified model of screening questionnaire and home monitoring for obstructive sleep apnoea in primary care. *Thorax* 2011; 66:213-9. doi: 10.1136/thx.2010.152801. 21252389.
15. Comer DM. Feasibility of a respiratory nurse specialist-led sleep disorder service in a district general hospital. *J R Coll Physicians Edinb* 2017; 47:156-8. doi: 10.4997/JRCPE.2017.213.
16. Montserrat JM, Leuza E. Manual SEPAR de procedimientos. Volumen 2. 2014.
17. Farré R, Montserrat JM. Principles of CPAP and auto-adjusting CPAP devices. *Principles of CPAP and auto-adjusting CPAP devices*. *Breathe* 2008;5(1):43-50.
18. Isetta V, Torres M, González K, Ruiz C, Dalmases M, Embid C, et al. A New mHealth application to support treatment of sleep apnoea patients. *J Telemed Telecare* 2017; 23:14-8. doi: 10.1177/1357633X15621848.
19. Isetta V, León C, Torres M, Embid C, Roca J, Navajas D, et al. Telemedicine-based approach for obstructive sleep apnea management: building evidence. *Interact J Med Res* 2014;3: e6. doi: 10.2196/ijmr.3060.
20. Lugo V, Villanueva JA, Garmendia O, Montserrat JM. The role of telemedicine in obstructive sleep apnea management. *Expert Rev Respir Med* 2017; 11:699-709. doi: 10.1080/17476348.2017.1343147.
21. López-López L, Torres-Sánchez I, Cabrera-Martos I, Ortiz-Rubio A, Granados-Santiago M, Valenza MC. Nursing Interventions Improve Continuous Positive Airway Pressure Adherence in Obstructive Sleep Apnea with Excessive Daytime Sleepiness: A Systematic Review. *Rehabil. Nurs.* 2018. doi: 10.1097/rnj.000000000000190.
22. Suárez-Girón M, Bonsignore MR, Montserrat JM. New organisation for follow-up and assessment of treatment efficacy in sleep apnoea. *Eur Respir Rev* 2019;28(153): 190059. doi: 10.1183/16000617.0059-2019.
23. Busetto L, Dicker D, Azran C, Batterham RL, Farpour-Lambert N, Fried M, et al. Obesity Management Task Force of the European Association for the Study of Obesity Released. Practical Recommendations for the Post-Bariatric Surgery Medical Management. *Obesity Surgery* 2018; 28:2117-212. doi: 10.1007/s11695-018-3283-z.
24. Lojander J, Mustajoki P, Rönkä S, Mecklin P, Maasilta P. A nurse-managed weight reduction programme for obstructive sleep apnoea syndrome. *J Intern Med* 1998; 244:251-5. doi: 10.1046/j.1365-2796.1998.00387. x.

25. Yaeger A, Cash NR, Parham T, Frankel DS, Deo R, Schaller RD. A Nurse-Led Limited Risk Factor Modification Program to Address Obesity and Obstructive Sleep Apnea in Atrial Fibrillation Patients. *J Am Heart Assoc* 2018;7(23): e010414. doi: 10.1161/JAHA.118.010414.
26. Wild MR, Engleman HM, Douglas NJ, Espie CA. Can psychological factors help us to determine adherence to CPAP? A prospective study. *Eur Respir J* 2004; 24:461-5. doi: 10.1183/09031936.04.00114603.
27. Olsen S, Smith S, Oei TP. Adherence to continuous positive airway pressure therapy in obstructive sleep apnoea sufferers: a theoretical approach to treatment adherence and intervention. *Clin Psychol Rev* 2008;28(8):1355-71. doi: 10.1016/j.cpr.2008.07.004.
28. Sawyer AM, Gooneratne NS, Marcus CL, Ofer D, Richards KC, Weaver TE. A systematic review of CPAP adherence across age groups: clinical and empiric insights for developing CPAP adherence interventions. *Sleep Med Rev* 2011;15(6):343-56. doi: 10.1016/j.smr.2011.01.003.
29. Crawford MR, Espie CA, Bartlett DJ, Grunstein RR. Integrating psychology and medicine in CPAP adherence--new concepts? *Sleep Med Rev* 2014;18(2):123-39. doi: 10.1016/j.smr.2013.03.002.
30. Berry RB, Albertario CL, Harding SM, et al. for the American Academy of Sleep Medicine. The AASM Manual for the Scoring of Sleep and Associated Events: Rules, Terminology and Technical Specifications. Version 2.5. Darien IL: American Academy of Sleep Medicine 2018.
31. Iber C, Ancoli-Israel, Cheeson A, and Quan SF for the American Academy of Sleep Medicine. The AASM Manual for the Scoring of Sleep and Associated Events. Rules, Terminology and Technical Specifications, 1.<sup>a</sup> ed Westchester. Illinois: American Academy of Sleep Medicine 2007.
32. Sánchez-Armengol AI, Carmona Bernal C, Asensio Cruz MI, Caballero Eraso C. Capítulo 15 Polisomnografía, poligrafía, oximetría. Requisitos e interpretación de resultados. En: Soto Campos JG (ed.). *Manual de diagnóstico y terapéutica en neumología* (3.<sup>a</sup> edición). Majadahonda (Madrid): ERGÓN, 2016. p. 195-207.
33. Bloch KE, Huber F, Furian M, Latshang TD, Lo Cascio CM, Nussbaumer-Ochsner Y, Senn O, Russi EW, Kohler M, Schoch OD, Turk A, Imhof E, Laube I, Matthews F, Thurnheer R. Autoadjusted versus fixed CPAP for obstructive sleep apnoea: a multicentre, randomised equivalence trial. *Thorax*. 2018; 73: 174-184. doi: 10.1136/thoraxjnl-2016-209699.
34. Martínez-García MA, Campos-Rodríguez F, Barbé F, Gozal D, Agustí A. Precision medicine in obstructive sleep apnoea. *Lancet Respir Med* 2019;456-64. doi: 10.1016/S2213-2600(19)30044-X.
35. Sánchez-de-la-Torre M, Barbé F. Personalized medicine in sleep apnea: Towards a new paradigm of comprehensive disease management]. *Med Clin (Barc)* 2016; 147:444-6. doi: 10.1016/j.medcli.2016.09.002.
36. Torres G, Sánchez-de-la-Torre M, Barbé F. Precision medicine: A modern odyssey. *Arch Bronconeumol* 2016;52:455-6. doi: 10.1016/j.arbres.2016.02.004.
37. Hilbert J, Yaggi HK. Patient-centered care in obstructive sleep apnea: A vision for the future. *Sleep Med Rev* 2018; 37:138-47. doi: 10.1016/j.smr.2017.02.004.
38. Feemster LC, Saft HL, Bartlett SJ, Parthasarathy S, Barnes T, Calverley P, et al. Patient-centered Outcomes Research in Pulmonary, Critical Care, and Sleep Medicine. An Official American Thoracic Society Workshop Report *Ann Am Thorac Soc* 2018;15(9):1005-15. doi: 10.1513/AnnalsATS.201806-406WS.
39. Kushida CA, Nichols DA, Holmes TH, Miller R, Griffin K, Cardell CY, et al. SMART DOCS: a new patient-centered outcomes and coordinated-care management approach for the future practice of sleep medicine. *SLEEP* 2015; 38:315-26. doi: 10.5665/sleep.4422.

40. Shelgikar AV, Durmer JS, Joynt KE, Olson EJ, Riney H, Valentine P. Multidisciplinary sleep centers: strategies to improve care of sleep disorders patients. *J Clin Sleep Med* 2014;10(6):693-7. doi: 10.5664/jcsm.3808.
41. Redline S, Baker-Goodwin S, Bakker JP, Epstein M, Hanes S, Hanson M, et al; Sleep Apnea Patient-Centered Outcomes Network. Patient Partnerships Transforming Sleep Medicine Research and Clinical Care: Perspectives from the Sleep Apnea Patient-Centered Outcomes Network. *J Clin Sleep Med* 2016; 12:1053-8. doi: 10.5664/jcsm.5948.
42. Mediano O, Barbé-Illa F, Montserrat JM. A network management approach to sleep apnea-hypopnea syndrome: Healthcare units. *Arch Bronconeumol*. 2017; 53:184-185. doi: 10.1016/j.arbres.2016.06.009.
43. Mansfield D. How to assess, diagnose, refer and treat adult obstructive sleep apnea: a commentary on the choices. *MJA* 2013; 199: S21–S26. doi: 10.5694/mja13.10909.
