# Supplementary material
Source: Elsevier journal article supplement (https://www.sciencedirect.com/science/article/pii/S0300289621004099)
Supplement: mmc23 [file S0300289621004099:mmc23.pdf]

## Capítulo 8

### Metodología del DIC sobre el sueño

**José Aurelio Cordero Guevara.** Epidemiólogo. Unidad de Metodología y Estadística. Instituto de Investigación Sanitaria Bioaraba.

Para el desarrollo de este Documento Internacional de Consenso (DIC) se utilizó una adaptación del método RAND-UCLA<sup>1,2</sup>. El establecimiento de los aspectos a consensuar, la selección de los expertos, así como de los responsables de los diferentes grupos de trabajo, se llevaron a cabo por las organizaciones responsables y la coordinadora general del proyecto.

Los miembros de los grupos de trabajo identificaron los aspectos que *a priori* requerían o no una búsqueda sistemática de la literatura científica de los temas a abordar. Con el apoyo de un metodólogo se elaboraron las preguntas pertinentes y se identificaron los aspectos que requerían una búsqueda sistemática de la literatura científica. Las búsquedas estructuradas fueron realizadas por documentalistas expertos.

Para la elaboración del documento de consenso se partió de un informe elaborado por los/las responsables de los grupos de trabajo, basado en la búsqueda sistemática realizada previamente, en el que se identificaron claramente los diferentes aspectos abordados y sobre los que se pidió, para cada uno, su grado de acuerdo a los expertos de cada grupo, seleccionando un número del 1 al 9, donde 1 significa que no están de acuerdo y 9 que están totalmente de acuerdo.

La evaluación del acuerdo se realizó en dos rondas. En algunos casos se añadió una ronda intermedia, desarrollada por los responsables (editores) del documento (**Figura 1**).

**Figura 1.** Diagrama del método utilizado (RAND/UCLA modificado).

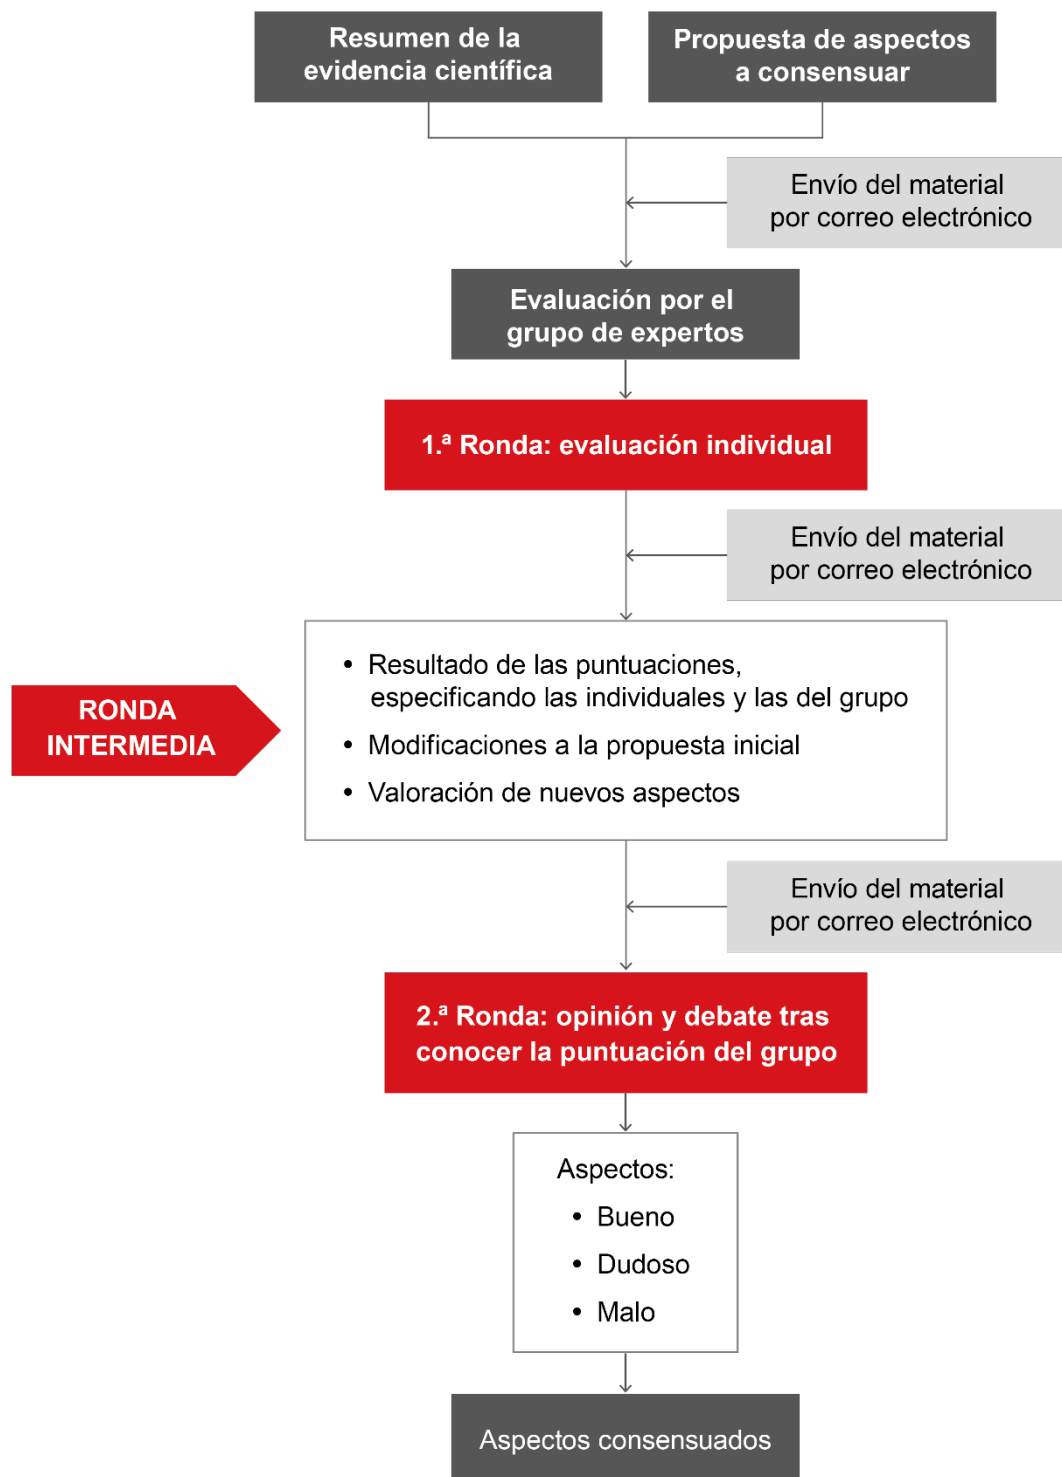

### Primera ronda

Después de que los participantes recibieron sus documentos, el moderador del grupo se puso en contacto telefónico con cada uno para asegurarse de que comprendían el

proceso y para indagar sobre los posibles problemas con la estructura de los aspectos, de las indicaciones o con las definiciones de los términos usados en el documento.

Para medir el grado de acuerdo, los expertos puntuaron a través de un formulario electrónico los diferentes aspectos a consensuar y, tras su análisis por parte del asesor metodológico, se clasificó el grado de acuerdo y se identificaron los aspectos cuyo grado de acuerdo era dudoso (Tabla 1).

**Tabla 1.** Clasificación del grado de acuerdo de los aspectos incluidos

|         | <b>Puntuación mediana</b> | <b>Grado de acuerdo</b> |
|---------|---------------------------|-------------------------|
| Bueno   | $\geq 7$                  | Sin desacuerdo          |
| Malo    | $\leq 3$                  | Sin desacuerdo          |
| Dudoso* | 4-6 o desacuerdo          |                         |

\*Los aspectos “dudosos” fueron sometidos a revisión en la evaluación presencial (segunda ronda).

## **Segunda ronda**

La segunda ronda de evaluaciones se realizó durante una reunión presencial del grupo, bajo la dirección de un moderador con conocimiento del método y del contenido del documento. Para esta ronda, los grupos recibieron formularios similares a los que se usaron para calificar en la primera ronda, pero con información adicional sobre cómo el grupo en conjunto y ellos individualmente calificaron cada aspecto. Este documento constituyó la base para el debate durante la reunión del grupo.

La finalidad de la segunda ronda fue dar a los participantes la oportunidad de comentar sus evaluaciones frente a los otros grupos, sabiendo cómo habían evaluado los demás participantes. Antes de empezar el debate del grupo se explicó la metodología a seguir para que todos los participantes entendieran lo que se esperaba de ellos.

Cada capítulo se comentó detalladamente, pidiendo a los participantes que opinaran y debatieran sobre los aspectos que creían necesarios hasta llegar a un consenso. Los cambios a introducir en el documento fueron recogidos por los coordinadores de cada grupo.

## **Clasificación del grado de acuerdo<sup>1</sup>**

La clasificación del grado de acuerdo se realizó como “bueno”, “dudoso” o “malo” para un aspecto particular según la evaluación mediana del grupo de expertos y el rango entre percentiles ajustado en función de la simetría (IPRAS).

Los aspectos con evaluaciones medianas en el tercio más alto de la escala (7-9) sin desacuerdo se clasificaron como “buenas”, aquellas con evaluaciones medianas en el tercio inferior (1-3) sin desacuerdo se clasifican como “malas”, y las que obtuvieron evaluaciones intermedias (4-6) o cualquier mediana con desacuerdo se consideraron “dudosas” (Tabla 1).

## **BIBLIOGRAFÍA:**

1. Fitch K, Bernstein SJ, Aguilar MD, Burnand B, Lacalle JR, Lazaro P, et al. The RAND/UCLA Appropriateness Method User's Manual. Santa Monica, CA: RAND publication MR-1269; [Monografía en internet]; 2001. Disponible en: [https://www.rand.org/content/dam/rand/pubs/monograph\\_reports/2011/MR1269.pdf](https://www.rand.org/content/dam/rand/pubs/monograph_reports/2011/MR1269.pdf).
2. Fitch K, Lázaro P. Using appropriateness criteria to improve health care. Eurohealth 1999; 5 (3): 19-21.
